# Supplementary material for: Lhx1 maintains synchrony among circadian oscillator neurons of the SCN
Source: eLife journal article supplement (doi:10.7554/elife.03357), 2014-07-17

## Figure 2 - figure supplement 1

A

*Rora*<sup>Cre</sup>;R26R

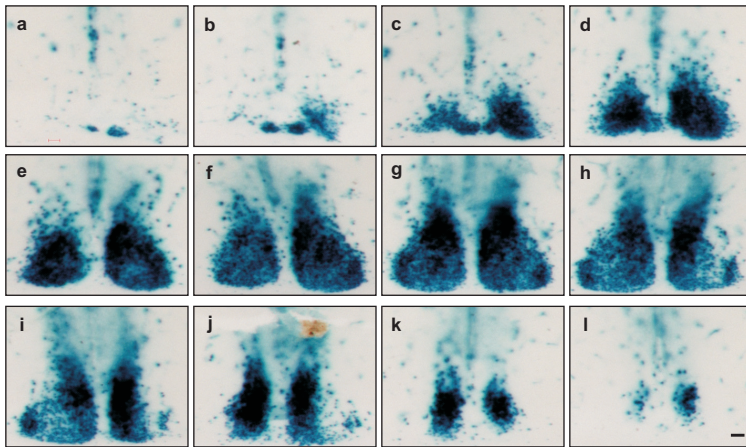

B

*Rora*<sup>Cre</sup>;Z/AP

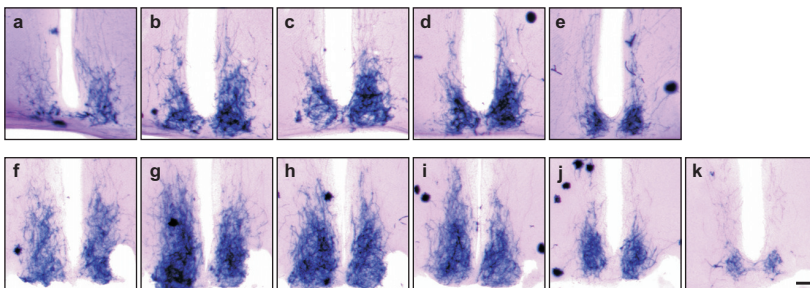

C

*Rora*<sup>Cre/Cre</sup>;  
*Lhx1*<sup>loxP/loxP</sup>

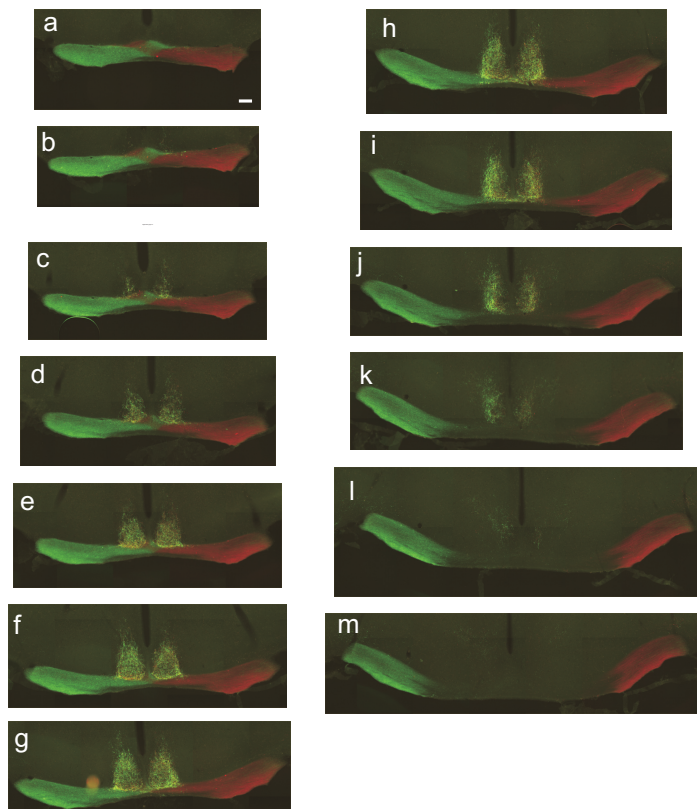

Supplement: supp [file elife-03357-supp-v1.zip]
