# Supplementary material for: Lhx1 maintains synchrony among circadian oscillator neurons of the SCN
Source: eLife. 2014 Jul 17;3:e03357. doi: 10.7554/eLife.03357 (PMC4137275; doi:10.7554/eLife.03357)
Supplement: Supplementary file 1. — Probesets and corresponding genes showing circadian expression of mRNA abundance in the mouse adult SCN. DOI: http://dx.doi.org/10.7554/eLife.03357.016 [file elife03357s001.xlsx]

## Sheet: Sheet1
Supplementary File 1. Probesets and corresponding genes showing circadian expression of mRNA abundance in the mouse adult SCN.
Probe Set ID	Gene Symbol	Gene Title	G Test	pMMC Beta	Phase	Median Temporal Circadian expression	Amplitude	CT18	CT20	CT22	CT24	CT26	CT28	CT30	CT32	CT34	CT36	CT38	CT40	CT42	CT44	CT46	CT48	CT50	CT52	CT54	CT56	CT58	CT60	CT62	CT64
1415684_at	Atg5	autophagy-related 5 (yeast)	0.00120335	0.00661	17.187	811.94	231.59	991.54	886.45	940.16	930.88	773.64	798.39	825.24	737.98	839.72	798.64	878.68	997.2	1141.98	880.32	880.87	874.97	743.23	743.83	698.53	737.52	678.8	749.53	756.13	782.87
1415686_at	Rab14	RAB14, member RAS oncogene family	0.00857333	0.000609	19.43	2715.32	390.79	2910.34	2957.56	2837.63	2727.14	2551.19	2271.41	2389.62	2258.71	2436.49	2491.79	2646.75	2598.38	3040.29	2892.85	2712.78	2856.26	2746.99	2776.15	2865.25	2717.86	2513.77	2466.62	2536.18	2812.5
1415692_s_at	Canx	calnexin	0.0145616	0.00507	19.63	11135.4	1724.96	10814.5	11938.4	12295.3	11191.8	10420.3	10409.5	11115.7	10346.7	10107.9	10165.3	11138.4	11676.5	13557.8	11738	12225.7	12253.8	11223.4	11526.5	10489.9	11579.5	10783.6	10645.8	11036.6	11132.5
1415693_at	Derl1	Der1-like domain family, member 1	0.00230459	0.0113	23.69	577.24	130.92	590.21	614.96	607.1	605.29	563.95	602.06	595.3	521.8	554.27	518.66	570.19	747.74	613.67	699.16	648.32	584.3	556.78	515.11	499.47	485.89	552.72	531.43	556.93	608.21
1415700_a_at	Ssr3	signal sequence receptor, gamma	0.00879653	0.0114	18.52	3120.23	666.89	3720.91	3406.65	3436.88	3145.84	2836.56	2850.38	3011.04	3280.92	2823.55	3031.89	3051.19	3494.99	4157.34	3332.61	3317.91	3187.39	3043.11	3089.73	3076.42	3067.83	2951.54	3271.36	3167.82	3094.63
1415711_at	Arfgef1	ADP-ribosylation factor guanine nucleotide-exchange factor 1(brefeldin A-inhibited)	0.00440419	0.00114	17.16	1242.29	242.8	1304.24	1296.91	1251.31	1268.88	1063.3	1081.92	1192.54	1081.28	1121.02	1129.04	1265.6	1548.89	1474.94	1537	1482.9	1261.26	1155.52	1182.72	1218.06	1277.1	1144.7	1081.06	1283.18	1233.27
1415712_at	Ctbp2 /// Zranb1	C-terminal binding protein 2 /// zinc finger, RAN-binding domain containing 1	0.0110506	0.0041	11.59	736.21	196.28	688.37	678.4	679.14	683.63	756.35	797.53	934.75	884.63	826.7	807.37	759.44	729.56	542.18	645.1	810.82	725.14	745.37	716.85	742.85	794.18	743.09	688.43	709.64	697.54
1415725_at	Rrn3	RRN3 RNA polymerase I transcription factor homolog (yeast)	0.0057146	0.00614	18	1055.16	146.94	1050.25	1034.75	1127.8	1068.74	925.94	928.22	1066.25	979.57	1052.53	1037.7	1176.17	1219.83	1156.68	1198.65	1060.9	1012.49	1026.25	1054.46	1012.95	1111.86	1055.86	1051.04	1144.36	1187.34
1415727_at	Apoa1bp	apolipoprotein A-I binding protein	0.0111401	0.016	11.81	2490.44	319.87	2630.04	2368.43	2318.85	2191.39	2483.85	2443.96	2476.31	2777.75	2660.75	2499.42	2369.15	2138.01	2387.63	2236.68	2146.54	2159.23	2599.97	2497.03	2519.59	2505.49	2753.67	2774.98	2570.64	2614.2
1415747_s_at	Riok3	RIO kinase 3 (yeast)	0.0183891	0.0359	9.18	2521.29	411	2190.55	2270.85	2396.54	2387.59	2494.69	2406.65	2737.5	2633.16	2423.68	2594.11	2527.23	2441.62	2245.39	2654.84	2533.33	2668.21	2515.36	2619.95	2859.6	3012.54	2670.52	2601.64	2480.07	2389.51
1415749_a_at	Rragc	Ras-related GTP binding C	0.0165373	0.0115	19.21	2158.01	531.6	2550.58	2191.12	2353.82	2113.51	1950.4	1819.91	1964.46	1967.27	2068.48	2222.06	2266.85	2187.44	2883.1	2359.34	2154.72	2003.34	2088.25	2119.26	2150.29	2308.17	2142.63	2161.31	2216.71	2220.44
1415779_s_at	Actg1	actin, gamma, cytoplasmic 1	0.00569133	0.0102	17.746	23247.8	4000.76	24943.9	23261.4	23116.3	21111.1	21010.7	21515.4	20646.7	21298.6	21304.2	23059	26007	28648.2	24728	25412.9	23352.9	23234.1	22780.2	22628	25050.6	24045.9	23141.2	23541.8	26071.5	24759.7
1415780_a_at	Armcx2	armadillo repeat containing, X-linked 2	0.000341551	0.00287	9.49	1929.37	614.69	1729.5	1612.48	1718.69	1827.46	1932.45	2023.65	2679.11	2027.69	2117.35	1926.3	1710.29	1449.73	1982.35	1711.05	1822.55	1920.51	1993.74	2079.77	2000.27	2187.49	2058.29	2004.03	1566.5	1600.28
1415785_a_at	Cct8	chaperonin containing Tcp1, subunit 8 (theta)	0.00156941	0.00103	17.726	3957.67	790.14	4266.8	4449.46	3948.93	3966.41	3715.36	3688.7	3543.67	3758.57	3836.4	3976.58	3992.49	3989.5	5123.95	4360.72	4105.11	4009.15	4237.45	3851.01	3683.14	3826.68	3749.28	3723.12	3723.57	4172.53
1415793_at	Pnpo	pyridoxine 5'-phosphate oxidase	0.00823101	0.00521	7.3	1026.78	406.8	972.36	785.01	1066.26	846.47	958.76	1067.8	860.92	1159.2	1228.1	1173.87	1039.68	443.52	585.46	472.87	449.76	641.35	1013.89	1165.62	1191.78	1257.11	1139.53	1243.5	1052.99	1005.3
1415799_at	Wbp11	WW domain binding protein 11	1.17e-05	0.000229	8.32	1736.67	228.36	1586.28	1667.32	1716.35	1774.8	1762.06	1842.31	1875.7	1903.39	1797.64	1819.29	1726.33	1542.96	1617.21	1446.68	1523.45	1697.4	1817.2	1747.01	1889.6	1825.46	1713.7	1789.07	1582.18	1570.79
1415802_at	Slc16a1	solute carrier family 16 (monocarboxylic acid transporters), member 1	0.000456683	0.00236	6.5	2023.88	474.36	1833.35	1912.85	2082.1	1969.71	2033.67	2335.42	2184.91	2407.4	2053.65	1894.57	1828.48	2062.47	1675.2	1458.69	1672.17	2014.1	2204.95	2322.62	2185.06	2061.76	2125.8	1981.55	1935.91	1801.33
1415806_at	Plat	plasminogen activator, tissue	3.03e-08	9.73e-05	6.1	751.94	245.93	508.05	655.31	769.94	826.96	849.26	846.85	999.9	855.58	682.26	623.76	517.69	529.29	544.94	594.51	766.49	747.23	831.33	859.35	762.87	759.77	718.76	756.65	584.58	529.76
1415807_s_at	Sfrs2	splicing factor, arginine/serine-rich 2 (SC-35)	0.000100824	0.00101	18.996	498.19	190.08	628.12	607.24	486.68	453.16	478.07	358.19	444.73	374.13	447.31	466.2	562.21	626.71	738.34	661.44	518.01	506	456.13	460.91	497.48	498.58	497.81	568.27	536.9	550.58
1415816_at	Cct7	chaperonin containing Tcp1, subunit 7 (eta)	0.000959938	0.00159	20.25	5273.69	964.88	6185.38	5725.28	5749.82	5274.39	4912.71	4792.16	4951.42	5145.94	4541.92	4837.07	5147.58	5789.93	6471.67	5832.23	5272.99	5440.35	5567.01	5022.16	5195.35	5363.55	4861.69	5335.02	5076.15	5909.23
1415817_s_at	Cct7	chaperonin containing Tcp1, subunit 7 (eta)	0.000128039	0.000442	18.53	3606.79	641.24	4214.31	4044.92	3863.62	3548.38	3303.84	3406.03	3099.45	3582.1	3361.72	3386.04	3655.14	3897.16	4381.93	4082.94	3600.14	3740.31	3750.07	3613.44	3398.46	3328.42	3112.34	3655.12	3384.06	3890.42
1415830_at	Orc5l	origin recognition complex, subunit 5-like (S. cerevisiae)	0.0018639	0.00406	18.996	766.46	144.56	862.49	798.31	772.4	640.34	615.21	592.45	616.69	624.98	678.23	739.49	765.2	842.4	817.67	881.57	804.38	749.75	709.22	687.1	826.8	767.73	761.14	805.39	785.5	840.04
1415839_a_at	Npm1	nucleophosmin 1	0.0298864	0.00964	13.34	15041.4	1634.32	14251.4	14979.1	15694.4	14545.2	14735.4	14304.3	15445.4	15371	16732.7	15602.3	16107	15103.6	13464	14110.6	14196.3	14013	14809	15224.3	14068.4	15903.7	15925.2	15711.3	14830.6	15223.6
1415863_at	Eif4g2	eukaryotic translation initiation factor 4, gamma 2	0.017634	0.0107	15.34	10824.7	1317.24	11156.6	11439	10915.8	11018.8	10823.4	10632.8	11875.5	10688.4	10441.5	10156.4	10925.4	12293.3	11953	12447.2	12567.9	11701.1	10656.9	10120.5	10118.4	10185.4	10612	9933.47	10826	10657.3
1415867_at	Cct4	chaperonin containing Tcp1, subunit 4 (delta)	0.00202142	0.00344	20.57	4950.77	817.47	5368.97	5414.49	4922.37	5104.76	4764.31	4409.18	4431.11	4262.97	4612.7	4741.29	5205.72	5785.8	5124.44	5093.83	4487.87	5397.21	4866.23	4736.11	4979.18	4517.03	4695.3	5015.16	5334.96	5897.9
1415909_at	Stip1	stress-induced phosphoprotein 1	0.00114036	0.00548	22.07	1554.59	414.42	1840.59	1766.76	1627.85	1810.79	1612.74	1526.96	1124.79	1273.24	1377.05	1255.47	1676.06	1932.94	1849.07	1618.29	1253.96	1635.42	1581.77	1439.15	1241.82	1104.11	1361.07	1527.41	1518.28	1859.2
1415914_at	Hnrnpab	heterogeneous nuclear ribonucleoprotein A/B	0.000272625	0.00157	16.92	2845.04	621.21	3322.51	3085.65	2827.14	2704.09	2636.68	2610.25	2841.4	2735.22	2724.36	2845.31	2934.69	3355.01	3813.02	3440.89	3117.44	2955.56	2819.87	2587.75	2570.6	2713.17	2852.22	3046.47	2844.78	2868.36
1415925_a_at	Nup62	nucleoporin 62	0.0136623	0.00508	15.84	325.63	69.29	362.9	290.89	342.7	304.73	293.29	270.21	291.45	311.18	349.73	344.81	328.28	370.43	408.78	344.61	329.3	307.45	305.43	322.97	329.71	298.36	307.57	319.64	357.04	335.5
1415979_x_at	Rpl7	ribosomal protein L7	0.0359473	0.00517	5.7	15214.7	675.39	15062.6	14888.2	14819.5	15630.3	15836.4	15844.4	15564.1	15902.1	15540.9	15576.8	15080.6	14797.4	14551.4	14904.1	14653.8	15242.9	15787.5	15232.5	14852.8	15077.4	15515.2	15270.8	15072.8	15196.9
1415986_at	Clcn4-2	chloride channel 4-2	9.69e-05	0.000566	8.41	2183.52	377.5	2129.63	2043.96	2003.22	2115.2	2272.18	2563.68	2579.62	2381.03	2315.77	2333.93	2138.42	2006.8	2132.04	2034.79	1824.62	2087.07	2335.05	2248.7	2323.3	2253.44	2228.61	2358.37	2133.18	2077.28
1415991_a_at	Klhdc3	kelch domain containing 3	0.0492397	0.00529	4.7	2477.52	628.34	2655.01	2307.66	2484.49	2451.77	2487.61	2651.7	2604.99	2433.14	2488.13	2423.87	2372.24	2077.27	1732.44	2148.48	1963.05	2429.84	2564.22	2716.69	2989.11	2739.29	2596.26	2470.56	2438.19	2669.72
1415993_at	Sqle	squalene epoxidase	0.00594877	0.000395	15.16	1371.79	422.43	1581.65	1415.5	1458	1221.6	1166.98	1259.5	1481.6	1310.78	1381.21	1358.87	1529.14	1822	2011.84	1616.18	1687.61	1362	1362.36	1197.71	1218.77	1268.81	1270.08	1239.11	1459.81	1419.86
1416004_at	Ywhah	tyrosine 3-monooxygenase/tryptophan 5-monooxygenase activation protein, eta polypeptide	0.000157189	0.000795	19.25	15715.3	3607.2	18240	16047.5	15790.1	14960	14642.1	15082.2	13463.4	14389.8	13896	14799	15814	18255.8	20677.8	18159.7	16083.4	16015.9	15640.5	14392.4	15603.1	15311.3	15144.5	16393.7	16464.1	17192.9
1416024_x_at	Cct3	chaperonin containing Tcp1, subunit 3 (gamma)	4.5e-05	0.000193	18.263	4744.94	852.62	4973.41	4764.87	4817.91	4697.15	4376.9	4100.7	4370.35	4210.18	4242.73	4517.53	4975.06	5585.81	5805.95	5615.3	4817.27	5177.85	4739.21	4342.67	4460.46	4500.51	4505.19	4773.65	4750.67	5019.22
1416030_a_at	Mcm7	minichromosome maintenance deficient 7 (S. cerevisiae)	0.0218086	0.00674	15.96	115.27	53.48	130.5	149.84	107.28	128.37	109.56	95.24	124.43	118.77	112.49	113.24	110.06	130.7	192.43	155.39	127.23	136.81	130.95	94.75	108.76	87.49	102.74	85.47	103.61	117.3
1416064_a_at	Hspa5	heat shock protein 5	0.00537884	0.00369	15.82	18347.1	5410.29	20032.4	19387.7	17819.6	17730.1	16489.9	16267.5	20754.9	16505.3	16922.8	18204.1	20258.7	26841.2	22381.2	21855.3	19197.7	19414.8	17068.6	16020.6	18490	17397	18171.4	17526.5	19835.6	20910.2
1416071_at	Ddx18	DEAD (Asp-Glu-Ala-Asp) box polypeptide 18	0.00512407	0.00682	16.41	530.18	114.77	534.13	535.05	575.9	564.15	500.42	535.52	503.63	501.22	489.41	554.41	604.24	695.62	610	543.64	583.7	518.09	481.37	466.09	498.81	490.76	484.96	517.59	570.79	526.23
1416101_a_at	Hist1h1c	histone cluster 1, H1c	0.00168698	0.0123	11.1	1896.96	564.61	1556.58	1400.49	1338.4	1576.08	1647.42	1926.8	2467.63	2264.59	1923.39	1894.55	1653.42	1918.13	1906.08	1800.9	1661.99	1726.7	1899.38	1978.84	1991.49	1971.1	1987.87	2315.57	1734.87	1595.78
1416125_at	Fkbp5	FK506 binding protein 5	0.000476746	0.00175	18.714	673.08	206.95	776.4	684.18	714.07	654.99	469.35	451.89	558.44	661.99	634.09	691.66	746.35	779.74	832.58	591.09	694.65	738.98	571.43	511.88	644.98	539.75	563.67	865.8	830.85	734.82
1416145_at	Dhx15	DEAH (Asp-Glu-Ala-His) box polypeptide 15	0.0332677	0.00456	16.28	5686.92	1123.01	5800.09	5718.5	5548.31	5816.06	5253.52	5141.85	6222	4918.58	5175.24	5372.45	5972.85	7164.6	6295.72	6780.43	6582.5	6721.41	5655.35	5168.19	5432.6	5616.63	5359.44	5289.13	5788.12	5969.04
1416150_a_at	Sfrs3	splicing factor, arginine/serine-rich 3 (SRp20)	0.0141367	0.000626	14.27	6062.41	1208.21	6485.32	6316.09	5808.55	5835.43	5832.31	5904.66	5626.65	6223.02	6096	6410.01	6853.91	7248.35	6760.01	6331.35	6962.13	6310.94	5779.97	5692.17	4831.93	5957.58	5665.74	5724.38	6096.25	6028.81
1416152_a_at	Sfrs3	splicing factor, arginine/serine-rich 3 (SRp20)	3.45e-05	0.000706	19	3038.99	504.76	3224.87	3341.45	3168.73	3150.17	3017.44	2719.14	2752.19	2765.7	3052.93	3018.13	3233.31	3489.02	3363.29	3115.95	3104.87	3025.06	3136.54	2912.82	2479.5	2818.95	2858.87	2992.77	3080.19	3022.67
1416155_at	Hmgb3	high mobility group box 3	0.0010006	0.00523	9.42	1855.71	1465.76	1466.73	1255.77	1207.64	1367.25	1879.48	2493.8	4085.17	2272.12	1967.87	1774.01	1324.68	1398.81	1940.44	1720.06	1831.94	1813.1	1940.6	1992.55	2067.3	2652.31	2434.46	1935.23	1509.05	1153.65
1416175_a_at	Vdac3	voltage-dependent anion channel 3	0.0361153	0.0246	20.83	7575.2	1452.45	8649.21	8058.13	8908.55	7700.16	7169.72	6517.58	6003.66	7126.07	7404.05	7398.69	7841.43	7109.26	8630.2	7907.18	7717.9	7487.43	7318.85	7791.79	7483.1	7662.97	7161.34	8076.26	7264.57	7960.75
1416199_at	Kifc3	kinesin family member C3	0.00112443	0.00118	5.7	413.68	88.88	427.31	387.33	409.18	420.01	397.99	419.74	482.38	458.66	439.03	384.56	392.19	350.02	304.62	361.22	370.29	385.39	433.4	449.42	479.74	427.37	422.92	418.17	379.62	404.37
1416221_at	Fstl1	follistatin-like 1	0.0412676	0.00528	3.3	510.48	206.18	507.23	477.93	556.96	483.03	535.72	661.49	417.63	629.43	614.7	660.54	563.93	411.1	360.13	353.3	348.44	347.58	463.84	513.73	494.34	541.22	546.45	759.94	521.87	501.29
1416250_at	Btg2	B-cell translocation gene 2, anti-proliferative	0.00214954	0.00485	8.89	289.11	181.34	232.24	270.96	254.36	342.41	343.75	318.59	529.54	246.08	278.5	288.39	241.76	281.65	228.36	306.36	358.95	428.73	354.67	316.14	331.43	289.84	289.96	243.52	166.85	212.12
1416256_a_at	Tubb5	tubulin, beta 5	0.0464655	0.00668	20.78	8077.19	941.76	9212.52	8145.34	8306.92	8481.1	7849.91	8009.04	7753.4	7766.26	7511.8	7329	7884.71	7673.08	8793.66	8728.23	8300.52	8719.29	8930.75	7856.26	8525.89	7805.64	7852.6	8419.63	7741.09	8451.46
1416257_at	Capn2	calpain 2	0.0099251	0.00707	22.41	1252.2	181.53	1267.11	1286.14	1242.37	1346.14	1159.29	1151.81	1172.52	1303.24	1102.41	1187.08	1263.43	1213.81	1465.46	1294.06	1362.66	1372.18	1262.04	1161.2	1137.91	1192.17	1173.52	1236.24	1307.18	1363.9
1416282_at	Psmc3	proteasome (prosome, macropain) 26S subunit, ATPase 3	0.0128193	0.0175	19.08	3996.91	678.84	4392.74	4026.57	4243.52	3749.32	3643.07	3632.98	3749.1	3951.15	3968.01	4005.64	4363.29	4046.4	3988.17	3857.37	3360.72	3760.35	3927.88	3870.35	4241.68	4093.26	4126.67	4389.48	4329.39	4718.4
1416288_at	Dnaja1	DnaJ (Hsp40) homolog, subfamily A, member 1	9.5e-06	0.000443	20.86	5666.2	1080.82	6801.84	6379.99	6176.48	5920.42	5778.65	5290.02	5197.63	4750.69	5027.84	5219.71	6272.47	6912.33	6547.76	6125.07	5443.13	6816.12	5542.09	5222.58	5397.54	5146.69	5225.51	5553.75	6145.58	6863.77
1416308_at	Ugdh	UDP-glucose dehydrogenase	0.037996	0.00792	19.02	1373.82	311.79	1349.82	1312.56	1552.77	1273.87	1137.24	1098.04	1184.45	1135.51	1254.38	1300.08	1481.16	1529.72	1721.62	1486.39	1432.12	1377.62	1284.67	1421.02	1421.52	1474.5	1296.3	1370.02	1488.73	1521.33
1416323_at	Kctd20	potassium channel tetramerisation domain containing 20	0.0270676	0.0317	20.56	242.04	47.81	259.6	241.35	273.04	226.32	210.07	185.55	193.13	205.04	214.98	237.36	232.08	203.26	276.2	261.12	268.28	267.27	243.47	242.72	244.52	281.17	241.22	235.64	261.13	279.66
1416332_at	Cirbp	cold inducible RNA binding protein	0.00461663	0.0237	12.73	2031.97	608.52	1773.35	1708.58	1549.95	1401.95	1673.8	2074.9	2618.99	2473.94	2417.4	2474.8	2055.56	1835.82	1994.1	2033.65	2515.07	1603.62	1872.82	2030.3	2021.78	2448.5	2460.35	2486.71	2108.01	1659.48
1416340_a_at	Man2b1	mannosidase 2, alpha B1	2.71e-05	0.000881	5.2	470.63	96.19	448.86	450.45	425.92	469.15	457.01	491.33	528.16	507.18	504.64	492.35	420.06	401.17	406.96	383.59	411.18	406.94	496.28	478.44	502.83	541.2	512.19	575.98	472.1	423.37
1416344_at	Lamp2	lysosomal-associated membrane protein 2	0.00914593	0.00103	7	1402.47	364.57	1257.17	1331.51	1440.97	1524.03	1304.27	1564.07	1450.46	1821.59	1381.92	1438.87	1274.31	1211.18	1092.45	1191.98	1266.47	1147.95	1305.65	1523.95	1694.22	1411.27	1549.63	1619.72	1432.53	1393.67
1416354_at	Rbmx	RNA binding motif protein, X chromosome	2.4e-07	0.000176	13.86	316.58	77.85	314.45	304.73	306	277.23	307	318.72	338.89	419.11	406.61	373.81	322.56	283.17	288.34	269.63	273.39	290.51	314.38	338.09	390.1	425.32	367.3	362.51	319.69	296.11
1416362_a_at	Fkbp4	FK506 binding protein 4	4.89e-05	0.000658	19.23	755.27	220.09	994.71	818.56	794.15	721.75	707.43	554.53	642.88	717.79	691.04	678.11	809.13	875.68	982.53	939.68	660.92	801.32	803.28	715.29	622.49	673.23	712.34	788.79	831.3	950.99
1416364_at	Hsp90ab1	heat shock protein 90 alpha (cytosolic), class B member 1	0.00137164	0.00319	18.55	13790.5	3051.1	14545.8	14945	13947.2	13707.3	13873.7	13272.4	14167	12713.1	13210	12654.1	12692.4	14330.7	18572.3	16232.3	15697.1	15457.1	15012.4	13283.8	12470.1	13030.8	12686.2	12967.2	13589.4	14077.6
1416407_at	Pea15a	phosphoprotein enriched in astrocytes 15A	0.0388678	0.0202	15.6	8955.78	4425.1	10301.5	9987.17	7728.3	9000.61	9467.3	10007.1	11755.5	8120.29	7294.15	7208.58	7580.89	11040.7	16043.3	14842.9	13868.9	10629.7	9798.25	7926.31	7419.47	7193.08	8151.42	7842.46	7749.22	8910.95
1416428_at	Thap11	THAP domain containing 11	0.00760969	0.00487	17.758	716.66	125.3	771.77	724.52	759.16	715.03	688.74	676.29	732.13	676.79	721.81	706.58	836.81	877.61	691.31	720.86	765.83	684.01	627.02	632.25	692.91	686.69	670.32	718.29	802.55	748.63
1416448_at	Itpa	inosine triphosphatase (nucleoside triphosphate pyrophosphatase)	3.95e-05	0.00039	16.17	830.69	168.76	948.94	840.97	833.17	795.64	764.86	828.22	797.46	822.72	788.29	853.1	1000.14	1052.58	896.15	957.22	908.21	744.56	756.61	719.47	715.07	751.65	772.83	857.15	839.09	927.6
1416461_at	Caprin1	cell cycle associated protein 1	0.00139637	0.00381	19.81	2949.65	645.64	3034.38	3064.12	3094.81	3389.86	2770.46	2775.41	2881.8	2649.73	2601.35	2621.38	2984.28	3892.64	3675.59	3582.31	3213.26	3326.67	2905.9	2778.67	3034.72	2770.01	2696.24	2704.01	2915.02	3119.42
1416462_at	Caprin1	cell cycle associated protein 1	0.000386253	0.0017	20.06	2249.9	504.53	2347.5	2406.43	2375.43	2482.27	2090.48	2002.37	2176.98	1811.63	1847.11	1881.87	2352.36	2820.68	2687.24	2727.91	2509.01	2481.98	2053.66	2156.03	2298.25	2201.55	1912.7	1974.09	2175.21	2337.36
1416480_a_at	ENSMUSG00000044330 /// Higd1a /// LOC100045763	predicted gene, ENSMUSG00000044330 /// HIG1 domain family, member 1A /// similar to hypoxia induced gene 1	0.000371208	0.00103	18.711	3168.32	525.83	3466.41	3190.99	3156.85	3077.09	3179.79	2983.49	2582.42	3126.86	3353.2	2948.62	3444.43	3572.78	3634.09	3318.54	3156.48	2722.25	2930.22	3055.39	2690.47	2842.52	3232.44	3293.02	3376.11	3417.77
1416481_s_at	Higd1a	HIG1 domain family, member 1A	0.000191653	0.000741	16.61	3975.64	950.29	4400.49	4387.64	4239.01	4194.32	3830.08	3641.73	3790.77	4002.31	3855	4015.12	4148.15	4823.92	5254.84	5086.14	5001.19	3812.23	3948.97	3815.84	3354.26	3786.85	3885.65	3912.59	3926.03	4026.02
1416496_at	Mrfap1	Morf4 family associated protein 1	0.000150971	0.00523	21.77	13192.8	869.35	14015.1	14112.1	13628.9	13213.3	13143.6	13412.6	13172.2	13223.4	12373.4	12757.7	12967.2	12964	13993.9	14064.3	13671.6	13322.5	13821.6	12871.5	13089	12632.3	12703.3	12984.9	12886.6	13322.8
1416497_at	Pdia4	protein disulfide isomerase associated 4	0.00487107	0.00601	18	699.78	366.95	898.1	799.63	730.21	808.79	640.14	519.1	800.22	595.02	632.72	575.06	692.06	1048.68	1253	786.64	783.32	852.97	707.5	596.54	655.95	642.4	593.45	645.57	648.45	826.13
1416505_at	Nr4a1	nuclear receptor subfamily 4, group A, member 1	0.00239048	0.0294	11.06	210.07	393.17	162.71	117.71	242.16	309.94	353.03	354.14	899.23	362.17	216.98	167.49	157.5	166.94	166.22	153.22	253.87	479.31	264.01	197.86	258.36	203.62	216.52	189.6	167.96	112.89
1416543_at	Nfe2l2	nuclear factor, erythroid derived 2, like 2	0.0230467	0.00363	17.316	507.68	147.4	578.33	534.35	506.72	541.97	496.06	436.54	421.92	599.45	508.65	526.29	562.71	549.29	471.31	388.2	404.26	341.36	375.91	438.7	346.29	481.54	526.92	636.16	557.76	604.87
1416600_a_at	Rcan1	regulator of calcineurin 1	0.000698046	0.00734	9.34	1135.5	473.54	1112.15	1057.4	999.86	1302.38	1375.1	1366.02	1923.35	1271.64	1157.91	1087.22	1099.25	1042.83	1065.84	1079.86	1134.55	1344.37	1217.35	1237.61	1244.23	1246.29	1136.44	1074.4	1000.49	976.27
1416606_s_at	Nhp2	NHP2 ribonucleoprotein homolog (yeast)	0.0136919	0.00412	9.7	738.07	146.91	740.44	714.06	694.32	735.69	744.62	834.52	777.23	878.69	809.27	826.41	667.57	584.86	712.49	711.06	604.37	599.88	830.4	795.41	819.73	726.89	774.33	824.16	659.93	653.36
1416610_a_at	Clcn3	chloride channel 3	0.00639236	0.0069	10.05	2057.65	400.39	1778.58	2002.31	2166.77	2067.75	1987.65	2047.54	2579.36	2195.44	2119.29	2184.87	2075.08	1945.2	2006.49	1963.97	2020.79	2156.15	2091.97	2106.85	2522.22	2405.15	2047.4	1971.36	1898.3	1906.66
1416616_s_at	Clpp	caseinolytic peptidase, ATP-dependent, proteolytic subunit homolog (E. coli)	0.0297757	0.00567	10.92	2999.02	446.48	3250.14	2862.93	2770.95	2720.82	2948.84	3280.77	3195.57	3539.19	3449.95	3274.02	2958.48	2903.83	3246.05	2727.31	2862.07	2646.23	3075.29	2970.45	2844.56	2895.97	3210.26	3288.06	3094.22	3027.58
1416636_at	LOC100047161 /// Rheb	similar to RAS-homolog enriched in brain /// RAS-homolog enriched in brain	0.0119088	0.00571	16.64	9735.78	1006.21	10064.2	9784.94	9794.31	9651.55	9442.26	9686.63	9625.58	9510.89	9614.03	9548.93	10156.5	11002.4	10018.7	9861.55	10431.4	9925.1	9897.39	9531.48	8989.96	9634.79	9591.15	9609.58	10071.9	9911.73
1416671_a_at	Mcoln1	mucolipin 1	0.0214508	0.00156	13.06	145.57	43.36	171.71	134.94	130.32	129.63	144.8	148.54	148.19	183.62	187.03	158.87	149.49	146.35	137.84	100.31	116.33	120.06	135.25	143.02	156.22	120.91	170.52	164.24	139.63	155.68
1416681_at	Ube3a	ubiquitin protein ligase E3A	0.000508491	0.005	21.33	245.16	124.58	258.26	382.98	280.48	244.58	259.91	153.78	261.74	133.82	193.33	186.48	270.99	317.94	289.68	271.18	313.37	245.74	179.85	228.87	168.46	201.46	188.61	210.85	203.94	258.3
1416684_at	Fbl /// LOC100044829	fibrillarin /// similar to Fibrillarin	0.0202285	0.0307	0.7	710.25	120.65	782.2	738.72	753.42	720.9	716.88	722.05	840.35	625.69	662.12	641.29	664.19	700.95	856.7	845.31	735.03	775.42	820.1	702.07	615.39	672.72	680.12	659.1	672.42	703.62
1416698_a_at	Cks1b	CDC28 protein kinase 1b	0.0103462	0.00349	10.87	306.27	122.76	296.13	262.05	265.24	226.45	220.76	252.88	342.7	370.54	329.51	337.92	306.9	466.29	392.13	305.64	333.65	288.28	250.99	260.96	291.8	267.38	340.27	349.17	327.85	318.59
1416703_at	Mapk14	mitogen-activated protein kinase 14	7.21e-05	0.000581	19.69	789.7	248.6	840.11	883.21	838.68	793.04	698.64	550.43	579.91	632.95	723.38	769.07	892.05	1047.64	840	929.95	791.78	835.61	740.74	717.95	787.62	761.13	690.54	750.45	965.15	939.1
1416705_at	Rpe	ribulose-5-phosphate-3-epimerase	4.4e-05	0.00327	20.68	541.18	250.77	653.04	650.57	610.9	680.5	580.24	539.56	517.35	416.24	509.06	438.03	633.72	870.81	610.44	713.98	657.18	619.01	520.51	486.93	369.27	424.16	440.63	479.53	530.27	542.8
1416706_at	Rpe	ribulose-5-phosphate-3-epimerase	1.43e-07	0.000671	20.04	235.34	82.01	316.53	298.81	266.39	293.98	229.99	207.28	232.24	183.56	207.23	207.43	252.39	331.84	274.07	347.58	273.07	301.09	236.74	224.45	193.38	187.79	185.31	208.4	233.93	248.97
1416727_a_at	Cyb5	cytochrome b-5	0.0050311	0.00934	22.24	4985.16	593.25	5385.2	4857.22	5072.4	5301.3	4886.42	5111.92	4575.02	4896.28	4964.72	4736.04	5005.61	5427.16	5223.42	5424.33	5087.24	4885.89	4891.88	4822.85	4240.66	4472.22	4790.61	5214.03	5033.92	5255.55
1416755_at	Dnajb1	DnaJ (Hsp40) homolog, subfamily B, member 1	1.28e-06	0.000552	17.494	3172.65	2609.08	4725.9	4021.86	3796.91	3193.8	2724.56	2595.01	3022.8	2785.22	2846.63	3443.84	5712.2	7637.3	4328.41	4292.05	4127.77	3151.49	2731.23	2419.14	2613.37	2858.37	2683.5	2981.2	5448.46	4925.92
1416756_at	Dnajb1	DnaJ (Hsp40) homolog, subfamily B, member 1	1.51e-05	0.000543	18.496	353.65	260.82	542.94	521.79	447.99	340.77	329.94	240.28	356.96	295.3	292.88	343.63	627.61	761.93	350.34	615.21	495.24	377.1	319.47	270.34	310.14	291.65	309.03	362.73	602.02	577.42
1416762_at	S100a10	S100 calcium binding protein A10 (calpactin)	0.00857073	0.00403	7.4	505.31	226.7	478.7	393.53	453.95	444.84	501.03	705.55	766.46	846.94	624.72	570.81	486.77	437.12	545.7	461.13	483.47	455.92	530.12	501.17	497.06	509.46	553.64	667.18	534.21	514.13
1416773_at	Wee1	WEE 1 homolog (S. pombe)	0.000894531	0.00156	14.72	433.6	160.14	476.51	391.45	392.42	414.14	396.79	421.97	506.32	427.62	515.36	494.36	540.08	608.6	427.16	329.24	288.32	351.2	372.33	423.56	458.3	497.48	439.58	481.45	496.76	492.1
1416788_a_at	Idh3g	isocitrate dehydrogenase 3 (NAD+), gamma	0.0181637	0.0224	5.7	5801.52	762.87	5796.25	5406.07	5534.89	5467.14	5622.77	5824.54	5976.96	5922.13	5719.79	5785.25	5547.67	4927.84	5309.73	5641.99	5276.24	5806.79	5836.79	6125.66	6255.74	6146.04	6191.71	6453.58	6147.65	5921.82
1416803_at	Fkbp7	FK506 binding protein 7	0.0224959	0.0264	8.96	130.51	69.82	117.91	109.47	118.35	120.92	127.13	176.98	137.98	185.74	164.51	166.02	150.34	118.79	99.39	99.24	93.65	151.18	129.78	158.37	150.76	119.27	131.23	233.29	124.39	134.88
1416826_a_at	Med20	mediator complex subunit 20	2.99e-06	0.000122	17.184	1632.6	491.37	1735.48	1767.02	1717.23	1693.8	1451.83	1292.94	1179.69	1416.85	1530.79	1571.35	1911.98	2162.44	2076.77	2046.75	1977.76	1755.87	1571.4	1534.94	1401.67	1343.77	1535.42	1356.32	1808.72	1739.38
1416830_at	0610031J06Rik	RIKEN cDNA 0610031J06 gene	0.0342772	0.0046	7	393.56	116.58	374.74	360.72	347.39	390.65	393.69	398.66	466.58	463.62	396.63	389.99	353.02	244.13	341.25	376.56	313.15	329.47	419.46	398.08	423.54	408.62	412.2	477.29	393.43	403.48
1416843_at	Pde6d	phosphodiesterase 6D, cGMP-specific, rod, delta	0.00114498	0.00233	17.474	1171.01	247.48	1395.5	1191.44	1153.84	1102.4	1169.6	1171.02	1121.44	1137.96	1152.27	1171	1212.77	1307.85	1365.58	1512.13	1337.27	1138.72	1212.01	1114.43	1034.42	1017.17	1164.9	1272.83	1294.16	1219.9
1416860_s_at	Ing1	inhibitor of growth family, member 1	0.0186208	0.0103	18	1189.52	245.88	1304.54	1220.57	1293.23	1174.28	1186.59	1097.52	1307.22	1047.87	1055.51	1071.14	1192.44	1531.28	1539.64	1259.99	1411.61	1278.01	1139.71	1109.84	1071.46	1201.05	1141.37	1155.97	1220.86	1177.21
1416912_at	Akirin1	akirin 1	0.000971795	0.000784	16.58	4634.81	2085.54	5702.57	5256.21	4629.39	4864.72	4229.79	4345.72	5008.57	3887.12	3987.37	4232.89	4882.04	7746.12	6310.58	7567.57	7317.79	5900.83	4482.71	3575.04	4177.07	4033.25	4182.15	4303.58	4880.37	4640.23
1416914_s_at	Mtvr2	mammary tumor virus receptor 2	0.00452597	0.00511	18	148.75	40.62	208.02	150.66	144.11	146.84	157.09	140.13	135.45	139.04	170.34	142.53	192.69	180.65	156.01	154.41	135.93	143.28	140.23	137.33	126.77	150.71	143.2	169.5	167.36	162.66
1416920_at	Rbm4	RNA binding motif protein 4	0.000310414	0.00141	18.267	127.62	49.48	149.37	131.11	134.9	140.42	104.44	106.54	125.54	105.06	124.27	97.18	137.35	187.66	131.54	165.89	168.75	149.57	127.59	118.39	99.51	88.7	99.67	106.24	127.64	144.99
1416925_at	Kpnb1	karyopherin (importin) beta 1	0.00728899	0.00102	17.732	307.52	84.99	307.03	351.25	307.99	302.74	291.25	227.72	287.66	307.05	290.76	304.23	321.55	364.98	341.36	375.75	397.69	327.42	294.28	320.11	257.71	285.25	265.27	349.5	316.82	330.79
1416928_at	Rbm12	RNA binding motif protein 12	0.000463103	0.0015	15.55	411.62	238.74	419.36	445.37	411.63	407.42	399.25	296.87	411.61	380.5	409.43	422.5	535.97	767.47	588.35	461.11	506.28	503.11	341.43	324.9	290	339.96	408.84	394.54	544.39	475.31
1416958_at	Nr1d2	nuclear receptor subfamily 1, group D, member 2	1e-07	0.000143	5.8	8083.46	4133.12	6522.83	7241.02	7927.89	8785.87	9516.81	9765.89	13436.8	9674.11	8784.77	7828.91	6958.33	5250.94	5170.5	5484.42	6414.02	8502.07	8239.02	9390.41	9627.18	11229.1	9015.11	7910.14	7047.36	6493.03
1416982_at	Foxo1	forkhead box O1	0.00774386	0.00445	16.62	110.92	70.32	118.81	126.4	124.52	117.2	102.23	71.54	145.94	101.97	87.39	110.01	95.67	203.51	186.06	170.94	184.66	127.41	90.98	62.87	75.42	105.19	89.45	96.27	111.83	129.39
1416988_at	Msh2	mutS homolog 2 (E. coli)	0.0291409	0.000638	15.92	417.71	166.65	450.46	421.41	435.8	416.9	339.32	294.21	407.4	375.57	355.82	378.01	426.14	504.63	627.51	552.72	512.49	480.96	428.26	386.56	433.47	414.25	361.28	414.49	418.52	392.03
1417004_at	Tsg101	tumor susceptibility gene 101	0.0337531	0.016	19.44	1337.86	180.51	1494.1	1424.98	1353.2	1302.99	1275.4	1244.55	1284.92	1313.11	1327.95	1319.58	1256.1	1368.97	1568.15	1356.43	1414.56	1207.12	1345.67	1332.44	1227.78	1320.07	1347.75	1356.84	1343.28	1386.01
1417027_at	Trim2	tripartite motif-containing 2	0.00248971	0.00597	20.81	4598.41	846.06	5125.54	5252.86	5205.13	5256.1	4413.29	4097.98	3563.97	4233.92	4393.18	4486.49	4628.75	4576.47	4941.4	4853.65	4800.47	4523.38	4620.35	4653.11	4408.94	4658.67	4206.27	4229.79	4196.82	4708.17
1417037_at	Orc6l	origin recognition complex, subunit 6-like (S. cerevisiae)	0.0335842	0.00837	13.95	493.35	81.41	543.6	463.5	472.26	481.17	476.79	494.97	495.43	514.51	544.34	566.73	593.26	491.73	430.44	440.42	478.27	478.47	475.42	502.64	486.7	501.5	472.85	526.05	542.01	519.27
1417038_at	40065	septin 9	0.000505495	0.000655	10.69	397.6	77.98	359.13	375.92	338.96	440.53	401.52	459.56	466.96	476.18	433.91	404.46	323.33	330.44	373.57	337.25	336.89	439.27	479.29	462.66	454.62	378.81	381.68	406.87	329.36	393.68
1417057_a_at	Lamp3 /// LOC100043444 /// LOC100045251 /// Ppid	lysosomal-associated membrane protein 3 /// similar to peptidylprolyl isomerase D /// similar to peptidylprolyl isomerase D /// peptidylprolyl isomerase D (cyclophilin D)	0.000579467	0.00231	20.22	3269.59	1016.26	3437.08	3797.59	3545.34	3171.17	3097.77	2632.06	2400.6	2857.97	2936.07	3109.99	3526.49	3157.41	4433.12	3358.91	3301.58	3515.85	3269.94	3318.03	2951.26	3100.88	2844.03	3269.24	3406.28	3651.9
1417061_at	Slc40a1	solute carrier family 40 (iron-regulated transporter), member 1	0.00220228	0.00241	10.83	131.49	41.55	122.84	131.95	106.61	131.03	134.38	152.57	150.06	171.11	121.45	140.37	125.73	142.5	89.85	109.69	118.56	126.25	154.98	172.95	147.36	152.82	154.04	127.1	126.24	118.74
1417083_at	Sec61b	Sec61 beta subunit	0.0202936	0.000566	11.12	3787.51	1153.79	3849.88	3379.67	3099.5	3281	3087.39	3391.1	4161.54	3924.82	4078.14	3927.94	3853.05	5050.24	4626.04	4288.96	3840.19	3430.71	3287.12	2988.82	2742.66	3075.4	3671.28	3780.3	3826.87	3794.71
1417101_at	Hspa2	heat shock protein 2	0.00381831	0.00529	20.11	1180.51	351.8	1354.38	1577.04	1317.36	1143.7	1227.79	957.09	1186.57	1164.04	1044.93	1162.18	1194.98	1628.23	1436.16	1124.03	1056.28	1345.89	1174.45	924.63	1034.56	944.37	1217.77	1165.03	1252.29	1559.84
1417113_at	Gmcl1	germ cell-less homolog 1 (Drosophila)	0.00273195	0.00446	20.22	981.91	152.53	1034.02	1028.4	1052.32	1048.35	946.43	821.77	819.69	826.94	924.64	968.13	989.36	1124.76	1082.74	977.77	986.04	1079.95	937.09	964.68	882.55	1014.9	948.52	851.01	1032.7	1015.78
1417116_at	Slc6a8	solute carrier family 6 (neurotransmitter transporter, creatine), member 8	0.000742856	0.00322	7.7	709.37	173.72	664.13	618.73	645.52	604.05	631.93	844.97	681.43	833.38	796.73	848.45	698.25	518.72	709.33	592.34	592.42	526.5	709.41	721.41	823.76	768.92	792.56	866.16	851.34	726.91
1417122_at	Vav3	vav 3 oncogene	0.00259538	0.00103	15.45	107.41	73.32	128	143.37	107.45	124.37	82.53	103.06	94.56	114.41	100.39	107.8	149.84	214.57	210.69	177.92	213.58	105.72	78.73	87.92	67.94	88.03	107.37	91.66	135.46	94.34
1417135_at	Srpk2	serine/arginine-rich protein specific kinase 2	0.00426066	0.00797	4	5514.77	1313.8	5120.57	6341.45	5589.39	5879.14	6808.97	6891.09	6301.57	6426.56	6473.19	6085.19	5827.14	4838.17	4632.9	4263.49	4317.7	4689.23	5637.56	5521.36	5126.49	5152.15	5484.95	5508.17	4835.08	5129.38
1417136_s_at	Srpk2	serine/arginine-rich protein specific kinase 2	0.0410997	0.00302	7.7	3269.75	896.88	3043.99	3685.49	3135.07	3510.17	3906.91	4086	3347.13	3783.04	3826.98	3559.29	3363.46	2526.57	2541.42	2292.24	2443.97	2735.13	3239.51	3419.63	2934.21	3030.7	3341.34	3299.99	2792.99	2978.31
1417144_at	Tubg1	tubulin, gamma 1	0.0131728	0.000249	14.16	577.45	362.64	741.63	608.57	441.75	450.98	417.48	464.63	694.69	515	531.5	577.3	648.91	1142.76	1090.35	978.37	960.72	677.96	577.61	449.73	467.83	500.96	511.86	561.37	659.53	667.7
1417149_at	P4ha2	procollagen-proline, 2-oxoglutarate 4-dioxygenase (proline 4-hydroxylase), alpha II polypeptide	4.74e-05	0.000964	21.57	363.36	121.59	415.2	377.07	369.78	354.97	359.3	300.3	334.63	249.28	306.82	293.69	367.42	412.12	492.46	388.23	386.85	474.32	370.26	293.98	271.4	298.52	320.68	336.26	391.16	435.28
1417155_at	Mycn	v-myc myelocytomatosis viral related oncogene, neuroblastoma derived (avian)	5.23e-05	0.000558	15.43	160.9	188.43	224.14	215.62	175.51	132.58	114.17	128.77	172.17	117.41	114.66	149.63	228.32	453.15	442.97	360.8	337.77	235.95	135.43	87.19	76.29	82.54	91.51	102.82	207.73	177.93
1417168_a_at	Usp2	ubiquitin specific peptidase 2	5.61e-06	0.000432	11.81	535.63	162.8	509.67	470.47	432.77	444.95	471.98	532.03	691.26	758.37	647.68	706.52	559.47	471.52	547.68	434.41	436.96	539.23	522.15	467.63	559.01	604.55	652.14	656.73	604.14	488.32
1417169_at	Usp2	ubiquitin specific peptidase 2	0.00250082	0.0172	12.83	252.07	57.13	221.54	219.46	199.63	211.99	233.11	217.79	310.26	269.19	295.72	309.7	251.42	256.59	279.38	205.44	232.34	251.46	247.03	217.43	268.09	252.84	313.9	265.24	257.71	252.68
1417177_at	Galk1	galactokinase 1	0.0211517	0.0231	12.87	181.48	40.54	179.87	155.67	165.76	176.62	182.14	197.04	200.03	202.07	209.1	169.13	162.35	180.67	142.97	157.52	147.65	197.48	224.05	196.34	180.5	206.69	191.85	184.26	180.81	203.56
1417190_at	Nampt	nicotinamide phosphoribosyltransferase	0.0206085	0.00334	15.41	262.84	91.25	287.46	269.96	273.88	276.28	214.52	203.7	280.07	247.41	255.73	225.55	284.42	386.2	319.55	300.1	297.83	299.42	242.79	231.85	252.12	217.97	241.21	208.82	252.64	278.28
1417201_at	Nt5c2	5'-nucleotidase, cytosolic II	0.0197589	0.00171	16.85	410.97	82.6	443.64	416.83	414.67	433.29	369.88	344.66	387.73	369.18	404.51	383.35	407.45	490.74	449.73	509.87	482.06	462.27	388.15	396.56	397.37	418.15	426.48	409.85	412.08	404.68
1417208_at	Amacr	alpha-methylacyl-CoA racemase	1.73e-06	0.000215	19.55	390.07	78.91	490.65	430.22	435.34	434.45	370.84	345.31	332.84	378.9	368.46	376.59	399.62	448.92	424.59	440.65	460.01	438.57	426.41	370.09	369.55	352.67	340.91	380.52	367.28	463.66
1417226_at	Fbxw4	F-box and WD-40 domain protein 4	0.00692517	0.00336	18.27	319.2	156.3	397.14	318.1	278.86	320.3	260.43	321	321.63	285.18	257.19	247.3	288.87	390.17	449.42	559.9	419.28	379.57	321.44	262.83	291.8	254.92	286.64	295.86	341.22	353.94
1417247_at	AI597479	expressed sequence AI597479	0.00141868	0.00517	18.753	533.31	43.6	577.46	573.18	561.73	529.36	513.95	490.3	512.9	505.98	570.53	519.81	533.57	571.26	561.26	572.94	574.31	535.12	490.26	532.13	505.61	533.06	521.02	512.87	554.28	536.21
1417258_at	Cct5	chaperonin containing Tcp1, subunit 5 (epsilon)	0.000582738	0.00245	19.54	6364.13	919.63	7334.62	6811.89	6834.36	6575.29	6314.36	5873.67	6019.87	5858.93	6093.39	5964.94	6420.37	6940.18	7680.28	6806.6	5931.32	6879.36	6415.72	6413.9	6257.33	5979.79	5841.01	6157.67	6050	6805.3
1417329_at	Slc23a2	solute carrier family 23 (nucleobase transporters), member 2	0.000945421	0.00804	15.47	751.24	141.15	729.13	716.89	761.05	748.49	696.33	751.42	779.15	764.72	812.17	812.36	785.67	723.44	707.94	698.59	691.48	674.17	702.49	788.29	956.47	871.76	816.78	816.58	751.05	749.82
1417339_a_at	Dynll1 /// EG627788	dynein light chain LC8-type 1 /// predicted gene, EG627788	0.00140787	0.004	18.251	20416.2	3532.6	23349.1	22458	21097.5	20755.9	20660.6	19093.4	17022	18812.3	21016.3	20424.1	22384.6	24087.2	22289.9	19812.5	18517	20356.2	20408.3	19496.2	18214.2	17352.8	17898.9	18334.6	20878.3	22060.1
1417355_at	Peg3	paternally expressed 3	0.0101153	0.00953	6.9	11162.4	2085.89	9001.59	12104.2	9646.68	12143.5	13054.9	13173.4	12938	10881.3	11196.6	11281.2	10715	10583.8	10507.1	10895.2	11543.4	11344.1	11786.4	11128.2	12726.2	10863.7	11881.9	10198.8	10411.4	10268.2
1417356_at	Peg3	paternally expressed 3	0.0322231	0.0385	2.22	4424.29	713.25	4099.14	5067.08	4381.62	4731.97	4816.32	4305.53	5053.97	3812.56	4285.14	4418.09	3869.82	3909.94	4667.32	4934.83	4853.95	5107.13	4537.08	4430.48	4536.48	4382.97	4485.81	4009.18	4194.2	3680.63
1417371_at	Peli1	pellino 1	0.00016616	0.000639	16.31	1132.79	304.45	1229.53	1211.93	1171.88	1135.95	1011.54	1009.05	1200.44	966.11	989.66	1122.88	1149.99	1543.28	1470.97	1433.38	1422.99	1241.79	1098	941.31	934.37	980.6	1039.14	992.4	1129.62	1139.69
1417390_at	Gpn1	GPN-loop GTPase 1	0.0307313	0.00189	17.727	876.77	138.66	981.48	877.79	845.06	834.63	767.9	810.65	744.44	815.75	862.93	887.53	861.5	880.3	1021.77	1014.87	974.41	947.84	869.8	875.75	872.88	868.64	918.33	915.96	920.02	905.68
1417430_at	Cdr2	cerebellar degeneration-related 2	0.00512191	0.00449	18.705	148.37	47.05	204.51	158.92	165.66	163.98	122.38	136.77	143.73	149.58	159.31	132.36	169.35	190.3	216.47	133.6	128.97	143.3	126.05	145.37	132.08	147.16	135.74	160.27	180.6	191.13
1417441_at	Dnajc12	DnaJ (Hsp40) homolog, subfamily C, member 12	0.0253291	0.00364	6.6	2115.43	596.98	1998.49	2029.02	2114.29	2170.94	2292.36	2230.69	2732.34	2159.4	2247.41	2244.04	2273.71	2052.13	1538.37	1812.11	1872.68	1897.42	2075.89	2243.69	1980.07	2453.85	2134.82	2116.56	1829.49	2019.31
1417442_a_at	Pex3	peroxisomal biogenesis factor 3	0.0115054	0.012	4.6	233.09	40.42	219.33	238.39	224.9	204.77	253.59	224.13	255.09	255.65	243.58	247.55	229.35	210.86	192.43	192.88	228.82	196.33	243.89	261.95	228.79	250.6	244.49	273.27	236.83	228.6
1417448_at	1810008A18Rik	RIKEN cDNA 1810008A18 gene	0.00166663	0.00258	18.239	364.32	82.46	405.27	360.61	443.24	322.63	304.34	283.54	359.7	373.2	366.74	364.36	404.9	384.62	364.29	406.1	373.68	343	278.33	314.61	323.89	339.4	315.07	376.77	438.34	388.58
1417465_at	Fnta /// LOC100046996	farnesyltransferase, CAAX box, alpha /// similar to farnesyltransferase alpha subunit	0.0130658	0.00453	20.68	2786.43	480.47	3194.33	2794.04	2873.84	2691.58	2556.84	2628.16	2536.76	2522.59	2500.79	2533.99	2685.9	2821.42	3461.73	3210.48	2843.25	2888.31	2778.82	2647.17	2978.71	2748.14	2652.84	2938.49	2925.16	3053.7
1417535_at	Fbxo25	F-box protein 25	0.00226964	0.00109	16.87	1789.51	196.57	1877.13	1928.04	1835.1	1786.95	1669.28	1688.45	1746.95	1764.17	1727.3	1825.64	1792.07	1885.38	1983.7	1902.49	1896.03	1975.24	1893.83	1602.93	1720.03	1780.75	1590.56	1686.48	1772.76	1829.65
1417549_at	Zfp68	zinc finger protein 68	0.00825192	0.00286	17.151	578.61	110	580.61	639.9	663.94	554.99	554.88	518.51	554.27	532.84	522.2	576.62	662.09	678.55	606.38	642.33	692.14	669.36	529.24	572.81	584.39	558.25	472.14	484.51	599.67	583.31
1417564_at	Med7	mediator complex subunit 7	0.0400173	0.00696	15.28	760.06	102.13	830.9	728.21	744.85	696.75	697.64	743.68	792.56	773.58	719.76	745.03	841.19	900.96	773.39	837.52	772.97	783.87	774.27	696.7	736.96	723.77	729.62	747.14	864.07	816.53
1417598_a_at	Fxr1	fragile X mental retardation gene 1, autosomal homolog	0.00312437	0.0159	20.6	1077.42	197.85	1334.42	1170.75	1172.33	1229.78	957.49	938.71	1081.07	978.41	979.39	1073.77	1114.26	1110.26	1032.46	1195.75	1028.34	1189.76	990.33	998.26	983.77	939.99	1003.81	1086.5	1092.18	1157.9
1417602_at	Per2	period homolog 2 (Drosophila)	8.16e-11	0.000112	9.32	591.57	724.7	218.21	219.57	240.36	313.67	562.88	785.04	1667.62	1088.7	975.92	1057.01	664.85	438.64	315.54	231.92	233.88	323.51	458.63	620.26	632.56	1001.12	1033.72	849.8	744.31	312.03
1417606_a_at	Calr	calreticulin	0.0142017	0.00726	23.75	6754.99	1503.8	7215.73	6858.76	7415.77	7116.41	6841.23	6449.49	7291.86	6294.77	5652.91	5556.23	6635.14	8212.07	7981.64	8563.84	6636.19	6880.44	6542.85	6736.66	6576.59	6320.86	6216.13	6591.06	6773.32	7547.53
1417609_at	Ube2a	ubiquitin-conjugating enzyme E2A, RAD6 homolog (S. cerevisiae)	0.0460336	0.0232	22.29	1420.42	193.17	1675.83	1418.85	1493.91	1550.3	1437.09	1446.95	1389.32	1289.49	1307.04	1355.9	1536.43	1411.09	1488.84	1422	1431.73	1408.03	1415.38	1376.83	1450.49	1289.82	1343.34	1389.67	1508.99	1612.1
1417615_a_at	Rpl11	ribosomal protein L11	0.036963	0.00828	10.51	14143.9	1636.17	13961.8	13693.3	13008.6	14556	14651.8	15842.2	15111.8	15730.7	15134.9	15252.2	14315.5	12569.8	13780.8	13620.8	13621.1	14294.7	14597.5	14029.2	14156.4	13541	14502.7	14131.4	13300.7	13782
1417644_at	Sspn	sarcospan	0.0267819	0.0164	6.7	211.66	63.9	212.46	197.95	215.52	210.86	188.52	201.4	193.89	291.96	244.27	222.15	194.83	164.16	202.12	192.45	176.26	179.63	184.62	226.38	226.39	239.44	240.37	277.97	217.54	215.37
1417673_at	Grb14	growth factor receptor bound protein 14	0.0051788	0.00647	19.15	1227.17	573.11	1406.22	1353.3	1245.33	1213.2	1010.78	1168.94	577.37	1410.94	1144.1	1202.06	1504.02	1723.59	1451.53	1480.94	1083.16	775.3	1053.33	1060.64	1241.13	975.3	1197.47	1477.61	1602.92	1605.95
1417681_at	Nudt21	nudix (nucleoside diphosphate linked moiety X)-type motif 21	0.0459998	0.0143	16.63	1480.88	110.3	1556.15	1489.05	1488.81	1445.7	1389.44	1464.98	1427.56	1478.68	1566.48	1528.52	1596.63	1607.2	1405.1	1386.6	1428	1437.72	1427.41	1438.73	1483.07	1490.47	1402.38	1504.04	1494.69	1542.77
1417684_at	Thumpd3	THUMP domain containing 3	0.00226158	0.00226	16.34	539.59	78.1	571.85	568.91	546.5	559.28	479.82	476.79	555.09	521.61	533.75	528.92	585.19	632.99	542.24	625.32	628.77	547.46	529.28	477.02	508.72	478.53	493.15	517.24	536.94	554.11
1417701_at	Ppp1r14c	protein phosphatase 1, regulatory (inhibitor) subunit 14c	0.00206681	0.000295	14.84	684.41	162.41	803.62	677.58	680.23	683.8	679.91	624.85	685.01	601.56	738.99	737.66	785.97	926.38	780.67	884.77	878.08	705.18	639.22	607.1	605.37	639.69	624.79	648.94	707.46	703.94
1417718_at	Eif3g	eukaryotic translation initiation factor 3, subunit G	0.0244654	0.0395	12.85	3624.78	632.09	3631.01	3272.14	3390.11	3417.18	3372.92	3634.25	3634.88	3643.17	3618.54	3711.32	3678.7	3423.38	2749.97	3421.41	3168.1	3314.28	3670.65	3573.73	4014.16	3815	3598.78	3701.83	3741.39	3753.01
1417719_at	Sap30	sin3 associated polypeptide	0.0117952	0.00146	12.2	412.69	201.95	382.4	420.73	399.89	354.9	413.7	285.91	488.71	366.64	449.16	595.24	527.69	672	444.98	482.77	517.58	360.23	308.31	268.1	280.31	358.17	358.71	411.68	467.52	423.51
1417740_at	Cdc37l1	cell division cycle 37 homolog (S. cerevisiae)-like 1	0.0211665	0.00871	21.27	444.6	133.56	522.53	470.93	544.48	504.85	452.25	424.1	351.76	444.54	409.75	425.92	541.22	577.31	446.14	426.62	380.08	416.79	384.81	364.89	463.6	359.67	403.74	444.66	618.89	580.7
1417749_a_at	Tjp1	tight junction protein 1	0.0383145	0.0147	16.3	2492.22	561.71	2257.15	2762.29	2350.69	2569.18	2499.8	2556.3	2342.41	2318.85	2269.06	2380.27	2527.55	3309.14	3090.47	2929.38	3175.45	2635.49	2456.98	2367.4	2488.41	2185.72	2227.53	2330.59	2857.86	2496.02
1417753_at	Pkd2	polycystic kidney disease 2	0.0191575	0.00194	14.78	393.12	148.4	406.37	394.45	358.35	394.99	370.02	379.36	416.82	366.23	354.55	370.31	391.79	586.45	633.5	594.65	513.42	475.86	390.42	336.7	344.02	362.64	354.88	400.31	438.83	425.68
1417766_at	Cyb5b	cytochrome b5 type B	0.0228418	0.000606	18.586	1311.36	404.95	1501.92	1376.98	1537.33	1383.29	1100.17	932.08	1175.82	1100.16	1080.38	1176.11	1144.45	1241.36	1738.08	1741.98	1564.36	1547.2	1383.58	1339.67	1375.25	1395.35	1247.98	1241.32	1244.49	1283.04
1417777_at	Ptgr1	prostaglandin reductase 1	0.00598263	0.0138	3.95	141.06	51.79	144.87	157.17	161.45	162.68	173.71	131.92	204.72	115.24	126.58	101.15	111.93	160.43	114.35	132.76	159.18	201.3	175.91	158.6	141.5	111.9	123.57	124.8	132.85	140.62
1417786_a_at	Rgs19	regulator of G-protein signaling 19	2.07e-05	0.000246	17.732	576.46	105.79	677	620.65	575.79	566.65	505.56	510.06	488.56	520.8	593.9	509.48	599.8	697.25	700.13	645.67	645.25	606	587.91	541.09	516.13	538.45	513.13	496.45	577.13	655.79
1417791_a_at	Zfml	zinc finger, matrin-like	0.0150622	0.0409	23.64	1708.45	250.81	1775.33	1814.42	1829.31	1952	1709.22	1707.68	1786.2	1588.47	1596	1677.23	1828.96	1879.66	2023.92	1673.22	1837.23	1791.81	1655.35	1552.85	1522.31	1664.91	1604.42	1524.44	1744.2	1665.02
1417810_a_at	Kcnb1 /// Pacsin2	potassium voltage gated channel, Shab-related subfamily, member 1 /// protein kinase C and casein kinase substrate in neurons 2	2.46e-05	0.00036	0.29	1805.29	379.86	1821.33	1945.44	2015.71	2058.2	1812.41	1798.17	1628.86	1476.43	1533.61	1414.2	1611.79	1878.93	2173.92	2121.96	1775.28	2103.36	1941.42	1930.17	1698.47	1623.08	1596.62	1687.96	1581.19	2001.25
1417818_at	Wwtr1	WW domain containing transcription regulator 1	0.000581052	0.00613	7.2	537.24	110.38	472.72	544.2	541.94	577	549.81	533.38	618.07	611.33	467.32	450.93	465.61	561.3	463.13	488.05	541.1	637.39	616.14	560.87	566.02	506.52	481.89	464.12	416.64	480.67
1417826_at	Akr1e1	aldo-keto reductase family 1, member E1	9.27e-06	0.000558	16.29	380.45	403.64	552.29	500.9	468.47	420.41	328.67	256.99	329.55	308.37	295.08	375.56	412.97	690.54	1064.26	697.03	695.12	466.69	394.75	298.64	288.68	276.83	267.46	303.8	355.21	385.35
1417834_at	Synj2bp	synaptojanin 2 binding protein	0.0131649	0.00469	15.74	439.92	146.11	510.22	445.71	458.81	470.44	388.99	385.19	473.86	391.16	393.99	444.82	503.11	667.09	429.15	528.45	518.74	498.26	435.02	374.87	380.06	404.58	380.71	417.98	420.01	471.62
1417839_at	Cldn5	claudin 5	0.00772711	0.00778	4.4	365.88	163.75	309.92	395.57	338.48	377.3	354.46	482.9	450.81	379.52	263.07	232.88	285.78	471.39	351.04	560.39	427.95	515.02	557.89	511.26	404.69	258.96	241.62	284.72	301.76	334.08
1417861_at	Ccnc	cyclin C	0.0498894	0.0224	16	184.48	54.04	191.47	210.11	211.88	219.83	156.07	147.15	185	183.96	192.5	158.41	219.3	230.19	217.09	207.56	246.36	187.05	154.46	156.93	165.63	159.75	162.44	138.29	165.11	165.9
1417872_at	Fhl1	four and a half LIM domains 1	0.046948	0.00516	19.4	5213.71	1028.62	5203.03	5010.31	4933.8	4906.43	4869.96	4791.21	5371.95	4451.65	4357.72	4644.49	4712.1	5696.5	5703.6	6414.95	6014.12	6343.56	5403.96	5160.31	5339.92	5355.45	5224.39	4847.8	5460.18	5520.83
1417888_at	Trim13	tripartite motif-containing 13	0.0325417	0.0125	16.65	377.7	76.77	408.45	444.4	434.34	371.49	375.3	323.11	376.66	402.78	367.78	415.63	378.74	450.88	476.65	417.36	451.5	345.69	323.26	352.16	383.2	351.37	337.75	364.63	379.4	361.81
1417893_at	Sfxn3	sideroflexin 3	0.0485084	0.0401	11.17	546.84	144.98	457.94	439.33	473.62	499.94	546.31	668.76	729.28	593.49	540.64	528.28	507.36	511.16	563.74	557.2	550.05	524.1	620.89	533.74	547.37	603.64	556.55	586.11	535.16	555.05
1417935_at	Mkrn2	makorin, ring finger protein, 2	9.08e-05	0.000183	7.9	554.71	102.49	518.19	494.84	514.56	555.31	563.4	598.66	619.05	649.98	619.29	569.11	514.94	452.1	562.46	450.29	445	458.88	508.31	554.11	605.56	610.18	601.04	564.22	493.95	515.9
1417941_at	Nanp	N-acetylneuraminic acid phosphatase	9.12e-05	0.000746	10.21	1541.5	313.07	1437.13	1421.4	1561.27	1407.98	1536.62	1661.98	1881.29	1642	1668.05	1733.33	1542.9	1520.07	1255.16	1342.53	1422.12	1440.56	1540.1	1655.06	1557.88	1793.03	1584.05	1620.21	1421.43	1507.86
1417960_at	Cpeb1	cytoplasmic polyadenylation element binding protein 1	0.0178351	0.0289	6.1	926.4	308.36	816.16	793.96	924.37	798.63	919.54	875.84	940.89	840.37	998.25	962.64	976.1	585.78	808.03	735.68	717.28	928.43	935.14	1110.01	1186.83	1202.51	1069.67	998.69	1013.74	917.87
1417965_at	Plekha1	pleckstrin homology domain containing, family A (phosphoinositide binding specific) member 1	0.00130911	0.000463	15.98	1727.21	623.52	1870.31	1828.98	1777.85	1655.14	1535.44	1581.85	1523.8	1433.39	1587.75	1646.87	1871.04	2680.42	2453.23	2604.12	2473.86	1997.34	1676.57	1584.46	1888.47	1553.88	1560.46	1652.72	1891.14	1905.29
1417974_at	Kpna4	karyopherin (importin) alpha 4	0.00148077	0.00259	15.6	2646.76	671.25	2647.64	2853.89	2670.23	2644.11	2760.3	2340.9	2214.15	2645.87	2650.77	2664.65	3200.34	3537.44	3001.52	2605.45	2844.01	2383.08	2263.15	2306.4	2194.93	2385.93	2326.67	2434.9	2723.81	2756.71
1418017_at	Pum2	pumilio 2 (Drosophila)	0.000942352	0.00265	23.35	1092.67	235.11	1070.82	1280.19	1187.03	1232.81	1102.02	859.4	1100.77	809.97	914.49	902.5	1103.2	1273.44	1086.02	1158.86	1139.55	1191.2	933.93	1018.61	957.09	1015.68	951.66	937.84	1099.32	1132.59
1418022_at	Narg1	NMDA receptor-regulated gene 1	0.00996447	0.0114	20.74	699.25	109.91	783.14	746.61	824.1	740.16	655.86	604.27	680.31	666.74	661.86	674.95	764.35	778.75	806.59	705.27	751.58	676.83	640.58	677.49	693.23	782.75	642.45	684.41	705.62	789.49
1418025_at	Bhlhe40	basic helix-loop-helix family, member e40	6.82e-05	0.000163	7	817.58	315.72	773.75	669	799.27	836.26	835.88	952.39	963.11	1010.9	863.53	772.54	763.76	523.84	556.78	454.76	471.04	648.39	876.05	994.83	1086.2	954.51	943.68	886.37	738.58	754.56
1418038_s_at	Dusp19	dual specificity phosphatase 19	0.00527786	0.0169	18.52	247.12	71.34	324.07	277.07	251.11	285.07	246.48	232.4	243.06	245.36	231.11	221.93	267.27	339.74	251.64	302.03	252.02	275.57	245.87	221.15	246.03	197.06	213.48	245.65	249.71	247.76
1418073_at	Acot9	acyl-CoA thioesterase 9	0.0120149	0.0236	16.55	588.06	166.49	590.17	508.05	553.65	563.6	538.26	479.39	549.07	616.15	652.15	648.41	673.09	585.96	411.75	443.3	459.64	555.37	605.81	600.22	697.24	676.32	583.72	744.72	622.87	614.04
1418083_at	0610009B22Rik	RIKEN cDNA 0610009B22 gene	0.00155429	0.00148	15.46	2959.1	468.88	3218.14	3137.15	2926.98	2842.49	2861.16	2952.84	3011.59	2853.28	2927.61	2965.36	3157.62	3587.96	3350.63	3223.43	3242.52	3152.13	2975.51	2661.77	2922.39	2703.82	2650.2	2931.65	2920.53	3177.88
1418097_a_at	Crlf2	cytokine receptor-like factor 2	0.00951152	0.0158	7.8	776.12	120.97	720.42	683.81	633.35	772.4	785.99	875.29	863.17	774.08	815.91	740.4	737.19	724.19	644.91	816.45	757.11	778.3	774.52	777.71	806.18	845.57	839.45	788.61	758.54	779.26
1418119_at	Rbm8a	RNA binding motif protein 8a	0.0335611	0.0118	13.03	1446.44	174.72	1450.9	1392.71	1361.07	1363.73	1340.24	1438.65	1520.45	1435.75	1407.68	1472.5	1555.81	1495.19	1603.53	1487.36	1376.99	1434.04	1441.99	1292.74	1254.09	1522.73	1460.5	1478.48	1501.44	1597.46
1418134_at	Slc25a46	solute carrier family 25, member 46	0.000239135	0.00022	17.452	4071.42	641.03	4100.36	4179.67	3984.9	4138.85	3597.8	3557.69	3661.26	3552.25	3876.43	3836.16	4306.06	4721.8	4419.02	4380.97	4504.48	4275.96	4153.54	4042.48	3439.73	3868.5	3810.35	3835.24	4117.75	4151.45
1418174_at	Dbp	D site albumin promoter binding protein	1.09e-09	0.000216	8	814.61	1070.05	461.95	437.93	446.25	731.73	1091.9	1693.41	2508.46	1537.94	1117.78	897.48	534.75	368.36	501.98	411.78	558.94	643.8	1003.95	996.9	1114.37	1219.49	1193.17	987.21	616.71	449.9
1418192_at	Mnt	max binding protein	0.00280308	0.00569	7.7	1078.28	311.65	1021.02	840.64	891.65	1108.08	1108.78	1217.63	1463.95	1136.71	997.8	1052.09	891.32	1078.89	952.98	1077.68	1027.72	1128.05	1060.45	1136.61	1176.83	1298.08	1184.56	1165.95	867.7	886.15
1418206_at	Sdf2l1	stromal cell-derived factor 2-like 1	7.11e-06	0.000924	16.93	480.62	336.65	715.52	538.7	476.04	530.56	379.97	390.94	444.33	357.66	449.39	397.76	612.42	1006.71	768.63	771.81	513.21	518.69	485.2	381.64	342.41	333.41	367.84	425.93	517.52	646.14
1418223_at	Sec11a	SEC11 homolog A (S. cerevisiae)	0.00621436	0.00152	17.47	1662.24	244.01	1816.85	1613.1	1557.44	1483.67	1473.34	1496.87	1553.24	1565.47	1500.21	1669.79	1648.54	1807.08	1944.81	1851.87	1750.09	1765.96	1736.67	1456.8	1673.96	1601.01	1654.68	1729.94	1783.47	1822.45
1418238_at	Ivd	isovaleryl coenzyme A dehydrogenase	0.0232906	0.034	18.25	478.82	100.01	508.49	455.23	477.08	435.59	411.83	397.41	420.22	458.51	430.27	484.13	511.08	517.76	597.42	547.19	480.57	468.91	454.94	464.56	537.66	519.73	472.36	522.51	514.85	539.23
1418253_a_at	Hspa4l	heat shock protein 4 like	1.84e-05	0.000684	20.82	1438.16	462.59	1952.64	1747.95	1683	1648.37	1449.38	1128.17	1256.45	1027.46	1169.74	1198.4	1426.94	1661.74	1788.88	1744.95	1361.36	1777.5	1520.83	1517.55	1425	1311.76	1134.57	1181.82	1314.93	1690.83
1418259_a_at	Entpd2	ectonucleoside triphosphate diphosphohydrolase 2	0.0177107	0.0156	9.6	480.75	115.41	464.76	493.69	457.06	479.47	477.87	500.94	465.63	588.54	544.8	529.01	468.07	407.91	386.16	443.43	426.73	421.75	551.12	482.02	616.99	479.05	526.74	529.2	493.4	505.57
1418319_at	Ufsp2	UFM1-specific peptidase 2	0.0361422	0.00915	15.47	1003.6	144.61	1091.3	985.14	1030.14	958.43	983.37	977.73	1018.07	1151.84	1057.17	1098.68	1001.5	895.57	960.24	862.61	888.9	946	991.15	972.69	1142.06	1105.67	1032.42	1033.94	1005.71	1068.97
1418326_at	LOC100047619 /// Slc7a5	similar to solute carrier family 7 (cationic amino acid transporter, y+ system), member 5 /// solute carrier family 7 (cationic amino acid transporter, y+ system), member 5	0.00568911	0.00282	17.388	579.09	113.66	592.56	511.67	503.48	459.98	477.38	476	543.42	602.92	687.31	656.5	550.28	651.52	660.34	552.25	533.53	472.75	565.62	633.26	659.81	659.81	671.31	605.1	603.56	530.32
1418329_at	Pgpep1	pyroglutamyl-peptidase I	0.000430604	0.00282	22.14	106.91	20.97	125	119.34	110.03	128.32	114.01	97.23	86.39	105.07	94.35	102.99	115.03	112.84	119.79	112.64	107.83	91.81	89.49	95.52	93.46	88.51	96.65	105.99	108.98	127.94
1418360_at	Rnf112	ring finger protein 112	0.0481362	0.0295	22.81	2655.37	653.6	2691.95	2325.86	2494.27	2643.15	2545.2	2645.26	2607.49	2281.12	2390.05	2208.43	2347.16	2204.22	3511.41	3336.35	3075.96	3320.79	3050.05	2749.89	3360.81	2753.14	2620.46	2722.86	2665.48	2750.69
1418370_at	Tnnc1	troponin C, cardiac/slow skeletal	0.0420877	0.0261	15.44	124.91	45.18	130.59	112.3	110.58	96.99	119.64	124.56	97.78	154.93	126.76	162.68	126.52	98.63	105.36	107.12	72.31	111.88	122.09	133.67	146.19	135.83	143.51	129.81	125.26	150.9
1418380_at	Terf1	telomeric repeat binding factor 1	0.00177778	0.00139	15.52	229.96	82.1	253.73	250.23	230.9	221.31	229.2	206.15	219.97	204.48	235.63	261.76	274.84	263.34	333.26	227.45	269.29	249.15	193.13	215.06	169.07	189.14	203.37	214.72	230.73	239.95
1418386_at	N6amt2	N-6 adenine-specific DNA methyltransferase 2 (putative)	0.00686013	0.00229	15.08	582.25	157.83	672.66	570.43	639.17	582.55	581.42	571.86	563.94	631.11	580.41	698.35	675.24	669.93	768.62	581.96	567.8	530.99	588.93	528.43	452.96	530.71	543.01	617.95	603.72	662.67
1418401_a_at	Dusp16	dual specificity phosphatase 16	0.000247278	0.0043	9.12	431.01	265.23	324.01	359.01	377.79	541.87	538.14	538.16	817.25	582.32	420.57	440.49	338.53	356.35	376.28	414.2	460.33	564.19	475.54	458.55	421.54	477.96	444.1	392.55	384.86	286.8
1418436_at	Stx7	syntaxin 7	0.0127134	0.0171	21.15	1961.26	259.67	2215.65	1998.47	2124.7	2087.01	1964.23	1817.07	1696.31	1723.02	1911.65	1871.85	1959.33	2041.86	2020.79	2059.6	1841.31	1968.87	1963.2	1946.39	2018.87	1858.8	1919.77	1878.4	1918.26	2035.06
1418442_at	Xpo1	exportin 1, CRM1 homolog (yeast)	0.00228838	0.000949	17.436	2238.89	716.81	2259.37	2407.33	2266.55	2457.56	1898	1858.39	2218.4	1780.11	1869.35	1901.42	2179.5	3213.73	3089.57	3043.03	2711.52	2796.99	2263.34	2143.81	2132.75	2157.82	1986.3	1862.39	2286.66	2336.43
1418443_at	Xpo1	exportin 1, CRM1 homolog (yeast)	0.00258495	0.00114	17.145	1443.68	585.16	1513.22	1532.06	1526.29	1594.74	1248.96	1155.4	1428.88	1120.48	1160.68	1182.88	1455.17	2115.27	2290.8	2086.16	1764.36	1910.65	1405.48	1329	1449.02	1389.49	1285.34	1184.2	1438.35	1459.32
1418526_at	Fusip1	FUS interacting protein (serine-arginine rich) 1	0.00013169	0.00144	18.532	556.79	177.97	627.73	625.66	596.45	602.32	516.12	447.83	555.97	481.83	493.56	447.24	611.97	791.35	655.85	673.01	636.71	699.31	537.82	515.96	435.4	519.66	480.93	488.87	557.62	577.1
1418527_a_at	Fusip1	FUS interacting protein (serine-arginine rich) 1	0.000108033	0.00708	20.04	261.56	98.03	310.85	371.28	277.71	311.28	259.24	236.66	263.89	180.94	249.14	256.28	274.73	303.4	281.25	356.74	310.67	329.03	202.97	218.61	197.9	210.65	175.22	181.38	222.57	269.84
1418545_at	Wasf1	WASP family 1	3.64e-06	0.000329	18	3033.35	652.91	3356.7	3338.77	3226.37	2941.41	2911.16	2810.62	2666.83	3012.7	2906.35	2888.88	3474.35	3765.63	3972.64	3308.6	3225.99	3054	2877.41	2944.43	2855.39	2778.62	3070.43	2959.53	3347.23	3321.97
1418546_a_at	Stambpl1	Stam binding protein like 1	0.00108885	0.00409	18.759	390.76	139.22	433.17	432.95	424.06	386.12	352.33	321.59	298.28	364.5	385.46	401.83	391.71	423.11	576.72	446.55	396.81	372.07	389.8	340.63	424.52	363.14	303.53	375.68	418.35	469.5
1418604_at	Avpr1a	arginine vasopressin receptor 1A	3.1e-06	0.000526	15.74	151.76	404.52	324.94	299.28	204.93	144.85	70.41	65.69	158.67	138.83	100.67	143.98	280.48	732.68	851.02	723.13	643.94	167.79	112.28	50.76	41.99	70.05	106.06	130.23	280.61	239.99
1418591_at	Dnaja4	DnaJ (Hsp40) homolog, subfamily A, member 4	6.73e-05	0.00111	19.29	238.72	98.93	349.35	285.53	277.66	254.23	238.52	200.23	233.66	221.4	177.04	228.58	216.9	341.96	374.91	296.26	258.51	297.27	248.99	201.62	216.91	199.67	238.92	222.58	222.41	281.55
1418603_at	Avpr1a	arginine vasopressin receptor 1A	2.15e-05	0.000555	15.43	395.58	691.11	633	627.44	456.09	368.21	167.6	161.9	422.96	345.53	280.7	329.88	612.35	1496.52	1527.87	1360.24	1411.62	456.77	230.21	150.55	145.65	215.78	231.73	268.53	529.59	587.1
1418647_at	Gnal1	guanine nucleotide binding protein-like 1	0.0196369	0.00923	6.6	679.75	151.4	688.58	606.1	649.1	637.1	681.6	669.13	578.44	716.94	756.82	695.2	677.89	490.79	554.06	520.16	469.72	525.89	637.62	723.49	772.51	767.27	688.43	719.55	703.98	697.44
1418659_at	Clock	circadian locomoter output cycles kaput	0.0127091	0.00653	15.43	1154.11	494.95	1312.8	1290.81	1135.92	1245.22	1062.8	962.82	1469.49	1025.66	1016.04	1058.56	1327.2	1921.77	1393.92	1523.07	1685.1	1284.68	940.61	987.35	945.5	947.93	961.08	931.86	1172.3	1187.3
1418664_at	Mpdz	multiple PDZ domain protein	0.0491901	0.0151	24	1612.55	318.5	1475.11	1745.96	1600.64	1828.19	1644.51	1377.14	1759.18	1327.49	1529.73	1469.8	1505.74	1890.87	1694	1802.48	1803.79	1951.49	1648.73	1730.83	1554.24	1468.86	1603.83	1314.5	1621.27	1580.27
1418667_at	2410002O22Rik	RIKEN cDNA 2410002O22 gene	0.0176551	0.0197	17.731	500.77	188.07	536.98	555.85	558.08	572.55	454.14	419.21	579.34	410.49	468.43	473.67	547.67	757.67	491.53	583.11	683.7	618.09	458.32	381.53	432.11	468.01	425.48	435.42	534.36	510
1418688_at	Calcr	calcitonin receptor	5.36e-05	0.000651	11.1	1549.86	932.4	1101.55	1308.11	1259.4	1757.56	1830.14	2021.86	2890.12	2128.31	1859.3	1497.73	1423.39	1090.3	1025.33	1399.53	1713.24	1861.32	1770.69	1842.42	1601.98	1479.61	1644.19	1449.48	1200.42	1390.55
1418700_at	Lias	lipoic acid synthetase	0.0042434	0.005	11.56	777.69	187.31	806.26	706.61	815.8	709.16	775.75	758.37	953.66	882.61	902.35	870.07	767.49	579.03	705.26	707.93	691.53	641.83	779.64	861.11	805.51	943.91	841.05	930.55	690.22	726.72
1418706_at	Slc38a3	solute carrier family 38, member 3	1.14e-06	0.000263	8	405.29	159.56	324.23	320.76	371.77	368.5	434.39	470.99	600.66	625.64	452.24	421.89	353.42	382.1	353.86	307.03	306.51	368.14	430.58	462.72	472.09	409.17	526.39	496.55	401.4	368.38
1418711_at	Pdgfa	platelet derived growth factor, alpha	6.57e-05	0.00155	18	698.66	569.16	913.62	855.44	736.76	695.82	653.32	612.58	421.1	715.55	616.74	675.55	864.76	1085.42	1559.42	950.79	869.28	601.28	675.6	615.6	701.5	610.09	631.18	694.2	868.04	943.45
1418713_at	Pcbd1	pterin 4 alpha carbinolamine dehydratase/dimerization cofactor of hepatocyte nuclear factor 1 alpha (TCF1) 1	0.00440861	0.0205	3.46	2075.69	279.85	2262.52	2118.41	2098.72	2074.16	2164.67	2092.16	2257.65	2064.01	1996.85	1955.74	1876.05	2077.21	2094.34	2312.4	2197.06	2395.76	2392.73	2054.42	1994.07	1836.05	1982.11	1998.75	1858.45	2054.7
1418754_at	Adcy8	adenylate cyclase 8	0.00125569	0.00536	1.5	308.32	90.33	320.43	366	304.29	350.43	346.71	310.55	297.63	306.1	286.63	251.66	202	260.02	341.43	382.67	344.74	316.35	326.58	370.64	319.36	282.96	256.35	282.72	221.95	286.34
1418823_at	Arf6	ADP-ribosylation factor 6	0.0222254	0.0129	8.85	670.59	93.79	711.3	676.29	649.51	664.89	631.68	761.93	719.31	753.32	743.74	681.73	728.72	680.96	762.45	602.29	649.28	574.88	583	598.44	617.47	629.12	628.06	683.22	690.12	591.91
1418899_at	Ufm1	ubiquitin-fold modifier 1	0.0119961	0.0138	19.91	301.97	69.35	389.09	322.47	333.43	335.46	291.28	250.39	299.25	301.14	309.08	252.77	345.25	364.74	293.2	354.2	297.17	313.4	298.41	294.32	259.83	280.55	265.01	329.63	302.79	350.17
1418901_at	Cebpb	CCAAT/enhancer binding protein (C/EBP), beta	0.00691029	0.00371	6.6	523.25	194.78	452.62	465.65	465.47	524.49	643.38	667.23	739.85	578.09	582.56	579.54	497.77	443.95	379.11	350.28	360.7	545.13	639.16	575.16	414.59	522.02	531.78	545.27	456.13	467.24
1418902_at	Chid1	chitinase domain containing 1	7.19e-06	0.000764	12.37	414.84	77.94	416.28	377.86	409.45	395.48	402.65	412.58	487.82	522.89	525.46	458.11	413.41	369.57	396.26	372.53	408.95	418.62	395.58	456.77	501.88	474.06	477.67	491.76	434.02	378.15
1418932_at	LOC100046232 /// Nfil3	similar to NFIL3/E4BP4 transcription factor /// nuclear factor, interleukin 3, regulated	2.46e-07	0.000203	16.07	148.19	202.26	265.32	206.02	148.06	148.31	110.74	110.41	131.16	97.99	112.3	191.98	244.81	392.92	478.97	316.77	240.65	177.87	126.2	106.58	74.45	82.79	83.01	142.46	221.16	216.3
1419024_at	Ptp4a1	protein tyrosine phosphatase 4a1	4.45e-06	0.00127	6.5	311.35	256.54	289.59	298.1	303.24	411.97	489.73	432.67	721.16	364.78	303.76	241.15	226.95	241.92	208.09	318.93	280.45	474.06	374.2	439.68	445.86	419.89	355.65	266.82	281.43	276.24
1419089_at	Timp3	tissue inhibitor of metalloproteinase 3	0.0238158	0.011	10.18	1763.19	499.42	1630.72	1731.32	1554.58	1710.2	1701.1	2048.94	2505.3	2141.09	1897.52	1886.62	1636.98	1751.92	1506.47	1579.17	1913.2	1803.36	1823.41	1673.71	1867.75	1774.45	1778.21	2054.66	1552.33	1559.56
1419163_s_at	Dnajc3	DnaJ (Hsp40) homolog, subfamily C, member 3	0.00156023	0.00205	18	636.69	254.98	677.75	694.25	644.28	664.96	483.67	459.38	714.22	488.69	549.49	613.88	629.09	969.34	842.7	795.27	735.41	748.15	528.7	540	565.01	605.16	519.81	578.63	715.65	742.47
1419181_at	Zfp326	zinc finger protein 326	0.0469085	0.00704	14.89	1361.31	351.52	1367.29	1341.52	1325.09	1361.65	1360.97	1184.26	1191.3	1228.76	1467.15	1317.94	1679.05	1561.61	1397.73	1537.48	1498.4	1433.79	1261.6	1366.75	976.01	1359.23	1217.92	1209.33	1465.89	1409.3
1419218_at	Vangl2	vang-like 2 (van gogh, Drosophila)	0.0107028	0.00774	13.84	104.1	50.48	101	91.67	78.58	95.67	92.63	111.96	110.17	162.55	179.54	144.72	106.5	85.68	144.02	82.61	103.23	87.29	92.66	104.97	155.89	117.17	120.54	125.26	88.83	87.13
1419247_at	Rgs2	regulator of G-protein signaling 2	0.0161223	0.00375	21.44	1410.73	491.55	1789.87	1664.88	1760.73	1429.47	1547.46	1264.39	856.05	1385.55	1370.71	1370.98	1625.92	1430.55	1839.15	1444.88	1209.71	1254.68	1333.45	1391.99	1310.74	1309.17	1383.48	1549.53	1565.73	1775.37
1419253_at	Mthfd2	methylenetetrahydrofolate dehydrogenase (NAD+ dependent), methenyltetrahydrofolate cyclohydrolase	0.00849747	0.00203	15.05	195.65	114.48	227.36	251.46	196	214.44	178.73	158.86	229.51	187.44	187.23	179.03	195.77	387.81	359.26	312.54	319.88	255.52	183.69	171.06	188.06	166.41	176.36	182.33	202.53	195.53
1419263_a_at	Adrm1	adhesion regulating molecule 1	0.0263123	0.014	15.24	442.07	87.3	505.68	451.71	365.1	371.99	419.42	457.92	431.92	493.01	507.75	489.7	463.83	414.67	539.69	412.84	377.1	387.49	434.08	420.97	450.06	396.75	495.07	525.76	473.13	420.37
1419267_at	Nfyb	nuclear transcription factor-Y beta	0.012218	0.00813	17.496	558.18	100.84	625.75	578.84	580.78	530.05	466.14	444.89	562.91	537.78	563.98	544.21	561.1	646.57	617.59	605.72	606.5	534.02	464.56	500.14	553.48	578.09	552.07	566.6	535.09	555.25
1419270_a_at	Dut	deoxyuridine triphosphatase	0.00615872	0.00202	15.46	804.26	299.54	961.41	862.5	787.07	868.3	789.75	835.27	797.76	800.16	880.97	806.76	847.92	1036.37	1135.65	1072.04	1050.25	801.75	798.55	761.02	536.57	698.91	771.17	773.52	783.79	856.39
1419273_at	C80913	expressed sequence C80913	0.00241059	0.00706	9.49	1235.13	362.61	1121.03	1169.87	1065.81	1237.54	1217.31	1554.06	1747.8	1287.85	1270.56	1188	1085.44	1207.07	1109.16	1323.62	1232.72	1283.23	1257.33	1335.35	1312.97	1363.16	1269.68	1171.43	1088.02	1022.58
1419286_s_at	Ift81	intraflagellar transport 81 homolog (Chlamydomonas)	0.0040783	0.000389	16.21	1413.66	527.27	1656.45	1563.75	1515.83	1436.77	1266.82	1143.54	1625.78	1116.35	1257.05	1209.79	1436.81	1958.72	2170.89	2027.14	1884.75	1928.49	1525.81	1390.55	1354.88	1347.54	1239	1192.77	1385.83	1351.56
1419299_at	2010012O05Rik	RIKEN cDNA 2010012O05 gene	0.0246707	0.00934	12.3	995.05	245.76	1002.65	957.32	958.88	874.18	995.5	1133.81	916.22	1274.26	1201.28	1122.95	994.6	791.36	955.54	819.3	782.73	840.03	1059.01	1073.35	1075.66	960.02	1025.54	1102.87	921.39	1026.04
1419360_a_at	Ss18	synovial sarcoma translocation, Chromosome 18	0.00377159	0.00183	17.184	1203.58	429.33	1225.92	1283.76	1226.66	1218.04	1079.59	933.71	1122.28	1158.44	1072.6	1009.3	1294.18	1792.37	1429.67	1591.26	1409.76	1358.51	1127.43	1008.08	1171.6	1189.11	1033.3	1171.42	1300.55	1270.77
1419367_at	Decr1	2,4-dienoyl CoA reductase 1, mitochondrial	0.0166198	0.0148	7.4	344.67	92.45	325.79	297.71	353.08	351.37	339.25	337.21	304.48	427.73	371.17	359.6	339.77	245.82	307.25	276.9	301.77	281.82	357.28	370.53	430.73	376.99	376.21	412.82	333.14	349.56
1419374_at	Wbp4	WW domain binding protein 4	0.0133989	0.00277	14.92	551.34	86.6	550.45	604.66	522.86	512.77	535.72	527.52	522.08	515.57	572.77	561.4	610.71	628.54	657.93	559.92	533.63	601.89	560.34	507.83	524.73	514.45	484.73	552.22	607.49	567.1
1419375_at	Wbp4	WW domain binding protein 4	0.000788929	0.000838	16.38	1209.78	139.87	1339.78	1260.26	1226.55	1181.56	1086.3	1112.64	1188.35	1197.75	1221.26	1155.89	1281.94	1329.29	1366.04	1313.56	1231.49	1216.61	1099.48	1121.54	1202.94	1142.66	1135.74	1112.52	1241.79	1224.92
1419377_at	Med9	mediator of RNA polymerase II transcription, subunit 9 homolog (yeast)	0.000226186	0.000858	18	193.65	66.01	284.49	200.2	228.76	194.39	157.08	152.46	179.35	185.97	192.92	187.06	219.89	266.24	250.81	246.96	222.06	190.21	153.47	180.19	176.23	208.07	178.81	200.48	191.09	210.27
1419385_a_at	Ubqln1	ubiquilin 1	0.0123114	0.00367	20.53	241.43	43.56	253.43	265.23	259.36	218.68	244.74	193.05	207.32	207.93	245.99	235.55	273.84	259.55	261	235.12	198.25	212.93	232.79	230.39	233.24	251.19	238.13	247.85	255.78	280.18
1419389_at	Pde10a	phosphodiesterase 10A	0.0468192	0.0154	8.99	262.42	168.74	196.6	263.25	257.56	255.32	372.57	385.61	478.13	269.05	333.47	261.59	233.4	265.97	311.98	140.66	215.93	269.11	239.97	299.94	352.98	324.56	204.53	194.51	159.92	230.11
1419402_at	Mns1	meiosis-specific nuclear structural protein 1	0.0119143	0.0107	21.36	113.66	69.54	135.36	133.01	126.39	113.82	133.79	42.59	139.09	77.97	84.16	84.73	93.19	181.66	171.85	115.46	113.49	168.84	128.67	83.87	64.73	67.05	86.78	95.17	105.39	162.38
1419417_at	Vegfc	vascular endothelial growth factor C	0.0154856	0.00257	13.51	127.12	157.11	130.99	203.2	119.45	99.07	70.6	110.66	195.32	111.59	120.98	130.92	168.2	380.57	313.75	257.82	327.48	123.33	99.91	76.85	66.36	97.14	108.14	133.99	140.13	131.49
1419470_at	Gnb4	guanine nucleotide binding protein (G protein), beta 4	3.64e-06	0.00036	8.64	784.44	442.45	646.22	675.34	668.58	770.66	778.46	1011.22	1419.49	1090.01	966.06	790.43	701.01	587.75	534.58	663.97	750.27	795.95	800.09	803.39	882.05	894.27	959.05	791.11	687.27	652.09
1419499_at	Gpam	glycerol-3-phosphate acyltransferase, mitochondrial	0.0384739	0.00328	4.7	1580.92	432.7	1492.39	1449.23	1571.09	1716.47	1589.1	1580.22	1423.21	1853.38	1581.61	1446.61	1374.23	1201.17	1242.3	1387.55	1369.54	1354.08	1606.33	1765.16	2066.57	1812.87	1716.39	1671.76	1699.17	1658.62
1419517_at	Cnih3	cornichon homolog 3 (Drosophila)	0.0191917	0.0257	15.38	197.26	161.65	270.12	254.35	189.02	258.88	227.81	225.64	205.82	262.29	180.06	145.53	186.8	304.42	415.95	334.22	369.37	204.54	188.48	122.94	146	92.65	131.39	181.52	189.99	161.59
1419522_at	Zmynd19	zinc finger, MYND domain containing 19	0.0105295	0.0111	19.6	255.66	76.77	331.71	331.42	296.31	244.53	235.02	182.13	256.99	213.17	256.83	251.44	293.94	330.16	239.17	264.57	255.23	259.52	216.34	214.86	178.16	256.09	231.94	276.95	218.8	258.15
1419536_a_at	Rela	v-rel reticuloendotheliosis viral oncogene homolog A (avian)	0.00307254	0.00466	7.2	301.2	74.49	253.64	251.99	276.32	296.31	301.26	315.63	322.15	368.91	303.06	301.13	256.81	219.93	334.38	238.91	244.46	239.61	325.53	313.16	315.8	326.93	307.34	318.51	273.77	274.23
1419543_a_at	Sfrs10	splicing factor, arginine/serine-rich 10 (transformer 2 homolog, Drosophila)	0.00293319	0.00542	19.43	2108.27	448.57	2277.75	2225.36	2219.05	1983.32	1965.75	1891.64	2011.38	2035.03	1846.62	2056.69	2419.57	2224.68	2733	2136.8	2205.31	2079.75	2057.7	1835.87	2063.81	2181.81	1976.13	2188.09	2375.79	2198.04
1419552_at	Echdc1	enoyl Coenzyme A hydratase domain containing 1	0.000143641	0.0181	21.71	856.65	188.82	1044.45	1052.66	1016.24	1028.37	875	808.46	814.97	812.55	858.02	746.13	855.28	859.21	1014.82	925.7	1015.55	945.14	793.84	873.79	675.01	788.8	792.65	786.88	718.97	830.58
1419601_at	Kcnj10	potassium inwardly-rectifying channel, subfamily J, member 10	0.00404714	0.00988	1.33	4036.91	326.65	4180.88	4192.07	4140.4	4410.44	4412.27	4167.03	4144.01	3972.22	3758.97	3938.24	3784.18	3979.21	3764.44	4044.56	4259.51	4029.26	4073.06	4158.66	4011.89	4212.45	3953.53	3919.89	3865.51	4005.24
1419640_at	Purb	purine rich element binding protein B	0.00610466	0.000909	8.49	595.32	155.54	598.01	604.05	508.14	573.57	666.21	742.78	587.27	773.76	745.47	724.46	589.06	564.66	484.86	533.69	468.06	462.68	621	570.64	619.21	592.64	685.47	614.6	631.36	561.42
1419647_a_at	Ier3	immediate early response 3	0.00183355	0.000741	7	285.15	156.76	239.72	233.1	274.66	283.56	303.71	350.82	260.22	315.97	354.83	286.74	287.3	147.84	143.61	126.23	98.28	151.57	312.83	357.59	411.81	360.45	331.83	368.39	267.57	237.22
1419657_a_at	Slc25a36	solute carrier family 25, member 36	0.0441155	0.0297	9.07	4736.32	624.43	3916.11	4556.39	4789.52	4496.17	4811.22	4734.33	5050.74	5096.4	4897.03	5164.97	4737.11	4397.99	4250.11	4707.75	4992.7	4676.48	4637.95	4950.14	4735.54	5131.51	4655.82	4780.92	4741.55	4526.31
1419765_at	Cul2	cullin 2	0.00020689	0.00178	10.57	310.17	93.07	240.6	296.1	277.15	316.91	277.25	303.44	354.12	367.01	347.16	332.54	277.91	237.55	293.46	284.54	331.83	273.81	334.46	423.7	414.61	396.71	366.77	320.69	273.26	243.72
1419766_at	Sik1	salt inducible kinase 1	0.000482799	0.0179	9.65	334.75	519.84	167.95	232.68	224.19	495.27	509.68	444.67	1202	360.53	284.54	181.14	231.85	355.63	162.33	326.7	370.76	579.83	435.44	418.47	336.75	433.76	332.76	184.67	205.69	180.56
1419803_s_at	Ccdc12	coiled-coil domain containing 12	0.0229321	0.00106	14.83	1241.14	389.65	1467.43	1248.09	1132.17	1201.79	1121.02	1198.38	1321.21	1255.49	1209.87	1211.68	1275.4	1586	1824.42	1701.23	1451.52	1234.18	1269.65	1045.13	1209	1086.07	1177.93	1227.77	1287.66	1313.95
1419821_s_at	Idh1	isocitrate dehydrogenase 1 (NADP+), soluble	2.62e-05	0.000899	18.267	1291.31	490.03	1382.3	1580.76	1431.94	1353.52	1336.89	1080.43	1044	1184.08	1305.81	1151.27	1288.25	1630.48	1883.26	1543.28	1861.74	1457.15	1177.29	1224.86	903.2	1050.73	1181.98	1125.75	1294.37	1285.28
1419835_s_at	Plec1	plectin 1	0.0128195	0.0317	14.03	441.62	166.14	453.03	387.07	375.11	420.24	429.98	387.56	433.93	518.66	449.32	481.76	341.26	384.36	309.32	350.3	368.16	456.22	494.02	478.84	641.6	479.97	510.46	467.14	508.48	402.06
1419874_x_at	Zbtb16	zinc finger and BTB domain containing 16	0.0332516	0.0361	14.63	105.91	63.3	99.4	104.8	108.19	102.51	94.15	93.32	101.54	108.07	136.47	168.24	200.53	94.32	82.92	73.93	106.05	106.34	98.94	91.43	105.77	106.09	115.84	160.81	199.67	109.09
1419922_s_at	Atrnl1	attractin like 1	0.000356031	0.00925	18.861	1578.57	594.87	1797.98	1898.95	1729.3	1757.68	1663.19	1634.39	1566.23	1444.2	1488.6	1345.78	1366.18	1721.95	1982.76	1965.63	2411.34	1590.21	1573.48	1583.65	1565.38	1312.63	1384.88	1427.21	1221.6	1410.05
1419950_s_at	Tnpo3	transportin 3	0.00428461	0.00233	18	1658.88	190.9	1880.2	1671.26	1641.39	1646.51	1526.73	1543.07	1674.62	1498.41	1642.25	1567.89	1774.42	1802.85	1826.77	1814.53	1681.88	1778.26	1565.62	1637.32	1740.19	1555.2	1581.29	1630.09	1786.91	1821.83
1419954_s_at	Zfand3	zinc finger, AN1-type domain 3	0.0357439	0.0109	14.4	308.71	103.05	337.19	347.67	305.59	335.77	270.09	306.74	341.88	344.22	303.06	277.63	324.51	334.77	438.14	427.8	432.87	311	310.67	291.07	232.05	258.72	271.14	289.71	292.96	302.46
1419994_s_at	D10Ertd641e	DNA segment, Chr 10, ERATO Doi 641, expressed	0.00226894	0.00339	18.735	935.11	160.47	1120.05	943.38	955.44	932.03	868.17	800.4	846.58	980.42	983.84	848.57	911.47	968.54	1024.64	976.78	961.49	919.43	861.08	877.22	836.76	799.1	884.45	977.43	938.2	999.16
1420008_s_at	Wwc1	WW, C2 and coiled-coil domain containing 1	0.00303859	0.0106	23.78	893.59	225.88	995.05	949.03	925.61	944.34	915.83	784.82	1034.97	725.02	742.18	730.74	772.92	1057.66	849.71	995.88	907.33	1159.52	938.94	879.85	822.45	793.48	762.09	707.77	810.8	968.52
1420011_s_at	Xbp1	X-box binding protein 1	0.00446526	0.000869	12.06	2799.16	633.03	2796.62	2711.31	2418.03	2555.87	2577.14	2403.15	3070.08	2865.56	3058.3	2801.71	3070.63	3383.71	3274.01	3005.42	2492.84	2599.89	2503.94	2521.65	2117.66	2620.98	2890.02	2847.98	3072.54	2837.61
1420048_at	C78859	expressed sequence C78859	0.000439811	0.0338	16.51	217.57	143.59	183.42	150.66	171.57	153.85	181.49	145.86	163.97	136.69	152.26	168.31	199.04	227.06	423.86	358.9	354.42	276.24	273.6	232.42	265.03	238.51	254.12	208.07	305.4	261.81
1420093_s_at	Hnrpdl	heterogeneous nuclear ribonucleoprotein D-like	0.0363385	0.0427	12.51	2424.77	589.93	1813.31	1813.12	1918.42	1712.15	1815.65	2295.43	2794.85	2454.68	2532.74	2391.07	2072.43	1798.52	2128.19	2453.24	2653.98	2478.1	2409.24	2524.22	2892.01	2884.57	2492.58	2452.65	2440.3	1940.54
1420365_a_at	Hnrnpa2b1	heterogeneous nuclear ribonucleoprotein A2/B1	0.00360303	0.00198	17.438	11632	2093.26	11422.7	12704.5	11620.3	11517.3	11643.8	11271.1	12254.5	10791.6	11008.1	10779.3	11679.3	13218.3	14494.5	13454.1	14413.5	13423.3	12102.6	11606.6	10308	10775.8	11120.7	11277	12139.7	11797.4
1420478_at	Nap1l1	nucleosome assembly protein 1-like 1	0.000395677	0.00495	1.88	2293.46	829.34	2425.5	2504.41	2241.02	2759.6	2449.9	2345.9	2818.11	2050.57	1822.94	1724.3	2040.88	2907.69	3066.54	3382.99	3153.69	3012.96	2402.11	2096.32	2064.91	1963.16	1864.56	1774.88	1899.32	2213.07
1420543_at	Dnajc28	DnaJ (Hsp40) homolog, subfamily C, member 28	3.5e-05	0.000399	18.78	121.72	52.29	160.24	145.13	151.19	136.3	99.04	77.57	121.01	97.99	107.37	106.76	126.93	155.07	182.16	173.05	168.42	138.59	103.27	83.86	114.4	109.8	105.72	101.83	122.42	134.77
1420548_a_at	2310008H09Rik	RIKEN cDNA 2310008H09 gene	0.0452138	0.0116	16.89	138.99	38.32	151.29	156.1	148.46	120.73	135.42	108.98	133.97	161.19	150.8	144.54	159.32	132.99	136.69	96.54	91.8	115.59	101.28	113.51	162.19	138.13	145.98	139.85	168.44	164.52
1420583_a_at	Rora	RAR-related orphan receptor alpha	0.0159626	0.0146	9.23	1142.32	1441.51	627.19	896.65	619.42	1095.73	1554.66	1958.04	3416.09	1698.32	1586.02	1601.08	873.32	1185.74	1066.62	976.37	1200.51	1143.22	1185.82	994.8	1015.84	1242.46	1548.56	1141.42	750.84	533.08
1420609_at	39879	membrane-associated ring finger (C3HC4) 7	0.0330271	0.00898	10.69	6436.28	1421.26	5233.13	6069.36	5304.37	6482.23	6326.07	6667.38	8075.64	6815.36	7076.04	6297.33	5818.1	6684.05	6126.86	6390.33	6837.24	7009.63	6605.07	7086.61	6255.17	6680.06	6676.45	6133.44	5925	5294.25
1420623_x_at	Hspa8	heat shock protein 8	0.000748574	0.00448	21.93	19630.4	4508.77	21039.8	21038.7	21049.8	20286.4	20359.4	18571.7	16360.5	17431.8	18334.1	18017.2	19764.5	19734.3	25378.1	21899.6	18409.7	18609.4	19750.5	19526.6	18725.6	17160.6	18163.3	18989.8	19891.8	20818.7
1420631_a_at	Blcap	bladder cancer associated protein homolog (human)	0.00350162	0.00802	9.38	4665.09	1505.97	4155.52	4125.96	4214	4524.94	4687	5680.61	7137.91	5588.58	4654.01	4993.62	4489.7	4613.1	4727.75	4476.53	4454.7	4971.93	4676.17	4701.7	5293.75	5046.19	5008.53	4590.38	4582.81	4373
1420634_a_at	Smad2	MAD homolog 2 (Drosophila)	0.0116568	0.00141	13.86	395.65	178.6	415.55	445.32	376.27	368.82	372.27	393.53	453.77	365.04	366.44	397.76	459.48	627.31	666.85	541.87	568.61	411.3	361.42	338.51	309.64	350.44	375.48	357.29	433.16	409.15
1420644_a_at	Sec61a2	Sec61, alpha subunit 2 (S. cerevisiae)	0.0102047	0.0202	17.72	227.54	75.3	227.26	216.92	238.57	199.07	177.19	160.94	176.92	162.39	207.29	199.79	225.11	282.34	311.54	283.97	219.01	274.17	216.24	261.35	231.98	266.01	227.82	243.28	248.64	241.91
1420772_a_at	Tsc22d3	TSC22 domain family, member 3	9.88e-06	0.00118	17.325	2175.35	1075.62	2177.11	2354.5	2408.22	1732.66	1570.31	1672.57	1424.55	2239.98	2576.65	3336.39	3273.91	1940.07	2198.26	1755.81	1740.21	1301.72	1472.42	1803.15	2041.31	2173.59	2525.51	3452.96	3148.07	2790.27
1420811_a_at	Ctnnb1	catenin (cadherin associated protein), beta 1	0.0143807	0.0029	17.412	18629.8	3219.18	18609.9	19289	19441.5	19170.7	17150.9	17753	19956.1	16412.6	16497	16848.7	18087.7	21485.3	21412.2	22850.9	22695.7	21351	18713.7	17981.9	19393.2	18649.7	17526.9	17675.9	18160.6	18511.5
1420827_a_at	Ccng1	cyclin G1	0.000249223	0.00163	19.01	2002.96	405.21	2081.45	2303.42	2197.81	1998.88	2003.43	1852.34	1974.48	1920.2	2002.48	1983.13	2180.99	2378.38	2100.65	2161.28	2287.11	2194.14	1976.91	1940.29	1567.97	1920.11	1870	1971.73	2064.25	2232.48
1420829_a_at	Ywhaq	tyrosine 3-monooxygenase/tryptophan 5-monooxygenase activation protein, theta polypeptide	0.00387287	0.00221	3.38	7020.46	701.08	7075.05	7116.88	7110.21	7385.14	7456.75	7630.27	7019.88	6940.8	6280.56	6240.4	6278.25	6900.66	7323.57	7642.57	7599.19	7034.02	7021.05	7150.99	6441.13	6656.82	6948.45	6968.04	6832.19	6806.36
1420830_x_at	Ywhaq	tyrosine 3-monooxygenase/tryptophan 5-monooxygenase activation protein, theta polypeptide	0.0128282	0.0488	4.2	12536.9	853.97	12751.2	12544.8	12836.3	13257	12658.1	13210.3	12952.1	12631.4	11719.5	11549	11730.9	12482.9	11734	12600.3	12810.3	12799.6	12376.3	12215.4	12528.9	12478.1	11962.5	12052.9	12195	12589.1
1420850_at	Crnkl1	Crn, crooked neck-like 1 (Drosophila)	0.0135765	0.00103	14.28	171.19	42.38	193.71	166.32	170.47	164.47	163.48	143.82	173.38	172.67	171.92	181.77	197.27	221.46	192.49	183.84	220.62	177.35	151.77	136.7	154.28	141.21	154.27	167.96	179.21	163.25
1420866_at	Zfp161	zinc finger protein 161	0.00959232	0.00152	16.03	431.16	83.66	499.15	480.17	455.75	387.99	387.63	370.01	468.96	396.2	419.61	437.11	456.13	537.1	511.27	459.23	487.4	462.13	431.39	371.65	402.27	429.47	369.78	397.84	419.56	430.94
1420886_a_at	Xbp1	X-box binding protein 1	0.0179756	0.00553	12.5	3796.51	869.48	3954.52	3449.14	3046.15	3566.01	3454.87	3315.16	4536.77	3866.85	3738.55	3780.26	4132.22	4731.43	4702.03	3914.33	3193.53	3355.8	3354.97	3265.17	2992.48	3812.75	4003	3974.58	3973.78	3992.25
1420936_s_at	Cpsf2	cleavage and polyadenylation specific factor 2	0.0444627	0.00284	13.81	272.76	151.9	307.82	318.05	273.34	285.36	230.95	237.42	340.51	248.57	272.17	269.94	345.13	484.24	359.23	360.82	359.42	319.91	240.67	235.24	246.08	235.14	180.43	244.5	235.57	285.57
1421019_at	1700021F05Rik	RIKEN cDNA 1700021F05 gene	0.0193574	0.0101	6.2	1113.92	170.5	1036.93	1115.2	1119.56	1085.37	1108.62	1147.43	1258.38	1150.27	1095.98	1032.09	1105.24	982.62	1030.58	1131.97	1086.41	1073.64	1228.54	1163.98	1323.63	1162.42	1112.65	1075.55	1120.3	1123.66
1421037_at	Npas2	neuronal PAS domain protein 2	2.87e-06	0.000332	16.6	131.06	93.64	172.74	161.82	137.78	137.02	109.02	107.64	86.07	99.51	116.17	124.96	143.34	209.66	266.58	174.07	167.28	161.42	138.21	97.6	98.87	79.29	89.81	84.44	125.09	141
1421052_a_at	OTTMUSG00000017637 /// Sms	predicted gene, OTTMUSG00000017637 /// spermine synthase	8.06e-05	0.000746	20.11	591.17	263.97	678.91	659.02	702.77	622.44	607	492.3	646.42	439.31	453.7	464.36	527.76	684.93	967.26	819.35	780.78	688.76	594.5	587.17	532.27	547.13	490.26	523.27	529.8	587.85
1421087_at	Per3	period homolog 3 (Drosophila)	9.37e-06	0.00367	10.71	348.91	203.95	263.62	261.27	230.06	252.63	277.12	369.64	637.95	453	449.78	430.5	352.69	442.9	294.36	311.64	292.39	318.89	321.5	307.79	405.45	499.9	498.83	398.36	437.4	345.14
1421093_at	Slc7a10	solute carrier family 7 (cationic amino acid transporter, y+ system), member 10	0.00766167	0.000889	6.8	540.55	196.39	537.31	452.4	506.37	519.9	625.18	629.96	466.81	680.94	619.76	556.6	491.51	288.16	381.86	387.8	333.92	381	543.79	622.86	616.84	606.81	628.14	606.27	558.42	526.41
1421097_at	Endog	endonuclease G	0.0079134	0.00303	4.1	359.88	91.06	367.48	317.7	353.88	319.24	361.8	351.24	422.17	418.91	369.49	409.76	347.83	240.05	273.44	268.48	269.52	294.58	379.26	379.28	357.96	406.39	367.02	388.7	339.09	390.88
1421115_a_at	Zdhhc16	zinc finger, DHHC domain containing 16	0.00779923	0.0481	15.07	377.84	79.92	363.55	296.15	339.26	331.61	325.76	369.43	378.8	374.05	386.53	390.08	405.42	376.88	336.71	384.02	369.69	375.03	386.56	410.21	455.99	445.98	435.45	419.93	396.86	350.18
1421137_a_at	Pkib	protein kinase inhibitor beta, cAMP dependent, testis specific	4.11e-05	0.00102	16.87	1864.48	1752.92	2463	2709.55	2004.3	2101.58	1937.91	1745.14	1959.24	1405.16	1335.07	1290.7	1963.84	4136.51	3662.83	4256.45	4113.55	2669.71	1779.55	1120.53	750.62	1035.74	1174.1	1097.22	1576.94	1791.06
1421138_a_at	Pkib	protein kinase inhibitor beta, cAMP dependent, testis specific	3.97e-06	0.000887	17.442	787.49	1057.01	1244.35	1288.55	879.6	975.93	728.87	677.9	878.51	510.41	494.76	563.28	752.74	1540.86	2511.3	2268.21	2027.54	1286.25	822.24	508.66	397.27	463.04	481.98	482.73	704.37	843.39
1421260_a_at	Srm	spermidine synthase	0.00478935	0.00599	13.52	872.44	193.96	975.47	726.35	805.63	783.33	794.02	883.3	829.94	983.7	971.41	873.22	927.99	765.77	867	751.72	595.78	605.21	871.65	858.52	876.26	895.05	936.76	958.29	982.8	951.75
1421297_a_at	Cacna1c	calcium channel, voltage-dependent, L type, alpha 1C subunit	0.0117206	0.002	16.03	162.91	90.06	190.61	203.76	137.96	180.49	174.36	106.26	163.64	162.49	152.56	140.37	163.18	285.44	286.39	236.54	241.05	178.65	146.2	112.64	156.12	140.35	161.52	145.34	162.63	172.68
1421305_x_at	Rabep1	rabaptin, RAB GTPase binding effector protein 1	0.000491976	0.0053	19.54	261.91	64.13	339.26	279.33	280.17	266.13	226.63	263.02	217.02	215	231.45	247.98	272.9	273	276.49	277.72	270.95	260.79	256.25	223.69	265.72	240.94	211.01	215.41	252.33	279.93
1421340_at	Map3k5	mitogen-activated protein kinase kinase kinase 5	0.00313839	0.00137	14.78	442.96	375.99	507.28	510.52	392.83	490.97	364.22	370.17	527.74	367.85	408.57	420.25	524.52	1005.33	1019.76	840.42	896.83	638.05	380.98	299.08	309.59	267.79	404.14	372.54	524.85	465.66
1421350_a_at	Grip1	glutamate receptor interacting protein 1	0.0152439	0.024	10.8	218.59	40.04	184.07	208.4	201.07	190.64	216.84	250.98	218.8	221.31	232.67	226.99	196.86	241.69	190.57	203.56	214.82	196.15	242.8	231.61	264.14	251.66	228.6	225.05	194.65	218.39
1421354_at	Prkg2	protein kinase, cGMP-dependent, type II	0.00115655	0.00132	14.73	136.64	247.39	251.78	216.67	141.1	173.94	114.34	117.92	209.18	127.05	111.14	115.37	184.78	544.88	370.64	451.66	523.88	211.94	132.17	56.16	50.1	69.34	98.37	86.7	126.24	157.74
1421375_a_at	S100a6	S100 calcium binding protein A6 (calcyclin)	0.00654376	0.00166	8.2	521.12	250.45	507.59	448.87	510.46	471.02	654.25	611.19	672.63	850.05	588.77	552.57	503.53	455.88	349.15	389.48	453.78	440.01	634.38	503.54	507.05	531.77	691.21	690.68	612.67	579.21
1421391_at	Vipr2	vasoactive intestinal peptide receptor 2	0.00200481	0.00243	15.01	202.39	373.11	304.54	343.33	179.23	220.85	171.61	160.36	406.57	117.09	123.79	178.37	230.24	651.94	603.87	815.69	780.57	437.92	226.03	92.89	69.47	92.98	135.53	138.04	258.31	183.92
1421450_a_at	Map3k4	mitogen-activated protein kinase kinase kinase 4	0.00225512	0.00407	18.512	628.33	157.8	663.31	653.52	615.14	665.5	567.74	551.24	610.54	557.64	569.55	669.48	640.99	674.25	866.84	769.61	696.24	629.28	612.09	575	607.9	627.39	618.7	600.51	752.25	665.06
1421487_a_at	Nck1	non-catalytic region of tyrosine kinase adaptor protein 1	1.02e-05	0.000955	20.46	501.33	140.76	611.99	546.13	631.34	526.59	496.14	440.67	458.37	469.19	460.68	491.11	492.45	522.47	706.99	621.91	595.68	528.08	506.52	425.46	465.65	465.77	454.48	479.9	533.54	517.46
1421498_a_at	2010204K13Rik	RIKEN cDNA 2010204K13 gene	0.0449917	0.00766	6.1	3770.57	1310.69	3744.21	3489.83	3534.19	3737.83	4179.55	3940.62	3571.72	4253.34	4035.4	4077.84	3516.75	1997.24	2204.59	2441.19	2000.53	4000.95	4618.61	4352.39	4250.42	3796.93	4084.04	3721.84	3493.14	3853.77
1421528_a_at	Med22	mediator complex subunit 22	0.0168774	0.00254	14.88	484.41	82.76	514.83	525.88	492.58	480.44	488.38	456.05	462.18	472.65	508.52	533.64	530.3	574.5	529.22	572.95	580.61	427.51	479.21	465.87	415.09	473.67	453.87	478.8	455.27	493.76
1421529_a_at	Txnrd1	thioredoxin reductase 1	0.0207075	0.00363	16.27	1072.06	523.3	1204.31	1175.71	1095.88	1097.44	1017.59	843.47	1394.18	941.34	905.53	1004.66	1040.44	1389.23	1890.07	1556.96	1661.96	1321.08	1051.34	1002.56	880.75	1078.13	983.8	1052.11	1065.98	1155.3
1421738_at	Gabra2 /// LOC100047443	gamma-aminobutyric acid (GABA-A) receptor, subunit alpha 2 /// similar to Gamma-aminobutyric-acid receptor subunit alpha-2 precursor (GABA(A) receptor subunit alpha-2)	0.00560291	0.0484	22.47	116.88	36.06	132.7	146.78	160.84	136.11	134.68	113.12	96.58	90.19	101.3	115.83	117.93	128.93	161.99	129.26	94.79	132.62	105.06	114.82	126.26	101.21	93.75	89.87	105.54	122.89
1421756_a_at	Gpr19	G protein-coupled receptor 19	0.0123847	0.00733	10.29	681.16	222.79	677.99	625.73	632.51	697.22	832.77	771.06	988.14	690.37	622.85	619.08	596.98	694.8	692.87	743.75	758.97	755.63	831.01	684.32	632	613.8	633.85	562.13	542.55	564.92
1421817_at	Gsr	glutathione reductase	0.000214772	0.00107	19.18	337.92	60.31	398.73	358.44	342.5	336.06	307.57	313.52	278.11	298.74	345.13	333.27	387.69	381.97	378.73	333.8	373.22	336.93	303	327.86	319.48	312.24	361.68	348.54	356.67	338.91
1421819_a_at	671392 /// Set	predicted gene, 671392 /// SET translocation	0.0167166	0.00702	17.448	3297.89	1232.83	3705.89	3707.65	3439.02	3498.87	2977.84	2524.05	3496.08	2598.68	3141.51	3209.69	3271.96	3721.44	4989.71	3915.26	3842.61	3395.8	3042.17	3245.66	2995.85	3609.61	3040.51	3074.52	3126.12	3323.81
1421828_at	Kpna3	karyopherin (importin) alpha 3	0.000585528	0.00041	20.05	406.36	136.5	492.6	543.03	463.24	430.52	345.14	270.02	344.53	281.69	377.86	363.25	433.19	477.76	407.94	502.2	483.93	512.98	366.21	411.38	386.8	404.78	352.07	388.38	385.11	467.3
1421833_at	Pip5k1b	phosphatidylinositol-4-phosphate 5-kinase, type 1 beta	0.00363247	0.00303	17.148	142.72	63.94	184.57	179.26	135.98	151.14	157.29	117.79	123.55	109.05	133.29	142.63	153.75	152.4	236.94	163.77	165.48	142.81	187.62	120.18	127.16	120.61	118.92	109.37	118.9	149.53
1421834_at	Pip5k1b	phosphatidylinositol-4-phosphate 5-kinase, type 1 beta	3.3e-05	0.000349	17.732	226.53	95.72	282.56	279.46	222.23	265.64	200.89	179.25	198	183.37	214.37	218.34	248.4	307.98	366.23	270.93	263.06	225.35	228.79	227.72	222.21	174.79	193.7	193.15	229.3	261.64
1421840_at	Abca1	ATP-binding cassette, sub-family A (ABC1), member 1	8.27e-05	0.000515	6.8	1787.12	465.15	1362.07	1778.75	1627.18	1911.03	2035.03	1828.21	2213.9	1956.7	1795.5	1814.19	1477.07	1575.85	1283.59	1608.93	1852.33	1571.96	1660.59	2038.58	2132.65	1924.11	1941.39	1730.36	1697.42	1354.73
1421847_at	Wsb2	WD repeat and SOCS box-containing 2	0.020793	0.00464	4.7	3125.63	384.1	3219.32	3026.6	3109.84	3245.89	3137.93	3250.46	3226.99	3397.02	3368.83	3085.13	3096.91	2901.58	3096.92	2804.13	2757.38	3035.08	3068.14	3191.19	3525.58	3219.39	3113.33	3363.39	3072.69	3189.89
1421876_at	Mapk9	mitogen-activated protein kinase 9	0.00338282	0.0117	20.55	135.66	37.3	193.7	191.23	179.21	143.59	134.35	126.7	136.52	121.71	123.21	142.11	152.28	193.38	119.1	159.76	158.65	134.81	124.33	126.56	123.59	132.67	122.82	141.7	132.74	168.06
1421877_at	Mapk9	mitogen-activated protein kinase 9	0.00010145	0.00128	18.262	406.46	162.67	439.59	426.83	440.57	471.19	380.01	356.6	377.03	270.93	378.8	397.75	457.55	596.28	557.29	484.03	492.3	423.98	364.83	355.15	363.57	346.67	360.31	355.23	417.86	415.16
1421928_at	Epha4	Eph receptor A4	0.0028305	0.00714	20.45	100.77	60.49	126.23	131.01	127.02	121.81	112.94	68.25	99.25	47.5	80.95	84.24	112.89	152.96	168.48	131.85	113.33	106.27	62.14	87.47	97.94	91	84.08	78.79	79.27	102.3
1421929_at	Epha4	Eph receptor A4	0.0186505	0.0248	16.3	423.88	167.91	468.81	518.04	491.59	467.35	395.57	418.05	488.17	372.86	367.57	397.54	447.46	682.27	615.52	523.63	515.58	429.7	378.49	359.85	463.66	386.25	346.45	369.02	388.9	414.39
1421965_s_at	Notch3	Notch gene homolog 3 (Drosophila)	5.03e-05	0.00492	12.05	131.92	44.09	99.15	114.53	100.47	125.39	131.73	112.83	150.73	187.32	163.7	187.26	129.76	122.15	106.39	126.35	144.42	110.95	132.1	153.4	164.89	162.78	182.97	161.45	151.19	124
1421970_a_at	Gria2	glutamate receptor, ionotropic, AMPA2 (alpha 2)	0.0356727	0.001	18.54	5320.82	997.39	5474.38	5322.88	5254.72	5185.79	4707.73	4528.51	4484.54	4574.91	5015.83	5029.3	5318.75	5756.73	6479.31	6151.77	5765.47	5965.53	5459.14	5205.19	5765.69	5570.83	5091.97	4949.96	5695.18	6119.89
1421971_a_at	Mrps34	mitochondrial ribosomal protein S34	0.0218231	0.0059	13.52	2380.75	447.81	2543.72	2217.22	2231.34	2234.11	2278.93	2323.33	2380.4	2645.33	2522.87	2629.52	2350.4	2168.13	1749.7	2293.88	1923.34	2142.92	2430.98	2442.41	2437.47	2425.38	2503.8	2615.21	2381.1	2409.73
1422031_a_at	Zfand6	zinc finger, AN1-type domain 6	0.000715819	0.00523	17.717	735.59	445.34	1147.9	1019.53	864.4	871.36	738.3	732.88	1027.39	580.98	651.83	564.7	693.68	1037.31	1402.25	1215.72	1254.46	930.88	834.34	635.69	511.57	632.76	593.01	640.09	521.51	666.92
1422264_s_at	2310051E17Rik /// Klf9	RIKEN cDNA 2310051E17 gene /// Kruppel-like factor 9	0.0403196	0.0011	7.9	476.92	169.4	431.49	526.12	470.78	505.92	463.94	529.15	547.4	627.65	640.47	693.83	573.76	397.76	374.22	401.71	455.65	355.04	419.37	426.77	391.22	483.06	540.58	680.17	535.31	429.18
1422433_s_at	Idh1	isocitrate dehydrogenase 1 (NADP+), soluble	0.000143312	0.000804	17.722	2250.33	626	2693.35	2551.08	2544.56	2409.06	2065.16	2207.51	2121.91	2339.76	2083.26	1971.77	2225.54	3115.65	2658.79	3107.8	3223.77	2726.28	2270.64	2085.55	2045.42	2022.5	2131.89	2035.83	2230.01	2361.39
1422438_at	Ephx1	epoxide hydrolase 1, microsomal	0.00140408	0.0136	8.75	334.59	115.81	368.43	309.57	302.89	289.01	332.86	336.32	329.7	430.88	395.35	361.6	291.41	289.66	287.66	278.34	265.66	297.31	330.35	343.99	360.09	376.98	386.17	497.28	361.47	358.51
1422464_at	Mrpl3	mitochondrial ribosomal protein L3	0.0119567	0.0319	14.33	1091.23	110.85	1080.94	990.69	1015.72	1006.18	983.03	1106.86	1086.31	1186.92	1189.95	1103.27	1141.7	1103.73	968.25	1126.43	1038.24	1061.67	1113.6	1093.89	1086.38	1176.17	1088.57	1095.17	1146.46	1083.03
1422467_at	Ppt1	palmitoyl-protein thioesterase 1	0.0202993	0.0343	16.71	1222.88	184.28	1340.76	1188.46	1216.74	1136.44	1166.22	1083.86	1197.3	1350.86	1231.15	1273.08	1216.42	1138.42	1187.76	1110.56	1035.63	1072.89	1229.02	1264.2	1310.79	1280.46	1293.42	1404.2	1309.67	1363.15
1422477_at	Cables1	CDK5 and Abl enzyme substrate 1	7.44e-10	0.000163	17.767	465.9	129.77	515	519.53	459	422.39	347.37	339.32	375.35	471.87	531.15	477.89	598.86	551.91	518.55	451.21	441.91	375.01	368.45	357.61	413.76	459.94	474.66	528.56	597.63	574.61
1422516_a_at	Fibp	fibroblast growth factor (acidic) intracellular binding protein	0.0233499	0.0371	11.97	435.77	95.52	445.2	353.89	355.34	358.59	397.15	451.93	442.89	517.63	461.56	460.32	388.29	326.59	489.72	346.24	359.81	363.36	465.01	448.32	390.66	441.65	502.89	475.31	429.89	408.61
1422528_a_at	Zfp36l1	zinc finger protein 36, C3H type-like 1	0.0425156	0.0162	6.7	149.14	48.03	124.19	131.54	157.75	153.97	203.37	188.78	203.89	150.14	157.95	128.69	151.75	134.51	128.43	107.83	171.77	143.05	152.99	147.53	148.15	154.05	151.89	144.71	137.61	143.28
1422531_at	Syt5	synaptotagmin V	0.000549858	0.00121	8.64	313.77	137.95	328.58	282.76	197.51	256.49	350.59	406.56	473.4	426.7	396.49	347.3	278.05	247.76	307.04	225.83	219.5	240.17	322.87	301.9	319.48	320.59	381.34	380.07	308.06	294.35
1422533_at	Cyp51	cytochrome P450, family 51	0.00124737	0.00384	16.94	503.32	178.02	574.95	605.36	622.71	472.54	480.54	423.33	439.15	501.02	489.14	576.6	698.53	708.14	505.61	602.15	640.36	518.08	494.53	457.43	352.11	491.12	473.71	461.28	576.76	511.62
1422537_a_at	Id2	inhibitor of DNA binding 2	0.00166817	0.00745	8.25	1783.24	805.71	1723.27	1903.48	1843.2	1882.29	2126.36	2847.94	1975.59	2244.95	1517.47	1334.47	1236.52	1334.8	2195.47	2079.37	2254.51	1655.92	2252.89	2224.34	1685.02	1412.23	1497.72	1587.29	1328.4	1377.19
1422544_at	Myo10	myosin X	0.0115392	0.00344	14.4	272.8	300.82	318.46	352.12	233.94	269	276.6	237.49	346.06	217.47	254.64	231.23	282.23	500.17	774.94	535.96	539.91	312.06	282.87	215.62	173.31	206.48	222.69	210.56	286.67	258.31
1422551_at	Zkscan3	zinc finger with KRAB and SCAN domains 3	0.0471185	0.0281	18.534	409.21	69.98	430.63	422.45	414.2	391.08	418.36	348.28	462.44	333.82	350.28	403.22	408.85	442.19	466.87	460.35	473.77	461.74	342.8	383.73	364.9	409.58	362.53	384.35	415.07	392.21
1422552_at	Rprm	reprimo, TP53 dependent G2 arrest mediator candidate	0.00484635	0.00364	15	633.9	191.73	633.72	679.57	667.75	685.88	634.08	613.72	669.82	595.44	617.59	574.74	608.85	897.92	924.53	860.04	896.73	780.94	641.3	541.08	561.39	543.91	584.16	565.41	556.78	650.03
1422557_s_at	Mt1	metallothionein 1	0.00673351	0.00331	4.4	12018.5	2859.05	12342.6	11369.5	10601.1	10747.7	11160.5	13619.5	12252.6	14606.2	12204.8	13490.3	11136.9	8992.86	11119.2	9435.86	9928.77	8888.09	12333.7	12056.5	11743.2	12429.4	13193.3	13817.9	13151.3	11980.5
1422660_at	Rbm3	RNA binding motif protein 3	1.81e-06	0.000991	13.91	3696.82	1921.02	3250.38	2280.97	2521.63	1828.46	2402.71	3551.78	4424.42	5466.46	4794.88	5670.5	4335.12	3832.69	4088.59	3147.84	3548.7	2714.56	3358.37	3560.94	4116.16	5157.17	4934.66	5239.97	4400.7	3246.49
1422676_at	Smarce1	SWI/SNF related, matrix associated, actin dependent regulator of chromatin, subfamily e, member 1	0.0317939	0.00634	21.63	855.72	158.94	970.67	913.75	916.24	865.31	856.86	765.68	817.88	798.12	808.64	740.86	861.79	854.59	1058.73	850.98	847.49	1026.79	909.11	829.67	882.49	766.99	834.79	836.3	882.28	1030.64
1422678_at	Dgat2	diacylglycerol O-acyltransferase 2	2.98e-05	0.000872	6.3	269.57	102.4	228.42	234.7	254.18	256.61	277.09	282.75	379.93	268.72	292.15	270.42	222.57	197.49	175.12	190.58	213.37	322.94	297.53	304.36	342.82	312.23	286.54	282.04	231.66	265.65
1422685_at	Exoc4	exocyst complex component 4	0.0227593	0.0485	0.96	1471.8	365.01	1420.68	1582.78	1642.33	1591.15	1476.04	1390.97	1661.83	1355.27	1312.68	1404.25	1391.63	1666.88	1467.56	1586.78	1960.64	1508.34	1512.06	1526.63	1360.74	1544	1230.63	1365.8	1381.07	1430.13
1422686_s_at	Exoc4	exocyst complex component 4	0.00617667	0.00264	0.81	1261.23	229.54	1192.08	1308.12	1258.46	1267.45	1286.7	1149.65	1324.14	1170.01	1130.89	1112.43	1140.31	1355.15	1469.26	1535.17	1437.5	1351.08	1279.8	1276.8	1261.15	1150.27	1076.08	1219.71	1261.32	1241.44
1422743_at	Phka1	phosphorylase kinase alpha 1	0.0042573	0.00643	22.27	222.81	88.06	216.99	287.61	248.64	251.89	212.88	193.59	241.79	241.45	191.1	192.65	193.49	263.48	248.5	305.54	360.52	289.08	222.86	213.39	222.76	210.04	204.76	184.41	213.73	232.75
1422752_at	Polr3k	polymerase (RNA) III (DNA directed) polypeptide K	0.00534649	0.00765	19.42	886.94	171.13	976.54	946.49	980.91	928.43	857.23	750.47	784.94	775.32	919.19	879.44	1006.75	1069.95	884.02	889.85	850.01	883.51	863.48	935.46	727.68	836.65	797.56	938.56	908.03	935.73
1422785_at	Rasa2	RAS p21 protein activator 2	0.016312	0.0336	8.29	784.42	188.29	705.48	795.63	719.25	955.2	867.11	851.11	938.35	836.73	722.57	700.48	693.18	878.15	841.59	782.82	864.17	857.69	786.03	797.45	745.88	746.66	660.73	578.63	667.77	643.03
1422792_at	Pafah1b2	platelet-activating factor acetylhydrolase, isoform 1b, alpha2 subunit	0.0002579	0.000429	19.33	1688.36	534.93	1998.65	1857.38	1915.07	1745.3	1466.12	1285.36	1572.52	1170.6	1326.85	1403.48	1688.7	2240.46	2007.22	2147.69	1975.22	2036.75	1541.59	1579.93	1754.75	1688.02	1437.09	1484.14	1663.28	1785.88
1422794_at	Cul3	cullin 3	0.00769741	0.039	18.27	3196.35	468.87	3393.93	3754.71	3331.08	3079.67	3260.6	3227.54	3450.16	3021.52	3051.64	3165.25	3227.45	3399.14	3445.11	3591.96	3740.11	3423.36	2949.33	2841.47	3071.76	2816.97	2888.03	2997.18	3087.39	2997.17
1422796_at	Prep	prolyl endopeptidase	0.00241024	0.00579	17.19	151.22	39.82	160.93	162.27	156.77	161.65	140.5	152.78	149.03	150.48	148.61	139.9	152.56	179.29	202.62	160.98	179.88	151.06	150.13	135.72	135.1	141.08	122.97	150.4	151.38	158.96
1422845_at	Canx	calnexin	0.00283235	0.00198	18.566	1829.39	471.5	1915.57	2381.55	2115.24	1944.3	1585.92	1573.72	1792.85	1438.56	1745.32	1783.32	1859.8	2122.3	1942.38	2257.78	2233.01	2235.79	1707.29	1964.33	1849.18	1758.45	1562.24	1763.57	1632.94	1809.6
1422858_at	Trip4	thyroid hormone receptor interactor 4	0.00110304	0.00277	19.31	452.27	144.44	514.77	499.55	483.08	492.97	427.61	361.14	533.12	419.58	370.61	395.85	444.56	557.82	613.54	650.01	573.62	568.02	415.92	408.58	393.67	405.87	453.44	419.3	451.1	507.22
1422869_at	Mertk	c-mer proto-oncogene tyrosine kinase	0.0137312	0.02	15.66	208.17	93.98	185.44	232.58	224.35	169.44	155.87	158.84	179.88	230.96	262.1	334.52	292.19	146.56	162.86	183.42	224.89	159.98	149.86	170.11	214.61	201.73	225.81	269.65	322.65	229.32
1422884_at	Snrpd3	small nuclear ribonucleoprotein D3	0.00665813	0.00917	16.65	3594.84	609.92	4070.2	3793.45	3679.01	3435.57	3603.69	3572.34	3624.49	3339.41	3610.87	3599.23	3590.46	3723.47	4314.89	3806.27	3718.12	3621.77	3374.43	3095.06	3101.96	3146.44	3334.88	3559.16	3201.88	3590.01
1422890_at	Pcdh18	protocadherin 18	0.00540443	0.00851	20.97	108.39	64.17	150.08	140.24	156.16	127.68	103.07	99.9	53.27	79.37	119.67	117.09	179.78	181.6	130.97	113.7	115.55	82.49	80.91	82.92	69.27	115.01	86.79	91.37	101.29	99.95
1422895_at	Vamp4	vesicle-associated membrane protein 4	0.00836985	0.019	22.35	3272.62	587.72	3489.18	3275.96	3559.37	3548.48	3331.81	3250.59	3068.96	2903.62	3266.06	3021.94	3332.64	4039.64	3402.72	3425.25	3211.83	3313.22	3402.42	3269.28	2864.2	2891.3	3100.01	3150.79	3050.72	3637.48
1422896_at	Vamp4	vesicle-associated membrane protein 4	0.0123082	0.00185	19.34	744.45	259.24	778.4	783.9	833.12	843.89	696.78	441.61	650.04	611.5	632.42	671.45	729.47	836.12	921.45	960.1	780.09	835.47	701.56	750.12	738.79	775.25	609.67	693.41	708.1	774.12
1422900_at	Mgea5	meningioma expressed antigen 5 (hyaluronidase)	0.0373424	0.00638	17.13	218.54	135.44	251.61	263.61	234.06	231.31	201.4	154.02	228.25	147.9	167.06	179.61	221.55	388.19	240.42	418.78	311.71	302.38	173.93	186.91	278.27	211.63	191.6	174.22	184.57	215.54
1422901_at	Mgea5	meningioma expressed antigen 5 (hyaluronidase)	0.00459968	0.00112	17.717	511.8	291.85	596.14	637.81	527.9	556.67	455.21	401.18	575.07	323.9	400.65	394.33	463.97	755.13	907.59	870.17	773.07	653.96	458.91	466.03	545.75	523.88	449.2	468.35	493.05	499.72
1422902_s_at	Mgea5	meningioma expressed antigen 5 (hyaluronidase)	0.012499	0.0022	16.24	1340.98	636.04	1453.11	1651.09	1350.29	1350.26	1225.57	1069.37	1505.38	1108.47	1175.82	1164.5	1302.19	1901.23	2341.44	2196.06	1857.75	1738.72	1270.26	1379.53	1362.89	1214.37	1296.12	1331.69	1311.02	1311.37
1422955_at	Syt17	synaptotagmin XVII	0.000582397	0.00172	14.7	296.02	418.5	434.08	520.2	367.22	382.06	230.25	251.56	444.39	242.46	235.27	237.55	362.93	969.62	743.28	832.93	803.2	510.49	305.82	145.19	132.61	176.08	165.83	157.13	233.67	286.21
1422980_a_at	Bet1l	blocked early in transport 1 homolog (S. cerevisiae)-like	0.00123004	0.00115	6	245.26	50.71	243.12	227.75	235.3	221.35	269.89	269.19	279.25	280.34	247.41	269.77	238.01	220.14	241.85	203.34	181.09	241.77	252.61	241.06	269.71	268.79	280.07	282.51	238.32	256.78
1422993_s_at	Refbp2 /// Thoc4	RNA and export factor binding protein 2 /// THO complex 4	0.0056716	0.00364	15.49	1211.37	266.11	1350.18	1345.3	1216.26	1195.05	1108.24	1166.16	1339.39	1206.48	1183.94	1112.8	1292.09	1581.33	1494.71	1385.16	1235.35	1225.99	1237.63	1100.74	1049.1	1057.04	1070.08	1142.76	1180.6	1300.9
1422997_s_at	Acot1 /// Acot2 /// LOC100044830	acyl-CoA thioesterase 1 /// acyl-CoA thioesterase 2 /// similar to acyl-CoA thioesterase	0.000276762	0.00144	5.3	312.37	87.16	340.19	317.47	293.63	304.23	389.18	372.1	394.39	330.97	245.61	238.35	235.36	266.24	229.47	310.26	328.5	364.45	403.8	373.25	322.08	314.47	291.93	303.15	267.86	297.23
1423043_s_at	Ddx3x	DEAD/H (Asp-Glu-Ala-Asp/His) box polypeptide 3, X-linked	0.0162076	0.00698	11.45	9154.77	1088.4	8355.29	8831.74	9149.29	8929.6	9128.82	9530.95	10532.1	9797.38	9753.09	10096.1	9598.29	9170.82	9160.26	8511.59	9612.94	9025.22	9039.08	9523.89	9138.03	9850.22	9269.63	9090.19	8895.24	8518.39
1423050_s_at	Hnrnpu	heterogeneous nuclear ribonucleoprotein U	0.0118492	0.000895	17.719	10240.5	1685.48	10153.4	10724.6	10203.9	10070.6	9498.95	8828.9	9878.01	8841.27	9199.51	9572.56	10574.3	11769	12199.9	11320.3	11253.9	12191.8	10666.9	9895.66	10417.4	10277.1	9442.05	9419.78	11027.8	10746.6
1423051_at	Hnrnpu	heterogeneous nuclear ribonucleoprotein U	0.0196121	0.00138	17.442	4636.86	1173.03	4696.54	4696.28	4417.14	4449.4	4058.98	3831.46	4507.44	3777.74	3843.6	4387.62	4691.32	5865.42	6123.79	5607.5	5577.51	5749.2	4656.36	4281.56	4660.62	4617.36	4584.82	4409.33	5167.52	4894.58
1423059_at	Ptk2	PTK2 protein tyrosine kinase 2	0.0351477	0.0178	16.33	1210.82	477.28	1234.16	1333.32	1196.16	1270.19	1094.41	1152.62	1074.65	1207.34	1128.73	1089.37	1247.75	1623.4	2028.99	1387.73	1530.41	1124.84	1166.41	1096.91	1074.44	1248.13	1214.31	1221.07	1185.65	1232.02
1423073_at	Cmpk1	cytidine monophosphate (UMP-CMP) kinase 1	0.00810344	0.0035	10.34	6204.93	732.72	6254.85	5933.27	5854.84	6208.64	6081.18	6553.11	6793.39	6475.01	6437.67	6201.23	6209.16	6122.58	5327.94	5731.66	5879.2	6213.1	6228.61	6057.05	6533.45	6221.3	6181.78	6170.58	5890.71	6233.95
1423078_a_at	Sc4mol	sterol-C4-methyl oxidase-like	0.00182377	0.000696	15.75	2664.07	728.6	2995	2887.68	2890.1	2577.75	2386.87	2249.42	2515.81	2625.54	2995.98	2839.95	2929.02	3032.09	3649.02	3295.89	3483.12	2676.7	2651.44	2568.16	2191.81	2404.5	2612.25	2637.8	2896.43	2595.25
1423096_at	Capn7	calpain 7	0.00420016	0.00115	18.798	1050.54	231.09	1067.17	1131.2	1080.15	1033.16	949.36	910.77	977.91	912.49	985.96	1007.36	1094.3	1058.1	1366.79	1247.73	1259.17	1165.82	1047.58	1053.5	975.82	1045.36	987.09	904.62	1224.47	1080.39
1423097_s_at	Capn7	calpain 7	0.0044257	0.00203	17.187	1896.53	307.9	1902.19	1898.89	1976.41	1897.94	1714.59	1528.73	1793.81	1730.88	1850.63	1855.89	2085.17	2091.07	1951.6	2037.77	2144.53	2056.48	1764.35	1831.53	1633.32	1895.13	1776.53	1776.37	2019.11	1902.57
1423100_at	Fos	FBJ osteosarcoma oncogene	0.00336679	0.019	10.02	760.97	1282.23	412.63	438.99	890.66	1418.14	1469.85	1048.42	2852.85	1002.26	663.86	760.45	761.5	488.68	288.39	309.03	866.69	1924.07	1114.98	711.87	784.27	947.94	565.98	450.66	754.52	396.4
1423113_a_at	Ube2d3	ubiquitin-conjugating enzyme E2D 3 (UBC4/5 homolog, yeast)	0.014079	0.0108	16.69	3199.62	390.48	3598.69	3411.33	3174.22	3330.38	3263.32	3430.5	3139.73	3167.42	3210.06	3075.5	3611.13	3703.38	3614.65	3374.75	3189.19	3170.19	3035.38	3028.69	3186.79	2948.85	2922.42	3099.8	3291.96	3386.95
1423129_at	Shoc2	soc-2 (suppressor of clear) homolog (C. elegans)	0.0210459	0.00998	18.807	1035.93	261.22	1057.73	1110.97	1235.07	1045.79	935.97	905.15	1016.77	881.9	910.59	913.93	1073.19	1353.29	1133.32	1199.01	1082.12	1219.73	875.49	1078.93	995.11	1026.07	978.28	830.85	967.04	1107.11
1423130_a_at	Sfrs5	splicing factor, arginine/serine-rich 5 (SRp40, HRS)	0.0430015	0.0359	7.7	4704.92	1427.99	3939.45	4354.73	4248.71	4541.75	4450.35	4922	6456.59	4623.79	4786.05	4379.37	3992.13	3600.61	4429.96	6282.21	5308.73	5376.62	5174.48	5273.87	6219.22	5795.11	4789.05	5045.01	4076.87	4041.25
1423146_at	Hes5	hairy and enhancer of split 5 (Drosophila)	0.0171591	0.00235	0.58	141.41	37.33	145.81	127.01	146.52	148.35	142.94	139.87	94.66	138.91	125.53	107.63	143.74	132.7	161.19	143.25	167.88	154.25	169.32	129.23	119.03	119.05	118.53	106.64	143.17	162.24
1423158_at	Gnpnat1	glucosamine-phosphate N-acetyltransferase 1	0.00376705	0.00341	16.97	254.39	50.73	279.14	258.49	261.25	260.37	224.05	222.27	290.22	223.82	230.55	255.69	298.2	307.12	286.05	244.31	273.48	254.29	235.35	205.66	220	231.49	239	246.7	254.49	289.62
1423220_at	Eif4e	eukaryotic translation initiation factor 4E	0.0121072	0.00109	17.438	1671.22	493.59	1892.81	1790.78	1787.91	1675.33	1420.04	1455.41	1531.39	1572.97	1504.7	1554.74	1625.97	1988.12	2407.23	1960.33	1899.36	1842.24	1639.39	1618.5	1807.73	1734.7	1593.19	1606.68	1667.11	1717.45
1423234_at	Psmd5	proteasome (prosome, macropain) 26S subunit, non-ATPase, 5	0.00255479	0.00384	18.996	833.89	153.73	990.61	878.44	865.17	742.16	726.58	808.93	694.99	683.15	775.11	826.63	899.68	884.14	834.42	930.14	855.7	833.36	777.33	746.21	914.88	769.97	744.38	851.5	870.57	902.75
1423246_at	Txndc4	thioredoxin domain containing 4 (endoplasmic reticulum)	0.00182325	0.00281	17.169	450.27	120.08	500.73	541.35	486.41	492.87	417.36	360.31	454.58	412.73	436.14	435.88	466.51	600.46	545.42	513.24	597.75	460.99	415.39	434.54	394.8	445.96	428.39	410.47	394.88	463.44
1423247_at	Txndc4	thioredoxin domain containing 4 (endoplasmic reticulum)	7.31e-05	0.000489	18.522	794.63	239.26	927.95	887.81	793.43	795.84	674.77	542.42	821.52	677.79	683.06	659.33	816.81	995.19	1020.95	981.83	911.3	865.69	762.32	647.38	670.06	730.36	681.8	724.28	805.26	848.48
1423250_a_at	Tgfb2	transforming growth factor, beta 2	0.000462709	0.000775	5.1	234.92	78.55	215.28	228.18	227.18	225.35	288.54	236.89	302.32	312.03	254.91	271.32	175.52	172.86	154.93	155.15	164.16	232.95	276.62	252.41	250.44	237.18	278.2	266.95	217.21	195.04
1423258_at	Syt9	synaptotagmin IX	0.00395309	0.00184	16.27	504.45	157.25	552.36	526.39	525.77	514.03	495.19	467.94	484.3	498.03	480.5	473.83	465.32	677.46	769.76	638.43	639.21	545.57	550	506.57	477.56	476.01	455.25	473.06	502.33	552.66
1423265_at	Minpp1	multiple inositol polyphosphate histidine phosphatase 1	0.0330567	0.00727	16.56	2190.29	431.52	2370.41	2199.03	2441.94	2258.28	1958.96	1838.29	2210.94	1998	2063.04	2148.09	2184.46	2487.08	2701.34	2235.06	2401.66	2419.34	1981.93	2196.13	1900.77	2209.36	1961.47	2028.45	2043.07	2012.22
1423274_at	Ints6	integrator complex subunit 6	0.0413713	0.0124	6.9	9481.1	1996.4	8682.33	9908.22	8760.76	9440.81	10191.9	9720.82	11849	9963.14	9201.95	9137.74	8375.19	9504.09	9362.55	9227.5	9479.35	9482.85	9621.6	9927.09	11839.9	10003.4	10811.6	7880.58	9469.84	7856.16
1423278_at	Ptprk	protein tyrosine phosphatase, receptor type, K	0.0287443	0.0174	4.8	899.05	238.14	812.25	910.68	937.83	986.8	926.84	891.66	1245.7	769.43	790.93	873.46	780.39	838.31	769.46	988.35	893.03	1070.96	905.07	998.49	1145.75	975.72	906.67	798.48	796.77	864.32
1423285_at	Coch	coagulation factor C homolog (Limulus polyphemus)	7.31e-05	0.00577	1.36	198.05	84.66	216.93	247	202.46	219.96	197.81	198.28	198.55	190.8	136.52	117.9	128.02	212.5	268.74	220.05	229.91	287.09	211.4	175.53	117.77	129.2	144.8	135.42	168.89	193.58
1423294_at	Mest	mesoderm specific transcript	0.030142	0.0105	2.65	199.04	55.41	177.89	194.23	201.99	223.12	209.32	217.49	221.76	149.28	141.13	132.56	214.98	243.39	203.64	223.66	201.08	234.48	197.1	150.71	183.74	166.53	158.55	155.55	190.5	200.98
1423297_at	Add3	adducin 3 (gamma)	0.000303568	0.0012	16.58	243.65	124.15	308.84	319.77	239.53	259.9	241.26	228.38	266.81	193.57	227.27	205.34	274.48	374.11	429.07	396.33	421.81	297.41	240.62	209.93	180.76	221.25	223.01	246.04	230.57	251.65
1423299_at	Txnl1	thioredoxin-like 1	0.0354342	0.0377	21.28	1237.28	293.4	1553.04	1368.71	1323.84	1320.55	1221.87	1207.86	1189.84	1209.09	1143.95	1147.8	1245.7	1137.6	1724.41	1370.87	1249.6	1281.05	1197.64	1211.51	1185.85	1230.39	1195.81	1320.64	1244.16	1287.49
1423301_at	Copb1	coatomer protein complex, subunit beta 1	0.0345045	0.00672	16.04	1197.98	187.97	1257.03	1250.35	1263.93	1196.43	1073.17	1091.5	1279.07	1092.19	1200.3	1122.15	1260.74	1345.94	1449.11	1307.04	1291.34	1199.52	1116.48	1086.92	1138.65	1240.48	1119.1	1077.74	1193.19	1190.49
1423322_at	Lin7c	lin-7 homolog C (C. elegans)	0.0144704	0.00197	16.54	960.36	461.38	1139.73	1149.95	995.51	1004.39	764.13	702.62	1164.08	677.19	830.44	798.99	952.52	1427.69	1325.92	1599.95	1428.21	1291.19	865.86	829.32	968.2	945.09	882.35	836.3	992.33	879.95
1423343_at	Slco1c1	solute carrier organic anion transporter family, member 1c1	0.0168059	0.00758	10.12	668.94	130.87	655.11	644.05	635.43	592.05	670.33	786.79	702.86	749.3	667.56	619.56	570.02	720.72	603.47	702.53	700.77	655.87	779.41	786.47	719.96	736.31	694.67	592.1	610.2	525.06
1423348_at	Fzd8	frizzled homolog 8 (Drosophila)	0.00418497	0.00175	13.88	143.26	294.33	236	218.16	154.75	96.17	77.26	106.32	244.16	107.81	140.09	240.13	230.38	655.81	467.18	314.99	398.84	112.89	113.28	75.94	67.15	91.74	90.46	105.59	168.39	146.43
1423385_at	Actr8	ARP8 actin-related protein 8 homolog (S. cerevisiae)	0.0212002	0.027	13.69	1077.38	151.91	1174.63	961.78	1038.78	1022.33	1080.34	1048.45	1033.73	1165.86	1139.06	1089.03	1127.93	924.33	1031.22	942.36	905.95	1011.78	1023.27	1114.88	1154.05	1124.89	1094.82	1182.19	1209.76	1074.42
1423398_at	Taf12	TAF12 RNA polymerase II, TATA box binding protein (TBP)-associated factor	0.0204208	0.0121	20.11	122.97	38.36	166.8	144.49	143.34	142.97	113.28	98.84	128.69	95.97	112.43	139.08	139.65	118.25	161.14	128.7	119.56	106.62	126.37	117.33	109.58	90.07	119.23	101.83	160.25	142.17
1423440_at	1110001A07Rik	RIKEN cDNA 1110001A07 gene	0.00457812	0.00416	16.32	297.74	136.26	366.63	345.83	305.02	320.12	255.62	264.84	340.56	218.52	258.18	281.87	333.7	491.04	427.65	387.42	356.79	345.01	243.63	243.33	277.9	293.61	270.75	261.46	271.3	301.86
1423441_at	Tfb2m	transcription factor B2, mitochondrial	0.000495183	0.000696	6.3	703.43	149.4	665.6	641.33	660.61	725.21	731.77	774.32	734.06	710.55	754.63	750.88	712.17	591.09	518.13	647.87	639.32	648.09	672.56	780.55	756.91	816.93	696.32	737.01	644.74	656.41
1423450_a_at	Hs3st1	heparan sulfate (glucosamine) 3-O-sulfotransferase 1	0.000546516	0.00132	14.56	349.57	345.15	442.91	395.7	350.91	255.58	241.72	295.32	313.36	348.24	306.53	411.65	471.98	921.99	852.28	684.74	792.67	270.81	231.69	249.75	282.49	261.91	300.29	390.8	512.43	393.13
1423461_a_at	Ubl3	ubiquitin-like 3	0.000623877	0.000556	6.7	6369.99	2033.69	6057.8	6288.99	6651.12	6766.76	7190.08	7513.14	8213.89	6451	7138.07	6072.71	6159.81	5550.92	4146.52	4813.67	4987.98	6256.03	6732.13	6643.69	6755.25	7209.35	6536	6001.56	5430.96	5558.97
1423470_at	Ptbp2	polypyrimidine tract binding protein 2	0.0252312	0.00206	16.27	5316.8	908.62	5328.43	5522.22	5341.74	5342.67	4750.93	4796.03	5062.53	4717.88	4950.56	5305.16	5530.2	6535.13	5581.9	5684.56	5949.04	6139.66	5204.75	4741.7	5216.21	5360.35	4974.79	4922.78	5372.34	5214.02
1423474_at	Top1	topoisomerase (DNA) I	0.0145668	0.00548	16.08	2831.07	862.96	3024.87	2897.55	2956.89	2802.29	2526.59	2490.73	3200.67	2494.04	2588.2	2679.95	3150.29	3427.78	4114.03	3184.11	3002.6	2956.98	2588.57	2444.88	2388.12	2859.86	2604.6	2557.51	3113.33	2799.45
1423488_at	Mmd	monocyte to macrophage differentiation-associated	0.000907214	0.000998	21.87	1518.8	250.16	1638.04	1556.53	1614.94	1702.15	1471.13	1315.8	1363.71	1251.09	1437.37	1371.63	1437.05	1523.33	1529.5	1571.26	1657.29	1751.4	1586.22	1489.48	1457.04	1539.13	1317.8	1514.27	1416.91	1565.15
1423490_at	Fbxo3	F-box protein 3	0.00187032	0.0041	20.53	2166.21	309.11	2292.58	2241.62	2292.09	2247.79	2076.38	1875.65	2170.32	1815.23	2017.85	1934.64	2207.21	2433.44	2252.52	2182.1	2198.64	2376.09	2162.1	2011.19	2037.9	2149.54	1945.38	1968.31	2098.61	2225.61
1423515_at	Scn8a	sodium channel, voltage-gated, type VIII, alpha	0.023908	0.0229	8.92	1332.46	412.57	1175.69	1291.76	1228.51	1398.99	1338.3	1356.12	1191.19	1430.43	1424.17	1552.73	1326.62	991.43	1130.03	1100.79	1079.4	1195.46	1363.89	1556.33	1816.57	1377.42	1408.44	1211.3	1502.52	1192.88
1423517_at	Cct6a	chaperonin containing Tcp1, subunit 6a (zeta)	0.00335529	0.000832	18.274	4086.04	743.06	4524.7	4389.49	4122.91	4063.38	3641.1	3945.91	3822.01	3702.52	3504.23	3691.89	4108.71	4990.36	4952.06	4647.7	4161.75	4604.23	4170.48	3923.12	4240.64	3987.36	3767.35	3792.28	3894.74	4401.69
1423530_at	Stk32c	serine/threonine kinase 32C	0.0222151	0.0279	15.46	550.31	410.56	845.62	813.02	582.17	609.76	475.26	498.7	841.35	525.19	545.96	472.36	578.84	1162.54	793.86	697.21	900.31	589.86	406.97	351.07	377.43	346.01	341.42	467.7	415.22	554.65
1423536_at	Strn3	striatin, calmodulin binding protein 3	0.00129627	0.000674	15.75	1671.71	256.41	1804.58	1742.94	1707.57	1606.75	1601.48	1592.17	1677.54	1552.56	1666.03	1682.6	1761.56	1951.45	2064.46	1838.12	1768.83	1736.87	1613.51	1551.63	1555.07	1623.15	1600.74	1652.03	1677.38	1608.61
1423545_a_at	Zfp207	zinc finger protein 207	1.88e-05	0.000335	17.746	1082.14	261.94	1274.48	1202.38	1108.44	1028.35	1032.64	973.23	1059.15	1010.62	1001.42	1142.81	1365.02	1417.09	1074.84	1381.33	1225.34	1236.54	1007.87	893.21	937.36	958.04	1031.22	1089.45	1365.1	1298.08
1423566_a_at	Hsph1	heat shock 105kDa/110kDa protein 1	1.85e-06	0.000426	19.56	4670.59	2492.54	5455.04	5851.26	5188.9	5241.72	4419.96	3831.49	3731.42	3439.55	3671.11	3257.91	4783.02	6263.55	8242.98	5735.27	5095.12	5951.24	4790.41	4233.46	4251.27	3413.8	3441.43	3470.93	4558.17	5146.36
1423567_a_at	Psma7	proteasome (prosome, macropain) subunit, alpha type 7	0.00126008	0.00195	9.14	2984.04	410.16	2781.13	2847.7	2783.1	2748.12	3022.22	3237.4	3295.15	3214.03	3369.25	3385.4	2932.39	2607.67	2565.08	3040.27	2865.89	2876.6	2929.25	3038.66	2971.26	3169.01	2996.82	3255.83	3036.44	2815.89
1423568_at	Psma7	proteasome (prosome, macropain) subunit, alpha type 7	0.0244719	0.00851	11.62	1886.69	294.76	1883.19	1825.83	1853.06	1605.26	1866.8	1994.6	2116.1	2152.39	1897.86	2168.52	1858.18	1579	1716.65	1893.89	1783.5	1868.04	1907.79	1890.2	1965.95	1894.67	2021.11	2056.37	1832.43	1741.28
1423573_at	LOC100044230 /// Srd5a3	hypothetical protein LOC100044230 /// steroid 5 alpha-reductase 3	0.0278877	0.00682	11.18	141.18	59.31	141.12	141.25	148.62	121.98	141.1	150.33	155.62	218.63	157.49	163.17	141.29	100.01	139.37	118.12	113.44	123.21	124.86	156.6	140.79	156.39	145.41	161.04	137.08	112.2
1423613_at	Ssfa2	sperm specific antigen 2	0.000654947	0.00144	18.928	567.25	127.11	663.61	654.27	566.18	644.15	561.86	543.38	459.2	592.11	554.34	598.3	713.41	672.88	588.26	573.21	514.47	546.53	496.69	498.86	522.54	481.01	562.84	568.32	663.7	679.29
1423619_at	Rasd1	RAS, dexamethasone-induced 1	1.15e-06	8.87e-05	15.24	1895.7	3750.97	3967.46	3028.52	1391.79	833.47	796.14	1084.04	1967.78	1406.5	1823.62	3846.83	4537.18	8132.52	7927.69	6260.48	4699.24	1644.33	1225.82	630.59	633.85	881.58	1633.22	2583.26	4557.4	3249.99
1423648_at	Pdia6	protein disulfide isomerase associated 6	0.00374116	0.00153	18	1591.47	609.51	1982.02	1652.63	1480.01	1432.79	1313.28	1270.43	1481.72	1290.77	1240.57	1394.33	1565.96	1945.88	2459.59	2121.46	1646.28	1803.18	1723.7	1414.43	1506.75	1616.99	1505.11	1622.11	1653.16	1823.68
1423666_s_at	EG664956 /// LOC632230 /// LOC675821 /// OTTMUSG00000000504 /// OTTMUSG00000022843 /// OTTMUSG00000024374 /// Rpl5	predicted gene, EG664956 /// similar to 60S ribosomal protein L5 /// similar to 60S ribosomal protein L5 /// predicted gene, OTTMUSG00000000504 /// predicted gene, OTTMUSG00000022843 /// predicted gene, OTTMUSG00000024374 /// ribosomal protein L5	0.0177057	0.00296	6.7	389.84	61.67	364.35	363.78	417.03	390.5	377.16	444.93	419.43	447.07	361.82	392.71	389.17	323.74	355.89	358.74	372.56	353.75	380.45	411.46	433.08	416.55	392.66	410.27	370.22	402.69
1423697_at	Psmd6	proteasome (prosome, macropain) 26S subunit, non-ATPase, 6	0.00290437	0.0139	16.49	5959.27	517.35	6523.38	5803.52	5552.6	5577.7	5578.8	5688.03	5790.37	5869.62	6015.91	6173.76	6240.38	6038.17	6432.26	6265.71	5865.26	5902.63	6021.26	5567.59	6321.24	5806.46	5881.67	6380.97	6587.3	6510.04
1423701_at	Coasy	Coenzyme A synthase	0.0419199	0.00779	16.59	297.46	66.75	320.42	316.66	288.87	306.57	255.29	269.11	314.37	300.29	275.39	281.97	296.02	307.95	388.8	329.85	330.24	323.68	293.16	271.66	262.38	298.89	287.01	266.61	288.4	313.65
1423723_s_at	Tardbp	TAR DNA binding protein	8.84e-08	0.000322	20.49	1902.79	770.13	2160.7	2144	2168.14	1987.16	1928.66	1570.79	1319.76	1401.13	1438.15	1436.04	1931.85	2507.04	2860.02	2506.02	1981.07	2238.09	1783.48	1782.55	1524.26	1567.36	1461.13	1506.24	1876.93	2155.56
1423729_a_at	Rnf181	ring finger protein 181	0.000676027	0.00167	16.96	1831.7	311.72	2051.41	1840.61	1823.41	1694.39	1628.2	1709.3	1828.08	1792.12	1827.8	1852.88	1835.32	2101.23	2251.65	2074.6	2012.18	1695.32	1865.04	1802.79	1708.82	1713.26	1828.07	2012.23	1994.1	1969.56
1423740_a_at	Rbm10	RNA binding motif protein 10	0.00100583	0.0475	16.83	2654.75	566.19	2245.44	2447.29	2398.61	2314.09	2393.55	2075.56	2378.35	2125	2082.54	2474.69	2774.53	2995.57	3207.94	3057.61	3005.64	3177.84	2594.9	2764.82	2888.66	2845.92	2714.59	2432.9	3079.3	2851.52
1423744_x_at	Eif2s3x	eukaryotic translation initiation factor 2, subunit 3, structural gene X-linked	0.0404502	0.0467	5.6	4628.29	563.11	4394.68	4326.74	4753.57	4696.9	4438.95	4610.17	4882.9	4624.59	4519.86	4770.61	4743	4649.3	4591.8	4135.8	4411.25	4332.62	4539.07	4631.99	4881.6	5262.02	4779.52	4609.88	4777.11	4690.11
1423753_at	Bambi	BMP and activin membrane-bound inhibitor, homolog (Xenopus laevis)	0.0114784	0.00367	7.8	162.01	107.66	183.95	142.3	137.62	164.74	200	208.65	300.9	201.91	202.9	164.46	157.82	142.31	110.58	120.36	85.58	149.94	212.43	160.41	191.94	157.46	163.61	166.44	155.65	144.29
1423786_at	8430410A17Rik	RIKEN cDNA 8430410A17 gene	0.0238114	0.0101	17.202	261.55	70.63	304.3	280.86	260.75	239.34	263.31	262.36	258.93	256.71	258.6	259.38	279.38	258.6	354.45	322.14	283.4	259.65	265.78	234.11	221.07	267.5	213.19	248.16	306.98	268.75
1423795_at	Sfpq	splicing factor proline/glutamine rich (polypyrimidine tract binding protein associated)	4.52e-08	9.15e-05	18.741	3868	2020.31	5077.19	4522.7	4315.06	4342.85	3839.17	3090.61	2770.35	2893.57	3380.92	3568.9	5729.84	6628.92	5939	4730.82	3896.82	3906.24	3422.75	3274.32	2588.31	2904.53	3458.94	3495.26	4864.17	5145.47
1423796_at	Sfpq	splicing factor proline/glutamine rich (polypyrimidine tract binding protein associated)	1.85e-06	0.00101	20.2	686.18	387.2	862.67	913.83	776.61	874.65	698.79	621.03	587.35	539.08	535.38	566	841.31	1256.07	919.67	861.07	809.66	765.94	579.83	609.87	481.67	512.17	493	551.3	673.58	837.91
1423803_s_at	Gltscr2	glioma tumor suppressor candidate region gene 2	0.000130802	0.000232	4.3	2589.83	609.14	2600.66	2244.63	2398.48	2579.01	2620.56	3098.01	2872.05	3090.77	2758.38	2690.37	2426.41	2030.96	1879.73	2125.89	2156.63	2370.2	2710.45	2556.37	2766.93	2731.19	2886.21	2996.72	2545.39	2551.87
1423812_s_at	AW146242	expressed sequence AW146242	0.0254491	0.00608	15.99	1458.47	407.04	1532.11	1486.34	1549.27	1443.23	1399.42	1401.19	1568.87	1398.12	1356.27	1342.21	1448.82	1843.31	2135.38	1894.68	1974.66	1605.3	1388.15	1321.29	1346.84	1467.45	1382.21	1487.9	1557.33	1449.48
1423815_at	Ddx56	DEAD (Asp-Glu-Ala-Asp) box polypeptide 56	0.0256264	0.0121	17.79	218.97	47.41	231.74	214.64	217.08	197.83	184.75	194.68	161.52	256.33	247.1	226.8	231.11	217.18	210.88	190.46	187.62	185.66	219.12	218.83	223.94	220.38	228.85	236.8	246.06	222.7
1423817_s_at	Use1	unconventional SNARE in the ER 1 homolog (S. cerevisiae)	0.032505	0.0283	8.02	2747.73	391.77	2923.09	2493.22	2486.4	2443.35	2830.72	3036.08	2719.13	3115.01	2744.27	2811.7	2720.71	2509.58	2331.47	2619.51	2497.75	2383.08	2975.57	2764.17	2751.19	2738.18	2887.55	3064.51	2794.66	2762.42
1423822_a_at	Tmem168	transmembrane protein 168	0.0307655	0.0248	16.28	139.18	41.33	143.28	161.59	157.92	144.98	140.51	112.04	175.54	124.62	122.8	137.84	160.68	161.83	169.95	158.85	186.38	158.51	127.03	130.52	103.72	128.67	124.06	106.68	130.54	131.89
1423831_at	Prkag2	protein kinase, AMP-activated, gamma 2 non-catalytic subunit	6.58e-05	0.000632	16	660.11	736.44	808.4	825.9	719.57	729.09	609.82	599.47	636.2	500.02	536.58	526.84	757.6	1556.25	1839.24	1161.25	1336.8	904.21	657.11	513.02	366.36	466.01	476.67	551.25	663.11	791.13
1423832_at	Prkag2	protein kinase, AMP-activated, gamma 2 non-catalytic subunit	7.01e-06	0.000349	18.266	287.49	198.64	307.17	411.08	300.88	337.19	263.75	225.99	241.07	239.89	223.41	273.03	306.97	500.22	534.22	487.26	563.89	343.45	274.11	248.98	166.62	226.77	246.68	254.09	320.33	333.91
1423841_at	Bxdc2	brix domain containing 2	0.00120395	0.00284	16.66	274.39	104.12	298.47	288.88	300.68	280.57	259.79	229.24	283.5	247.05	250.49	282.77	296.81	379.73	277.51	301.35	324.92	271.27	239.93	215.82	171.5	181.92	192.56	221.89	265.89	291.72
1423882_at	Rfwd3	ring finger and WD repeat domain 3	0.0230662	0.0048	16.3	314.78	84.85	346.66	334.71	308.58	321.55	267.95	267.69	366.04	290.09	304.23	316.17	313.39	358.85	437.38	389.63	432.36	362.67	303.5	291.54	307.74	301.34	278.55	304.7	348.53	348.25
1423883_at	Acsl1	acyl-CoA synthetase long-chain family member 1	0.0150982	0.0154	14.31	1897.01	402.42	1985.69	1785.82	1928.54	1808.14	1896.47	1963.4	1842.26	2028.86	2132.02	2058.28	1897.56	1802.27	1515.03	1718.75	1676.14	1525.51	1879.67	2184.81	2223.57	1972.2	2027.17	2319.88	1745.93	1873.56
1423912_at	Aspscr1	alveolar soft part sarcoma chromosome region, candidate 1 (human)	0.000589413	0.0102	14.53	217.88	47.71	208.69	209.5	180.63	196.55	204.76	207.01	226.37	261.31	258.91	244.44	244.74	206.42	226.49	202.54	216.45	205.33	215.39	219.31	276.04	228.84	227.86	251.57	216.34	239.76
1423921_at	Ints3	integrator complex subunit 3	0.0253887	0.00432	15.75	287.27	85.71	310.75	331.37	295.95	312.56	277.24	220.44	262.28	284.93	302.96	291.46	308.61	350.07	357.43	317.68	354.52	243.24	282.11	286.05	186.01	241.72	259.26	201.54	266.47	288.5
1423922_s_at	Ints3	integrator complex subunit 3	0.0149398	0.00254	15.05	760.23	198.87	781.74	841.65	751.3	792.83	721.46	700.59	868.56	698.44	768.11	706.99	800.08	987.64	846.73	1031.8	928.35	901.72	711.17	698.79	725.77	634.06	681.64	644.14	752.35	808.04
1423936_at	Kctd5	potassium channel tetramerisation domain containing 5	0.006932	0.00804	3.28	422.68	73.08	409.71	422.63	466.16	461.05	405.81	431.53	422.75	450.63	400.84	361.8	359.43	403.95	382.98	456.99	505.59	448.49	422.73	448.31	480.51	398.75	367.83	405.61	382.28	423.67
1423939_a_at	Yif1a	Yip1 interacting factor homolog A (S. cerevisiae)	0.00211705	0.00165	12.12	717.98	201.38	645.61	684.33	720.82	682.62	697.75	744.04	743.47	829.36	802.37	799.77	786.48	711.83	468.04	631.43	700.58	643.34	711.13	768.05	870.8	791.16	767.37	799.87	715.14	655.19
1423960_at	Lpcat3	lysophosphatidylcholine acyltransferase 3	0.00827156	0.00876	8.58	305.71	82.77	278.67	312.13	306.61	336.76	365.21	326.72	333.65	375.39	337.19	258.16	252.74	209.86	267.52	301.63	325.01	304.81	328.74	357.86	301.25	265.5	293.16	328.04	256.18	295.83
1423970_at	Thoc3	THO complex 3	0.00902974	0.00457	14.24	558.51	127.4	635.68	549.53	476.68	529.39	578.05	567.92	536.52	666.94	719.57	673.71	556.66	513.41	511.68	523.15	464.76	491.88	612.91	550.1	631.99	530.53	662.81	634.3	574.91	560.35
1423971_at	Thoc3	THO complex 3	0.0124993	0.000868	15.26	469.76	77.65	470.72	456.62	468.22	405.56	436.94	453.08	527.87	514.71	560.86	516.36	522.22	504.04	426.89	452.44	427.97	468.81	487.36	432.26	544.05	502.61	486.65	507.35	435.3	440.95
1424007_at	Gdf10	growth differentiation factor 10	0.0317384	0.00202	14.79	318.86	224.91	349.9	359.73	223.06	202.15	193.97	230.08	422.04	192.61	248.74	355.67	326.5	631.98	611.81	505.35	518.44	521.07	282.12	182.16	248.3	193.07	294.61	336.66	311.22	360.15
1424016_at	2310007F21Rik	RIKEN cDNA 2310007F21 gene	0.00200977	0.000353	14.78	553.93	154.95	592.53	557.39	566.57	568.62	459.82	497.18	535.29	534.1	529.26	550.46	585.1	752.58	769.72	696.5	732.86	573.74	543.36	469.79	499.52	511.09	477.16	476.58	578.97	565.48
1424023_at	Atpbd3	ATP binding domain 3	0.0209665	0.00559	14.14	284.03	98.76	304.5	282.78	286.13	269.51	261.25	313.76	252.11	289.29	292.9	320.12	300.85	330.26	415.86	287.93	275.57	262.58	248.29	236.48	230.43	218.33	282.89	274.56	303.57	285.16
1424033_at	Sfrs7	splicing factor, arginine/serine-rich 7	0.001731	0.00176	18.267	5777.16	864.96	5716.01	5872.73	6062.8	6196.52	5664.26	5112.4	5545.49	5143.07	5453.54	5547.36	6435.32	6536.21	6748.37	6160.93	6340.74	6320.91	5661.12	5838.3	5018.45	5576.65	5290.63	5020.92	6314.12	5848.35
1424034_at	Rora	RAR-related orphan receptor alpha	0.0134307	0.0158	9.61	2411.87	2790.75	1397.98	1585.62	1229.54	2383.37	2795.41	4014.28	6752.05	3632.42	3004.7	3323.24	1774.85	2690.47	2337.87	2150.3	2629.96	2512.86	2331.9	2119.31	2440.37	2864.64	2990.09	2322.1	1801.41	1170.55
1424043_at	Ppil4	peptidylprolyl isomerase (cyclophilin)-like 4	0.0119019	0.00365	18.771	1011.4	151.52	1105.38	1015.04	1019.07	954.26	917.44	870.3	1038.69	928.42	969.48	926	1082.59	1048.03	1093.41	1101.65	1058.07	1173.33	986.37	926.13	965.14	1000.44	956.15	1007.76	1094.2	1097.23
1424050_s_at	Fgfr1	fibroblast growth factor receptor 1	0.000868636	0.000824	4.6	694.1	237.71	638.29	573.59	682.88	605.6	737.85	691.09	777.8	811.44	844.86	757.56	674.91	526.39	602.02	403.03	451.59	561.19	677.13	772.92	699.99	705.17	765.31	878.44	697.11	723.74
1424055_at	Ncoa5	nuclear receptor coactivator 5	0.000216018	0.000764	17.733	220.39	75.75	247.6	223.15	231.29	229.32	206.14	182.21	204.04	178.86	203.64	197.35	244.42	306.92	330.36	308.47	226.11	229.91	217.63	217.02	214.46	193.22	188.37	191.76	232.64	273.25
1424062_at	Ube2d1	ubiquitin-conjugating enzyme E2D 1, UBC4/5 homolog (yeast)	0.00374924	0.00121	14.8	622.2	427.91	738.22	739.46	673.76	629.55	500.13	619.57	579.15	645.69	602.43	518.42	699.62	1258.14	1327.19	938.42	1027.94	575.99	578	498.25	506.57	497.59	471.38	506.1	624.82	643.27
1424095_at	Rtcd1	RNA terminal phosphate cyclase domain 1	0.0158236	0.0195	13.48	1667.81	253.61	1663.42	1513.36	1509.21	1528.05	1577.35	1558.79	1778.06	1790.82	1882.81	1785.85	1755.22	1682.94	1375.6	1658.13	1682.81	1592.19	1640.79	1717.73	1522.53	1715.46	1839.33	1735.54	1625.39	1672.21
1424097_at	Elovl7	ELOVL family member 7, elongation of long chain fatty acids (yeast)	0.0377608	0.00238	6.6	123.46	89.67	115.07	129.81	129.92	162.26	191.41	239.45	106.28	214.94	137.85	137.1	85.02	60.11	76.31	64.25	80.85	69.44	116.14	144.55	157.83	117.11	146.08	149.6	86.52	106.85
1424098_at	Elovl7	ELOVL family member 7, elongation of long chain fatty acids (yeast)	0.0118454	0.000338	6.5	103.41	74.23	84.87	106.02	101.58	111.43	139.17	137.54	98.28	185.03	119.74	87.7	79.55	59.15	58.66	48.95	36.56	82.12	102.44	137.77	138.22	104.38	132.8	137.09	94.24	105.07
1424120_at	1300018I05Rik /// LOC100048093 /// Rnf8	RIKEN cDNA 1300018I05 gene /// similar to Ring finger protein 8 /// ring finger protein 8	0.0101977	0.000839	15.79	839.21	168.49	938.46	794.46	833.17	729.96	697.48	749.94	802.03	821.41	828.91	848.2	841.69	1030.09	1034.46	971.26	836.74	905.92	883.99	721.07	875.21	807.68	793.64	847.31	928.62	938.75
1424147_at	Ahsa1	AHA1, activator of heat shock protein ATPase homolog 1 (yeast)	0.00174853	0.00224	21.3	2164.83	588.8	2748.69	2204.19	2374.97	2185.97	2062.97	1739.32	1571.09	1668.25	1821.29	1733.81	2245.08	2153.59	2399.41	2322.73	1906.17	2160.84	2194.37	2185.88	2089.06	1840.07	1784.26	2168.83	2316.91	2731.1
1424163_at	Rmnd5b	required for meiotic nuclear division 5 homolog B (S. cerevisiae)	0.0325153	0.01	14.74	351.87	65.9	353.44	359.79	293.64	300.01	326.63	312.74	359.06	324.17	352.18	355.61	351.55	361.69	425.44	360.09	324.7	359.57	343.38	298.85	328.73	324.55	336.94	357.02	382.04	364.47
1424170_at	Phf5a	PHD finger protein 5A	0.0245422	0.0121	17.217	1036.84	165.7	1250.53	1036.99	988.22	995.47	986.5	989.62	1032.27	1108.46	984.37	1019.83	1046.12	1157.18	1242.69	1240.86	1081.15	983.24	1168.31	919.14	1028.58	942.66	1036.69	1111.35	1109.12	1211.51
1424175_at	Tef	thyrotroph embryonic factor	3.06e-06	0.000479	5.5	1930.49	749.53	1810.88	1522.55	1749.72	1778.74	1907.89	2151.45	2744.16	2179.91	2076.99	1953.1	1898.13	1539.63	1430.11	1423.28	1245.11	1495.96	1887.19	2070.84	2379.4	2483.08	2186.24	2073.63	1966.4	1968.98
1424191_a_at	Tmem41a	transmembrane protein 41a	0.0222224	0.00953	11.52	734.86	192.67	773.76	618.51	623.26	750.95	746.79	910.6	1003.85	734.5	764.01	742.22	719.3	628.32	692.64	735.23	714.68	776	826.94	757.49	713.76	815.42	714.59	695.88	620.88	673.46
1424199_at	Seh1l	SEH1-like (S. cerevisiae	0.0275363	0.00222	17.337	230.1	35.58	267.71	241.21	257.16	217.31	200.16	223.81	229.54	261.23	240.21	246.73	254.74	230.65	237.67	207.79	212.76	203.01	196.55	225.25	207.56	218.38	249.25	252.31	237.33	229.15
1424211_at	Slc25a33	solute carrier family 25, member 33	0.000580035	0.000322	9.16	1221.11	333.95	1360.95	1082.46	1201.36	1130	1122.96	1323.1	1361.7	1343.27	1335.83	1494.96	1500.7	1151.37	952.34	923.94	852.64	875.36	1067.68	1155.04	1126.69	1240.87	1355.99	1520.54	1486.71	1432.02
1424235_at	Ormdl2	ORM1-like 2 (S. cerevisiae)	0.029504	0.00523	14.58	212.14	78.37	245.19	221.87	201.41	196.76	213.43	181.13	272.33	206.06	203.95	213.65	204.08	314.38	297.14	286.58	276.47	210.85	194.8	181.34	157.64	161.77	214.38	207.34	229.6	227.52
1424286_at	Prkx	protein kinase, X-linked	0.0108318	0.0184	8.09	111.33	35.69	110.66	95.42	96.48	128.82	100.51	112.18	137.67	132.66	126.43	121.84	108.73	111.31	82.94	98.36	117.38	102.06	111.35	119.14	103.31	128.56	154.33	127.26	108.98	111.03
1424289_at	Osgin2	oxidative stress induced growth inhibitor family member 2	0.001687	0.00164	13.87	331.42	77.41	340.22	330.8	340.44	303.79	283.56	304.58	316.3	361.48	347.31	363.83	372.48	431.39	404.92	323.63	332.04	332.05	276.58	316.72	330.61	311.68	322.92	324.24	382.47	338.71
1424291_at	Nup93	nucleoporin 93	0.00110945	0.000561	15.71	224.64	122.58	276.32	226.07	235.66	211.52	157.63	164.01	222.31	188.83	199.41	223.21	267.97	402.78	363.68	372.95	372.04	267.23	231.18	174.4	203.86	219.01	201.56	210.47	259.63	250.94
1424299_at	Oma1	OMA1 homolog, zinc metallopeptidase (S. cerevisiae)	0.0140665	0.0068	18	163.6	55.59	212.5	164.58	155	195.31	129.92	165.54	167.98	139.48	131.87	126.83	149.85	214.72	238	195.04	210.91	194.65	162.63	159.44	184.59	147.52	127.54	136.25	157.64	181.14
1424318_at	1110067D22Rik	RIKEN cDNA 1110067D22 gene	7.99e-05	0.000312	16.61	1963.48	553.92	2298.94	2208.43	2054.16	1985.1	1695.82	1786.18	1942.94	1774.49	1837.47	1984.02	2079.91	2661.64	2325.98	2313.93	2376	2120.6	1856.29	1650.86	1668.76	1791.52	1553.79	1683.31	1866.26	1990.16
1424319_at	Oraov1	oral cancer overexpressed 1	0.00348914	0.000471	15.39	149.85	69.52	174.08	165.36	154.66	124.76	119.66	119.93	144.73	137.58	134.48	151.38	153.4	204.07	258.7	228.85	210.84	166.03	143.83	121.37	147.48	148.32	136.6	139.14	171	152.26
1424341_s_at	LOC100046214 /// Pcdha1 /// Pcdha10 /// Pcdha11 /// Pcdha12 /// Pcdha2 /// Pcdha3 /// Pcdha4 /// Pcdha5 /// Pcdha6 /// Pcdha7 /// Pcdha8 /// Pcdha9 /// Pcdha@ /// Pcdhac1 /// Pcdhac2 /// Pcdhgb2	similar to protocadherin alpha 11 /// protocadherin alpha 1 /// protocadherin alpha 10 /// protocadherin alpha 11 /// protocadherin alpha 12 /// protocadherin alpha 2 /// protocadherin alpha 3 /// protocadherin alpha 4 /// protocadherin alpha 5 /// protoc	0.00179264	0.0018	15.06	934.17	744.37	1183.88	1165.66	995.1	915.69	831.99	869.9	1089.15	796.58	792.69	872.75	1061.48	1646.68	2271.17	1608.65	1593.46	1127.48	919.2	796.99	786.44	844.27	782.42	820.55	1021.77	949.14
1424355_a_at	Sin3b	transcriptional regulator, SIN3B (yeast)	3.84e-06	0.000252	11.52	562.43	173.31	584.3	506.41	457.72	526.94	537.72	614.34	621.7	798.73	690.83	699.71	583.43	548.41	452.12	477.22	506.84	463.43	554.63	545.52	570.22	595.43	678.23	683.38	589.69	532.58
1424366_at	Dolk	dolichol kinase	0.000808432	0.000441	11.64	568.28	115.3	576.91	556.59	565.63	570.92	546.39	648.98	638.88	633.66	668.94	593.34	548.76	560.64	500.11	438.34	504.96	517.56	561.79	612.88	664.51	571.51	626.95	584.88	494.06	512.96
1424381_at	Sf4	splicing factor 4	2.64e-05	0.000503	10.48	582.95	161.33	552.95	503.6	592.68	546.46	548.31	644.48	757.49	746.61	661.07	632.84	524.1	434.82	563.95	566.23	558.09	544.84	635.35	668.33	696.88	717.91	651.4	623.47	573.22	517.48
1424383_at	Tmem51	transmembrane protein 51	2.96e-05	0.0128	3.25	476.72	772.61	438.48	600.92	514.96	650.99	594.89	667.11	1029.5	250.25	207.69	191.38	228.85	695.09	714.28	1165.66	1660.69	994.82	649.34	428.37	314.22	227.23	192	115.46	179.44	259.67
1424399_at	Uck1	uridine-cytidine kinase 1	0.0107961	0.00498	16.69	420.81	85.48	487.55	414.77	407.35	422.79	383.07	384.95	451.23	420.85	429.12	392.02	421.96	470.17	490.15	466.79	486.41	369.36	390.37	404.14	321.54	353.53	420.77	405.57	451.4	492.51
1424403_a_at	Rufy3	RUN and FYVE domain containing 3	0.000258833	0.000572	18	2517.01	391.53	2836.75	2906.02	2686.14	2475.18	2487.12	2371.86	2719.32	2379.26	2313.42	2411.43	2505.01	2844.85	2981.5	2989.69	2849.58	3096.49	2677.91	2435.41	2529.02	2423.88	2405.23	2323.18	2470.6	2659.46
1424412_at	Ogfrl1	opioid growth factor receptor-like 1	0.0420344	0.00123	13.84	2345.05	725.6	2501.81	2763.75	2175.73	2153.21	2044.31	2143.62	2859.92	2235.44	2261.5	2579.67	2506.49	3381.46	3096.86	2870.47	2882.89	2973.84	2286.43	1930.26	2011.48	2061.72	2238.52	2131.22	2403.67	2493.99
1424418_at	Slc25a38	solute carrier family 25, member 38	7.35e-05	0.00138	19.43	180.67	69.22	266.39	211.61	185.09	173.48	185.48	171.41	130.81	160.54	171.85	182.05	200.37	192.05	218.31	197.2	164.97	181.11	164.29	157.02	154.59	127.95	177.93	180.23	186.44	210.36
1424425_a_at	Mtap	methylthioadenosine phosphorylase	0.0259838	0.0151	16.54	350.62	86.66	410.36	427.77	400.18	349.19	345.17	340.98	294.03	359.01	396.03	338.15	352.05	441.7	395.96	371.48	463.37	402.67	336.68	339.7	375.72	308.16	290.04	339.19	306.55	347.19
1424427_at	Tada1l	transcriptional adaptor 1 (HFI1 homolog, yeast) like	0.000456143	0.000955	21.49	919.2	146.49	1053.75	952.16	1033.85	1026.63	875.85	860.13	760.77	813.67	931.62	898.5	1037.28	971.44	955.34	903.33	942.2	917.29	800.54	870.75	830.89	900.82	854.3	921.11	1046.56	1015.88
1424434_at	BC024814	cDNA sequence BC024814	0.017202	0.00691	13.46	475.78	165.11	557.62	397.83	427.81	442.36	447.18	544.72	389.11	517.57	633.75	539.47	497.67	342.22	373.07	325.18	303.52	383.43	470.85	485.74	480.71	508.89	511.98	620.7	463.02	485.59
1424440_at	Mrps6	mitochondrial ribosomal protein S6	0.00742603	0.0025	17.456	1090.81	335.11	1437.42	1115.23	1030.83	1045.58	1031.2	1031.24	1168.52	1088.06	941.41	997.66	1055.57	1288.35	1522.58	1473.34	1387.4	1206.65	1289.84	852.37	987.38	947.67	1016.87	1093.55	1188.38	1243.38
1424452_at	Sltm	SAFB-like, transcription modulator	0.0161016	0.0234	16.8	947.79	210.11	954.78	844.5	950.31	831.18	849.26	862.95	945.27	802.04	808.62	858.36	891.72	996.03	1200.9	1222.27	1022.76	1121.23	952.43	925.51	1048.98	1001.06	933.5	944.97	1011.01	952.69
1424481_s_at	Armcx5	armadillo repeat containing, X-linked 5	0.0162158	0.00336	11.94	339.82	151.84	297.82	321.79	358.52	344.98	334.87	394.35	312.79	453.22	510.44	492.97	416.2	249.74	251.4	206.77	307.33	248.37	332.55	416.05	314.89	365.67	371.42	401.26	344.78	287.5
1424495_a_at	Cklf	chemokine-like factor	0.00278361	0.00134	16.38	147.76	72.39	180.09	148.17	146.08	154.06	120.83	85.15	125.38	149.75	146.18	147.34	183.45	229.92	211.96	168.79	209.13	123.05	147.35	133.87	144.13	124.09	134.57	155.54	179.95	155.41
1424500_at	Utp6	UTP6, small subunit (SSU) processome component, homolog (yeast)	0.0344394	0.0184	20.89	104.72	35.34	119.81	105.52	113.22	122.18	94.18	70.5	102.72	79.6	104.28	92.48	120.24	141.18	93.9	110.01	102.42	105.15	93.31	92.31	80.88	105.98	89.07	113.02	107.97	107.95
1424501_at	Utp6	UTP6, small subunit (SSU) processome component, homolog (yeast)	0.00776849	0.00281	20.77	647.62	115.06	701.88	690.74	688.67	652.54	578.8	562.83	638.5	576.68	615.99	535.87	645.09	620.45	765.99	736.69	696.37	714.01	621.62	647.61	590.12	658.12	606.89	647.64	669.36	650.72
1424517_at	Ccdc12	coiled-coil domain containing 12	0.00869143	0.00497	17.223	121.65	52.24	172.38	129.08	121.51	114.65	106.58	95.12	112.5	136.12	127.89	119.33	129.18	121.79	166.85	149.96	134.75	97.15	132.93	107.48	67.9	99.78	103.82	121.11	130.59	136.5
1424588_at	Srgap3	SLIT-ROBO Rho GTPase activating protein 3	0.00428478	0.00128	18	2913.16	826.18	2947.46	3039.86	2974.2	3075.25	2648.73	2670.85	2904.95	2538.21	2355.61	2506.89	2711.04	3518.79	4007.97	3852.42	3803.51	3281.98	3040.6	2827.24	2921.37	2981.55	2591.28	2664.64	2827.61	2897.24
1424610_at	Trub2	TruB pseudouridine (psi) synthase homolog 2 (E. coli)	0.00745808	0.00889	14.13	373.9	86.45	323.74	353.7	318.31	291.24	339.57	373.78	415.48	381.43	399.8	430.11	377.72	419.27	268.7	299.33	383.28	290.92	363.03	427.42	382.88	441.59	374.82	368.43	374.03	359.61
1424611_x_at	Trub2	TruB pseudouridine (psi) synthase homolog 2 (E. coli)	0.00303297	0.027	8.32	497.52	93.29	435.99	470.99	384.33	446.81	466.88	471.55	529.21	524.46	553	498.99	514.58	519.79	403.39	425.4	498.4	463.92	494.59	486.26	506.6	496.64	502.5	567.43	570.91	510.26
1424613_at	Gprc5b	G protein-coupled receptor, family C, group 5, member B	0.0116193	0.0039	23.26	1866.64	453.42	1915.31	2104.26	2087.26	1999.78	1702.71	1759.1	1737.48	1830.14	1513.77	1579.06	1793.79	2073.99	1615.56	2306.53	2420.61	1989.47	1876.79	1863.58	1922.81	1671.06	1669.83	1863.62	1869.66	1975.14
1424620_at	Nop16	NOP16 nucleolar protein homolog (yeast)	0.000418224	0.000985	18	467.34	117.66	564.51	466.59	471.38	468.08	454.18	360.43	470.14	458.26	446.47	429.88	513.49	531.72	523.84	547.41	512.23	472.66	461.42	433.91	329.18	412.65	443.38	442.94	491.2	528.5
1424652_at	Fam176a	family with sequence similarity 176, member A	0.0352562	0.00915	13.59	341.43	116.34	302.11	370.75	357.85	252.46	311.71	356.23	336.19	423.73	476.08	470.21	338.4	333.85	257.05	297.82	379.36	269.07	243.4	297.42	360.2	375.2	364.29	461.31	344.46	284.22
1424656_s_at	Usp19	ubiquitin specific peptidase 19	0.000402356	0.0142	11.42	302.67	72.37	301.8	269.35	253.72	293.06	298.85	310.09	309.99	327.83	318.74	319.12	266.83	271.67	290	294.88	257.39	283.05	337.64	354.54	378.29	398.46	393.95	348.99	303.54	290.45
1424683_at	Fam134b	family with sequence similarity 134, member B	0.00232657	0.00172	6.4	4622.3	687.64	4221.73	4369.21	4650.5	5047.29	4924.97	5017.33	4919.54	4719.8	4713.21	4411.39	4705.64	4274.29	3672.01	3913.74	4242.28	4663.56	4685.57	4841.56	4658.05	4594.09	4485.73	4356.57	4393.71	4472.66
1424723_s_at	Cstf3	cleavage stimulation factor, 3' pre-RNA, subunit 3	0.00116683	0.00605	1.89	744.47	242.04	703.02	745.13	743.8	780.27	749.15	692.41	848.85	626.64	607.09	588.98	528.15	842.05	802.2	812.56	877.46	1012.24	764.94	750.24	722.5	754.93	615.56	558.4	530.39	635.79
1424728_at	BC011248	cDNA sequence BC011248	0.00876514	0.0097	19.63	314.26	68.38	394.97	339.57	322.36	307.77	304.27	267.65	258.2	333.84	272.7	314.37	331.04	362.6	336.72	355.35	313.25	263.78	335.23	286.62	305.11	311.67	314.15	334.37	303.57	360.81
1424732_s_at	Tmem192	transmembrane protein 192	0.0383005	0.00346	5.7	455.67	147.04	484.41	411.33	458.97	452.38	446.15	495.01	380.85	531.27	540.81	476.22	409.56	263.43	304.4	310.68	298.47	341.52	478.03	485.23	557.52	494.57	481.1	551.79	445.08	446.18
1424740_at	Creb3	cAMP responsive element binding protein 3	0.00331648	0.00382	5.9	649.97	98.02	667.16	559.71	570.86	582.49	625.85	690.29	740.66	738.86	693.21	672.63	623.21	544.63	574.72	615.73	565.59	547.25	673.67	659.33	628.76	642.97	656.97	709.23	688.42	672.47
1424741_s_at	Creb3	cAMP responsive element binding protein 3	0.00225041	0.00163	9.14	873.09	180.58	878.52	815.16	787.52	852.95	839.39	998.25	1107.39	1037.05	936.86	904.74	843.95	814.33	869.28	837.56	746.24	786.78	912.49	914.87	899.19	900.79	876.14	946.17	870.03	858.11
1424764_at	Sez6l	seizure related 6 homolog like	0.000743515	0.00194	20.06	931.66	184.17	1024.39	1008.8	979.25	1148.32	893.22	891.21	844.17	859.81	895.17	913.7	804.48	941.2	946.66	1093.79	1088.3	1093.23	992.46	945.02	975.76	922.13	910.39	779.99	833.7	899.44
1424786_s_at	Wdr45	WD repeat domain 45	0.000995913	0.00186	9.16	514.95	96.48	493.67	460.29	466.46	514.93	485.17	583.61	575.8	579.92	570.33	514.98	492.52	396.51	534.9	440.83	467.61	439.32	556.14	533.76	589.46	569.67	517.28	531.42	499.24	496.73
1424802_a_at	3300001P08Rik	RIKEN cDNA 3300001P08 gene	0.00291137	0.00736	16.21	6069.26	1198.29	5587.74	5480.48	5672.32	5508.44	5632.06	5225.59	5905.73	5076.04	5164.71	5612.09	6353.61	6419.68	7073.06	7472.62	7158.53	7349.47	6517.57	6060.59	6159.5	6099.5	6077.94	5553.72	6702.3	6546.11
1424826_s_at	Mtss1	metastasis suppressor 1	0.0308615	0.00102	16.52	546.02	351.55	575.63	607.59	508.42	525.16	516.24	406.2	599.27	390.67	478.75	426.86	460.15	709.54	1093.76	886.38	911.67	758.44	594.29	553.68	538.35	517.54	498.2	476.09	585.43	559.66
1424847_at	Nefh	neurofilament, heavy polypeptide	9.11e-05	0.000641	20.23	867.3	392.3	1188.47	1103.14	1017.81	859.89	747.58	895.74	446.94	697.55	803.62	703.96	890.66	1032.1	1231.54	1049.43	970.71	936.45	862.32	746.29	872.28	720.46	696.9	833.35	858.56	990.54
1424885_at	Klhdc8a	kelch domain containing 8A	0.0232283	0.0231	18.247	217.28	122.9	258.68	215.7	253.84	217.94	174.84	165.25	119.43	203.81	218.16	206.19	261.17	365.23	311.56	208.5	216.62	162.69	183.44	229.91	271.43	177.7	177.65	234.51	219.61	286.85
1424896_at	Gpr85	G protein-coupled receptor 85	0.0191634	0.0151	15.78	858.96	286.61	860.08	998.89	984.33	867.04	910.9	771.94	782.18	817.89	889.07	888.95	1006.63	1155.9	994.19	872.04	1162.95	841.48	764.18	811.9	589.74	806.19	781.44	774.17	799.96	857.84
1424905_a_at	Slc39a11	solute carrier family 39 (metal ion transporter), member 11	0.014398	0.012	16.34	364.44	77.72	401.05	321.57	396.34	358.95	342.28	365.14	359.84	407.49	380.36	416.71	405.78	353.25	326.11	311.33	310.69	361.8	350.57	362.92	466.13	434.32	386.27	441.08	363.74	379.97
1424955_at	Ccdc5	coiled-coil domain containing 5	0.000461053	0.000818	9.58	303.67	89.9	300.48	267.29	287.33	289.68	306.87	352.42	371.13	395.94	351.97	346.3	260.45	216.13	258.32	292.72	288.83	294.46	314.85	335.88	318.75	337.8	319.1	344.49	268.91	295.25
1424970_at	Purg	purine-rich element binding protein G	0.0246187	0.00452	15.66	791.73	223.14	761.43	846.15	846.17	759.24	802.1	748.84	802.91	677.65	720.56	794.97	878.68	1064.34	873.57	1056.5	1012.03	979.51	784.32	729.64	741.58	710.36	772.31	618.07	935.16	788.48
1424982_a_at	2700078E11Rik	RIKEN cDNA 2700078E11 gene	0.009044	0.00819	21.19	100.92	33.17	109.02	106.89	131	100.57	107.29	66.05	93.94	94.55	86.23	92.84	120.32	132.39	86.5	129.11	104.66	107.76	78.22	87.07	79.74	85.55	101.27	87.79	106.92	125.41
1425011_x_at	Stx18	syntaxin 18	0.00457031	0.00459	20.49	903.44	128.9	984.35	904.72	942.71	902.16	838.61	776.95	817.81	847.07	792.43	916.53	964.74	895.42	922.65	935.2	846.7	888.71	862.26	825.12	923.88	905.23	849.16	918.67	944.69	1034.75
1425021_a_at	Pex16	peroxisomal biogenesis factor 16	8.4e-05	0.000887	10.51	235.78	62.64	243.89	225.55	210.62	230.29	236.53	266.95	256.93	306.68	287.41	235.04	221.92	201.82	209.18	181.39	211.8	208.9	251.85	260.43	257.8	242.19	263.06	266.49	224.06	220.39
1425045_at	Jmjd7 /// Pla2g4b	jumonji domain containing 7 /// phospholipase A2, group IVB (cytosolic)	0.0087455	0.00541	13.09	114.1	27.3	117.28	101.62	108.4	113.06	114.08	121.49	110.61	137.25	144.34	133.59	122.61	106.09	89.75	114.11	97.32	113.88	114.26	116.56	113.84	134.57	121.21	113.71	113.41	114.29
1425048_a_at	ENSMUSG00000060128 /// Hmgb1 /// LOC100045876 /// LOC100045972 /// LOC100048378 /// OTTMUSG00000007516 /// OTTMUSG00000020977	predicted gene, ENSMUSG00000060128 /// high mobility group box 1 /// similar to high-mobility group box 1 /// similar to high mobility group box 1 /// similar to high-mobility group box 1 /// predicted gene, OTTMUSG00000007516 /// predicted gene, OTTMUSG0	0.00821593	0.0109	18.271	5036.75	1360.83	5955.66	5738.31	5309.08	5038.42	5216.25	5043.27	5319.59	4699.06	5035.07	4641.32	4794.58	5539.19	7009.24	5855.83	6189.39	5425.07	4864.32	4852.28	4287.58	4956.33	4945.08	4991.21	4831.31	4803.68
1425099_a_at	Arntl	aryl hydrocarbon receptor nuclear translocator-like	0.000180993	0.000183	14.81	755.36	545.86	929.88	845.49	750.65	757.56	623.56	604.9	751.81	612.95	700.14	838.82	1077.25	1644.21	1585.62	1366.87	1294.55	1028.49	753.16	594.65	552.48	636.98	630.96	703.42	1062.4	828.66
1425134_a_at	Pigx	phosphatidylinositol glycan anchor biosynthesis, class X	0.0185131	0.00672	15	377.17	99.77	398.99	374.21	370.57	401.77	340.27	349.66	386.38	377.22	377.13	384.48	396.23	492.8	402.03	381.33	412.07	376.46	370.7	293.26	319.94	344.63	328.18	398.84	373.69	402.71
1425157_x_at	Tspan33	tetraspanin 33	0.0179184	0.0392	20.48	178.45	47.42	231.53	223.25	178.44	192.68	177.49	154.06	163.53	172.36	178.45	151.8	170.49	158.79	236.03	195.32	188.66	197.57	179.74	170.08	141.2	167.38	179.79	184.65	167.31	178.46
1436387_at	C330006P03Rik	RIKEN cDNA C330006P03 gene	0.000843093	0.0052	16.07	152.59	132.8	183.69	179.16	148.16	195.98	160.05	130.21	109.26	122	118.88	135.84	245.82	331.9	316.32	162.35	178.95	218.65	135.29	110.53	66.31	102.54	104.41	95.79	192.93	157.02
1425180_at	Sgip1	SH3-domain GRB2-like (endophilin) interacting protein 1	0.0111322	0.0102	18.287	668.71	179.15	732.24	825.2	838.45	679.93	703.19	495.37	570.8	550.44	633.91	672.19	697.32	665.23	708.19	836.25	853.67	678.6	600.3	665.13	573.54	689.46	630.99	586.8	562.14	573.78
1425181_at	Sgip1	SH3-domain GRB2-like (endophilin) interacting protein 1	3.29e-07	0.000588	20.73	1554.58	273.89	1668.37	1778.99	1801.92	1605.02	1609.26	1426.62	1418.45	1375.05	1491.15	1501.05	1581.31	1626.45	1845.43	1822.9	1771.34	1615.73	1505.94	1450.23	1297.66	1534.37	1396.53	1432.9	1441.71	1574.78
1425185_at	Fam152a	family with sequence similarity 152, member A	0.0120619	0.0036	19.81	655	96.38	691.47	691.63	730.34	653.88	572.29	538.59	575.85	566.13	627.1	650.1	659.37	633.74	666.73	680.85	731.35	692.25	644.69	592.34	669.05	671.91	578.69	626.33	656.11	678.43
1425186_at	Lmbrd1	LMBR1 domain containing 1	6.51e-05	0.000137	5.2	983.36	189.17	896.78	919.36	901.15	979.24	1031.35	1104.09	1121.78	1027.41	1073.82	1032.83	896.33	819.23	911.26	820.15	743.45	901.31	963.45	1066.95	1061.07	987.47	1054.38	1073.29	1029.42	848.85
1425194_a_at	6330577E15Rik	RIKEN cDNA 6330577E15 gene	0.000328928	0.00499	18.514	4335.38	594.21	4653.53	4544.36	4409.84	4324.54	4375.6	4241.56	4093.85	4006.22	4401.43	4357.53	4473.05	4438.95	4247.42	4805.29	4720.78	4402.06	4114.41	3937.12	3616.88	3657.03	3913.15	4058.42	4346.21	4322.95
1425264_s_at	Mbp	myelin basic protein	0.00244271	0.00529	21.22	725.14	124.39	733.14	825.59	722.7	762.8	704.65	705.35	745.89	678.39	703.04	691.19	736.45	662.6	894.06	900.47	813.21	792.98	746.32	675.46	651.73	651.69	677.41	689.93	732.77	727.57
1425281_a_at	Tsc22d3	TSC22 domain family, member 3	0.00321226	0.00909	18	862.96	533.76	1024.65	1085.58	929.29	661.89	663.85	599.26	550.09	839.91	1051.04	1432.86	1340.63	723.97	494.71	834.21	741.47	607.65	662.32	704.62	886.02	947.59	1030.31	1562.23	1407.01	1293.92
1425292_at	Dtna	dystrobrevin alpha	0.0175605	0.00339	7.3	215.75	101.04	233.21	199.47	233.56	203.43	197.38	262.99	190.48	273.11	265.09	247.22	221.64	111.06	131.11	122.38	85.83	144.64	209.86	253.22	264.75	287.91	239.34	266.44	206.48	207.03
1425296_a_at	Rgs3	regulator of G-protein signaling 3	0.000429503	0.00124	18.257	286.9	108.46	340.08	334.32	285.46	216.96	226.36	262.97	209.51	246.52	241.63	243.85	301.28	407.84	413.14	426.42	412.25	225.4	258.97	221.92	262.23	288.35	291.48	299.26	312.74	345.79
1425328_at	Fam76a	family with sequence similarity 76, member A	9.77e-07	0.00019	9.32	2249.46	488.44	2073.73	1971.7	2161.16	2206.47	2262.05	2625.03	2928.54	2750.48	2673.29	2386.2	2250.15	2157.84	1987.92	1951.67	2170.86	2248.78	2105.84	2472.02	2342.25	2497.86	2616.37	2237.92	2273.07	2136.72
1425348_a_at	Srprb	signal recognition particle receptor, B subunit	0.0471346	0.0102	14.39	226.17	55.16	244.71	226.17	214.17	211.59	219.56	226.17	247.61	232.59	213.92	224.28	226.65	272.45	299.56	241.29	231.96	224.88	222.68	191.07	189.24	204.54	226.35	237.39	226.12	249.26
1436444_at	6030405A18Rik	RIKEN cDNA 6030405A18 gene	2.62e-05	0.000232	15.46	255.43	409.94	475.42	393.6	317.57	127.36	108.58	144.41	234.12	221.12	245.59	298.78	452.76	890.38	928.46	816.84	730.27	223.94	178.72	132.22	153.81	183.29	204.65	265.27	452.91	315.5
1425439_a_at	Slc41a3	solute carrier family 41, member 3	0.0173326	0.00142	16.28	200.8	81.89	258.12	206.61	204.75	187.28	182.89	208.32	167.78	185.73	182.98	182.24	205.49	270.06	331.56	248.24	260.58	201.1	209.47	169.86	215.19	176.01	186.87	194.93	177.39	200.51
1425476_at	Col4a5	collagen, type IV, alpha 5	0.00597749	0.0109	4.5	131.06	63.29	91.93	109.03	114.23	141.24	135.81	137.34	135.23	157.46	155.23	151.12	111.06	107.72	108.87	100.82	123.39	111.14	126.9	148.73	136.83	136.64	144.06	218.51	123.62	125.17
1425482_s_at	Ankmy2	ankyrin repeat and MYND domain containing 2	0.0326514	0.000217	16.2	684.94	234.64	805.6	701.79	718.23	614.88	520.92	553.63	712.66	595.58	566.85	607.37	646.99	836.62	990.2	868.81	975.93	881.59	698.46	671.05	678.65	691.22	611.91	608	633.62	698.46
1425491_at	Bmpr1a	bone morphogenetic protein receptor, type 1A	0.0104751	0.0202	16.87	102.71	33.47	114.33	122.12	102.32	120.31	104.87	99.62	115.41	95.67	103.11	101.19	109.27	122.7	131.4	117.86	149.77	123.39	95.98	83.46	93.5	98.05	82.83	101.12	95.34	100.7
1425497_a_at	Prpf4b	PRP4 pre-mRNA processing factor 4 homolog B (yeast)	0.0188228	0.00641	19.68	406.89	105.76	432.27	447.55	445.65	478.4	373.12	338.52	405.16	310.2	357.05	378.99	449.61	373.49	415.96	521.71	470.15	444.95	408.61	385.18	480.4	402.84	332.22	312.03	379.39	421.63
1425560_a_at	S100a16	S100 calcium binding protein A16	0.00342288	0.000569	6.1	1757.67	926.3	1682.46	1640.6	1825.44	2229.69	2329.1	2807.1	1574.32	2652.44	1998.84	1670.49	1385.65	954.5	1080.29	1312.81	1150.99	1438.12	2203.66	2267.87	2297.66	1864.06	2074.25	2097.67	1586.49	1689.91
1425628_a_at	Gtf2i	general transcription factor II I	0.0296024	0.00215	15.93	3635.55	919.22	3689.86	3725.37	3505.58	3598.16	3410.39	3253.71	3887.35	3301.81	3132.71	3146.94	3541.62	4957.33	4704.73	4843.94	4529.03	4228.19	3858.22	3415.81	3672.94	3423.35	3452.95	3118.89	3721.87	3871.45
1425848_a_at	Dusp26	dual specificity phosphatase 26 (putative)	0.00105491	0.000924	5.7	2370.9	474.85	2434.28	2250.22	2351.04	2364.73	2538.6	2622.76	2737.82	2575.06	2345.91	2292.81	2081.71	1795.63	2014.77	2347.72	2233.16	2355.89	2595.36	2518.43	2745.34	2581.1	2507.44	2545.18	2351.53	2377.07
1425860_x_at	Cklf	chemokine-like factor	0.00139652	0.000817	16.92	173.59	61.1	187.8	170.2	174.49	215.03	156.66	128	165.33	172.7	157.13	176.12	221.51	238.05	245.94	218.88	226.73	181.75	171.63	171.87	154.76	123.73	169.5	171.51	208.52	200.29
1425993_a_at	Hsph1	heat shock 105kDa/110kDa protein 1	1.6e-05	0.000203	20.55	8750.42	2704.07	9946.17	9392.84	9469.31	9415.56	8129.12	7260.38	6976.13	6254.54	6232.3	6259.3	8667.95	11640.4	11519.7	10361.3	9004.03	11121	9363.99	7871.13	8513.09	7404.82	6564.06	6535.88	8832.89	10184.9
1426015_s_at	Asph	aspartate-beta-hydroxylase	0.00248862	0.00162	21.68	420.07	63.34	433.48	460	464.95	420.48	419.01	361.36	348.38	392.87	377.13	385.42	396.49	421.05	460.55	434.94	475.06	429.58	415.15	419.65	357.08	427.06	421.31	417.77	382.75	427.83
1426023_a_at	Rabep1	rabaptin, RAB GTPase binding effector protein 1	0.0153296	0.049	20	115.98	46.18	160.26	168.43	134.93	130.42	138.17	88.48	102.5	103.97	115.58	122.64	146.71	116.38	96.92	137.51	137.98	150.84	99.96	111.34	76.06	105.6	86.84	104.96	111.97	120.56
1426030_a_at	Apeh	acylpeptide hydrolase	0.00678904	0.000671	19.4	519.27	105.08	605.31	530.67	563.48	520.12	480.22	502.37	500.59	462.16	449.51	448.73	496.67	590.57	573.48	601.72	590.77	658.89	518.41	513.68	574.28	525.15	479.33	498.68	510.83	553.6
1426037_a_at	Rgs16	regulator of G-protein signaling 16	1.81e-07	0.00135	9.32	3164.26	6009.95	1280.19	1934.53	2388.85	4470.75	6157.03	8304.39	13096.2	4604.83	2949.31	2573.7	1395.98	2000.49	2613.06	2810.68	4528.49	5918.81	5337.87	4916.88	4431.98	4281.33	3379.21	1922.84	1510.97	1076.34
1426049_a_at	Terf2ip	telomeric repeat binding factor 2, interacting protein	0.0152662	0.00659	19.79	905.23	195.27	1031.26	929.14	993.16	950.31	812	776.9	689.42	762.15	842.06	894.93	966.39	884.79	1079.97	919.62	898.65	949.8	905.53	904.93	943.76	902.56	855.39	878.63	907.8	953.5
1426052_at	Mlh3	mutL homolog 3 (E coli)	0.00336199	0.0199	23.63	293.19	74.58	301.41	351.57	307.37	356.05	296.44	285.06	334.2	289.45	253.5	266.85	289.95	390.41	379.37	364.41	380.07	337.89	260.47	260.62	241.24	263.75	277	241.91	266.89	300.07
1426100_a_at	Tk2	thymidine kinase 2, mitochondrial	0.00139367	0.00181	13.4	775.47	108.89	721.1	733.31	763.9	743.48	725.37	777.87	773.49	841.58	889.7	855.89	794.16	675.18	694.35	777.45	772.99	709.89	778.1	792.93	862.76	892.97	839.41	874.28	716.87	692.72
1426232_at	BC024479	cDNA sequence BC024479	0.0138655	0.042	15.03	182.86	51.51	152.06	172.42	161.85	152.16	169	141.66	166.42	157.42	151.42	212.7	194.39	192.42	244.67	207.12	232.75	230.89	200.25	184.7	190.36	181.02	180.88	170.27	241.24	205.9
1426235_a_at	Glul	glutamate-ammonia ligase (glutamine synthetase)	0.0274151	0.00881	20.82	2089.96	738.23	2819.56	3090.87	2385.49	2210.74	2059.64	1842.48	1614.41	1820.17	2120.29	2320.27	2477.45	1938.32	1771.76	2489.96	2158.19	1708.97	1874.55	1984.07	1932.42	1850.22	2004.4	2740.87	2539.47	2592.57
1426236_a_at	Glul	glutamate-ammonia ligase (glutamine synthetase)	0.00278013	0.00114	22.86	12759.2	1994.19	13464.2	13472.8	14244.4	12762.5	12625.5	11842.2	11570.2	12778.6	10698.9	12124.5	12956.1	12303	14687.2	13374.8	13589.4	12593.4	12647.4	12756	11937.7	11660.8	12304	13612	14003.4	13424.6
1426245_s_at	Mapre2	microtubule-associated protein, RP/EB family, member 2	0.00192887	0.000289	7	1068.32	188.03	1034.37	1069.84	1066.79	1065.37	1277.87	1233.3	1135.53	1171.53	1145.97	1086	1054.36	916.66	987.46	977.04	901.82	963.26	1014.1	1200.01	1183.72	1112.3	1197.44	1114.16	1054.41	1051.01
1426279_at	5830415L20Rik	RIKEN cDNA 5830415L20 gene	0.000613505	0.0047	19.51	1165.42	248.82	1297.5	1218.73	1228.54	1260.67	1108.95	1101.36	1082.74	1044.48	1078.09	1067.11	1242.02	1315.42	1542.12	1223.98	1167.93	1178.74	1095.81	1171.69	1058.56	1162.91	1059.65	1101.85	1158.92	1205.43
1426349_s_at	Tmpo	thymopoietin	0.0450934	0.0342	15.45	461.96	115.96	535.75	523.14	506.38	461.3	455.22	461.98	568.23	461.93	447.57	431.34	519.04	613.93	554.91	484.79	563.71	486.14	452.97	413.28	403.45	406.78	394.62	382.01	456.78	492.39
1426351_at	Hspd1	heat shock protein 1 (chaperonin)	2.03e-06	0.000298	20.22	6735.19	1688.4	7712.13	7247.33	7257.52	7075.1	6246.47	5714.34	5894.1	5705.44	5758.03	6112.2	6929.63	8096.59	9082.24	7861.93	6895.22	7267.4	6716.03	6323.74	6526.92	6393.25	6035.97	6539.53	6754.35	7736.33
1426364_at	Mrrf	mitochondrial ribosome recycling factor	0.0140303	0.0478	20.37	219.55	74.76	331.77	231.63	273.59	241.51	218.78	194.24	213.83	206.84	213.91	196.49	229.4	248.96	265.36	238.39	200.05	223.41	211.16	217.89	215.38	214.9	182.24	220.32	223.27	248.75
1426367_at	Cab39l	calcium binding protein 39-like	0.0295938	0.0242	22.62	381.49	86.17	404.68	391.06	414.26	430.32	378.76	367.96	370.09	384.23	364.83	350.42	389.25	470.2	516.6	451.63	408.72	372.08	392.62	344.26	365.51	362.31	351.09	430.23	377.19	364.87
1426372_a_at	Bet1l	blocked early in transport 1 homolog (S. cerevisiae)-like	0.0041217	0.000955	6.2	477.41	90.85	468.71	440.68	472.27	402.2	519.33	561.7	537.77	541.57	527.98	526.02	478.39	414.36	414.72	393.81	437.12	380.01	476.43	481.97	517.66	450.49	503.9	558.3	500.73	445.69
1426373_at	Ski	ski sarcoma viral oncogene homolog (avian)	0.0038727	0.000472	15.2	467.79	150.59	547.52	523.04	409.5	429.76	466.32	463.5	454.55	524.39	442.45	463.65	526.98	615.09	637.25	588.29	535.94	491.64	469.26	399.06	385.12	336.06	424.48	404.51	511.08	544.99
1426383_at	Cry2 /// LOC100048334	cryptochrome 2 (photolyase-like) /// similar to mKIAA0658 protein	0.0133866	0.00803	12.05	797.8	141.43	751.11	770.55	752.57	726.84	786.1	796.5	869.75	854.33	887.45	850.21	821.91	614.66	839.31	644.99	618.9	656.01	853.49	872.45	794.37	897.52	799.09	821.63	843.17	742.61
1426402_at	Syncrip	synaptotagmin binding, cytoplasmic RNA interacting protein	0.00135888	0.00386	21.07	567.55	170.29	577.43	656.24	694.37	649.33	537.66	428.48	392.63	446.84	486.95	546.15	657.42	733.2	639.37	569.55	629.28	553.14	525.6	515.71	574.64	585.41	443.72	501.48	565.55	668.44
1426411_a_at	Strbp	spermatid perinuclear RNA binding protein	0.00203936	0.00484	18	246.69	68.19	306.24	295.85	270.52	281.04	240.22	209.8	257.96	227.02	246.3	230.62	256.52	304.94	346.18	268.09	268.31	272.69	228.63	235.06	227.86	239.59	212.23	222.92	214.3	247.07
1426437_s_at	Hdac3	histone deacetylase 3	0.0115989	0.0274	10.93	1407.36	163.38	1290.88	1223.11	1257.83	1338	1326.96	1383.22	1541.6	1433.99	1468.98	1400.7	1331.21	1260.61	1388.59	1475.63	1411.49	1403.23	1467.2	1458.98	1549.87	1519.06	1477.27	1460.16	1441.83	1367.98
1426445_at	Ctage5	CTAGE family, member 5	0.0122541	0.00909	17.48	345.83	76.35	368.43	361.88	398	364.83	326.3	282.46	374.7	349.26	342.4	315.5	377.04	403.19	435.17	388.65	373.97	325.16	306.54	314.8	298.8	342.39	307.2	331.57	334.66	356.64
1426447_at	Nup35	nucleoporin 35	0.0348923	0.000949	13.25	534.51	270.26	664.87	538.92	462.76	490.25	426.38	492.06	699	522.24	481.78	572.47	675.96	923.73	791.38	734.33	799	530.1	561.39	383.21	424.97	442.06	461.05	453.93	643.93	568.65
1426452_a_at	Rab30	RAB30, member RAS oncogene family	0.000379973	0.00131	17.253	105.18	44.4	127.36	123.71	115.64	106.37	100.07	86.48	104.41	105.49	99.89	112.54	129.94	166.66	103.66	104.87	105.74	103.06	81.17	84.76	77.85	90.01	88.76	105.61	115.81	124.74
1426462_at	Gphn	gephyrin	0.000419669	0.000521	18.801	1527.98	273.14	1580.94	1552.84	1670.58	1584.89	1413.13	1301.04	1382.17	1417.67	1464.08	1406.8	1511.25	1740.06	1847.32	1670.9	1681.93	1710.35	1606.61	1523.01	1323.87	1532.95	1434.75	1504.77	1498.71	1621.24
1426463_at	Gphn	gephyrin	0.000875421	0.000521	18	402.69	121.92	500.89	470.57	407.62	430.06	363.86	331.73	388.8	325.47	362.53	384.13	389.22	472.25	569.31	494.57	445.79	495.84	428.03	369.98	397.76	424.93	374.55	374.64	376.25	425.34
1426480_at	Sbds	Shwachman-Bodian-Diamond syndrome homolog (human)	0.011021	0.00522	12.41	1371.04	184.27	1479.69	1323.12	1287.38	1222.89	1331.62	1452.78	1471.17	1509.13	1407.08	1515.16	1374.86	1194.45	1294.15	1291.02	1182.74	1146.62	1366.2	1415.87	1431.98	1399.17	1338.7	1486.78	1423.94	1367.22
1426504_a_at	Rnf121	ring finger protein 121	0.0116248	0.00387	18.22	559.87	94	637.13	572.94	541.33	547.74	504.48	504.23	509.33	601.84	564.98	556.78	562.96	608.4	649.85	472.42	478.19	461.86	523.52	492.92	576.43	583.2	544.87	578.62	618.22	618.5
1426584_a_at	Sord	sorbitol dehydrogenase	0.0132492	0.0079	8	319.49	174.25	320.74	305.79	318.24	297.53	327.82	372.36	613.28	425.3	358.73	350.62	274.54	271.87	306.18	266.86	292.61	264.77	308.03	344.83	330.45	363.36	360.22	324.72	290.39	305.74
1426592_a_at	Fbxo22	F-box protein 22	0.00668182	0.00174	15.55	323.88	68.35	382.23	316.28	319.38	311.69	316.82	292.17	334.28	310.9	340	323.1	364.27	380.6	375.51	355.54	358.98	297.7	325.75	318.01	245.52	289.54	324.66	300.59	327.12	369.25
1426640_s_at	Trib2	tribbles homolog 2 (Drosophila)	0.00286574	0.000604	21.65	1316.39	346.14	1334.16	1307.92	1406.94	1409.81	1122.92	1011.61	916.82	988.82	996.72	991.53	1325.78	1573.67	1582.41	1349.71	1364.55	1609.1	1324.85	1281.09	1301.63	1204.78	1144.72	1139.36	1514.15	1480.74
1426645_at	Hsp90aa1	heat shock protein 90, alpha (cytosolic), class A member 1	1.92e-05	0.00356	20.1	12517.2	3593.79	14519.1	16350.2	14094.6	14129.3	13811.9	12170.5	15103.4	10370	11777.9	11599.7	12382.7	15125.6	16814	17557.6	16166.1	15325.5	12651.7	11974.8	11470.5	10653.5	10795	10859.3	11484.5	12226.4
1426683_at	Cnot6 /// LOC100046343	CCR4-NOT transcription complex, subunit 6 /// similar to CCR4-NOT transcription complex, subunit 6	0.00930588	0.00904	19.72	426.39	147.24	415.79	472.07	429.3	465.27	435.53	357.49	423.48	388.22	337.23	415.83	471.03	631.7	447.76	462.43	496.51	473.38	346.32	346.75	343.43	410.39	346.54	355.32	453.55	482.28
1426693_x_at	Cox15	COX15 homolog, cytochrome c oxidase assembly protein (yeast)	0.00463774	0.00156	17.725	248.33	103.43	277.64	279.77	284.3	226.83	232.72	171.81	218.08	196.25	243.76	239.2	257.71	284.65	378.68	338.35	317.97	295.22	203.99	269.01	228.74	246.22	250.44	227.51	271.57	245.09
1426698_a_at	Hnrnpm	heterogeneous nuclear ribonucleoprotein M	5.39e-05	0.000539	18.532	1387.28	472.71	1420.31	1457.12	1475.88	1580.23	1227.75	1168.75	1247.26	1057.96	1121.05	1149.2	1518.7	2003.38	1892.11	1713.35	1597.61	1566.97	1354.26	1272.98	1288.07	1222.07	1101.09	1103.55	1424.99	1527.91
1426711_at	Tmco3	transmembrane and coiled-coil domains 3	0.0154746	0.00875	20.67	382.13	50.33	438.03	403.56	395.94	416.18	337.38	343.17	401.1	341.48	347.22	368.81	375.47	413.14	427.13	381.66	382.6	415.23	410.78	341.94	374.05	371.15	367.83	358.1	404.22	425.38
1426718_at	Skiv2l2	superkiller viralicidic activity 2-like 2 (S. cerevisiae)	5.57e-05	0.00128	21.42	1393.48	214.52	1660.17	1448.09	1473.1	1489.56	1371.08	1329.69	1394.26	1231.13	1346.71	1290.79	1437.92	1470.86	1584.45	1574.24	1417.23	1352.96	1288.93	1360.64	1255.96	1376.07	1287.63	1392.7	1540.84	1584.26
1426734_at	Fam43a	family with sequence similarity 43, member A	0.00169906	0.000666	14.48	1164.96	1948.49	1418.42	1587.12	947.48	1093.67	920.31	1001.15	1684.55	808.35	846.06	1236.24	2007.56	4229.44	3512.71	3114.22	3541.31	1662.46	983.63	561.63	332.45	590.85	741.12	883.11	1806.52	1299.74
1426748_s_at	Abcf3	ATP-binding cassette, sub-family F (GCN20), member 3	0.0436703	0.0437	19.24	117.33	34.46	169.6	121.44	134.02	160	116.63	114.53	126.66	100.68	103.07	115.78	156.66	167.67	162.53	118.03	123.89	141.37	108.96	116.14	112.85	101.82	110.9	112.46	138.72	110.95
1426749_at	Prmt3	protein arginine N-methyltransferase 3	0.0224684	0.00918	20.07	582.37	128.77	634.34	618.3	646.54	614.92	575.34	562.39	553.55	547.88	518.64	553.74	589.39	776.18	660.45	592.98	676.87	753.49	572.06	553.66	654.71	540.67	567.79	543.87	573.29	673.46
1426765_at	Commd7 /// LOC674161	COMM domain containing 7 /// similar to COMM domain-containing protein 7	0.0330262	0.00657	17.193	652.96	120.31	711.96	653.59	584.38	661.15	643.1	595.13	652.34	672.84	608.58	615.33	648.32	677.73	761.7	804.31	731.75	618.72	670.24	598.15	587.17	563.69	618.95	677.2	667.59	673.82
1426768_at	Msl3l2	male-specific lethal 3-like 2 (Drosophila)	0.0311001	0.0208	17.46	544.17	126.72	602.93	592.95	542.38	563.17	536.41	536.47	559.41	544.36	523.02	520.72	521.76	622.25	743.5	616.63	552.15	587.7	543.98	512.11	532.02	490.06	538.03	577.22	525.76	557.51
1426848_at	LOC100047481 /// Sec24b	similar to SEC24 related gene family, member B (S. cerevisiae) /// Sec24 related gene family, member B (S. cerevisiae)	0.0197256	0.00171	17.718	252.61	66.83	266.55	268.93	238.71	255.63	211.87	212.37	249.6	211.97	218.67	217.92	236.32	285.62	345.54	344.13	288.28	286.73	247.91	265.89	264.21	234.54	231.66	221.06	282.87	260.1
1426879_at	1190005F20Rik	RIKEN cDNA 1190005F20 gene	1.53e-05	0.000265	16.67	499.9	166.45	578.62	511.22	541.17	487.86	475.81	421.18	485.03	475.29	476.9	511.9	593.61	711.29	697.13	598.89	593.05	517.31	488.59	440.39	378.39	436.75	478.67	432.31	617.4	590.44
1426884_at	Rmnd5a	required for meiotic nuclear division 5 homolog A (S. cerevisiae)	0.00232325	0.000455	15.01	1614.13	365.47	1668.31	1838.58	1702.23	1676.83	1417.31	1553.45	1703.1	1440.05	1545.06	1622.01	1672.77	2103.13	2138.21	2100.57	2148.25	1891.66	1559.19	1419.02	1505.14	1520.41	1432.61	1455.18	1498.84	1606.25
1426894_s_at	Fam102a	family with sequence similarity 102, member A	0.00193818	0.00326	5.1	612.21	149.42	590.27	554.25	596.13	621.23	606.96	648.18	558.78	736.32	654.14	625.33	593.7	464.81	542.12	495.87	489.53	530.23	599.5	763.66	747.52	691.91	695.31	623.1	637.03	617.47
1426908_at	Galnt7	UDP-N-acetyl-alpha-D-galactosamine: polypeptide N-acetylgalactosaminyltransferase 7	0.0027285	0.000578	14.51	219.66	151.13	253.11	296.43	200.54	208.28	211.24	177.03	253.31	192.78	198.72	251.7	281.12	463.04	426.93	328	361.93	258.18	201.4	169.65	170.42	176.85	186.8	160.79	271.38	228.08
1426912_at	EG621205 /// Rfwd2	predicted gene, EG621205 /// ring finger and WD repeat domain 2	0.0036749	0.00901	22.33	1308.04	293.7	1614.54	1475.23	1445.81	1504.83	1208.21	1268	1341.76	1027.14	1139.28	1150.21	1294.73	1353.09	1521.05	1284.26	1281.81	1446.82	1227.3	1178.07	1321.72	1168.41	1195.91	1321.35	1325.44	1365.67
1426923_at	Agfg1	ArfGAP with FG repeats 1	0.000205067	0.00254	21.12	626.1	112.84	697.94	703.18	744.72	728.71	612.23	571.59	551.33	573.58	602.34	590.35	740.26	723.64	737.92	611.31	735.91	771.29	595.41	589.33	639.97	545.6	574.85	593.23	688.78	705.61
1426940_at	Sidt2	SID1 transmembrane family, member 2	0.0108053	0.0368	8.2	260.94	57.92	196.13	207.13	219.65	225.61	256.78	271.66	305.75	265.26	262.03	244.02	244.39	228.75	274.84	249.05	261.13	236.15	285.66	276.96	311.96	272.09	308.07	280.08	260.76	260.27
1426957_at	Trp53bp1	transformation related protein 53 binding protein 1	0.000738127	0.000478	20.6	1108.39	303.03	1193.39	1201.87	1154.86	1111.3	1054.21	922.58	930.45	819.96	890.66	963.84	987.6	1127.4	1426.02	1329.06	1158.06	1254.13	1099.02	1114.85	1057.19	1108.07	1101.99	946.51	1108.71	1168.52
1427005_at	Plk2	polo-like kinase 2 (Drosophila)	0.00222932	0.015	9.56	419.21	471.89	310.42	289.84	299.5	439.67	432.38	570.7	1194.09	694.5	459.9	323.24	275.24	375.96	450.5	389.71	377.96	471.21	431.38	407.04	526.39	599.55	508.15	336.85	265.54	250.3
1427043_s_at	Enox2	ecto-NOX disulfide-thiol exchanger 2	0.000755057	0.00449	9.34	361.38	281.81	316.13	349.38	296.78	360.73	440.55	607.63	831.39	497.27	432.34	320.16	286.73	356.4	323.2	341.22	410.95	362.03	397.92	416.77	405.94	445.76	439.65	312.64	268.85	267.76
1427049_s_at	Smo	smoothened homolog (Drosophila)	0.0288625	0.00292	14.44	546.09	246.04	607.8	570.97	538.04	539.09	495.55	520.96	610.02	614.35	466.09	541.24	544.28	843.47	883.81	864.57	893.79	629.74	529.54	455.82	401.7	499	496.77	570.42	547.9	574.08
1427069_at	Fbxo28	F-box protein 28	9.82e-05	0.000233	6.2	540.64	126.71	479.45	471.49	535.45	580.37	646.55	611.34	653.86	584.73	527.2	560.44	447.44	400.44	461.95	462.02	466.45	541.8	551.91	599.49	542.42	624.33	568.71	539.27	535.93	539.49
1427097_at	Wwp1	WW domain containing E3 ubiquitin protein ligase 1	0.0180266	0.0124	21.47	221.84	54.35	278.12	256.07	275.66	270.97	209.65	182.67	212.13	186.63	197.04	224.78	266.31	288.17	218.23	272.66	218.9	204.07	213.08	179.47	236.78	233.47	195.06	238.89	198.81	265.35
1427104_at	Zfp612	zinc finger protein 612	2.68e-07	0.00038	9.67	1962.46	614.08	1444.24	1639.35	1619.32	1737.78	2040.93	2404.63	2672.41	2114.52	2108.67	2074.77	1637.48	1486.56	1693.56	1883.99	1855.89	2066.05	2127.01	2215.16	2210.47	2187.91	2076.27	1856.59	1718.92	1670.71
1445669_at	Spry4	sprouty homolog 4 (Drosophila)	0.0376619	0.00245	6.1	202.67	111.75	131.27	208.79	230.65	239.66	295.2	252.87	189.98	245.14	213.92	222.26	195.27	95.83	78.13	71.71	107.17	203.73	205.96	256.75	191.8	227.57	199.71	173.12	179.3	201.61
1427134_at	Sfrs12	splicing factor, arginine/serine-rich 12	0.0260774	0.00177	17.44	970.65	279.93	881.16	969.22	1036.87	951.68	919.09	833.38	972.08	801.23	804.7	930.16	1056.99	1246.5	1304.03	1358.78	1274.2	1337.42	1071.96	904.94	834.32	1031.11	924.31	798.92	1165.56	1093.98
1427146_at	Atpgd1	ATP-grasp domain containing 1	0.0267712	0.0012	6.2	130.86	60.67	140.56	99.46	106.65	171.2	133.08	138.86	125.18	171.98	141.66	128.63	114.28	62.92	85	84.65	50.63	78.07	123.96	142.43	168.78	145.57	148.68	154.66	143.31	121.74
1427200_at	Ctbp2 /// Zranb1	C-terminal binding protein 2 /// zinc finger, RAN-binding domain containing 1	0.00230077	0.00724	12.02	484.39	79.09	428.75	479.75	488.72	480.15	462.06	427.71	520.38	509.2	565.89	502.7	488.63	425.95	426.74	410.04	452.58	448.32	451.57	493.85	517.3	568.22	535.44	510.61	454.49	489.73
1427208_at	Zfp451	zinc finger protein 451	0.000141186	0.000654	11.02	382.52	77.89	291.96	355.92	315.84	334.38	343.02	424.78	437.27	428.53	428.49	407.36	319.06	296.16	360.59	351.31	418.19	388	413.58	447.16	438.02	447.75	400.15	377.04	353.97	317.92
1427250_at	Atp2a2	ATPase, Ca++ transporting, cardiac muscle, slow twitch 2	0.0130189	0.00409	19.36	6556.8	1345.6	6775.99	6664.17	6692.16	6636.1	6228.65	5993.16	6608.6	5437.45	5442.08	5747.74	6202.68	7759.48	8128.65	7648.72	7292.21	7274.38	6356.46	6273.47	6979.54	6505	6244.5	6167.68	6424.17	6643.48
1427261_at	Wwc1	WW, C2 and coiled-coil domain containing 1	3.01e-05	0.0131	0.98	746.44	197.45	800.4	853.25	791.96	833.78	747.3	765	833.63	627.36	611.66	596.48	623.37	938.69	840.96	826.28	864.27	926.89	745.58	653.39	647.37	546.27	577.81	543.8	653.34	725.24
1427344_s_at	Rasd2	RASD family, member 2	0.0110385	0.00177	5.9	406.25	183.2	390.45	304.11	366.29	421.01	420.57	457.29	450.79	445.02	482.63	404.05	384.33	203.58	303.84	158.01	155.74	346.65	431.76	522.14	474.2	458.42	424.34	356.95	306.91	408.45
1427364_a_at	Odc1	ornithine decarboxylase, structural 1	9.24e-05	0.00278	10.44	140.78	113.34	117.84	123.81	127.97	138.26	187.91	232.26	342.39	205.34	172.12	132.33	128.89	142.89	127.41	115.7	135.55	198.54	179.45	195.65	161.6	163.62	158.87	133.67	138.67	120.88
1427416_x_at	Dusp7	dual specificity phosphatase 7	0.0289209	0.00469	16.31	184.32	50.75	211.31	196.89	192.73	134.61	170.46	180.39	163.08	189.6	188.97	206.57	224.81	227.3	167.84	189.74	188.24	125.81	133.83	169.42	155.87	141.86	190.1	179.12	189.66	171.17
1427432_a_at	Sfrs10	splicing factor, arginine/serine-rich 10 (transformer 2 homolog, Drosophila)	0.028639	0.0131	18	8218.29	1242.59	8479.97	8949.17	8904	8476.36	8206.37	7923.82	7812.29	8230.22	8167.35	9348.1	10203.3	9991.8	8168.24	8032.31	8737.66	8010.49	7718.15	8173.7	7895.58	8771.45	8183	8030.56	9635.5	8731.49
1427464_s_at	Hspa5	heat shock protein 5	0.00122121	0.000741	14.37	10977.1	3833.77	12334.5	12149.8	10520.2	10847.8	10552.6	9915.56	11830.5	10839	11796	11443.5	12678.7	15926.6	15730.3	12075.1	11106.4	10706.2	10478.8	9667.43	8259.1	9251.73	10409.3	10164.1	12033.4	12221.2
1427504_s_at	Sfrs2	splicing factor, arginine/serine-rich 2 (SC-35)	0.0146037	0.0152	17.238	3559.34	595.93	3418.77	3563.85	3214.4	3213.66	3758.72	3475.01	3189.5	3322.54	3152.35	3483.27	3915.14	4344.21	4145.73	3730.83	3623.84	3568.68	3218.72	3207.51	3194.49	3554.82	3647.16	3701.37	3816.22	3829.44
1427624_s_at	Il22 /// Iltifb	interleukin 22 /// interleukin 10-related T cell-derived inducible factor beta	2.45e-09	0.000227	16	344.65	1038.9	857.07	797.65	351.99	338.65	166.94	80.26	100.34	57	98.62	266.72	601.56	1746.11	2101.13	1451.38	1582.84	639.42	350.65	61.67	23.33	37.13	61.03	136.51	359.09	530.86
1427702_at	Zfp1	zinc finger protein 1	0.0141416	0.00459	11.44	226.4	28.55	219.97	220.46	226.44	206.52	227.33	233.57	259.34	247.79	243.08	263.61	253.3	224.97	215.98	217.81	220.69	212.55	219.33	237.25	228.12	226.77	225.97	226.36	239.32	221.25
1427898_at	Rnf6	ring finger protein (C3H2C3 type) 6	0.0467346	0.000742	12.64	2235.39	578.7	2258.53	2215.53	2094.55	2164.64	2097.16	2037.78	2542.22	2165.47	2337.85	2255.26	2667.78	2671.66	3110.82	2550.2	2650.54	2368.71	2151.07	1953.42	2031.44	2071.45	2149.34	2164.73	2508.76	2406.43
1427901_at	Mrps18c	mitochondrial ribosomal protein S18C	0.0092879	0.00502	11.63	1647.12	319.57	1679.21	1543.96	1591.12	1626.01	1639.58	1717.99	1524.09	2028.93	1803.05	1760.87	1703.22	1495.55	1554.53	1393.91	1389.8	1482.24	1753.76	1641.32	1701.84	1652.93	1733.51	1745.68	1672.92	1630.12
1427906_at	1110037F02Rik	RIKEN cDNA 1110037F02 gene	0.00439252	0.013	21.37	326.61	67.39	346.55	376.85	361.84	381.27	313.89	256.84	326.78	286.9	320.14	278.29	337.92	391.62	326.44	343.67	358.38	352.9	323.81	271.23	299.66	320.09	275.49	266.69	333.66	332.62
1427936_at	Thnsl1	threonine synthase-like 1 (bacterial)	0.00965254	0.0235	19.76	339.64	95.53	405.35	424.49	390.76	367.93	331.57	304.29	311.22	336.45	317.74	334.57	381.86	379.53	359.2	308.64	363.85	393.46	342.83	354.29	233.43	286.67	306.88	317	320.97	345.29
1427955_a_at	Deb1	differentially expressed in B16F10 1	0.00137554	0.00204	8.88	1895.74	227.35	1926.36	1703.99	1805.45	1861.55	1931.9	2158.7	2098.48	2026.87	2080.36	1909.52	1863.78	1743.14	1711.19	1870.49	1737.11	1758.59	1992.62	1889.68	2094.6	1953.25	1851.92	1998.03	1731.66	1901.8
1427983_at	Zfp280c	zinc finger protein 280c	0.00190346	0.0198	10.7	499.42	98.25	418.19	421.93	417.38	477.75	469.12	517.48	613.88	510.15	520.98	535.33	456.51	508.6	502.88	504.52	457.98	472.39	495.96	536.04	539.02	592.31	531.87	488.55	473.84	483.21
1428023_at	3110009E18Rik	RIKEN cDNA 3110009E18 gene	0.0096984	0.00107	14.26	202.86	79.02	221.11	207.65	184.41	195.64	198.47	205.34	212.22	200.38	199.41	222.51	207.72	286.69	261.51	269.94	260.42	211.19	198.96	170.26	145.08	128.64	164.16	177.79	193.82	264.23
1428085_at	1110057K04Rik	RIKEN cDNA 1110057K04 gene	0.0121225	0.00539	21.24	594.07	74.82	631.21	630.75	652.77	663.41	585.26	565.47	591.8	568.04	621.44	596.34	653.23	652.72	626.11	622.63	572.72	559.68	573.15	560.17	513.78	584.47	573.43	623.18	581.57	627.98
1428112_at	Armet	arginine-rich, mutated in early stage tumors	0.000608534	0.000849	16.13	4025.48	1708.32	4824.75	4066.03	3496.79	3564.79	3608.71	3458.53	4330.25	3984.93	3710.78	3823.2	4466.91	4900.56	6111.27	5088.57	4238.8	4104.35	3809.07	3293.83	2694.64	3269.79	3971.09	4126.1	4716.13	4756.65
1428114_at	Slc14a1	solute carrier family 14 (urea transporter), member 1	0.00118032	0.000958	7.2	653.31	191.97	652.09	604.28	635.55	688.78	607.36	664.78	705.55	904.37	722.82	712.74	646.15	610.24	632.48	520.43	535.51	564.09	602.52	654.53	651.53	699.62	710.91	704.61	712.85	660.8
1428115_a_at	Rab2b	RAB2B, member RAS oncogene family	0.0221644	0.0166	16.33	628.87	117.6	669.54	668.29	670.79	676	609.11	581.34	621.34	607.13	648.26	624.6	649.5	799.62	729.99	622.33	798.07	646.63	615.6	566.88	595.66	569.2	564.41	675.18	585.68	633.15
1428124_at	Gtf2e1	general transcription factor II E, polypeptide 1 (alpha subunit)	0.0268069	0.0164	17.202	773.88	191.27	810.88	895.07	815.51	777.68	730.05	667.74	850.04	745.43	740.38	770.07	862.11	1050.28	743.79	914.17	948.26	779.86	741.72	709.34	732.41	751.49	739.89	737.52	788.95	850.95
1428157_at	Gng2	guanine nucleotide binding protein (G protein), gamma 2	0.0132285	0.000446	19.46	2079.41	454.33	2087.27	2265.08	2247.11	2175.44	1896.8	1718.44	1918.72	1651.72	1871.11	1734.71	1969.07	1934.13	2414.69	2560.37	2341.79	2481.61	2147.74	2138.02	2200.92	2150.6	2010.19	1998.02	1932.57	2071.56
1428165_at	Vps24	vacuolar protein sorting 24 (yeast)	0.0104294	0.0177	20.84	294.88	94.74	367.22	331.17	352.26	321.52	271.78	255.22	224.05	253.99	270.06	283.54	316.11	271.82	413.53	310.22	297.63	275.34	304.32	306.61	279.9	292.13	259.88	332.5	278.26	323.8
1428175_at	Tmem161b	transmembrane protein 161B	0.0114393	0.0144	8.5	276.97	68.31	251.64	261.84	266.67	289.63	294.59	282.57	271.18	289.88	366.11	294.66	276.79	255.35	229.5	243.85	263.61	277.15	259.09	310.3	258.75	315.35	310.78	307.54	288.26	246.65
1428180_at	2810422J05Rik	RIKEN cDNA 2810422J05 gene	0.0385258	0.00974	4.8	312.47	66.73	335.72	288.35	311.35	305.52	318.46	340.31	303.14	370.48	347.36	309.59	309.28	244.85	283.08	286.18	277.25	237.02	342.83	328.32	356.59	334.3	341.99	351.8	313.6	304.54
1428197_at	Tspan9	tetraspanin 9	0.00018848	0.000273	4.7	280.38	101.99	235.97	282.48	342.6	313.87	398.08	353.47	276.8	339.73	275.48	229.54	217.45	194.1	233.94	245.95	234.56	265.64	315.1	362.68	350.12	335.76	299.88	290.35	222.9	278.28
1428198_at	Adal	adenosine deaminase-like	7.72e-05	0.00121	17.728	159.56	89.08	211.83	176.2	179.28	183.34	143.62	126.8	151.9	121.22	117.56	131.02	178.44	263.01	295.72	215.84	191.14	170.31	163.11	156.01	138.48	136.02	121.03	135.42	131.48	185.07
1428223_at	Mfsd2	major facilitator superfamily domain containing 2	0.000104283	0.00205	19.15	337.59	140.14	440.35	415.68	371.72	335.61	249.67	328.52	256.09	336.21	309.88	396.4	427.82	350.09	356.42	323.21	340.34	279.28	294.69	296.35	299.75	286.29	338.96	387.02	529.95	476.41
1428224_at	Hnrpdl	heterogeneous nuclear ribonucleoprotein D-like	0.00420391	0.0101	11.04	900.76	370.81	592.41	739.73	810.8	766.46	894.43	907.08	937.14	1051.11	1334.03	1093.67	925.47	668.63	753.14	778.18	987.58	755.26	831.1	1141.38	787.55	1054.99	1029.55	994.8	928.97	706.03
1428232_at	Cpsf6	cleavage and polyadenylation specific factor 6	1.13e-05	0.000979	19.78	618.16	132.94	661.41	693.98	657.67	675.11	638.02	567.6	551.8	521.95	537.03	521.08	748.86	772.58	697.16	652.1	682.49	696.08	582.52	584.34	517.32	516.88	521.12	506.71	598.3	663.39
1428233_at	Cpsf6	cleavage and polyadenylation specific factor 6	0.00124299	0.023	22.52	1077.88	388.5	1287.85	1271.23	1300.27	1530.55	1113.37	967.44	1024.23	783.95	1067.39	879.76	1320.76	1560.95	1016.98	1185.05	1144.54	1192.56	962.73	934.04	812.57	860.08	840.71	790.33	1088.37	1236.59
1428237_at	Akirin2 /// LOC100046298	akirin 2 /// hypothetical protein LOC100046298	0.00802553	0.0034	15.52	3855.08	600.77	4197.64	3918.64	3757.64	3909.81	3792.28	3707.84	3855.46	3618.38	3815.5	3891.1	4121.81	4530.78	4047.24	3908.73	3928.46	3957.01	3810.84	3451.42	3329.24	3665.37	3610.69	3449.72	3953.19	3854.7
1428262_s_at	Hnrnpa3 /// LOC100045099 /// OTTMUSG00000004599	heterogeneous nuclear ribonucleoprotein A3 /// similar to heterogeneous nuclear ribonucleoprotein A3 /// predicted gene, OTTMUSG00000004599	0.012579	0.0119	18.259	8001.8	1381.6	8016.18	8808.63	8488.35	7729.01	8081.02	7643.52	8104	7858.06	7626.17	7870.57	8223.47	9378.22	8813.78	8552.6	8930.2	8170.32	7987.42	7816.41	6615.01	7920.09	7765.07	8341.95	7969.9	7968.78
1428277_at	Otud6b	OTU domain containing 6B	0.0102208	0.00252	14.86	1713.02	196.71	1774.99	1775.34	1690.26	1757.31	1629.7	1627.73	1711.07	1664.52	1728.8	1714.97	1727.4	1893.71	1780.21	1764.6	1766.3	1730.21	1606.86	1574.16	1586.72	1588.45	1554	1500.29	1631.13	1758.5
1428281_at	Trub1	TruB pseudouridine (psi) synthase homolog 1 (E. coli)	0.000251059	0.0013	19.87	329.1	93.7	386.44	318.3	345.58	291.11	270.02	272.74	262.86	266.32	290.27	335.93	372.76	322.27	450.25	385.28	369.99	308.15	301.32	291.28	314.23	340.89	336.81	396.27	367.79	392.53
1428288_at	2310051E17Rik /// Klf9	RIKEN cDNA 2310051E17 gene /// Kruppel-like factor 9	0.00442536	0.00227	9.55	4450.47	1050.37	4140.44	4453.6	4206.07	4246.53	3854.94	4831.39	5522.95	4781.89	4931.18	5482.53	4684.29	4447.35	3442.26	4002.18	4053.3	4163.8	3908.75	3997.57	4758.77	4463.6	4719.88	5543	4811.16	4100.15
1428289_at	2310051E17Rik /// Klf9	RIKEN cDNA 2310051E17 gene /// Kruppel-like factor 9	2.5e-05	0.000998	9.97	3649.01	971.55	3448.21	3589.68	3400.96	3300.61	3322.7	4279.11	4532.03	4102.69	4193.71	4676.14	3810.92	3505.96	3173.91	3323.34	3280.47	3052.25	3568.63	3389.01	4514.36	3886.34	4237.19	4995.34	4045.87	3708.34
1428308_at	Pdrg1	p53 and DNA damage regulated 1	0.0026031	0.00017	15.46	409.19	134.83	513.5	416.1	412.67	347.23	372.55	386.94	382.34	414.84	383.96	456.49	438.19	550.44	501.78	605.94	563.28	352.23	405.7	336.28	344.31	343.39	344.35	357.21	440.86	430.65
1428309_s_at	Pdrg1	p53 and DNA damage regulated 1	0.00108125	0.000392	14.86	804.51	265.96	916.23	805.44	814.45	735.76	721.5	733.23	803.58	838.52	749.51	824.17	879.02	1199.92	1179.51	1154.85	1088.48	742.35	770.25	698.21	668	708.08	759.16	759.89	913.55	888.9
1428321_at	Eml1 /// LOC634102	echinoderm microtubule associated protein like 1 /// similar to echinoderm microtubule associated protein like 1	0.00369519	0.0188	20.29	114.4	26.55	153.43	113.94	139.67	127.28	113.33	111.68	105.06	102.96	116.24	101.06	107.53	120.04	150.13	140.22	128.91	124.49	100.48	114.87	100.32	112.36	115.28	102.9	105.16	115.26
1428325_at	Cnpy4	canopy 4 homolog (zebrafish)	0.0473788	0.0134	15.16	456.67	95.42	490.8	473.59	461.19	433.64	429.7	448.83	515.79	484.32	413.58	410.81	474.86	586.72	581.93	488.45	523.17	504.95	452.16	395.87	398.95	404.83	414.54	447.14	445.34	502.85
1428329_a_at	Ift80	intraflagellar transport 80 homolog (Chlamydomonas)	0.010439	0.0124	19.34	200.71	75.43	260.68	258.81	196.96	224.34	218.53	188.6	274.14	166.87	178.44	172.81	198.79	236.17	301.85	263.68	317.72	260.97	189.84	188.44	185.44	196.98	182.66	200.82	205.03	200.61
1428354_at	Foxk2	forkhead box K2	0.0487743	0.0108	18	174.14	66.84	247.93	176.48	180.59	176.53	172.49	114.26	151.33	151.1	160.48	179.45	195.66	197.54	201.42	201.68	159.12	182.13	175.78	162.21	183.38	161.23	170.27	169.35	165.4	170.78
1428373_at	Ip6k2	inositol hexaphosphate kinase 2	0.00582723	0.0149	14.4	905.5	291.75	918.56	820.55	812.23	738.9	867.38	853.91	922.47	1167.21	1007.51	1033	1288.31	892.44	826.46	752.18	704.81	979.47	992.97	867.99	849.94	961.63	981.36	1091.48	944.15	885.69
1428388_at	Tnks2	tankyrase, TRF1-interacting ankyrin-related ADP-ribose polymerase 2	0.00240385	0.00207	20.3	2132.48	255.72	2348.57	2343.55	2248.8	2280.22	1877.85	1861.52	1852.01	1906.2	1952.22	1992.27	2065.06	2242.76	2178.73	2363.45	2251.35	2172.56	2062.7	1998.42	2298.83	2133.18	2002.26	1988.89	2131.77	2195.74
1428445_at	Yif1b	Yip1 interacting factor homolog B (S. cerevisiae)	0.0130591	0.00539	4.3	406.56	130.3	450.2	344.69	400.57	370.38	412.55	478.34	350.44	503.86	490.56	438.78	384.56	244.94	276.38	303.51	263.11	293.11	427.31	439.53	477.45	429.73	449.71	505.54	382.34	384.48
1428487_s_at	Coq10b	coenzyme Q10 homolog B (S. cerevisiae)	0.00134123	0.00346	7.9	1033.93	735.76	748.7	693.97	781.52	1228.33	1436.51	1613.93	2165.49	1380.24	1027.24	940.24	1107.77	1000.38	860.23	732.75	829.76	1119.87	1135.94	1132.85	972.38	1194.87	1040.63	854.06	1042.49	761.67
1428515_at	Zswim7	zinc finger, SWIM-type containing 7	0.00630912	0.00146	5.7	232.82	97.88	238.94	199.08	184.13	195.36	218.31	273.64	222.19	315.83	277.91	254.01	232.94	122.47	179.53	125.36	120.07	145.63	235.64	215.34	261.72	232.7	233.71	265.57	241.59	243.37
1428519_at	2610528E23Rik	RIKEN cDNA 2610528E23 gene	0.010542	0.000605	14.5	380.42	165.62	423.85	358.44	371.82	392.29	323.08	320.33	397.11	373.87	380.21	380.62	405.73	539.53	583.37	489.27	464.28	432.15	389.96	316.07	252.14	351.52	317.94	327.2	368.3	402.83
1428524_at	Cars2	cysteinyl-tRNA synthetase 2 (mitochondrial)(putative)	0.00225336	0.000764	16.84	106.4	56.78	144.34	119.98	91.82	133.45	107.64	97.88	72.21	94.29	95.7	85.9	109.87	145.87	170.88	185.76	126.78	132.3	120.12	99.02	100.34	106.12	91.22	85.92	101.03	106.69
1428525_at	4930488B01Rik	RIKEN cDNA 4930488B01 gene	3.3e-05	0.0014	21.67	4760.34	853.69	5255.94	5002.63	4957.35	4960.24	4736.77	4404.21	5171.83	4136.96	4124.91	4198.58	4323.25	5129.3	4900.59	5299.34	5502.29	5715.9	4932.65	4764.06	4262.31	4587.65	4081.83	4008.52	4178.32	4756.62
1428527_at	Snx7	sorting nexin 7	0.00558991	0.00424	16.34	284.77	74.88	325.31	344.25	306.85	327.12	251.53	277.6	281	280.4	281.51	302.9	351.45	401.29	307.97	333.76	332.82	316.34	282.2	262.46	267.7	272.6	263.82	275.42	271.95	287.35
1428542_at	Eif1ad	eukaryotic translation initiation factor 1A domain containing	2.66e-05	0.000616	8.33	396.63	106.41	340.84	351.05	389.35	382.45	392.49	476.34	408.49	452.24	498.49	472.45	400.76	292.07	312.33	304.9	351.68	285.67	408.3	474.77	465.24	475.68	443.09	483.84	373.14	366.66
1428544_at	0610007L01Rik	RIKEN cDNA 0610007L01 gene	9.45e-05	0.000452	11.33	390.89	151.11	406.94	393.91	357.31	326.8	372.14	446.73	595.08	511.57	516.51	446.82	366.12	306.87	304.33	292.86	374.55	349.82	387.86	437.05	451.64	446.6	466.6	488.15	347.78	371.62
1428552_at	2610001J05Rik	RIKEN cDNA 2610001J05 gene	0.00252177	0.01	19.03	1880.81	442.4	2097.12	1939.75	1964.11	2066.03	1860.83	1911.63	1970.32	1709.29	1769.48	1769.68	1860.6	2194.94	2264.33	2201.56	2377.41	1915.6	1661.94	1670.69	1492.61	1763.4	1582.41	1900.78	1706.72	1857.7
1428557_a_at	Osgepl1	O-sialoglycoprotein endopeptidase-like 1	0.0177759	0.00174	10.5	470.65	113.64	470.21	435.11	464.9	438.66	515.5	512.61	572.01	548.62	592.46	601.19	506.84	390.26	448.37	373.9	458.45	381.21	474.09	517.01	471.09	446.94	494.67	558.44	445.81	429.36
1428558_at	Osgepl1	O-sialoglycoprotein endopeptidase-like 1	0.0499434	0.012	8.6	154.14	31.52	158.84	143.83	120.58	154.54	154.42	158.09	178.91	170	163.79	153.85	156.2	117.79	144.9	159.78	138.16	123.78	145.6	150.57	152.4	160.32	169.05	180.82	151.82	136.8
1428562_at	2210403K04Rik	RIKEN cDNA 2210403K04 gene	2.55e-06	0.000415	9.23	478.56	215.8	383.12	374.08	390.2	482.51	492.96	595.44	782.87	612.93	613.22	565.46	443.12	396.2	351.27	388.54	474.62	470.65	566.39	568.69	440.24	734.13	574.4	583.04	424.76	379.97
1428572_at	Basp1 /// LOC100045716	brain abundant, membrane attached signal protein 1 /// similar to 22 kDa neuronal tissue-enriched acidic protein	0.00127064	0.00314	20.03	22424.3	3358.53	23116.1	23078.5	22924.7	22552.4	21968.5	22106.3	20367.9	20384.6	20543.3	21054.3	22195	24743	27085	24279.4	22377.3	22471.3	22670.9	21719.2	22908.4	21480	21242	20893.6	22505.9	23575.2
1428585_at	Actn1	actinin, alpha 1	0.0129624	0.000644	14.83	555.78	203.33	596.78	541.48	484.04	478.01	498.23	471.71	566.9	489.01	537.32	537.45	651.47	870.65	878.37	745.09	749.19	681.26	551.38	482.99	531.48	493.21	560.18	573.21	706.49	613.66
1428588_a_at	Mrpl41	mitochondrial ribosomal protein L41	0.00125368	0.000286	15.96	9280.22	3784.18	10525.6	10650.8	9265.68	8888.17	8469.07	8985.24	10009.4	7934.42	7746.53	8728.14	9718.28	14936	13175.1	13986.8	15314.9	12252.1	10040.8	8149.71	8376.6	8018.89	7777.46	8022.67	9294.77	10047.2
1428589_at	Mrpl41	mitochondrial ribosomal protein L41	0.0020123	0.000523	15.34	3493.71	1521.6	4320.68	3794.59	3227.85	3453.65	3325.85	3533.77	3833.88	3080.86	2945.97	3308.94	3614.25	5306.7	5897.76	5831.77	5441.52	4584.42	3966.72	2919.8	2949.41	2975.25	2854.55	3121.74	3385.99	3786.77
1428602_at	Kcnj9	potassium inwardly-rectifying channel, subfamily J, member 9	0.0154262	0.00138	14.78	142	49.77	153.99	141.6	143.64	128.36	114.54	140.05	155.64	128.77	135.29	134.72	145.88	160.44	210.58	195.49	162.23	162.46	142.4	125.32	122.16	111.04	136.58	126.89	144.44	154.71
1428619_at	2310005N03Rik	RIKEN cDNA 2310005N03 gene	0.000225393	0.00224	18.792	2517.83	543.31	2733.1	2559.47	2527.03	2395.72	2523.23	2636	2335.43	2347.53	2209.39	2354.11	2434.43	2787.54	3202.64	2810.53	2869.41	2696.61	2655.79	2266.09	2203.17	2116.01	2383.01	2333.32	2512.44	2639.1
1428658_at	EG628161 /// Pin4	predicted gene, EG628161 /// protein (peptidyl-prolyl cis/trans isomerase) NIMA-interacting, 4 (parvulin)	0.0301828	0.00424	13.73	1546.44	207.64	1649.66	1507.7	1519.97	1323.58	1588.81	1612.06	1450.29	1641.44	1541.85	1641.26	1593.71	1551.02	1619.68	1349.48	1350.35	1290.73	1522.57	1336.02	1395.25	1439.5	1601.93	1656.76	1706.02	1651.84
1428662_a_at	Hopx	HOP homeobox	0.00105164	0.000323	7.5	281.07	167.51	251.45	196.04	216.65	247.97	284.18	338.79	313.35	320.26	316.73	342.72	239.26	189.57	147.18	129.05	86.65	225.19	256.5	277.97	288.05	301.9	421.67	367.78	330.7	307.97
1428674_at	Prpf38b	PRP38 pre-mRNA processing factor 38 (yeast) domain containing B	0.00878414	0.00277	18.258	596.9	175.52	632.2	605.47	551.72	580.41	497.95	535.29	617.09	495.66	530.62	551.75	696.33	725.22	763.08	844.47	717.99	718.23	589.72	516.27	569.57	604.08	583.99	573.28	846.71	730.49
1428683_at	Fam173b	family with sequence similarity 173, member B	2.27e-05	0.000601	18.765	136.3	70.8	175.39	134.6	155.91	142.21	120.45	122.47	116.36	103.58	115.24	116.14	150.7	216.22	223.9	203.76	132.78	157.83	141.8	128.83	99.79	82.31	122.54	137.99	165.65	169.16
1428705_at	1700007K13Rik	RIKEN cDNA 1700007K13 gene	0.000558478	0.00159	19.03	874.9	394.96	1127.81	972.66	797.97	838.75	883.32	752.02	1030.17	687.23	657.45	722.32	866.49	1359.74	1193.36	1140.19	1099.67	1187.53	1026.06	652.42	569.83	606.01	702.67	744.41	998.63	1182.33
1428706_at	Cenpv	centromere protein V	0.00211583	0.00336	17.464	988.59	221.08	1080	973.09	933.36	1005.32	988.3	1004.94	951.67	908.27	915.01	967.25	994.62	1116.39	1177.06	1194.03	1008.59	988.88	1074.73	922.83	824.58	751.87	872.33	954	1018.19	1055.33
1428710_at	Rit1	Ras-like without CAAX 1	0.000131166	0.000718	16.93	202.09	76.33	261.72	215.99	204.87	205.67	175.29	193.58	163.78	190.29	184.05	199.32	224.39	303.66	228.58	234.66	238.25	214.47	180.3	151.01	162.19	191.29	162.32	157.08	206.22	229.98
1428725_at	Pias2	protein inhibitor of activated STAT 2	0.00622341	0.011	18.522	1034.9	249.17	1020.35	1107.17	1108.42	1160.16	972.61	899.65	1049.46	898.96	968.5	1005.12	1114.07	1389.69	1098.85	1162.23	1214.53	1098.7	915.69	978.37	973.25	1001.01	925.02	891.36	1061.9	1093.66
1428728_at	Ddx51	DEAD (Asp-Glu-Ala-Asp) box polypeptide 51	0.0267593	0.00481	22.73	193.67	29.13	200.38	193.47	209.61	196.33	181.3	193.86	174.34	181.61	188.76	172.53	201.56	188.03	230.8	219.04	199.6	208.15	193.13	180.45	185.89	183.37	208.36	186.06	212.41	209.31
1428755_at	Creb1	cAMP responsive element binding protein 1	0.0221313	0.025	18.508	971.03	304.03	1136.2	1004.73	1044.62	1062.55	973.45	867.58	1017.04	836.48	890.56	968.61	1085.99	1235.12	926.27	1019.61	1125.9	1048.86	820.2	890.91	627.07	885.86	873.63	798.03	1048.97	949.63
1428758_at	Tmem86a	transmembrane protein 86A	0.0382004	0.0153	7.9	203.18	63.6	188.26	184.5	183.84	209.01	221.03	262.43	271.81	258.78	199.48	177.32	174.54	197.34	202.94	190.6	195.5	227.28	211.15	214.63	215.77	208.04	203.43	262.41	144.61	186.32
1428760_at	Snapc3	small nuclear RNA activating complex, polypeptide 3	5.67e-06	0.000169	19.94	356.5	119.53	443.12	395.53	395.96	367.46	296.89	284.73	273.56	305.57	278.88	293.2	437.17	499.13	485.61	414.68	399.38	415.31	343.73	260.08	345.55	336.55	301.71	331.66	471.02	453.42
1428795_at	1110021L09Rik	RIKEN cDNA 1110021L09 gene	0.0100311	0.0418	19.06	545.7	134.83	582.94	586.81	550.78	623.96	529.44	564.95	548.62	517.59	487.02	454.87	548.6	692.45	684.1	585.92	569.98	541.49	559.9	536.97	535.1	422.79	445.65	515.39	473.23	542.81
1428824_at	2310003C23Rik	RIKEN cDNA 2310003C23 gene	0.00794303	0.00365	16.65	706.1	126.27	765.97	730.2	702.31	695.86	637.75	698.48	711.38	662.56	683.85	642.11	777.83	890.29	752.97	730.03	712.64	771.97	702.44	659.76	652.44	641.78	666.86	709.76	725.01	744.46
1428834_at	Dusp4	dual specificity phosphatase 4	7.97e-10	0.00157	8.42	197.31	818.92	82.82	82.41	113.24	553.47	752.19	753.34	1690.3	589.04	271.55	121.77	64.17	84.45	106.01	80.45	109.8	714.28	607.3	559.21	435.1	562.97	343.32	123.07	70.76	52.46
1428871_at	LOC100047441 /// Msl1	similar to RIKEN cDNA 4121402D02 gene /// male-specific lethal 1 homolog (Drosophila)	0.000539075	0.000538	21.77	2646.96	572.22	2698.94	2648.47	2788.83	2766.7	2439.6	2340.5	2536.17	2158.35	2124.1	2274.35	2453.58	2714.19	3268.54	3150.23	2911.27	2988.49	2694.62	2350.92	2694.71	2645.45	2248.5	2139.23	2606.65	2744.99
1428884_at	Tmem57	transmembrane protein 57	0.0383321	0.0252	14.46	1141.79	333.53	1148.62	1031.41	1094.52	1116.94	1043.56	1093.01	1180.27	1148.79	1166.91	1272.9	1078.23	935.65	755.41	931.52	859.14	1206.93	1159.13	1146.8	1422.48	1253.22	1147.84	1131.73	1196.69	1136.78
1428886_at	Rbbp5	retinoblastoma binding protein 5	0.0435281	0.00284	19.1	870.5	155.87	1018.67	871.16	927.33	864.47	761.56	723.18	749	706.93	732.4	837.23	881.05	950.1	891.82	937.31	870.94	953.06	870.06	836.51	958.54	862.39	858.15	822.08	877.56	881.73
1428889_at	Alkbh3	alkB, alkylation repair homolog 3 (E. coli)	0.0248012	0.0452	12.09	165.78	52.52	151.86	134.17	137.73	156.56	131.05	182.99	188.48	175.69	167.29	164.95	150.56	160.29	166.61	181.75	161.91	143.69	197.47	197.39	236.08	215.75	203.99	203.97	147.39	149.74
1428892_at	LOC100047806 /// Ppil1	similar to peptidylprolyl isomerase-like 1 /// peptidylprolyl isomerase (cyclophilin)-like 1	0.000285628	0.00122	18.244	271.72	45.13	310.16	275.9	277.1	240.38	237.04	227.09	228.96	287.46	244.14	272.88	280.88	288.08	307.03	293.01	276.8	219.9	253.91	266.78	251.89	252.44	250.64	270.57	305.88	299.27
1428910_at	2310022B05Rik	RIKEN cDNA 2310022B05 gene	3.13e-05	0.000622	7.5	3313.7	892.47	2679.27	3067.03	2972.8	3397.01	3158.09	3500.61	3473.47	4158.19	3456.13	3432.25	2859.07	2373.24	2832.92	3032.11	3082.14	3253.72	3384.05	3551.64	3696.12	3704.48	3655.76	3373.68	3112.85	3084.28
1428922_at	1200009O22Rik	RIKEN cDNA 1200009O22 gene	5.76e-05	0.000815	4.7	826.42	186.85	809.06	905.7	884.67	931	901.32	980.66	815.83	1039.7	822.7	769.99	677.95	714.75	735.53	790.79	814.7	830.14	990.57	1051.66	1039.02	906.93	863.83	785.46	763.28	752.39
1428930_at	Tmem29	transmembrane protein 29	0.000132464	0.00112	9.72	2162.32	453.07	2012.25	1890.38	2004.75	2098.75	2085.83	2244.54	2509.5	2275.62	2261.38	2257.04	2097.7	1862.66	1603.36	1882.18	1964.59	2370.08	2271.93	2353.51	2254.01	2294.86	2271.45	2158.52	2166.12	2125.03
1428942_at	Mt2	metallothionein 2	4.05e-05	0.000195	4.9	5802.08	2375.25	4207.69	4621.06	5127.63	5459.27	5920.84	6729.7	6337.77	7791.91	6550.29	6394.25	4367.15	3041.42	3479.84	3553.76	4363.38	4402.12	6457.97	6468.07	5683.31	6503	6621.21	7011.47	5969.56	5095.86
1428945_at	Uba6	ubiquitin-like modifier activating enzyme 6	0.00388113	0.00622	22.11	454.57	156.73	442.2	523.08	458	559.39	476.2	396.66	498.71	331.09	402.22	403.76	461.12	644.55	561.48	574.78	561.51	565.87	429.52	446.08	413.66	446.38	412.23	398.43	451.14	472.68
1428948_at	5730414M22Rik	RIKEN cDNA 5730414M22 gene	0.00107736	0.0021	15.38	118.22	103.77	137.02	137.75	115.79	116.24	119.42	114.62	146.57	76.66	68.12	87.59	140.69	275.67	251.77	231.07	199.66	148.24	117.76	75.82	77.52	86.45	75.88	70.95	118.68	126.74
1428997_at	Phf23	PHD finger protein 23	0.00919232	0.00353	16.96	908.38	156.04	1049.15	882.79	902.52	881.99	878.34	910.82	920.98	879.57	867.72	880.96	1031.35	1053.27	1105.92	1021.16	879.91	905.95	963.98	793.84	922.44	855.59	824.79	926.87	1041.72	1029.79
1429021_at	Epha4	Eph receptor A4	0.0347518	0.0242	16.09	959.7	402.32	1127.29	998.96	1120.71	1113.82	1054.94	871.04	886.25	945.32	1054.99	912.56	1084.51	1397.33	1469.5	1115.65	1124.34	808.94	815.48	974.08	664.85	860.26	877.32	867.56	900.54	899.69
1429038_at	Dda1	DET1 and DDB1 associated 1	0.048937	0.0177	13.71	921.83	306.52	973.62	844.6	840.52	782.45	992.96	879.96	726.97	1030.56	1137.91	1072.85	1068.89	662.87	524.87	705.81	650.92	774.86	871	1008.35	941.9	906.36	1075.14	1082.31	1041.68	937.3
1429053_at	1110012J17Rik	RIKEN cDNA 1110012J17 gene	4.11e-08	8.87e-05	8.26	911.23	552.99	815.44	711	693.7	1046.63	1297.64	1493.9	1689.75	1140.09	986.73	874.23	691.16	584.45	583.76	655.77	675.48	1070.35	1162.5	1200.78	1162.49	981.13	948.24	735.44	711.69	723.33
1429084_at	Vezf1	vascular endothelial zinc finger 1	0.0110683	0.00664	21.07	495.73	129.44	473.01	535.88	554.87	552.59	512.48	374.42	570.11	441.27	444.48	427.89	486.87	575.27	589.31	633.31	606.91	529.53	496.02	493.79	443.03	502.78	433.16	431.3	453.85	495.44
1429097_at	C030044C12Rik	RIKEN cDNA C030044C12 gene	0.000321766	0.000815	18.287	354.93	165.72	437.2	399.29	406.96	415.02	346.2	280.47	363.66	262.09	294.13	280.3	298.8	452.45	593.54	477.74	501.67	484.37	395.3	335.65	392.73	322.49	303.75	301.76	331.3	345.57
1429105_at	Dlgap1	discs, large (Drosophila) homolog-associated protein 1	0.00520845	0.00167	7	318.3	75.23	307.19	324.14	319.32	329.78	394.31	394.08	347.5	385.43	354.97	317.27	314.57	272.2	243.84	248.79	267.76	288.46	330.35	345.39	315.58	355.02	313.33	298.8	302.45	322.15
1429116_at	Slc17a5	solute carrier family 17 (anion/sugar transporter), member 5	0.00487345	0.00326	8.99	354.07	75.63	338.38	333.93	327.68	391.25	341.77	399.17	461.38	438.16	417.95	356.31	321.16	341.83	333.5	342.3	350.78	378.43	368.04	358.91	381.02	351.82	408.02	391.11	310.11	336.37
1429129_at	Lrrcc1	leucine rich repeat and coiled-coil domain containing 1	0.0114563	0.00978	14.34	476.44	174.51	430.13	475.33	477.54	400.68	473.88	481.21	431.58	507.72	570.25	598.76	514.49	357.88	256.01	388.35	422.91	377.26	490.43	540.16	550.13	605.03	547.61	564.94	471.71	449.02
1429138_at	Npas3	neuronal PAS domain protein 3	0.00757166	0.00721	6.2	806.08	240.72	567.53	981.69	867.39	821.8	890.38	968.67	883.89	930.78	880.9	843.54	717.59	606.57	500.25	717.3	852.73	701.44	790.36	906.16	851.71	762.35	781.87	695.85	606.65	621.88
1429144_at	Prei4	preimplantation protein 4	0.0188254	0.0232	5.8	763.53	155.64	762.47	670.3	702.28	729.57	762.66	844.09	918.02	719.12	737.76	764.39	726.23	689.71	733.4	801.2	715.23	841.34	878.36	861.1	981.58	918.69	828.01	867.78	829.78	696.34
1429167_at	Ccdc112	coiled-coil domain containing 112	0.00387735	0.00161	15.69	477.71	182.92	496.18	501.2	510.3	479.19	392.43	347.75	450.36	422.94	438.45	479.86	481.19	713.59	544.73	550.02	690.12	492.04	476.23	401.21	423.75	420.84	421.5	392.36	453.95	494.46
1429170_a_at	Mtf1	metal response element binding transcription factor 1	0.0178364	0.00508	15	110.55	40.18	108.72	111.35	97.1	92.05	95.01	105.79	104.99	139.75	124.68	122.94	142.58	79.15	75.52	92.27	62.23	110.02	113.78	109.6	115.98	118.97	139.34	112.86	111.07	111.28
1429185_at	4631416L12Rik	RIKEN cDNA 4631416L12 gene	0.0118736	0.00874	13.46	653.53	170.08	660.57	659.13	577.29	647.94	603.08	639.71	608.11	792.13	667.18	713.36	668.31	604.43	451.98	527.62	509.4	571.72	583.14	637.9	738.38	768.14	689.05	692.89	708.44	704.62
1429216_at	Paqr3	progestin and adipoQ receptor family member III	0.000178707	0.000472	8.8	315.35	154.97	196.94	242.91	261.19	320.14	355.48	365.34	469.63	353.8	434.14	376.34	319.36	268.16	159.7	161.43	297.75	311.35	278.96	355.21	277.2	411.63	320.64	320.56	262.91	229.15
1429217_at	Zfp655	zinc finger protein 655	0.000221223	0.000412	12.43	113.36	57.25	124.27	96.07	111.38	99.63	101.64	137.78	125.06	192.64	182.41	151.73	120.83	110.09	90.64	81.46	78.13	85.15	115.34	124.66	103.68	129.43	142.17	143.06	102.22	103.68
1429251_at	Prdm2	PR domain containing 2, with ZNF domain	0.035159	0.0191	12.03	582.03	144.57	440.86	539.97	458.73	613.12	458.08	517.2	688.37	618.68	626.24	609.46	562.46	598.77	399.22	497.27	591.45	584.99	559.03	604.09	635.64	625.55	595.24	579.07	576.52	458.09
1429259_a_at	1190007I07Rik /// 1810014B01Rik	RIKEN cDNA 1190007I07 gene /// RIKEN cDNA 1810014B01 gene	0.0411486	0.018	11.62	555.52	63.77	575.76	545.39	560.91	514.77	503.24	605.1	544.57	602.4	630.78	605.58	558.88	552.16	517.82	548.78	544.82	536.88	531.75	544.79	574.34	529.48	585.96	608.86	564.46	605.34
1429273_at	Bmper	BMP-binding endothelial regulator	0.022689	0.0236	17.187	394.84	185.55	401.6	437.3	469.22	435.81	365.35	326.91	416.58	370.4	375	361.7	428.34	645.86	461.8	525	654.91	382.21	283.8	369	347.86	357.94	325.81	388.08	403.15	401.96
1429286_at	1190003M12Rik	RIKEN cDNA 1190003M12 gene	1.02e-05	0.000666	18	106.19	97.96	161.21	166.49	143.37	74.51	117.72	76.53	56.78	104.59	102.97	130.64	162.63	173.95	204.68	252.71	107.79	88.67	87.92	58.21	81.2	65.57	96.45	138.51	101.09	142.95
1429321_at	Rnf149	ring finger protein 149	0.000288487	0.000589	10.87	1230.34	231.47	1216.27	1120.03	1162.16	1244.41	1213.58	1293.9	1371.65	1328.68	1375.94	1315.9	1215.19	1123.13	913	1142.88	1117.17	1059.67	1309.89	1301.26	1251.05	1317.23	1270.17	1246.54	1168.26	1063.28
1429335_at	Snapc1	small nuclear RNA activating complex, polypeptide 1	0.019553	0.0173	20.61	830.89	138.11	936.32	877.09	875.64	902.75	813.44	754.01	779.13	707.53	760.71	833.33	962.66	966.39	766.7	828.44	852.53	910.38	784.08	819.72	836.29	774.32	754.32	809.41	867.14	983.75
1429370_a_at	Psmd11	proteasome (prosome, macropain) 26S subunit, non-ATPase, 11	0.00673312	0.00506	14.43	1022.5	150.93	1084	1038.79	942.58	1003.21	1002.5	958.19	1027.47	1090.22	1107.02	1066.46	1104.48	955.82	1081.11	861.89	911.83	953	958.9	948.56	1049.98	1007.72	1017.54	1163.75	1114.18	1078.71
1429390_at	Acpl2	acid phosphatase-like 2	0.0492541	0.00103	17.121	481.42	193.27	595.98	472.31	533.78	509.35	405.96	341.07	477.72	438.45	428.8	454.82	456.75	567.57	684.52	637.43	652.21	727.61	509.36	440.24	471.95	485.11	528.37	475.12	462.78	500.61
1429393_at	Wdr40a	WD repeat domain 40A	0.0417278	0.0328	16.7	104.66	56.01	122.25	131.26	123.67	102.38	100.81	103.92	112.78	100.88	104.57	113.35	134.23	107.42	178.16	110.22	108.37	101.93	81.25	92.59	66.14	96.51	100.52	88.97	108.82	104.74
1429410_at	Eny2	enhancer of yellow 2 homolog (Drosophila)	5.57e-06	0.000263	9.87	822.59	161.29	747.94	753.57	709.65	709.13	844.87	912.8	846.57	919.52	908.1	937.57	827.28	673.44	650.34	614.99	785.59	744.31	870.13	817.9	865.09	918.67	931.63	920.86	774.06	742.74
1429418_at	Cdc14b	CDC14 cell division cycle 14 homolog B (S. cerevisiae)	0.00034956	0.000738	7.8	455.34	92.25	389.17	455.77	412.85	489.79	458	464.09	570.19	523.19	512.57	499.31	451.32	396.13	396.11	385.68	413.52	494.41	438.64	471.72	445.25	527.52	507.33	450.98	454.91	418.56
1429451_at	2610301B20Rik	RIKEN cDNA 2610301B20 gene	0.00786307	0.00255	16.57	1600.76	261.06	1588.04	1633.91	1641.84	1449.41	1594.75	1606.77	1654.03	1469.02	1423.51	1471.36	1623.02	1835.77	1915.15	1803.03	1834.08	1782.92	1624.14	1430.63	1440.31	1470.96	1524.84	1393.02	1510.32	1687.59
1429473_at	1200003I07Rik	RIKEN cDNA 1200003I07 gene	0.00619796	0.00635	6.8	594.73	117.74	557.24	595.89	583.24	680.79	663.7	583.17	695.99	623.17	703.77	613.85	551.08	468.28	525.24	610.26	584.64	595.88	593.57	671.52	579.77	672.55	606.54	559.56	544.51	486
1429497_s_at	Snx6	sorting nexin 6	1.28e-06	0.000308	20.17	589.06	147.56	693.43	617.11	610.84	643.38	543.17	502.41	511.76	512.77	552.15	549.47	600.08	648.82	735.05	613.65	666.84	592.81	532.56	548.3	439.94	559.79	528.22	585.3	605.81	621.35
1429506_at	Nkd1	naked cuticle 1 homolog (Drosophila)	0.011375	0.0454	2.57	102.08	124.99	94.64	125.73	104.7	117.99	155.24	131.81	196.32	60.82	63	35.19	98.76	285.17	203.29	191.05	269.34	164	116.49	95.06	75.74	59.47	60.25	67.36	88.86	99.47
1429519_at	Fpgt	fucose-1-phosphate guanylyltransferase	0.000472716	0.0088	20.09	1205.08	255.19	1377.33	1369.69	1314.45	1470.24	1173.55	1144.13	1195.39	1074.99	1206.76	1099.52	1300.95	1440.25	1203.4	1574.32	1363.93	1378	1213.31	1169.57	1091.47	1194.32	1114.37	1063.93	1137.26	1210.45
1429534_a_at	Immt	inner membrane protein, mitochondrial	0.0392711	0.00373	20.09	521.32	128.44	626.19	569.46	546.82	532.51	454.96	369.32	456.6	426.31	471.54	456.32	512.99	460.74	595.2	570.4	538.37	529.55	516.01	539.89	542.78	468.18	495.85	526.63	506.2	543.84
1429564_at	LOC100048247 /// Pcgf5	similar to polycomb group ring finger 5 /// polycomb group ring finger 5	0.023838	0.035	8.53	752.5	474.55	699.48	747.36	653.62	862.4	1035.69	960	1457.87	773.53	773.65	771.83	707.08	745.85	508.76	627.7	776.29	762.46	772.81	683.19	781.26	757.64	672.61	600.2	547.96	542.93
1429617_at	Cyld	cylindromatosis (turban tumor syndrome)	0.000437366	0.0021	19.82	166.23	63.35	209.38	240.24	213.54	198.21	154.29	113.54	182.2	128.58	130.81	141.83	169.84	218.78	235.87	204.2	227.91	210.48	125.06	154.57	169.22	160.1	134.27	131.87	156.28	163.24
1429618_at	Cyld	cylindromatosis (turban tumor syndrome)	0.0414886	0.0021	17.412	2531.64	439.97	2782.59	2640.3	2586.56	2501.96	2351.24	2171.14	2602.19	2136.6	2238.33	2310.18	2459.28	3008.71	2898.09	3016.53	2856.13	2857.74	2386.67	2509.88	2835.93	2553.4	2312.28	2355.46	2331.77	2562.11
1429625_at	2900054C01Rik	RIKEN cDNA 2900054C01 gene	0.00408953	0.00165	15.41	1628.83	1363.85	1635.81	2116.46	1621.84	1697.88	1119.73	1208.67	1831.59	1385.65	1359.41	1359.01	1969.91	3756.58	3010.79	2924.11	2831.49	2252.32	1288.13	1028.89	1297.91	1389.06	1246.13	1115.26	1827.61	1691.96
1429723_at	6330409N04Rik	RIKEN cDNA 6330409N04 gene	0.00726482	0.00527	16.93	2858.56	229.51	3127.52	3038.23	2844.09	2936.58	2788.51	2792.85	2812.88	2737.34	3029.67	2865.79	3124.25	3126.94	2857.71	3047.13	3196.36	2902.35	2745.28	2806.55	2763.78	2814.17	2859.41	2841.05	2839.84	2956.85
1429759_at	Rps6ka6	ribosomal protein S6 kinase polypeptide 6	0.000396243	0.000672	16.22	2335.33	997.24	2946.49	3074.96	2516.68	3052.76	2216.37	2130.6	2694.93	2029.1	2164.6	2119.23	2504.52	3735.7	3318.59	3789.99	3688.14	3458.2	2399.14	2134.02	2045.17	2253.78	1942.5	1795.51	2075.92	2271.51
1429760_at	Rps6ka6	ribosomal protein S6 kinase polypeptide 6	0.00376444	0.024	16.26	283.46	153.92	294.03	421.39	324.42	365.52	337.74	261.14	349.3	276.91	276.47	276.7	288.72	502.13	342.87	511.75	477.85	381.69	276.47	249.65	203.92	228.68	250.01	226.32	254.58	278.21
1429841_at	Megf10	multiple EGF-like-domains 10	0.000186874	0.0004	8.04	658.53	227.86	522.05	608.77	505.56	637.1	651.6	737.42	836.87	887.92	761.7	768.12	697.94	756.8	432.21	478.08	507.07	446.36	561.73	728.34	674.16	661.06	788.18	656	789.56	602.63
1430030_at	5330426P16Rik	RIKEN cDNA 5330426P16 gene	0.0109144	0.00918	15.98	233.26	148.52	239.17	261.62	271.64	287.06	237.95	129.62	284.93	200.45	179.9	208.64	240.46	426.65	358.89	352.03	390.93	243.23	228.56	182.68	160.23	213.22	197.88	174.94	216.78	214.76
1430041_at	Snrnp35	small nuclear ribonucleoprotein 35 (U11/U12)	0.00514965	0.00237	17.488	204.77	48.16	253.56	217.49	225.15	171.13	180.67	157.24	217.61	162.55	207.44	202.1	239.76	252.91	227.17	205.29	225.3	191.29	199.88	190.23	167.23	175.48	204.26	191.2	214.68	213.33
1430295_at	Gna13	guanine nucleotide binding protein, alpha 13	0.031712	0.0175	13.78	131.22	36.74	137.04	112.06	112.32	117.71	113.16	136.03	125.98	163.4	140.15	139.66	137.3	140.19	89.93	107.63	137.37	104.02	139.08	125.35	129.42	156.38	133.02	157.14	119.57	128.13
1430520_at	Cpne8	copine VIII	0.000175786	0.00391	16.54	275.3	299.29	364.83	346.34	246.01	290.67	301.48	309.35	333.34	204.83	137.8	154.58	195.1	422.92	724.17	589.58	612.01	407.59	340.19	183	125.59	163.82	143.24	137.5	199.24	259.94
1430579_at	Tnik	TRAF2 and NCK interacting kinase	0.00873999	0.00732	10.84	787.07	393.04	494.05	514.58	454.11	645.34	606.37	776.63	1073.67	849.28	848.83	796.63	591.83	486.47	686.15	945.94	841.61	920.78	1032.7	933.3	1240.18	1065.97	1050.83	673.39	777.51	590.01
1430982_at	LOC100048559 /// Sfrs1	similar to splicing factor, arginine/serine-rich 1 (splicing factor 2, alternate splicing factor) /// splicing factor, arginine/serine-rich 1 (ASF/SF2)	1.06e-05	0.000243	17.472	2023.98	474.45	2033.41	2313.64	2014.54	1946.64	2052.2	1897.49	1918.7	1777.78	1888.22	2048.29	2287.67	2515.27	2513.1	2459.33	2339.85	2120.39	1921.16	1779.7	1566.37	1776.57	1788.04	1797.3	2282.53	2200.25
1431020_a_at	Fgfr1op2	FGFR1 oncogene partner 2	0.00442243	0.0134	17.732	252.97	95.45	354.74	300.41	256.56	301.33	249.38	231.57	292.96	201.6	243.3	233.78	300.84	313.03	324.14	382.06	302.12	297.79	191.16	218.3	215.48	249.02	231.93	233.56	219.56	260.88
1431037_a_at	Elavl1	ELAV (embryonic lethal, abnormal vision, Drosophila)-like 1 (Hu antigen R)	0.0249132	0.0191	18.729	297.26	110.99	454.32	393.8	359.1	331.43	284.81	272.38	315.69	277.99	297.16	297.36	410.42	452.46	286.42	264.66	286.79	346.43	305.66	255.75	257.95	261.87	232.34	280.13	348.84	381.99
1431089_at	Cpsf2	cleavage and polyadenylation specific factor 2	0.0167048	0.0147	15.35	129.67	78.64	149.73	161.34	150.99	163.78	125.68	100.92	211.4	100.92	113.9	114.06	139.02	257.87	219.94	236.65	254.29	163.45	105.67	118.97	100.59	124.35	101.92	123.87	124.07	133.65
1431146_a_at	Cpne8	copine VIII	0.000248873	0.00122	15.99	150.67	154	218.79	186.59	148.89	172.02	143.02	143.04	158.71	104.52	123	121.79	158.68	340.87	377.39	292.48	358.96	186.2	152.45	117.73	69.38	109.26	126.08	122.71	135.02	167.49
1431293_a_at	Cldnd1	claudin domain containing 1	0.0057929	0.00316	4.1	1615.4	382.85	1445.06	1617.89	1703.98	1798.59	2004.17	1847.38	1792.63	1851.49	1788.43	1817.58	1713.63	1612.91	1238.47	1255.38	1381.05	1301.72	1307.7	1577.7	1503.42	1536.65	1717.98	1669.17	1350.6	1435.08
1431334_a_at	4933433P14Rik	RIKEN cDNA 4933433P14 gene	0.0126376	0.00954	19.75	577.82	178.08	740.83	714.64	580.38	577.82	514.56	426.3	492.14	445.69	577.81	531.31	645.35	587.77	502.13	782.45	728.33	512.06	611.51	546.37	529.46	579.73	501.78	612.05	576.35	689.43
1431415_a_at	Tbpl1	TATA box binding protein-like 1	8.78e-08	4.86e-05	20.12	430.74	81.98	485.29	486.29	478.04	434.94	381.19	329.1	364.54	381	372.96	431.56	460.66	482.14	493.06	433.99	437.78	429.91	396.19	354.86	394.3	358.85	423.8	399.31	459.22	474.14
1431429_a_at	Arl4a	ADP-ribosylation factor-like 4A	0.0485064	0.00596	13.51	1438.45	1090.8	1900.14	1781.48	1404.91	1296.99	1421.83	1414.63	2109.61	1301.55	1455.06	1727.39	1715.02	2633.38	2042.32	2438.62	3009.4	1576.88	1153.58	909.83	827.79	1078.1	1323.44	1270.94	1517.84	1327.47
1431734_a_at	Dnajb4	DnaJ (Hsp40) homolog, subfamily B, member 4	0.000509102	0.00297	20.54	444.68	133.98	558.04	569.04	519.37	547.24	397.74	301.08	412.76	349.93	372.66	387.79	475.61	543.45	464.25	490.24	488.42	561.93	404.89	454.8	434.47	415.55	390.54	371.28	434.56	490.11
1431784_a_at	Bxdc5	brix domain containing 5	0.0109785	0.00568	16.1	337.86	71.42	404.07	384.42	338.44	319.4	317.14	275.61	325.74	389.84	337.28	372.31	357.33	337.08	388.92	418.45	379.62	320.38	342.37	298.6	290.11	312.75	299.9	341.53	321.96	367
1431948_a_at	Pank2	pantothenate kinase 2 (Hallervorden-Spatz syndrome)	0.0283223	0.0125	15.68	492.32	105.06	516.62	457.6	491.81	481.09	437.65	439	522.17	513.48	551.82	499.38	530.23	473.35	360.56	395.25	384.71	471.76	476.21	514.66	512.46	548.59	492.83	570.69	468.95	500.18
1432156_a_at	Rnf32	ring finger protein 32	0.0347189	0.00813	21.65	121.56	37.49	137.58	131.3	118.92	139.99	113.99	80.88	139.41	88.55	107.66	106.44	117.91	124.36	147.6	135.06	121.7	155.87	124.26	114.68	107.21	121.42	88.79	111.67	125.01	149.39
1432517_a_at	Nnmt	nicotinamide N-methyltransferase	0.000359443	0.00613	10.74	174.13	253.83	118.3	87.63	125.91	138.15	235.62	296.52	595.29	279.43	243.62	241.63	130.25	169.2	131.94	98.43	157.17	253.21	248.59	208.62	158.65	206.57	218.48	179.05	99.48	94.5
1432543_a_at	Klf13	Kruppel-like factor 13	0.0167336	0.00104	13	376.26	99.88	397.72	373.88	338.62	388.58	376.65	392.19	359.33	429.66	439.23	461.01	424.4	382.68	402.04	365.7	321.73	274.86	299.35	335.42	375.87	330.5	375.24	474.63	388.86	352.84
1432827_x_at	Gm1821 /// LOC100048105 /// Rps27a /// Ubb /// Ubc	gene model 1821, (NCBI) /// similar to Ubc protein /// ribosomal protein S27a /// ubiquitin B /// ubiquitin C	0.000474436	0.00358	5.4	24307.5	3056.4	24293.1	23596.2	24196.3	24335.2	24321.9	25908.7	28189.1	24743	24114.1	24138	23242.7	22503.4	22076.3	24025.1	23958.8	24540	26019	25126.3	27940.5	26091.6	25598.5	23899.7	23724.2	24682.9
1433430_s_at	Cdc23	CDC23 (cell division cycle 23, yeast, homolog)	0.00450354	0.00213	16.63	648.08	285.34	702.33	672.24	693.17	618.21	576.91	521.19	628.81	621.54	611.69	658.94	688.31	722.14	1091.86	727.21	766.59	662.32	580.9	637.23	583.53	556.51	598.37	598.75	711.67	678.59
1433470_a_at	Immt	inner membrane protein, mitochondrial	0.00973055	0.00794	19.96	1246.82	296.07	1448.49	1395.01	1351.68	1232.38	1201.22	1159.33	1007.73	1249.06	1191.4	1208.58	1261.85	1152.46	1599.88	1388.35	1251.48	1223.18	1256.23	1247.85	1141.64	1165.88	1241.27	1301.49	1245.79	1249.12
1433482_a_at	Fubp1	far upstream element (FUSE) binding protein 1	0.000124635	0.000981	16.09	995.97	370.55	1043.91	1040	1013.58	1006.05	873.45	900.84	960.42	866.3	967.69	985.89	1112.51	1359.89	1506.99	1127.69	1100.19	1022.1	936.92	885.12	765.89	959.12	889.64	903.02	1045.16	1163.52
1433486_at	Clcn3	chloride channel 3	0.00143942	0.00122	8.17	2983.06	560.42	2503.82	2906.7	3011.78	2954.34	3053.42	3178.23	3298.65	3293.12	3491.77	3194.23	3093.36	2836.75	2667.28	2370.92	2816.49	2867.06	2713.58	3197.9	2928.52	3140.82	3071.08	2901.23	3053.43	2671.01
1433495_at	Glt25d1	glycosyltransferase 25 domain containing 1	0.00136783	0.0378	17.343	175.62	45.88	181.03	170.65	153.02	121.59	141.12	140.93	170.35	174.92	175.71	181.79	178.99	178.98	175.52	176.91	155.89	165.87	162.21	169.34	190.63	187.26	182.52	191.65	213.34	183.6
1433526_at	Klhl8	kelch-like 8 (Drosophila)	0.016811	0.00137	17.418	111.33	54.81	159.51	144.83	144.88	116.01	80.86	60.64	83.06	78.19	101	105.98	131.67	147.75	115.04	170.27	169.04	149.07	99.49	103.26	119.97	141.56	77.22	101.2	96.59	107.62
1433536_at	Lrp11	low density lipoprotein receptor-related protein 11	0.0166772	0.0124	16.84	3914.56	1009.69	4710.26	4322.76	4258.5	4220.58	3866.73	3923.67	4465.05	3868.85	3773.99	3703.16	3674.26	4511.71	5640.56	4716.24	4832.09	4481.23	3905.45	3774.49	3621.17	3818.43	3736.12	3958.48	3852.77	3630.11
1433542_at	Inpp5f	inositol polyphosphate-5-phosphatase F	0.00522787	0.00163	5.8	5031.84	1233.34	4767.36	4466.77	5217.32	5083.45	5066.88	5111.05	5330.73	4906.26	5081.15	4888.39	4678.64	3510.72	4550.58	4124.16	3610.33	5060.35	5003.33	5628.74	5873.22	5977.4	5131.24	5066.89	4864.14	4560.26
1433567_at	Gmps	guanine monphosphate synthetase	0.000740753	0.000841	17.526	382.06	85.27	458.05	411.33	436.1	369.42	339.56	358.09	376.63	387.49	404.91	411.54	459.74	482.27	430.9	356.72	328.33	358.15	366.78	334.02	311.74	372.59	375.11	402.11	387.7	428.17
1433575_at	Sox4	SRY-box containing gene 4	0.0108653	0.0174	15.35	2799.31	1276.98	2797.34	2992.64	3079.13	3141.75	2801.28	2630.56	3042.89	2653.04	2681.83	2546.71	2848.72	4518.69	3171.36	3817.94	4616.02	3503.16	2599.75	2298.55	2062.06	2381.56	2339.79	2312.77	2801.55	2726.83
1433592_at	Calm1	calmodulin 1	0.00104899	0.00242	19.79	11572.2	1835.57	12283.6	12073.5	12482	11711.4	11173.3	10525.1	10993.4	10717.7	11226.6	10841	11538.4	11939.7	14196.3	11910.8	12869	11606	11258.3	11645	10643.9	11624.8	10920.2	11066	11481.8	11656.3
1433605_at	Inpp5a	inositol polyphosphate-5-phosphatase A	0.00570216	0.00318	15.66	700.73	299.79	813.57	766.85	718.69	706.52	687.1	700.47	699.48	693.83	649.98	633.03	710.81	903.07	1230.17	849.65	883.92	848.65	702.82	645.88	649.06	631.25	630.6	664.56	700.07	700.98
1433632_at	Irf2bp2	interferon regulatory factor 2 binding protein 2	1.88e-05	0.000938	19.05	390.46	201.25	432.28	484.14	527.96	446.83	350.81	302.35	341.5	293.45	314.97	319.6	392.51	627.17	656.88	695.95	557.46	433.7	361.92	359.81	379.49	388.41	300.78	336.09	404.6	429.14
1433633_at	Irf2bp2	interferon regulatory factor 2 binding protein 2	3.51e-05	0.00426	19.55	379.76	159.98	448.85	506.4	497	464.25	385.57	355.17	383.02	320.08	336.35	351.39	429.69	590.84	426.79	567.88	598.6	430.45	332.46	314.75	343.63	320.21	294.1	278.64	376.5	372.07
1433648_at	Spag9	sperm associated antigen 9	0.0326004	0.0384	6.5	9772.63	1156.2	8733.09	9912.39	9837.94	10365.1	10077	10476.5	10515.9	9490.28	9530.66	9476.74	9585.67	9967.84	8429.76	9808.2	10742.2	9987.84	9610.13	9737.07	9923.92	10110	9282.9	8773.37	9363.65	8843.61
1433654_at	Mgea5	meningioma expressed antigen 5 (hyaluronidase)	0.0199426	0.000887	17.13	8023.79	1977.78	8354.49	8517.66	8073.67	8236.63	6961.01	7181.79	7862.83	6557.58	7193.97	7092.12	8016.79	10327.7	9791.55	10513.1	9525.12	9003.94	7922.48	7923.23	8679.7	8030.78	7833.64	7182.89	7748.42	8199.89
1433656_a_at	Gnl3	guanine nucleotide binding protein-like 3 (nucleolar)	0.00238522	0.0057	9.18	930.16	221.99	850.06	816.74	895.56	898.99	923.63	1099.61	1250.77	967.86	984.84	936.7	990.52	806.78	877.08	854.62	868.37	975.76	996.82	937.26	1099.9	1063.65	888.73	884.53	970.31	923.45
1433659_at	Tubgcp4	tubulin, gamma complex associated protein 4	0.0149406	0.00568	16.3	488.21	204.93	508.94	523.61	529.59	480.58	454.85	435.68	507.49	412.47	454.35	388.3	545.81	798.17	564.92	674.92	597.19	532.94	477.37	480.96	470.02	446.89	468.07	419.44	495.45	532.72
1433660_at	Tubgcp4	tubulin, gamma complex associated protein 4	0.00069594	0.00563	18.516	132.38	56.88	172.19	145.91	130.79	166.39	137.65	114.67	122.72	114.49	123.46	120.75	145.89	192.71	224.75	157.51	133.97	156.76	116.77	130.11	120.96	111	122.67	127	137.58	143.55
1433670_at	Emp2	epithelial membrane protein 2	7.56e-06	0.000375	7.3	560.28	186.72	399.87	483.08	502.61	586.18	568.18	590.63	653.28	760.51	561.92	462.92	407.11	466.19	387.08	466.95	498.56	629.34	634.08	589.46	668.76	594.88	558.64	561.96	463.77	499.84
1433691_at	Ppp1r3c	protein phosphatase 1, regulatory (inhibitor) subunit 3C	0.000435119	0.000566	21.77	1965.31	368.98	2000.29	2012.54	2110.33	2174.24	1824	1759.72	1879.37	1957.51	1603.01	1597.82	1700.87	1990.2	2197.46	2317.14	2066.45	2335.78	1979.09	2106	1973.1	1878.84	1716.69	1635.57	1796.45	1903.57
1433694_at	Pde3b	phosphodiesterase 3B, cGMP-inhibited	0.0306992	0.00465	15.98	713.88	350.81	774.55	725.67	653.31	747.71	584.57	554.74	748.95	518.14	620.42	604.19	750.07	1219.75	845.36	968.01	851.38	892.21	702.09	629.66	685.78	694.42	605	566.98	792.01	739.04
1433696_at	Hn1l	hematological and neurological expressed 1-like	0.00798216	0.0019	14.47	588.76	368.09	582.53	659.67	603.14	594.98	509.54	508.82	601.34	603.08	564.81	557.12	641.42	993.13	1153.39	761.91	884.71	705.26	520.42	498.48	417.21	491.13	531.61	537.49	573.32	620.07
1433700_at	4933433P14Rik	RIKEN cDNA 4933433P14 gene	2.54e-06	0.000202	18	1648.45	382.61	1937.03	1740.42	1775.63	1793.54	1644.16	1551.96	1436.57	1492.65	1652.74	1577.99	1938.28	2178.95	1854.45	1974.09	1799.31	1678.97	1530.42	1461.55	1497.18	1457.66	1413.73	1541.85	1626.13	1830.97
1433722_at	Akap13	A kinase (PRKA) anchor protein 13	0.0121008	0.0215	15.11	157.75	27.44	167.83	155.7	138.48	153.64	143.65	148.08	177.06	163.53	171.67	167.13	154.22	175.62	126.79	159.8	138.04	146.83	136.48	152.31	180.17	174.39	169.89	166.89	181.67	154.74
1433744_at	Lrtm2	leucine-rich repeats and transmembrane domains 2	0.015456	0.00102	13.9	839.59	465.51	1026.75	833.82	746.75	703.61	700.78	826.02	981.96	801.17	811.84	897.51	955.4	1349.97	1619.29	1301.45	1107.96	845.36	881.14	697.41	688.26	744.79	792.01	828.93	950.5	958.88
1433751_at	Slc39a10	solute carrier family 39 (zinc transporter), member 10	2.76e-05	0.000195	19.12	4713.78	922.48	4906.05	5111.25	5099.6	5125.9	4698.67	4238.86	4420.05	3902.87	4305.69	4251.92	4558.69	5518.46	5747.83	5366.32	5180.66	5522.22	4842.03	5031.2	4613.96	4406.07	4319.27	3998.95	4287.27	4728.89
1433806_x_at	Calr	calreticulin	0.00633254	0.0094	22	1657.14	343.09	1999.67	1746.84	1794.59	1737.71	1664.01	1551.49	1848.81	1435.28	1397.45	1368.97	1618.8	2055.15	1815.06	2043.27	1620.76	1756.28	1611.07	1617.53	1650.27	1537.07	1498.29	1590.96	1713.99	1837.43
1433827_at	Atp8a1	ATPase, aminophospholipid transporter (APLT), class I, type 8A, member 1	0.0128996	0.0017	20.63	2630.83	657.93	2594.51	2874.57	2757.21	3070.84	2626.48	2332.03	2540.15	2399.52	2202.72	2309.09	2138.7	2515.18	3454.55	3171.61	3046.83	3101.81	2719.92	2820.44	3040.49	2726.12	2635.18	2326.52	2457.84	2377.72
1433847_at	Fam40b	family with sequence similarity 40, member B	0.000349283	0.000289	9.42	159.7	154.81	128.3	150.64	133.5	194.83	191.94	187.1	371.48	337.14	360.33	249.27	165.69	94.63	112.76	61.87	103.51	184.82	153.71	126.88	152.39	292.45	331.1	227.89	133.47	102.71
1433850_at	Ppp4r2	protein phosphatase 4, regulatory subunit 2	0.00902205	0.00348	17.737	1932.54	544.96	2022.14	1955.54	1954.08	1962.6	1618.67	1764.18	1911	1674.96	1734.69	1757.44	2187.74	2635.62	2020.4	2210.25	2200.21	2209.98	1751.1	1545.71	1878.02	1853.85	1793.75	1606.28	2171.37	2161.48
1433852_at	Kidins220	kinase D-interacting substrate 220	0.0127994	0.00123	21.92	5014.18	968.39	4977.35	5054.21	5053.95	5412.54	4984.74	4685.01	5102.26	4297.31	4351.64	4464.14	4335.36	5475.4	5998.08	6234.09	5742.33	5956.08	5292.73	4896.51	5701.73	4873.62	4846.31	4541.3	4968.31	5043.62
1433855_at	Abat	4-aminobutyrate aminotransferase	0.00605203	0.0487	1.3	10858.1	2126.67	11124.5	12433.7	11248.5	11674.2	11285.6	10720.3	11337.8	10995.9	10646.3	10077.2	9613.52	9492.97	13746.3	12043.9	13263.6	11409.8	11403.7	10401.1	10080	10282.9	9681.76	9972.99	9998.58	10206.1
1433878_at	Mrps26	mitochondrial ribosomal protein S26	0.0175967	0.00721	9.04	1198.09	198.52	1241.32	996.23	1127.6	1036.79	1204.72	1369.58	1252.98	1306.49	1259.96	1243.6	1217.54	991.03	1134.47	1099.39	972.55	1020.12	1261.54	1241.72	1200.59	1173.2	1189.84	1258.96	1195.58	1189.98
1433887_at	Dnajc3	DnaJ (Hsp40) homolog, subfamily C, member 3	0.0273121	0.0175	15.25	2129.56	688.28	2133.25	2123.97	2319.28	2293.7	2041.92	1898.19	2261.91	1914.99	2115.03	2146.26	2460.28	3087.58	2125.87	2369.36	2349.21	2256.4	1884.72	1907.23	1711.03	1977.89	1948.18	1990.86	2270.53	2230.22
1433900_at	0610007L01Rik	RIKEN cDNA 0610007L01 gene	2.72e-07	0.00025	12.87	1281.39	168.43	1225.61	1172.81	1165.37	1167.98	1220.13	1276.61	1451.63	1395.61	1338.93	1349.8	1361.26	1293.32	1195.68	1114.76	1188.02	1202.86	1292.05	1351.56	1352.53	1407.27	1363.7	1264.41	1286.18	1270.13
1433901_at	Caprin1	cell cycle associated protein 1	0.00697685	0.0142	20.88	2897.59	276.02	3240.14	3134.98	3140.98	3167.81	2784.13	2707.85	2753.85	2749.12	2786.62	2739.49	3160.37	3206.27	2805.68	2986.85	2917.49	3259.88	2899.71	2777.54	2895.47	2832.38	2881.77	2802.51	3019.86	3117.11
1433909_at	Syt17	synaptotagmin XVII	9.4e-05	0.000641	15.32	1521.11	2184	2199.53	2462.24	1809.55	1887.3	1237.44	1169.97	1880.87	1111.78	1096.48	1144.65	1460.33	3939.83	5329.67	4458.28	4581.28	2630.18	1730.86	961.66	979.99	982.26	983.05	982.03	1418.9	1581.88
1433911_at	Smg6	Smg-6 homolog, nonsense mediated mRNA decay factor (C. elegans)	0.0249632	0.00323	15.19	228	74.99	223.96	232.04	239.76	238.57	207.65	199.62	208.95	223.09	252.61	234.05	236.74	252.44	328.34	261.51	267.34	211.22	221.12	213.55	210.76	178.36	220.8	207.43	255.46	234.34
1433913_at	C80913	expressed sequence C80913	0.00187231	0.00279	9.98	747.86	152.34	732.72	717.49	711.01	718.64	721.17	870.35	944.16	802.08	760.98	722.64	726.89	801.95	639.49	712.5	693.76	788.85	762.41	818.8	889.86	901.32	770.14	776.47	681.25	734.73
1434027_at	Rcan3	regulator of calcineurin 3	6.35e-05	0.000328	20.05	943.95	128.08	1057.85	1006.29	981.96	1020.1	943.46	843.54	850.33	886.29	925.32	929.32	1004.45	925.47	1078.21	1032.54	1099.71	1021.27	944.43	960.87	896.97	918.35	918.29	881.3	920.53	1060.75
1434052_at	AI593442	expressed sequence AI593442	0.00136102	0.0033	8.91	747.87	223.93	636.23	723.73	754.8	684.19	695.15	1047.78	921.92	803.08	833.34	787.78	667.83	651.62	697	639.42	695.09	861.43	744.48	769.69	846.62	790.37	751.25	801.5	623.19	599.92
1434055_at	Galnt9	UDP-N-acetyl-alpha-D-galactosamine:polypeptide N-acetylgalactosaminyltransferase 9	3.98e-06	0.00027	17.484	239.13	122.33	351.21	256.25	250.76	223.05	195.07	187.4	131.76	178.55	220.15	287.3	325.65	360.06	376.43	297.7	254.11	216.1	220.44	196.51	254.53	150.19	186.31	227.5	291.07	319.9
1434070_at	Jag1	jagged 1	0.00497344	0.0111	22.09	193.46	80.19	215.63	249.61	256.56	243.84	174.38	153.04	175.29	157.46	175	178.3	248.33	298.33	173.79	217.54	230.62	208.62	137.95	165.6	175.07	175.17	153.16	229.65	227.24	210.43
1434113_a_at	Rexo4	REX4, RNA exonuclease 4 homolog (S. cerevisiae)	0.0341785	0.00464	20.68	1109.32	213.73	1138.26	1052.55	1122.58	1102.74	1039.22	905.63	940.46	922.86	962.65	1016.16	1223.89	1156.66	1222.82	1227.55	1067.34	1200.81	1160.52	1119.04	1115.9	1022.6	1053.11	969.79	1315.07	1333.09
1434115_at	Cdh13	cadherin 13	0.00157944	0.00167	14.65	1274.05	906.74	1555.29	1250.24	1082.07	1040.16	901.2	969.45	1307.8	1257.81	1302.14	1284.87	1321.79	1981.57	2667.14	1795.36	1423.15	1015.08	986.71	853.66	914.53	1106.03	1309.71	1315.47	1348.48	1263.23
1434131_at	Rufy1	RUN and FYVE domain containing 1	0.0246342	0.00164	17.434	348.33	144.88	390.21	353.21	384.43	343.45	302.47	268.35	335.57	341.84	302.59	296.6	328.49	396.77	558.11	510.38	464.29	435.19	343.03	326.03	356.59	368.8	341.59	332.45	359.6	383.51
1434151_at	Mettl7a1	methyltransferase like 7A1	0.00179579	0.00168	18.244	1242.68	295.66	1473.12	1347.69	1223.16	1148.52	1251.68	1197.07	1268.74	1237.45	1116.38	1247.91	1276.69	1412.7	1445.55	1224.93	1207.52	1258.14	1078.46	1070.38	881.8	1017.76	1161.76	1312.12	1310.06	1378.2
1434194_at	Mtap2	microtubule-associated protein 2	0.0130134	0.00593	21.95	14347.3	2150.71	13846.7	15465.8	15296	15501.9	14494.6	12598.4	14263	13475.3	12914.1	13670.6	12932.3	14448.6	16899.8	15424.3	16350.6	14850.2	14360.3	14992	14125.1	14465.1	14334.3	12742.1	14010.5	13571.2
1434215_at	B230308N11Rik	RIKEN cDNA B230308N11 gene	3.58e-05	0.000875	18.795	207.63	105.04	256.57	272.37	227.1	268.65	171.96	147.27	197.87	149.64	174.99	163.75	242.32	357.35	262.12	273.18	317.07	295.87	179.54	196.11	171.51	170.87	173.9	154.01	217.39	233.97
1434246_at	L3mbtl3	l(3)mbt-like 3 (Drosophila)	0.0230946	0.0166	20.59	148.49	82.2	237.62	165.1	159.77	177.99	141.69	87.59	73.21	99.76	119.79	142.22	175.02	112.45	208.17	154.92	118.91	154.78	132.89	146.54	150.45	94.22	133.38	151.86	155.4	165.04
1434273_at	Fam174b	family with sequence similarity 174, member B	0.000871745	0.00158	16.61	172.41	66.94	215.78	191.75	172.03	137.23	148.75	164.11	172.79	152.52	146.49	157.06	196.25	242.51	263.91	224.68	203.99	226.78	178.18	141.62	160.43	140.62	130.04	177.38	166.52	217.58
1434296_at	BC049349	cDNA sequence BC049349	0.0095255	0.00331	14.77	190.81	69.55	193.76	205.78	203.5	234.2	169.35	169.51	216.52	174.18	185.6	187.63	223.8	244.46	294.83	274.66	257.14	196.23	169.86	187.85	155.72	174.21	164.65	164.27	200.85	187.53
1434332_at	Zzz3	zinc finger, ZZ domain containing 3	0.0165198	0.0126	19.45	370.67	72.26	393.54	447.82	390.65	363.49	352.32	339.87	308.76	323.61	350.83	381.82	443.54	402.66	453.28	348.88	389.13	347.18	366.08	385.36	362.49	375.26	359.75	349.83	391.71	380.13
1434347_s_at	---	---	0.00852827	0.00302	7.2	326.44	195.23	263.93	299.09	363.42	288.66	324.22	328.67	267.26	372.72	438.4	411.94	330.06	141.16	106.38	128.55	186.35	217.31	250.01	406.58	399.1	496.84	401.23	395.04	341.71	289.54
1434362_at	---	---	0.000635091	0.00763	12.1	192.61	48.05	169.78	186.56	186.4	189.55	193.8	183.91	214.58	252.95	207.81	210.13	191.21	228.4	156.84	184.2	186.38	176.11	190.19	215.77	246.98	245.5	241.68	203.72	202	191.42
1434367_s_at	ENSMUSG00000071497 /// ENSMUSG00000071868 /// LOC100044514 /// Nutf2	predicted gene, ENSMUSG00000071497 /// predicted gene, ENSMUSG00000071868 /// similar to nuclear transport factor 2 /// nuclear transport factor 2	0.0432022	0.011	15.19	9565.75	1325.4	9610.61	9570.42	9117.94	9447.97	9517.55	9195.41	8645.85	9769.68	9621.75	9193.85	9769.66	10747.5	9832.28	9569.32	10231.3	9705.35	9687.36	9229.78	8096.72	8392.55	9004	9336.61	9562.18	9817.46
1434391_at	Hnrnpu	Mus musculus, clone IMAGE:5039804, mRNA	0.00127602	0.0408	4	543.87	297.28	381.98	421.11	463.15	520.98	521.44	549.09	646.88	452.62	437.23	551.79	517.4	538.66	530.85	797.01	976.55	758.02	754.73	729.98	782.94	764.59	640.34	483.47	582.92	518.06
1434403_at	Spred2	sprouty-related, EVH1 domain containing 2	0.00435619	0.00126	6.6	1156.42	260.59	921.74	1117.31	1153.99	1297.01	1348.83	1257.39	1235.22	1158.86	1286.66	1270.52	1072.63	827.65	1002.22	844.97	847.86	1246.06	1234.09	1317.71	1115.46	1268.51	1257.84	1122.21	1120.41	1065.4
1434414_at	Foxred2	FAD-dependent oxidoreductase domain containing 2	2.02e-05	0.000612	13.34	495.62	109.44	466.79	497.24	476.23	478.28	494.43	490.31	554.64	547.65	609.61	590.2	530.95	444.57	453.87	415.19	390.74	446.81	490.57	518.16	581.1	579.23	541.55	496.81	489.48	498.95
1434419_s_at	Tardbp	TAR DNA binding protein	9.78e-05	0.00229	20.45	144.94	36.89	180.37	178.92	166.05	145.39	152.07	111.53	140.75	127.39	134.03	120.18	144.5	185.32	158.27	150.87	173.25	147.96	136.18	141.66	129.39	117.06	124.04	143.46	145.84	148.28
1434460_at	Bbs4	Bardet-Biedl syndrome 4 (human)	0.00865342	0.00767	18	721.26	216.87	725.85	821.14	789.5	719.11	689.77	657.41	587.79	694.61	723.08	812.73	828.72	703.92	989.76	760.44	744.97	718.88	704.69	735.17	556.03	670.71	688.94	729.86	780.18	719.43
1434470_at	Syt13	synaptotagmin XIII	0.0295728	0.0166	10.01	1979.87	545.06	1958.93	1724.32	1704.67	1773.91	2191.49	2549.03	2683.21	2225.04	1931.56	1868.98	1643.94	1593.08	2233.54	2037.84	2025.53	1979.51	2174.46	1970.49	2102.27	2084.48	1980.23	1998.67	1740.58	1678.93
1434472_at	Dusp3	dual specificity phosphatase 3 (vaccinia virus phosphatase VH1-related)	9.23e-05	0.000529	6.4	781.41	202.46	688.95	703.02	759.56	816.52	770.43	966.56	1083.39	986.81	767.97	728.57	723.05	762.39	725.8	678.47	690.57	792.39	850.75	799.53	947.61	874.18	856.03	809.61	755.19	794.72
1434480_at	4930402E16Rik	RIKEN cDNA 4930402E16 gene	0.0020721	0.00274	9.23	163.29	56.63	131.59	163.34	145.56	140.82	195.48	181.94	158.65	174.85	179.39	195.87	164.24	136.56	97.44	122.2	158.24	136.3	164.55	196.99	170.11	210.7	166.8	163.24	136.96	136.05
1434481_at	Msl1	male-specific lethal 1 homolog (Drosophila)	0.0294677	0.0162	18	660.44	121.94	807.38	668.75	681.61	653.15	607.88	618.73	563.49	667.23	633.99	667.82	697.43	636.66	791.93	747.24	662.8	643.52	647.46	639.52	688.25	650.56	612.79	663.26	658.07	677.21
1434487_at	Mef2d	myocyte enhancer factor 2D	0.000548897	0.00172	5.6	815.35	163.1	708.71	733.09	742.17	859.71	893.15	845.42	1034.92	820.84	813.39	734.47	783.6	763.52	794.08	777.81	771.25	830.64	831.72	863.54	947.56	936.56	930.45	817.31	802.12	804.49
1434501_at	Ypel4	yippee-like 4 (Drosophila)	0.00248805	0.00772	7.6	424.62	124.54	339.47	327.45	358.8	342.49	462.87	450.77	523.07	438.51	432.71	405.32	357.95	273.99	463.58	402.92	361.82	421.91	437.91	475.72	501.11	516.82	427.33	471.87	415.67	369
1434511_at	Phkb	phosphorylase kinase beta	0.014418	0.0223	3.83	1417.45	308	1315.09	1675.63	1547.84	1683.77	1604.33	1719.01	1542.83	1470.31	1401.52	1326.3	1288.71	1349.24	1103.01	1335.09	1586.82	1519.06	1470.31	1479.4	1371.1	1410.19	1386.56	1424.71	1252.68	1395.99
1434520_at	Sc5d	sterol-C5-desaturase (fungal ERG3, delta-5-desaturase) homolog (S. cerevisae)	4.78e-05	0.000712	17.205	727.91	148.83	817.12	776.45	733.58	755.52	639.46	593.48	718.41	670.98	705.44	722.24	835.23	891.14	787.38	889.41	820.91	783.3	647.51	683.5	619	638.68	711.66	615.52	797.93	816.65
1434524_at	Eif2b3	eukaryotic translation initiation factor 2B, subunit 3	0.00589307	0.00426	15.4	385.72	80.04	400.35	362.73	388.34	381.46	370.69	340.89	370.45	476.63	431.71	428.89	401.1	347.25	383.1	351	342.56	327.96	391.98	394.98	408.07	422.48	434.34	488.05	372.57	370.44
1434536_at	Gpr75	G protein-coupled receptor 75	0.0258396	0.00653	17.22	163.13	43.32	178.67	163.02	174.67	143.13	163.25	125.14	178.36	135.42	153.63	178.93	165.99	204.89	190.77	190.07	195.26	161.89	118.25	142.39	162.81	157.32	148.88	144.34	184.45	174.16
1434539_at	Lrrn3	leucine rich repeat protein 3, neuronal	0.0386333	0.00794	15.1	2334.27	606.47	2774.91	2541.26	2640.15	2260.73	2089.73	2040.04	2959.21	2188.52	2327.67	2384.66	2431.82	3203.93	2870.09	2750.24	2784.65	2722.97	2257.12	1993.21	1991.49	2218.31	1990.99	2001.45	2238.2	2340.88
1434542_at	Gpt2	glutamic pyruvate transaminase (alanine aminotransferase) 2	1.75e-06	0.000114	18.462	276.02	84.27	346.54	312.31	322.02	277.36	258.26	216.84	196.8	273.44	292.45	364.55	365.35	315.72	359.06	260.86	255.12	224.18	240.92	235.74	230.17	239.26	274.68	343.63	322.53	359.32
1434552_at	Wdr77	WD repeat domain 77	0.0235297	0.00258	14.9	924.87	243.02	979.94	930.06	927.48	922.26	768.39	689.1	1013.41	914.4	888.85	948.76	959.74	1118.44	1175.13	978.44	949.89	1008.94	839.06	810.03	808.87	906.61	867.14	907.82	905.55	936.25
1434555_at	Anp32a	acidic (leucine-rich) nuclear phosphoprotein 32 family, member A	0.000244693	0.00127	18.534	2188.92	396.35	2724.92	2411.12	2416.19	2465.14	2058.36	2174.16	2107.8	2141.14	2094.08	2099.7	2191.87	2803.62	2830.41	2750.45	2445.57	2350.11	2185.96	2177.91	2353.83	2123.86	2037.72	2133.22	2163.35	2363.64
1434562_at	Mfap3	microfibrillar-associated protein 3	0.000334966	0.00206	19.65	264.44	43.71	305.1	257.71	274.13	275.14	264.37	232.39	242.08	251.79	253.15	276.64	270.74	301.99	265.78	278.15	298.68	263.33	231.73	217.68	238.2	254.42	255.26	264.51	282.96	271.28
1434565_at	Cgrrf1	cell growth regulator with ring finger domain 1	0.0141581	0.00039	5.7	1065.25	240.2	1087.94	1052.9	1030.89	1046.96	1046.26	1099.28	1165.44	1286.5	1196.79	1198.64	1150.71	1159.46	1026.75	940.6	932.9	806.1	1025.28	985.25	924.47	1077.59	1049.59	1183.59	1090.58	1124.04
1434572_at	Hdac9	histone deacetylase 9	0.00201926	0.00433	15.67	1158.55	949.16	1316.95	1511.66	1231.15	1318.28	1149.95	1081.88	1426.04	1058.07	913.96	1043.29	1167.16	2435	1951.67	1862.39	2501.23	1588.31	1118.74	813.05	602.91	913.34	871.37	844.12	1083.38	1185.32
1434585_at	Tulp4	tubby like protein 4	0.00379918	0.000835	6	252.91	127.04	229.87	234.42	208.07	255.54	285.99	314.74	302.78	437.56	287.66	262.57	233.38	246.19	218.31	207.93	196.5	183.47	220.78	238.85	274.54	273.95	264.21	257.57	265	250.28
1434609_at	Vprbp	Vpr (HIV-1) binding protein	0.0288949	0.00482	16.9	588.48	129.08	605.08	589.61	630	616.25	469	468.32	546.99	556.24	555.4	593.65	594.95	619.75	710.68	726.48	611.14	563.02	557.17	564.95	594.21	575.11	504.28	501.78	647.93	587.35
1434629_at	Zbtb26	zinc finger and BTB domain containing 26	0.00303856	0.00324	18.514	136.62	51.62	136.09	162.36	144.13	137.15	97.55	90.55	141.41	100.97	104.67	118.81	161.58	189.61	193.78	147	167.98	151.02	103.65	112.67	119.63	136.06	105.84	98.14	164.58	148.53
1434637_x_at	Sin3b	transcriptional regulator, SIN3B (yeast)	1.95e-06	0.000832	10.92	765.86	233.84	693.21	574.19	585.41	608.36	627.08	772.56	936.34	1041.88	880.33	828.9	776.94	780.93	621.25	590.11	699.71	650.33	768.54	716.03	775.96	763.19	898.43	999.68	848.34	703.53
1434679_at	Ncan	neurocan	0.0465199	0.0323	8.34	833.73	216.1	803.01	827.7	818.92	903.04	957.2	825.64	1038.3	891.12	839.75	758.25	615.47	760.58	1038.95	895.32	1047.67	945.87	922.83	842.9	795.76	755.69	877.54	650.37	734.79	694.41
1434705_at	Ctbp2	C-terminal binding protein 2	0.017466	0.0312	23.69	3773.12	533.85	3634.95	3864.28	4090.08	4026.21	4152.75	3547.8	3581.51	3493.15	3583.96	3963.51	4166.67	4266.91	3988.84	3998.72	4393.75	3958.88	3681.95	3621.33	3326.05	3398.15	3679.82	3467.91	3940.07	3592.49
1434708_at	Vhl	von Hippel-Lindau syndrome	0.0239737	0.0151	18	296.35	71.16	346.44	306.78	352.28	321.32	279.55	238.29	284.32	305.68	288.33	292.26	308.2	346.05	380.61	333.67	324.59	265.26	296.43	293.5	292.76	296.27	238.47	286.14	302.16	292.05
1434710_at	Dhx29	DEAH (Asp-Glu-Ala-His) box polypeptide 29	0.000108464	0.000769	18.522	263.69	107.63	288.49	312.51	284.96	305.5	242.46	219.16	248.75	233.65	222.12	248.29	306.09	344.47	419.44	353.6	273.26	299.89	247.19	241.44	244.99	259.42	204.18	253.24	267.97	293.74
1434715_at	1600014C10Rik	RIKEN cDNA 1600014C10 gene	0.0162689	0.0175	19.01	230.56	68.66	292.17	266.71	263.36	218.03	221.65	207.31	175.42	218.25	225.49	235.26	242.12	229.53	312.75	238.24	231.6	217.02	231.8	227.6	233.09	231.8	214.64	229.47	222.96	239.63
1434738_at	Tarsl2	threonyl-tRNA synthetase-like 2	9.5e-07	0.000272	16.87	570.67	623.04	831.75	841.68	743.77	584.27	506.97	379.31	373.57	335.17	453.74	518.46	631.74	1203.33	1581.25	1290.08	1177.32	831.18	557.07	505.48	452.86	481.37	442.71	432.38	607.67	651.51
1434742_s_at	Aifm3	apoptosis-inducing factor, mitochondrion-associated 3	0.0125652	0.0175	3.11	706.08	330.63	652.81	612.97	694.13	660.17	667.9	762.92	614.09	732.74	662.31	631.6	586.19	408.53	634.23	698.03	714.13	902.4	970.91	888.46	1069.79	913.79	805.13	824.54	776.95	785.58
1434766_at	---	---	0.000628383	0.00404	10.23	487.04	419.44	316.25	374.97	342.9	490.66	514.86	637.05	1130.89	649.31	600.21	483.41	385.89	491.28	321.28	420.87	531.51	504.93	515.17	482.88	538.24	560.17	464.78	373.68	333.39	292.01
1434768_at	Tpp1	tripeptidyl peptidase I	0.00777934	0.0125	10.09	1245.22	183.58	1205.31	1185.26	1081.85	1089.55	1292.21	1328.75	1449.01	1447.44	1150.68	1230.76	1137.22	1240.5	1167.36	1202.29	1243.84	1275.14	1387.7	1287.66	1393.22	1323.1	1403.1	1300.45	1246.6	1207.22
1434769_at	Btbd9	BTB (POZ) domain containing 9	0.0266511	0.00862	15.07	181.92	49.82	190.98	176.97	180.9	211.34	155.5	169.03	214.31	231.22	223.83	181.77	209.76	177.77	166.12	149.22	149.38	157.27	178.1	210.71	248.86	208.98	182.08	193.58	178.08	185.08
1434770_at	Iqcb1	IQ calmodulin-binding motif containing 1	0.000842144	0.00332	18.26	464	97.93	487.02	463.68	496.18	471.25	457.87	421.07	464.31	411.79	420.04	455.37	502.96	592.65	536.84	577.31	544.04	536.06	418.23	397.68	397.16	461.74	447.68	396.79	544.16	505.63
1434777_at	Mycl1	v-myc myelocytomatosis viral oncogene homolog 1, lung carcinoma derived (avian)	7.35e-07	0.000226	18.482	162.12	77.92	223.54	194.1	192.18	163.73	115.12	120.55	113.35	168.75	159.85	160.5	199.26	263.59	246.56	178.81	187.11	107.75	122.38	123.13	131.43	135.03	149.81	159.7	198.59	193.34
1434779_at	Cbln2	cerebellin 2 precursor protein	0.000370977	0.000195	18.283	527.61	186.13	557.44	543.7	550.24	546.94	445.44	465.2	392.96	347.11	460.14	406.25	504.65	676.55	719.36	650.02	603.61	713.2	629.21	534.47	520.76	403	407.84	468.73	415.79	592.52
1434816_at	Vps33a	vacuolar protein sorting 33A (yeast)	0.00620747	0.00349	17.232	448.71	89.44	501.09	484.51	496.98	442.89	400.46	371.52	377.17	474.85	481.93	434.04	522.87	524.67	550.4	435.67	505.54	411.16	409.31	434.68	426.89	454.14	407.87	461.34	443.29	460.12
1434835_at	Wapal	wings apart-like homolog (Drosophila)	0.0140744	0.0284	20.82	214.41	73.64	250.8	274.37	239.15	266.99	191.1	169.58	226.11	172.51	192.05	195.36	236.4	316.86	211.47	245.62	217.03	259.87	178.14	172.26	216.86	198.57	185.61	201.34	227.79	211.96
1434842_s_at	Upf3b	UPF3 regulator of nonsense transcripts homolog B (yeast)	0.0069258	0.000355	15.72	2022.01	549.57	2032.91	2061.18	1912.04	1946.07	1765.63	1642.18	1942.04	1814.4	1909.59	2044.85	2307.72	2741.32	2511.51	2668.69	2594.6	2267.59	2013.13	1941.78	2030.9	1978.56	1962.83	1890.67	2320.21	2256.86
1434888_a_at	Matr3	matrin 3	0.00076018	0.00509	22.52	12209.4	1643.77	13084.3	12631.2	12532.5	13400	12479.6	11844.5	10920.2	11035.7	11399.8	11109.2	12082	12313.8	14207.7	12263.3	12231.8	12767.1	11896.5	12632.9	11199	12187	11350.1	11193.5	12102.2	12406.3
1434895_s_at	Ppp1r13b	protein phosphatase 1, regulatory (inhibitor) subunit 13B	0.000357149	0.000402	16.35	1172.71	398.75	1447.19	1329.98	1151.73	1151.55	956.32	1027.53	1247.42	1086.27	1116.13	1119.99	1413.65	1753.82	1665	1551.79	1465.81	1291.42	1193.69	1001.27	1146.59	1114.77	1096.45	1092.52	1389.64	1295.21
1434919_at	---	---	5.49e-05	0.000472	10.25	102.22	15.43	99.63	98.33	100.16	106.61	106.02	112.02	124.52	115.31	110.08	104.27	105.9	99.33	98.82	99.92	100.05	100.15	99.02	117.52	114.84	107.3	108.3	99.18	95.18	93.65
1434940_x_at	Rgs19	regulator of G-protein signaling 19	0.0238467	0.0134	16.65	684.43	191.83	652.49	803.66	740.39	693.86	626.29	563.5	562.56	644.71	719.96	702.14	812.53	864.2	686.27	588.75	814.59	738.51	682.58	649.8	480.54	505.58	550.83	648.43	690.12	727.01
1434945_at	Lpcat2	lysophosphatidylcholine acyltransferase 2	0.0104547	0.00226	5.2	158.62	58.67	147.53	160.63	156.6	161.33	178.96	152.63	163.32	195.08	169.55	147.45	133.11	109.51	110.58	128.4	107.24	145.55	146.45	205.65	217.09	190.95	208.33	224.58	147	168.2
1434964_at	Amz2	archaelysin family metallopeptidase 2	0.0159063	0.00249	19.06	353.53	70.29	436.71	373.79	399.53	340.09	325.06	296.14	313.02	322.96	334.08	334.42	373.29	345.59	386.32	417.03	401.39	379.28	328.9	333.63	391.81	361.47	341.84	338.53	374.03	368.28
1434990_at	Ppm1e	protein phosphatase 1E (PP2C domain containing)	3.2e-05	0.000598	19.75	819.72	289.47	966.24	966.23	954.69	932.71	817.83	633.64	535.19	661.29	776.14	770.53	917.87	1114.14	972.86	912.78	870.41	888.94	768.62	729.03	794.52	783.06	652.05	729.94	821.61	877.92
1435006_s_at	Abcb7	ATP-binding cassette, sub-family B (MDR/TAP), member 7	0.004734	0.0032	18.598	1118.96	202.23	1219.93	1217.26	1234.79	1254.36	1039.43	900.92	1158.74	880.9	997.75	1010.41	1026.88	1202.81	1191.68	1285.36	1278.32	1281.02	1073.25	1114.33	1123.58	1217.79	950.05	949.01	961.55	1082.35
1435030_at	Upf2	UPF2 regulator of nonsense transcripts homolog (yeast)	0.0205918	0.013	19.34	1191.22	183.12	1301.16	1304.18	1228.29	1188.22	1187.95	1091.72	1272.84	1060.85	1032.3	1062.96	1301.65	1398.54	1178.92	1378.97	1264.59	1276.28	1156.81	1263.02	1115.47	1194.21	1112.8	1081.25	1135.52	1259.7
1435052_at	4930455F23Rik	RIKEN cDNA 4930455F23 gene	0.00362542	0.00232	17.711	281.97	64.43	306.58	279.43	298.92	289.29	285.36	269.26	284.5	257.37	249.61	252.01	271.39	338.54	375.39	339.02	302.55	355.51	351.18	278.51	276.95	246.54	259.47	270.67	276.42	290.95
1435055_a_at	EG545878 /// Tom1	predicted gene, EG545878 /// target of myb1 homolog (chicken)	0.00520047	0.018	11.92	1427.89	210.59	1449.15	1247.37	1262.73	1244.02	1254.06	1475.16	1649.98	1557.4	1438.76	1444.8	1349.1	1428.95	1237.3	1483.22	1228.79	1281.75	1344.15	1374.3	1556.51	1464.67	1531.33	1426.83	1421.05	1481.82
1435061_at	Nudt10 /// Nudt11	nudix (nucleoside diphosphate linked moiety X)-type motif 10 /// nudix (nucleoside diphosphate linked moiety X)-type motif 11	0.00458217	0.0206	21.56	2219.69	532.69	2274.43	2549.21	2577.46	2426.68	2387.68	2217.13	1869.29	2163.57	2200.83	2219.19	2353.89	2630.85	2736.36	2171.65	2391.99	2563.52	2284.29	2101.73	1670.99	2101.9	2111.95	2038.31	2202.38	2220.18
1435074_at	Tmem106b	transmembrane protein 106B	0.0059903	0.000962	19.39	7250.38	1154.47	7923.82	7955.6	8117.78	7736	6488.01	6277.25	7089.98	6653.12	6409.08	6551.39	7007.3	8561.17	7426.95	8586.2	8246.23	8048.95	7160.71	7207.83	7948.63	7292.93	6740.7	6855.68	7041.18	7463.96
1435096_at	Ric8b	resistance to inhibitors of cholinesterase 8 homolog B (C. elegans)	6.1e-06	0.000303	18.271	936.88	145.76	1090.06	1020.81	1024.7	1066.25	865.56	822.84	898.46	813.04	916.63	915.09	1030.85	1104.55	1070.9	1098.91	1037.93	1016.26	964.71	903.28	918.93	846.12	827.65	843.16	925.28	948.48
1435135_at	Aadacl1	arylacetamide deacetylase-like 1	0.00430142	0.000249	6.4	1843.13	841.43	1778.45	1621.71	1750.74	1710.35	2201.54	2353.23	1955.18	2073.19	2007.12	1885.83	1656.36	1195.68	670.38	1138.15	1370.06	1374.92	1908.31	2108.16	2229.19	2121.75	2019.96	2068.53	1637.7	1800.43
1435138_at	AW121567	expressed sequence AW121567	0.0170239	0.0146	16.63	2217.44	665.01	2544.51	2347.49	2320.01	2221.67	2228.71	2114.11	2303.95	2213.22	2149.96	2152.83	2136.88	2597.68	3141.51	2417.44	2484.82	2031.21	2263.24	2042.16	1811.48	2004.04	2129.66	2027.35	2047.05	2348.09
1435158_at	Rbm12b	RNA binding motif protein 12B	0.000544497	0.00193	20.71	315.99	146.48	307.22	332.29	438.29	336.27	336.2	259.85	232.5	217.97	271.63	377.75	502.22	473.45	376.49	324.75	345.35	290.52	239.77	264.02	209.25	283.72	252.68	269.12	476.56	427.98
1435160_at	Ahsa2	AHA1, activator of heat shock protein ATPase homolog 2 (yeast)	0.0150171	0.00401	19.5	669.1	305.79	825.11	635.58	687.43	650.76	559.57	475.94	519.89	439.77	459.1	565.43	825.75	828.11	1051.35	837.94	620.51	752.2	724.92	582.78	767.05	695.36	584.24	548.02	924.55	899.76
1435162_at	Prkg2	protein kinase, cGMP-dependent, type II	0.0004312	0.000988	15.05	711.47	976.39	977.66	1068.96	741.33	801.34	532.52	510.34	864.92	635.94	618.59	586.08	838.22	2008.07	1971.11	2144.84	2314.01	930.44	584.03	410.59	361.23	404.08	496.1	533.67	681.62	786.9
1435176_a_at	Id2	inhibitor of DNA binding 2	0.0112965	0.0328	8.18	5259.04	1828.27	4657.26	5998.51	6177.31	6329.71	6838.58	7128.74	6235.21	5703.97	5119.69	4182.61	4264.32	5467.51	4611.54	5486.35	6833.95	4992.32	5398.38	6718.94	3472.21	4404.2	4353.4	4353.04	4099.07	4248.85
1435188_at	Gm129	gene model 129, (NCBI)	4.91e-07	8.3e-05	6.2	120.56	121.14	74.65	72.28	84.78	98.7	191.33	237.71	264.03	187.64	137.69	125.42	69.84	21.74	46	52.49	79.07	115.69	170.62	162.79	176.01	177.36	171.15	167.55	88.54	66.32
1435189_at	Frmpd1	FERM and PDZ domain containing 1	0.000427357	0.0031	22.98	112.3	60.65	117.15	114.59	145.85	141.43	109.08	104.2	109.72	109.84	97.91	90.4	110.01	143.12	190.53	144.88	195.93	137.42	127.02	97.35	99.83	84.34	80.57	74.63	123.78	115.03
1435209_at	BC057079	cDNA sequence BC057079	0.0180973	0.00285	16.34	177.76	33.01	181.84	176.49	169.65	176.12	164.31	150.46	169.55	163.27	171.65	182.73	179.6	216.48	197.65	192.75	189.03	177.5	186.61	178.03	174.12	176.71	178.02	177.04	191.87	183.95
1435213_at	Nhlrc1	NHL repeat containing 1	0.00183789	0.00156	16.9	664.36	200.81	743.36	747.64	693.83	644.81	595.86	577.29	665.05	673.26	663.67	656.97	658.1	756.18	978.91	733.99	791.22	693.39	668.82	622.3	607.05	614.74	609.7	622.31	644.41	742.58
1435245_at	Gls2	glutaminase 2 (liver, mitochondrial)	0.0407329	0.0267	5.1	278.94	130.92	272.77	215.85	312.14	256.41	270.42	257.16	261.03	282.34	278.85	303.26	279.03	184.78	187.91	172.09	141.1	249.46	315.37	320.13	378.62	402.93	280.02	343.12	308.84	304.27
1435250_at	Ints8	integrator complex subunit 8	1.23e-06	0.000636	18.502	449.8	153.38	486.6	529.22	479.32	467.37	403.05	383.99	381.97	357.58	405.92	432.23	577.53	641.1	565.24	475.46	472.07	492.04	387.71	334.35	348.09	377.09	344.14	372	514.38	516.15
1435252_at	B3galt6 /// LOC634148	UDP-Gal:betaGal beta 1,3-galactosyltransferase, polypeptide 6 /// similar to UDP-Gal:betaGal beta 1,3-galactosyltransferase, polypeptide 6	0.0284052	0.0096	15.37	263.66	96.66	265.95	321.69	314.68	262.76	251.82	233.97	275.67	248.49	264.57	260.22	317.42	365.39	287.85	294.15	359.72	284.28	289.51	250.23	172.06	224.54	245.16	232.78	229.48	251.42
1435261_at	Tmtc1	transmembrane and tetratricopeptide repeat containing 1	0.0167716	0.000659	16.55	719.24	240.16	789.79	770.67	733.62	751.1	610.24	491.71	742.92	569.44	667.91	671.56	730.02	954.26	929.92	933.99	972.03	841.79	659.13	694.61	717.71	718.55	687.8	679.89	677.57	719.93
1435270_x_at	N6amt2	N-6 adenine-specific DNA methyltransferase 2 (putative)	0.0065629	0.00185	14.41	633.85	131.18	699.53	634.6	643.39	631.4	653.27	635.72	623.66	632.28	625.77	686.34	758.81	839.13	715.55	658.19	627.03	632.47	631.43	628.83	630.43	576.77	619.13	633.09	667.3	740.63
1435280_at	AI452195	expressed sequence AI452195	2.4e-07	6.58e-05	6.1	1476.21	452.22	1258.7	1293.54	1484.88	1667.41	1791.43	1760.05	1921.33	1559.65	1467.53	1354.86	1262.47	1065.75	1099.82	1037.93	1106.49	1577	1567.59	1776.3	1873.5	1942.37	1567.07	1430.72	1275.09	1330.42
1435328_at	Cyhr1	cysteine and histidine rich 1	0.00830554	0.0224	22.41	369.09	131.45	453.31	373.08	444.82	406.63	363.23	372.4	339.35	358.63	311.8	289.68	332.46	357.67	552.59	407.54	378.77	395.16	402.66	375.71	339.27	365.77	326.76	363	329.11	384.64
1435339_at	Kctd15	potassium channel tetramerisation domain containing 15	0.0445821	0.000724	17.418	107.66	31.48	109.47	107.64	107.68	97.59	93.85	86.52	95.99	84.66	95.74	90.84	106.68	118.45	117.86	147.62	122.81	123.39	118.1	97.07	116.26	107.97	96.87	93.4	112.46	110.4
1435367_at	Mapk4	mitogen-activated protein kinase 4	0.0356538	0.00801	11.67	260.19	65.5	275.08	254.51	249.07	253.14	240.7	285.16	219.96	340.76	289.01	265.86	302.66	233.69	272.45	209.76	225.14	222.57	230.84	239.93	271.2	248.99	273.7	310.16	286.3	279.47
1435369_at	Fastkd5	FAST kinase domains 5	0.000360512	0.000941	15.63	383.72	150.47	451.38	385.84	451.01	332.47	344.02	322.87	381.61	399.37	358.2	462.79	499.58	601.25	411.12	401.31	453.85	348.31	326.56	300.31	319.64	326.67	351.89	333.92	511.14	466.81
1435387_at	Slc2a13	solute carrier family 2 (facilitated glucose transporter), member 13	0.00362399	0.015	10.18	5330.37	4425.21	3518.13	3695.52	3310.79	3759.49	5305.36	7085.54	12161.2	7535.01	6248.12	6235.02	5283.37	7669.8	5139.52	5135.1	5238.77	4559.41	4992.6	5454.69	6412.3	6796.34	6953.78	5458.21	5355.38	4158.7
1435439_at	Dgcr8	DiGeorge syndrome critical region gene 8	0.000214387	0.000438	17.464	276.74	95.46	299.58	286.98	281.36	294.86	234.68	213.22	241.97	233.73	265.65	234.39	304.67	400.64	338.11	356.1	323.48	291.91	240.79	236.51	272.12	248.85	209.73	225.81	302.25	314.8
1435441_at	Ablim2	actin-binding LIM protein 2	0.0117278	0.0116	18	119.78	33.09	143.54	123.99	116.18	96.98	93.56	84.43	98.5	144.39	141.35	111.96	147.64	112.5	150.61	94.67	124.61	103.62	108.2	99.92	112.49	143.61	131.31	144.79	123.38	142.15
1435460_at	Prkg2	protein kinase, cGMP-dependent, type II	0.00110549	0.00125	15.05	662.06	903.35	942.93	1030.42	685.82	733.93	474.83	523.78	932.44	539.7	547.07	622.65	777.85	2133.08	1617.79	1924.83	2140.15	1028.28	503.34	371.9	333.44	401.22	422.32	470.74	658.07	666.05
1435475_at	Lman2l	lectin, mannose-binding 2-like	4.57e-05	0.00214	18	1008.05	496.05	1124.13	1135.97	1057.42	1242	1020.92	925.55	964.07	879.41	846.17	743.24	900.15	1234.07	1735.35	1416.58	1210.01	1268.2	1141.81	998.44	969.96	820.05	747.71	763	813.85	1017.65
1435484_at	Slc5a3	solute carrier family 5 (inositol transporters), member 3	0.013396	0.0235	23.21	3961.43	1329.79	3734.43	4317.84	4060.66	4449.27	4213.48	3448.61	4319.73	3557.49	3414.58	3344.69	3822.68	5623.93	4368.87	4505.44	4601.27	4466.48	4086.82	3888.43	3754.7	3350.32	3593.39	2964.35	3949.65	3973.21
1435526_at	Tor1aip2	torsin A interacting protein 2	0.0070929	0.0105	10.62	274.26	140.72	200.37	246.3	222.55	260.94	260.18	295.24	481.81	322.52	272.93	301.29	248	232.15	230.77	262.09	337.86	331.17	275.6	345.04	276.13	356.36	295.43	286.59	240.8	231.72
1435527_at	Nfic	nuclear factor I/C	0.0173901	0.00989	4.9	759.92	227.75	750.79	709.49	753.6	766.23	740.77	820.1	777.44	831.04	819.47	801.55	722.12	743.15	533.58	749.47	601.86	741.93	746.76	775	989.08	794.25	856.71	810.77	784.45	753.42
1435530_at	Camsap1	calmodulin regulated spectrin-associated protein 1	0.0200477	0.00542	17.47	568.25	95.53	536.65	601.01	578.59	553.37	503.06	450.85	514.54	482.24	583.33	561.27	609.12	641.92	587.85	620.52	587.13	575.22	544.8	541.73	545.57	579.34	559.69	506.52	607.84	584.05
1435532_at	LOC100048362 /// Rimklb	similar to mKIAA1238 protein /// ribosomal modification protein rimK-like family member B	0.0104136	0.00852	18.244	905.17	233.5	975.58	1029.6	966.13	872.48	904.57	843.34	801.23	834.74	919.9	918.13	1046.9	1112.1	1247.13	809.54	944.84	780.12	796.56	907.73	824.17	801.63	856.37	903.93	905.76	936.06
1435553_at	Pdzd2	PDZ domain containing 2	0.0210441	0.00285	14.73	104.15	127.93	151.63	141.43	94.09	123.83	108.42	86.98	149.04	96.34	90.47	99.88	115.74	280.81	333.1	201.17	249.6	137.52	92.61	98.56	78.4	79.38	90.67	77.24	117.62	93.23
1435563_at	Mrps5	mitochondrial ribosomal protein S5	0.0119775	0.00277	16.02	151.79	34.24	147.63	158.23	166.05	161.56	133.5	133.7	133.04	150.88	147.72	163.95	159.69	163.66	201.52	165.08	156.84	163.23	151.87	147.17	133.16	146.94	137.84	138.15	152.22	151.71
1435574_at	---	---	0.000533688	0.00265	20.17	651.2	293.05	713.09	795.13	719.78	760.84	620.55	479.19	583.37	478.21	612.53	556.66	807.43	1064.31	755.37	761.74	666.76	759.71	635.63	611.39	612.27	628.36	574.41	561.55	798.56	873.21
1435577_at	Dab1	disabled homolog 1 (Drosophila)	0.0263618	0.0238	9.61	329.13	131	267.75	319.77	277.21	322.23	321.73	382.41	529.75	406.56	329.9	340.48	325.65	317.07	370.38	323.85	337.48	307.79	358.61	328.36	366.92	381.41	353.77	339.74	323.36	272.7
1435594_at	Atl2	atlastin GTPase 2	0.00028721	0.00181	6.8	426.97	113.63	412.3	389.92	432.86	455.93	434.98	419.35	433.94	463.16	507.19	414.54	411.11	328.3	323.48	363.37	341.69	421.08	451.61	499.18	550.75	524.63	454.68	453.48	407.61	399.68
1435605_at	Actr3b	ARP3 actin-related protein 3 homolog B (yeast)	8.58e-06	0.000129	18.528	598.08	281.05	759.15	695.45	749.15	590.58	466.69	487.02	429.15	493.97	524.68	513.17	669.32	991.25	785.89	737.37	805.26	788.16	605.58	507.16	561.27	551.88	513.48	559.22	616.51	700.59
1435626_a_at	Herpud1	homocysteine-inducible, endoplasmic reticulum stress-inducible, ubiquitin-like domain member 1	0.0143194	0.00115	10.16	548.02	153.68	578.35	490.46	520.04	529.49	547.23	562.99	735.85	579.39	562.03	669.49	598.7	616.62	435.31	428.49	439.87	471.88	449.91	515.03	566.1	533.65	591.82	589.44	548.81	521.02
1435658_at	Slc27a1	solute carrier family 27 (fatty acid transporter), member 1	0.0203792	0.0396	9.53	229.75	92.11	222.68	198.12	194.16	221.73	225.31	270.94	234.18	359.26	264.13	219.98	218.76	181.05	255.4	217.59	199.58	175.04	267.18	252.21	236.19	275.67	262.06	261.95	219.7	241.54
1435674_at	Rhobtb2	Rho-related BTB domain containing 2	0.00848266	0.00245	4.9	164.26	53.56	165.99	162.09	146.62	171.24	182.38	198.01	200.7	209.37	180.16	162.17	137.02	102.25	149.83	129.48	131.15	149.52	193.94	181.38	177.04	152.26	171.16	167.69	157.84	162.52
1435679_at	Optn	optineurin	0.0192771	0.00472	12.8	197.23	99.47	222.54	159.83	196.32	183.73	189.25	221.5	148.66	286.98	290.9	241.56	198.13	104.79	129.1	108.09	91.97	155.78	214.26	224.62	203.36	208.32	250.18	250.44	190.62	182.85
1435682_at	Lars2	leucyl-tRNA synthetase, mitochondrial	1.96e-07	0.000193	19.29	406.28	83.28	475.33	453.42	443.46	433.72	388.19	353.54	354.4	308.77	380	416.14	428.18	458.28	435.59	469.71	459.74	435.6	387.54	367.85	381.93	370.03	360.53	361.2	398.53	414.03
1435684_at	Abcc5	ATP-binding cassette, sub-family C (CFTR/MRP), member 5	0.0166935	0.0226	4.4	679.76	140.49	634.01	634.58	659.83	668.55	664.3	682.5	673.47	669.25	677.02	647.28	684.84	634.94	648.32	762.29	729.5	899.55	789.31	771.18	861.96	766.44	687.94	618.58	683.81	699.42
1435720_at	Kcnd3	potassium voltage-gated channel, Shal-related family, member 3	0.00265504	0.000775	15.34	2074.1	636.23	2190.3	2247.39	2096.39	2195.71	1831.03	1742.34	2067.19	1741.91	1960.41	2026.94	2114.72	3014.38	2750.6	2723.96	2713.05	2358.87	1962.49	2014.55	2081.01	1861.85	1865.77	1905.63	1941.69	2135.49
1435763_at	Tbc1d16	TBC1 domain family, member 16	0.00631755	0.0204	1.98	345.26	188.88	363.59	351.55	337.91	408.6	367.06	348.33	456.06	289.08	253.44	264.39	318.47	455.21	619.59	440.34	521.37	421.58	342.2	290.98	241.84	289.73	269.26	278.45	309.13	355.91
1435787_at	Ppm1l	protein phosphatase 1 (formerly 2C)-like	0.0315783	0.0113	9.56	1461.38	257.42	1402.11	1466.7	1341.43	1506.59	1456.06	1437.02	1807.66	1446.55	1425.81	1488.77	1326.66	1471.84	1411.54	1498.36	1416.84	1590.02	1596.93	1530.63	1744.89	1590.51	1514.32	1299.91	1390.65	1292.82
1435791_x_at	ENSMUSG00000066475 /// ENSMUSG00000067748 /// ENSMUSG00000070510 /// LOC100041933 /// LOC100045527 /// LOC100046300 /// LOC100047874 /// Rpl17	predicted gene, ENSMUSG00000066475 /// predicted gene, ENSMUSG00000067748 /// predicted gene, ENSMUSG00000070510 /// similar to Ribosomal protein L17 /// similar to Rpl17 protein /// similar to Ribosomal protein L17 /// similar to hCG24487 /// ribosomal p	0.0424458	0.0052	5.1	28466.3	1930.66	28684.7	26857.2	27360.4	27873.6	29812.2	29645.5	29440.4	29690.3	29263.8	29448.2	28389.8	26795.7	25950.9	27637.5	27164.8	28162.6	28878.1	28352.2	28184.9	27471.3	29160.7	28542.9	28961.3	28661.4
1435793_at	Aph1b	anterior pharynx defective 1b homolog (C. elegans)	0.00166814	0.0066	18.819	579.92	85.42	681.6	649.06	638.18	623.34	555.26	527.93	601.55	533.99	533.17	593.81	556.85	661.66	648.68	660.03	602.37	697.01	566.03	526.16	599.59	534.56	558.92	533.69	553.46	565.47
1435795_at	Glb1	galactosidase, beta 1	0.0222941	0.00522	19.92	107.66	29.17	121.37	108.98	108.66	117.83	107.87	75.23	92.9	104.71	109.41	123.14	121.91	131.08	133.57	102.48	93.83	97.83	95.16	100.32	106.88	106.17	95.82	109.92	110.5	107.45
1435801_at	Fktn	fukutin	0.00638288	0.0118	20.7	861.62	148.1	874.76	937	911.54	924.92	827.18	808.45	908.52	770.17	828.11	848.49	847.42	997.98	912.31	1003.68	966.01	952.35	829.4	729.55	707.47	902.88	737.9	800.82	836.33	884.15
1435866_s_at	Hist3h2a	histone cluster 3, H2a	0.00326444	0.00417	16.48	576.85	203.21	668.72	603.43	633.66	579.81	548.96	532.34	651.09	568.81	591.43	549.88	642.81	866.31	653.04	643.81	573.69	469.56	491.3	518.87	459.88	513.57	546.16	573.88	636.36	672.44
1435867_at	Jhdm1d	jumonji C domain-containing histone demethylase 1 homolog D (S. cerevisiae)	0.000160925	0.000909	16.12	430.61	191.24	447.36	493.03	451.01	462.54	331.31	339.69	394.94	364.14	431.79	503.01	534.08	713.79	632.22	503.15	496.9	406.53	410.33	375.08	385.7	369.43	429.43	413.95	556.59	424.35
1435894_at	C030014L02	hypothetical protein C030014L02	0.0218561	0.0129	4.5	582.21	147.01	562.27	692.7	587.51	586.17	591.67	575.03	584.27	613.16	603.21	602.5	499.82	444.68	501.26	504.69	541.39	557.32	620.95	640.66	738.7	615.37	580.14	497.27	506.12	504.81
1435912_at	Ubxn7	UBX domain protein 7	0.00490474	0.00355	16.08	499.95	200.74	578.73	553.15	536.72	527.3	454.06	374.97	485.67	435.03	473.26	527.83	645.18	775.56	514.23	557.54	646.45	527.82	438.12	374.08	473.27	412.8	379.71	402.71	601.95	476.76
1435917_at	Ociad2	OCIA domain containing 2	4.03e-05	0.000289	18.266	480.94	275.34	663.67	583.81	536.6	468.38	410.73	444.14	324.76	409.68	426.27	388.21	501.6	875.44	767.78	815.02	738.52	515.92	469.2	478.65	483.22	436.3	404.45	440.05	497.64	660.04
1435940_at	Dclk1	doublecortin-like kinase 1	0.00487994	0.0013	4.5	3660.3	779.24	3599.96	3581.43	3806.65	3690.72	3776.48	3669.51	3679.67	3648.7	3871.75	3651.08	3224.76	2651.74	3312.32	3289.91	3267.62	3683.11	3942.86	4044.16	4210.22	4125.1	3805.17	3550.26	3558.56	3357.81
1435941_at	Rhbdl3	rhomboid, veinlet-like 3 (Drosophila)	0.00108755	0.00136	16.86	258.54	121.63	317.1	280.87	270.71	300.82	257.78	243.12	287.59	240.92	234.86	225.97	251.58	414.85	425.58	368.85	460.9	343.26	259.29	239.45	239.66	238.25	218.2	217.64	257.4	324.71
1435967_s_at	Hibadh	3-hydroxyisobutyrate dehydrogenase	0.0432742	0.00275	20.1	2033.15	274.14	2294.21	2010.43	2135.91	2049.32	1937.99	2010.46	1762.85	1914.81	1912.03	1866.26	2014.72	2050.67	2290.82	2311.12	2145.47	2071.13	2137.44	2002.93	2211.48	2016.97	1948.8	2098.73	1942.02	2244.79
1435970_at	LOC100044468 /// Nlk	similar to nemo-like kinase /// nemo like kinase	0.0310473	0.00377	16.59	2382.97	458.42	2398.32	2455.42	2434.22	2276.93	2249.38	2025.25	2375.2	2204.09	2244.54	2378.85	2409.03	2942.1	2766.68	2692.23	2670.83	2711.15	2307.84	2317.04	2196.12	2546.02	2353.56	2276.78	2601.16	2387.08
1435982_at	Stx12	syntaxin 12	0.00390067	0.0027	18	1189.72	233.06	1214.5	1208.25	1246.04	1295.1	1101.74	1053.08	1263.2	1013.22	1085.81	1096.51	1201.96	1479.33	1332.13	1427.1	1318.46	1330.64	1152.98	1177.49	1118.15	1146.19	1122.05	1064.2	1156.07	1229.36
1436045_at	Tsga10	testis specific 10	0.000620282	0.00142	20.74	291.4	100.11	338.02	312.16	305.62	401.38	225.77	216.33	221.39	201.17	234.36	238.22	324.12	388.78	326.57	316.3	299.55	362.59	287.88	269.37	282.54	248.21	244.23	228.07	294.91	333.72
1423854_a_at	Rasl11b	RAS-like, family 11, member B	1.33e-09	0.000552	8.8	1084.39	4143.71	392.37	524.86	809.43	3217.69	4408.01	5199.12	8612.71	2202.5	903.46	429.93	325.29	803.77	692.7	954.37	1967.77	3758.36	3429.93	3232.93	2783.3	2272.45	1214.41	468.1	339.77	332.9
1436071_at	Ankrd26	ankyrin repeat domain 26	5.17e-06	0.000332	18	379.36	184	410.41	461.42	457.73	421.49	328.45	307.55	340.1	261.05	334.27	356.17	426.93	609.45	589.62	581.74	623.39	480.09	326.77	331.83	255.38	345.85	302.69	301.92	419.27	402.55
1436075_at	Sfrp5	secreted frizzled-related sequence protein 5	3.96e-05	0.000277	14.02	201.92	129.22	258.43	178.51	179.18	133.51	142.61	191.25	161.79	331.39	290.28	309.83	319.53	257.77	240.28	131.36	212.59	72.94	121.39	171.82	140.39	173.24	244.56	324.7	303.07	248.21
1436088_at	Fam49b	family with sequence similarity 49, member B	0.0223952	0.00663	15.97	1953.42	542.41	1866.18	1962.41	2181.65	1944.44	1751.99	1913.07	1878.76	2272.7	2247.4	2231.38	2036.35	1479.92	1644.8	1588.47	1694.43	1505.31	2005.28	2285.34	2564.74	2382.18	2017.21	2018.94	1908.6	1825.48
1436094_at	Vgf	VGF nerve growth factor inducible	6.64e-06	0.0003	8.52	6596.86	4411.88	3928.76	3886.71	3503.34	5774.54	9286.25	10886.9	12327.1	9616.62	9127.64	7072.93	5636.76	7057.83	5457.28	3973.4	4455.57	6302.83	7209.15	7795.22	6853.89	7759.47	8945.64	6283.71	6339.82	5067.06
1436101_at	Rnf24	ring finger protein 24	0.040323	0.0365	9.87	377.51	64.12	355.09	344.92	377.51	413.08	377.51	364.19	348.15	448.05	406.53	393.82	420.26	321.74	352.44	346.35	359.64	339.1	375.38	404.29	449.98	434.18	398.63	372.22	397.01	377.61
1436103_at	Rab3ip	RAB3A interacting protein	0.00635488	0.00317	16.91	195.91	88.32	203.62	199.93	204.7	195.45	149.16	128.9	173.14	149.33	179.21	168.6	223.67	305.53	218.36	200.79	230.99	205.49	189.83	145.89	196.37	161.1	167.03	147.8	197.04	210.73
1436117_at	A830010M20Rik	RIKEN cDNA A830010M20 gene	0.0474269	0.000462	14.11	1409.39	456.19	1528.26	1498.32	1388.43	1337.7	1132.59	1253.56	1686.53	1338.87	1349.72	1423.4	1629.48	2044.97	1979.6	1872.74	1954.11	1647.07	1395.38	1181.16	1350.04	1340.54	1321.61	1237.41	1502.41	1466.08
1436135_at	2900075N08Rik	RIKEN cDNA 2900075N08 gene	0.0163124	0.00704	5	581.93	116.7	566.03	584.25	577.77	601.09	600.15	584.2	530.77	584.18	601.02	643.02	536.77	456.68	508.8	518.84	561.03	562.54	579.69	666.29	681.75	690.09	630.51	592.33	533.92	499.05
1436156_at	Ccar1	cell division cycle and apoptosis regulator 1	2.43e-05	0.000243	16.13	1580.87	490	1733.03	1603.68	1487.78	1570.89	1564.98	1282.37	1485.72	1405.59	1590.86	1549.63	2068.49	2262.37	2075.15	1804.2	1746.94	1661.58	1495.66	1404.98	1333.84	1490.06	1520.72	1591.08	1903.35	1835
1436157_at	Ccar1	cell division cycle and apoptosis regulator 1	0.00451842	0.00573	16.7	3695.31	1289.24	3959.5	3770.06	3606.45	3909.86	3611.33	3330.08	4027.01	3284.99	3451.14	3664.1	4408.38	5433.38	3726.53	4291.73	3931.27	3824.74	3366.52	2921.89	2854.9	3388.68	3460.29	3430.55	4161.49	4224.07
1436161_at	Pds5b	PDS5, regulator of cohesion maintenance, homolog B (S. cerevisiae)	0.0085773	0.00948	22.43	2651.19	420.96	2849.93	2871.32	2933.43	3040.65	2627.6	2289.11	2351.42	2331.35	2409.9	2287.38	2530.01	2868.55	2674.79	2861.14	2548.03	2715.52	2776.17	2581.67	2739.63	2624.3	2572.22	2198.72	2733.62	2733.77
1436164_at	Slc30a1	solute carrier family 30 (zinc transporter), member 1	4.36e-05	0.000715	9.11	1177.6	275.89	1027.15	1162.23	1161.93	1192.98	1128.53	1240.24	1459.36	1398.45	1272.61	1131.61	979.13	1102.93	927.72	1147.46	1242.84	1242.43	1273.77	1296.03	1477.39	1262.1	1248.78	1157.65	925.6	957.77
1436200_at	Lonrf3	LON peptidase N-terminal domain and ring finger 3	0.0266286	0.00964	9.9	678.01	264.58	629.2	608.3	586.61	616.6	508.74	607.17	810.11	799.39	655.64	735.13	791.07	1037.9	858	711.91	720.41	532.95	537.91	552.1	760.21	648.95	709.9	656.63	857.06	699.4
1436205_at	---	---	0.00541627	0.00745	3.63	308.58	82.48	306.02	305.65	293.97	349.19	334.43	310.57	339.53	301.65	297.08	275.96	215.57	260.1	314.07	344.56	361.81	330.75	306.59	324.19	380.53	314.24	315.59	271	270.92	280.06
1436209_at	Dnajc16	DnaJ (Hsp40) homolog, subfamily C, member 16	0.00261162	0.00312	10.11	214.11	43.8	197.37	202.81	214.1	222.51	215.13	231.64	258.39	241.19	246.49	238.08	202.73	204.6	193.54	214.12	222.12	198.56	203.58	209.5	281.15	245.18	213.9	215.51	196.82	195.96
1436228_at	Ctbp2 /// Zranb1	C-terminal binding protein 2 /// zinc finger, RAN-binding domain containing 1	0.000719813	0.00101	11.18	372.71	67.81	355.33	336.79	365.39	357.98	342.88	418.26	469.38	449.31	389.21	384.87	337.5	367.33	377.59	368.89	368.06	371.16	399.42	406.92	428.78	444.43	385.11	374.26	333.76	356.59
1436242_a_at	Cklf	chemokine-like factor	0.0058101	0.00984	18.492	169.68	71.26	169.94	186.89	182.15	180.16	138.18	135.14	142.58	172.38	152.9	157.39	216.66	276.43	155.93	220.09	195.76	169.42	161.51	133.91	165.87	158.65	185.39	164.22	214.54	213.72
1436274_at	Mrap2	melanocortin 2 receptor accessory protein 2	0.0198456	0.00973	5.6	880.45	312.76	903.17	841.53	851.59	960.74	1002.68	960.98	958.19	866.27	915.13	904.92	837.47	543.31	680.44	799.42	705.15	919.74	1168.83	1059.96	846.86	894.62	826.37	915.61	708.91	842.49
1436299_at	Gls	glutaminase	0.00661853	0.00201	14.8	458.92	327.72	473.33	501.76	442.71	524.83	396.98	334.26	532.56	400.09	444.51	397.68	551.37	974.23	730.78	744.9	718.29	595.15	394.05	360.3	318.79	407.38	395.14	384.17	498.68	495.61
1436303_at	Mllt4	myeloid/lymphoid or mixed-lineage leukemia (trithorax homolog, Drosophila); translocated to, 4	0.0269029	0.0022	18	870.54	298.43	879.98	906.54	793.52	1002.71	797.4	707.74	891.56	698.45	722.73	709.16	804.33	1020.69	1295.32	1193.75	1053.81	1081.33	1014.92	862.31	856.77	841.64	835.96	775.89	972.31	878.77
1436316_at	9430029L20Rik	RIKEN cDNA 9430029L20 gene	0.0137382	0.0106	15.16	448.69	69.59	453.74	464.72	460.53	442.97	423.4	440.62	471.27	442.34	460.14	521.87	470.89	453.56	420.66	425.27	399.49	408.66	382.7	401.87	496.04	433.82	443.83	495.63	506.07	486.08
1436338_at	---	---	0.000737929	0.000889	5.2	711.52	140.56	671.06	704.93	740.38	780.07	684.94	722.77	726.56	777.91	718.12	679.21	655.58	571.75	586.41	625.43	646.95	798.73	852.87	750.24	797.11	754.17	735.15	682.48	685.66	647.54
1436353_at	A230046K03Rik	RIKEN cDNA A230046K03 gene	0.000264435	0.00135	19.45	489.25	162.39	518.15	581.49	542.14	511.61	458.85	393.25	391.51	410.81	473.96	526.48	570.1	637.97	536.27	480.52	562.17	481.32	497.17	471.72	313.19	460.19	468.51	454.91	544.98	543.13
1436363_a_at	Nfix	nuclear factor I/X	0.0261824	0.00266	6.6	2283.58	528.01	1908.73	2338.84	2135.33	2381.01	2434.22	2404.34	2000.28	2625.09	2412.04	2564.66	2004.5	1776.34	1569.07	1769.15	1659.19	2197.78	2352.29	2443.77	2515.57	2270.17	2562.51	2284.97	2231.4	2282.2
1436376_s_at	Srbd1	S1 RNA binding domain 1	0.0201758	0.00704	16.25	115.88	41.92	113.58	123.15	118.85	121.56	121.44	101.23	116.82	109.57	104.23	89.36	114.68	173.21	167.46	148.52	167.84	124.71	102.47	121.15	114.94	96.32	102.25	101.29	107.14	118.86
1436380_at	Cdc42bpa	CDC42 binding protein kinase alpha	0.00107789	0.000566	19.1	199.29	52.13	223.12	214.25	216.62	199.54	182.37	154.32	164.41	159.31	162.36	173.16	172.63	258.59	225.8	256.01	222.41	213.94	200.43	195.07	209.17	199.03	162.68	156.72	200.86	194.94
1436393_a_at	Trim37	tripartite motif-containing 37	0.000738511	0.000718	12.41	467.64	147.74	435.21	468.76	441.58	404.8	440.42	507.82	700.28	600.82	507.27	545.93	433.43	445.81	423.29	440.08	498.45	466.51	531.84	512.85	543.02	626.04	515.31	461.47	422.68	425.34
1436394_at	Trim37	tripartite motif-containing 37	0.00121826	0.00598	9.91	455.15	189.63	363.87	438.78	405.81	360.93	428.76	478.6	706.53	530.98	468.36	481.16	372.87	426.13	327.27	448.34	466.87	436.87	461.96	474.99	552.27	568.96	523.86	479.02	405.98	422.41
1436404_at	Tlcd1	TLC domain containing 1	0.0139012	0.0142	13.63	407.74	106.31	411.7	415.65	407.92	387.3	397.21	373.01	399.97	513.64	457.19	435.83	473.2	374.42	324.91	301.03	396.4	338.87	407.57	403.36	383.12	460.43	488.73	450.66	443.74	436.51
1436459_at	---	---	0.0152821	0.00663	22.2	216.38	41.93	246.95	261.6	226	224.14	207.47	197.16	196.73	192.66	177.75	217.09	217.63	206.88	208.34	244.93	239.8	230.11	186.6	201.11	213.86	215.67	213.96	227.3	238.51	224
1436463_at	---	---	5.64e-05	0.000466	20.24	417.54	103.39	455.89	456.49	454.9	460.06	396.5	323.37	372.84	322.59	376.2	401.91	441.73	510.9	462.83	529.37	458.64	527.84	342.83	394.33	398.48	354.65	400.54	367.39	433.17	460.2
1436470_at	Rims2	regulating synaptic membrane exocytosis 2	0.025334	0.0113	18	1905.1	237.94	1976.45	2000.94	1944.44	2045.92	1861.43	1765.21	1782.08	1847.64	1811.52	1934.93	2014.32	2184.43	1796.69	2098.48	2039.66	1980.59	1901.69	1734.43	1908.5	1803.44	1831.94	1708.55	1804.96	1976.11
1436484_at	C030019I05Rik	RIKEN cDNA C030019I05 gene	0.000617665	0.00132	9.22	274	200.94	187.91	217.54	197.47	253.18	295.31	316.8	570.61	437.14	426.01	326.92	244.96	286.48	173.47	168.73	206.59	294.43	273.51	274.49	219.22	311.1	342.69	275.2	232.77	247.77
1436501_at	Mtus1	mitochondrial tumor suppressor 1	0.000183563	0.00122	19.55	301.36	114.11	320.97	325.35	311.5	312.65	264.76	259.34	271.05	282.5	243.01	247.43	299.11	308.16	471.23	383.29	364.47	334.05	307.22	261.19	284.91	251.21	266.74	288.1	303.6	332.34
1436506_a_at	Snhg6	small nucleolar RNA host gene (non-protein coding) 6	0.00149735	0.000907	6.6	2233.05	463.34	2153.63	2092.72	2011.87	2195.26	2420.03	2723.88	2150.95	2764.31	2716.51	2485.1	2267.06	1837.63	1879.89	1841.61	1893.54	1943.72	2370.49	2482.95	2221.54	2222.08	2490.9	2462.49	2390.35	2244.02
1436509_at	Mlec	malectin	0.0181803	0.0018	15.11	317.22	125.9	401.32	344.01	296.31	304.01	294.19	266.88	378.93	276.62	303.57	317.18	360.03	516.31	448.78	399.1	351.54	401.81	325.16	287.26	314.85	264.51	291.17	273.42	317.27	371.23
1436513_at	Tanc2	tetratricopeptide repeat, ankyrin repeat and coiled-coil containing 2	0.00976202	0.000912	7.2	741.47	189.07	679.73	770.85	648.21	801.45	952.48	950.46	978.67	970.27	906.02	904.36	740.97	652.53	700.05	612.87	600.53	633.77	776.53	741.97	774.12	708.05	938.15	662.5	738.45	631.54
1436515_at	Bach2	BTB and CNC homology 2	0.00113405	0.000749	6.7	189.3	77.44	163.4	199.58	192.3	200.76	231.13	235.39	186.31	255.4	219.94	182.44	165.9	140.45	100.52	124.56	128.6	193.77	204.58	246.41	215.04	244.05	173.16	183.95	164.37	164.25
1436529_at	Gpr123	G protein-coupled receptor 123	0.000618262	0.00334	4.8	516.64	92.89	592.58	474.84	483.66	588.7	565.75	589.09	572.05	522.22	487.11	456.22	459.22	426.93	479.09	469.17	511.06	576.95	578.32	561	612.7	541.19	502.68	482	440.72	522.22
1436531_at	Metap2	methionine aminopeptidase 2	0.000550109	0.00127	10.38	1212.15	316.19	1002.48	1188.31	1073.89	1144.33	1161.2	1369.51	1465.12	1280.67	1367.78	1295.22	1123.31	1140.05	832.75	1100.33	1399.1	1213.98	1293.31	1309.73	1371.4	1332.2	1330.15	1210.32	1116.99	1025.03
1436545_at	Dtx4	deltex 4 homolog (Drosophila)	0.00440433	0.0108	1.92	938.82	200.66	961.12	947.48	980.42	1055.21	1061.13	1071.74	755.72	868.5	837.34	776.66	867.75	890.58	1058.14	1063.05	913.45	1059.13	1018.18	930.15	1157.04	802.89	812.71	781.22	879.71	959.49
1436566_at	Rab40b	Rab40b, member RAS oncogene family	0.00130424	0.00111	14.81	859.85	918.95	1017.22	1097.99	900.45	824.8	770.8	724.83	987.16	774.46	821.58	814.63	1142.95	2299.77	1771.01	1568.1	1894.04	985.64	707.96	595.95	461.87	652.95	711.69	669.53	894.89	996.33
1436595_at	Rbm34	RNA binding motif protein 34	0.00600562	0.00341	14.92	586.15	159.72	592.56	529.93	594.39	559.01	530.45	569.94	579.75	680.64	708.04	637.85	546.08	464.53	518.62	514.11	608.86	516.26	593.2	690.65	783.98	694.78	618.33	626.5	545.63	527.81
1436606_at	Zfp498	Zinc finger protein 498, mRNA (cDNA clone MGC:183789 IMAGE:9087789)	0.0165357	0.00632	13.91	441.5	70.7	428.98	422.11	402.07	490.03	401.41	440.94	469.66	487.79	488.77	512.73	442.07	414.1	431.44	424.72	432.97	371.33	464.21	490.51	507.11	495.37	460.07	489.26	398.41	436.76
1436610_at	Ankrd12	ankyrin repeat domain 12	0.0219342	0.0141	10.62	201.42	69.29	147.53	171.25	192.86	174.22	216.11	199.28	286.11	219.6	225.96	199.32	175.25	210.95	177.44	216.26	233.78	192.17	216.06	217.67	259.84	227.58	203.52	164.6	181.88	167.36
1436616_at	Inpp4a	inositol polyphosphate-4-phosphatase, type I	0.0174872	0.00871	16.94	1579.39	319.17	1788.35	1595.86	1503.17	1471.6	1349.06	1441.03	1677.02	1471.76	1434.64	1538.45	1614.55	1946.65	1987.4	1935.43	1638.44	1562.91	1483.19	1409.34	1733.51	1521.47	1601.66	1483.78	1773.98	1770.94
1436669_at	1700019G17Rik	RIKEN cDNA 1700019G17 gene	0.0132202	0.00578	7.3	426.91	108.71	365.3	393.5	452.72	470.4	432.8	447.07	406.88	556.98	477.66	414.66	392.62	351.61	402.43	343.71	339.57	394.67	423.82	479.7	442.47	469.94	468.09	430	386.22	444.63
1436670_x_at	1700019G17Rik	RIKEN cDNA 1700019G17 gene	0.00442194	0.00525	7	293.55	81.2	210.56	234.93	281.45	333.83	303.49	291.43	285.39	372.95	329.4	288.17	246.78	263.99	272.34	254.72	240.55	295.67	345.74	354.34	330.02	301.01	331.97	322.36	245.53	305.41
1436722_a_at	Actb	actin, beta	0.00456535	0.0021	18.768	19285.8	3850.05	21404.6	19416.1	19270	19098.4	18537	18106.8	15938	17478.1	17882.4	19055.6	19301.5	23135.5	23638.1	21686.1	19184.4	19889.6	18896	18842.1	20191.8	19773.9	19125	19563.1	19914.8	20883.5
1436724_a_at	Lgtn	ligatin	0.000168727	0.00467	13.86	436.29	86.23	416.39	416.79	364.65	369.61	393.3	419.59	499.1	478.93	467.95	465.48	438.38	441.27	348	369.27	380.33	451.63	434.19	409	520.46	505.58	439.4	491.52	467.58	420.14
1436735_at	Nsun3	NOL1/NOP2/Sun domain family member 3	0.0357846	0.0259	6.4	318.85	111.97	301.94	350.97	383.79	366.49	351.87	311.94	324.89	396.49	393.95	319.5	269.88	266.28	237.32	268.59	318.19	299.58	297.77	436.74	326.69	365.86	310.65	331.57	231.81	212.8
1436763_a_at	2310051E17Rik /// Klf9	RIKEN cDNA 2310051E17 gene /// Kruppel-like factor 9	0.0376448	0.00439	10.83	516.72	234.06	509.84	578.01	413.02	434.36	490.7	706.1	549.83	776.21	702.41	810.09	584	411.67	743.04	373.32	406.34	341.98	435.18	506.51	523.6	409.72	627.36	761.03	579.97	470.86
1436791_at	Wnt5a	wingless-related MMTV integration site 5A	8.27e-05	0.00296	8.16	281.93	303.48	232.05	199.91	195.36	304.8	389.66	504.71	768.26	462.61	340.69	280.8	181.29	267.64	161.3	190.2	261.09	283.07	277.71	313.52	303.32	323.81	300.71	287.33	168.97	178.58
1436797_a_at	Surf4	surfeit gene 4	0.00456233	0.00188	11.91	200.78	34.85	212.74	198.35	162.48	183.42	175.89	181.86	218.04	223.95	219.97	211.31	225.49	232.19	203.21	212.33	183.78	172.86	203.51	179.01	176.64	187.09	193.09	225.25	211.32	197.75
1436856_x_at	Tars2	threonyl-tRNA synthetase 2, mitochondrial (putative)	0.00846931	0.0036	22.47	137.73	35.94	165.12	123.49	144.55	144.36	139.89	115.55	101.57	109.09	119.18	113.29	131.39	149.21	145.41	137.3	141.31	173.44	148.42	125.7	112.36	138.16	115.31	125.62	156.59	160.38
1436860_at	Senp7	SUMO1/sentrin specific peptidase 7	0.0461548	0.0354	17.416	670.27	238.75	818.72	734.83	698.28	749.54	667.16	673.39	777.63	574.57	646.06	657.86	606.36	630.81	1052.07	908.99	842.34	766.18	684.96	624.19	691.04	642.46	638.26	577.68	641.31	624.2
1436869_at	Shh	sonic hedgehog	0.000185938	0.000418	16.63	1277.95	547.44	1703.37	1413.61	1456.6	1282.48	1070.63	1141.42	1273.43	1186.75	1217.61	1269.12	1546.4	2145.81	1749.81	1802.18	1851.6	1407.17	1118.73	1050.93	1244.84	1257.85	1217.69	1084.57	1490.56	1451.46
1436893_a_at	39879	membrane-associated ring finger (C3HC4) 7	0.0222026	0.0149	9.64	573.87	215.08	505.72	578.26	514.06	603.78	527.64	658.65	817.44	581.04	658.54	538.46	464.23	552.46	549.12	570.04	555.81	587.28	589.93	590.72	617.16	614.7	562.92	577.71	392.73	387.27
1436947_a_at	Txnl1	thioredoxin-like 1	0.00123257	0.00327	20.93	4659.71	543.73	5284.28	4671.54	5063.78	4810.31	4483.32	4283.09	4508.39	4354.94	4361.73	4196.82	4767.1	4750.92	5219.19	5059.68	4596.03	5097.07	4588.24	4541.11	4327.89	4786.47	4442.35	4647.88	4692.06	4913.74
1436959_x_at	Nelf	nasal embryonic LHRH factor	0.000830563	0.00215	15.6	26406	13081.3	29685.5	32220.7	26983.1	28132.2	25213	26408.2	33741.1	21398.6	21415.5	22636.8	26236.3	40398.1	38757.2	40911.6	44542.3	38293.1	29277.6	23189.8	18379.8	22079.1	21002	19375.5	24748.7	26404
1436979_x_at	Rbm14	RNA binding motif protein 14	0.00726976	0.00386	17.734	1214.95	371.55	1300.03	1226.86	1202.4	1348.01	1037.75	1084.28	1200.49	1050.93	1009.5	1131.21	1372.12	1752.61	1497.48	1407.39	1295.36	1426.53	1203.05	1067.18	1256.95	1175.15	1116.13	1171.38	1293.82	1400.32
1436994_a_at	Hist1h1c	histone cluster 1, H1c	0.0103127	0.00783	9.88	1700.14	576.79	1410.34	1532.51	1490.33	1729.5	1694.77	1851.54	1705.5	2189.98	2489.67	1819.95	1740.11	1740.19	1336.09	1342.34	1581.3	1505.05	1597.71	2079.27	1433.03	1743.94	1882.73	2153.24	1600.28	1564.21
1436999_at	5033414K04Rik	RIKEN cDNA 5033414K04 gene	2.59e-06	0.000372	16.66	1576.04	427.81	1795.06	1674.68	1685.63	1648.5	1313.59	1411.65	1259.57	1452.45	1507.54	1597.54	1954.57	2115.2	2062.55	1661.48	1817.22	1554.53	1510.94	1385.23	1292.98	1263.83	1383.99	1516.09	1677.99	1601.81
1437017_at	AI480653 /// LOC100047112	expressed sequence AI480653 /// similar to Expressed sequence AI480653	0.00110648	0.00182	16.9	118.37	63.14	151.33	133.37	147.45	118.98	111.97	92.25	114.82	79.2	119.96	106.86	130.21	205.48	180.01	149.39	153.73	121.45	96.09	117.76	92.65	108.24	105.52	91.66	98.05	123.03
1437043_a_at	Fam125a	family with sequence similarity 125, member A	0.000763743	0.0045	8.02	190.96	59.33	184.39	153.93	163.37	168.35	180.97	217.45	188.88	251.62	210.32	213.1	184.58	132.97	165.24	165.9	139.54	174.12	204.72	193.04	197.23	214.11	207.12	227.93	197.84	208.59
1437067_at	Phtf2	putative homeodomain transcription factor 2	0.00375588	0.00115	17.729	343.24	117.72	346.12	346.33	373.84	340.36	274.59	245.79	311.22	324.03	287.91	308.14	358.19	472.78	433.08	480.78	481.24	431.04	309.42	308.23	258.03	348.85	334.83	328.52	387.63	352.01
1437070_at	Cdc14b	CDC14 cell division cycle 14 homolog B (S. cerevisiae)	1.24e-05	0.000129	9.08	314.24	80.9	282.59	301.86	303.52	312.8	342.92	368.65	414.67	410.37	370.74	357.14	323.79	289.88	252.87	281.14	276.88	311.8	335.87	351.45	315.68	330.45	359.63	309.31	308.39	296.33
1437100_x_at	Pim3	proviral integration site 3	0.0136829	0.0124	6.8	1110.62	369.49	1054.76	1096.43	1141.44	1077.47	1029.22	1177.31	1023.46	1157.51	1235.59	1269.34	1124.82	936.27	699.7	930.53	904.47	940.98	1020.8	1134.09	1438.68	1248.66	1260.57	1383.51	1126.76	1076.14
1437108_at	Lsm6	LSM6 homolog, U6 small nuclear RNA associated (S. cerevisiae)	0.0195975	0.00149	16.57	515.94	102	512.87	508.32	537.71	515.56	531.29	457.28	447	513.64	494.94	515.66	521.42	565.44	651.01	590.06	571.68	569.65	502.68	517.56	492.28	518.88	492.04	510.41	516.23	523.02
1437115_at	Phrf1	PHD and ring finger domains 1	0.0285398	0.00258	14.9	264.18	66.56	275.78	271.44	254.57	263.98	230.3	240.01	267	251.32	264.38	263.69	286.34	323.06	359.35	286.23	278.31	255.47	269.64	238.05	226.22	242.05	274.56	227.13	296.45	256.24
1437124_at	A630052C17Rik	RIKEN cDNA A630052C17 gene	0.00637473	0.00457	16.33	140	59.44	145.22	150.77	160.53	134.93	130.64	111.29	143.09	127.64	119.32	133	147.24	230.17	194.48	163.98	161.28	168.78	127.32	115.7	122.88	145.11	126.13	124.02	136.9	149.43
1437190_at	Styk1	serine/threonine/tyrosine kinase 1	0.0176025	0.0132	10.19	131.34	132.09	77.86	80.18	84.31	109.88	158.88	208.63	327.08	166.5	140.01	128.13	109.35	128.21	137.11	125.36	149.27	189.51	165.54	134.47	112.54	168.04	173.5	102.57	109.96	62.9
1437204_a_at	Tcf25	transcription factor 25 (basic helix-loop-helix)	0.000824676	0.0112	10.54	179.61	56.69	117.02	120.02	108.75	106.14	179.16	208.49	197.66	199.91	179.23	191.25	167.81	118.81	173.35	148.45	165.1	180	214.22	199.14	218.3	208.59	219.51	202.58	181	159.37
1437205_at	Tcf25	transcription factor 25 (basic helix-loop-helix)	0.00771132	0.0121	9.15	211.75	83.2	118.82	129.97	135.5	148.85	201.84	216.17	285.23	214.64	193.84	202.88	161.02	127.38	200.72	219.48	208.86	215.76	268.91	236.94	230.54	261.82	257.82	215.52	220.25	163.57
1437223_s_at	Xbp1	X-box binding protein 1	0.00326949	0.011	13.71	9131.5	1686.53	9315.78	8636.04	8192.96	8719.84	8321.29	8416.25	9899.54	8687.24	9376.99	9392.32	10311.2	11566	9211.41	9787.74	8616.36	8977.58	8513.27	8486.55	8503.36	9647.49	9887.18	9051.6	10133.9	9931.43
1437247_at	Fosl2 /// LOC634417	fos-like antigen 2 /// similar to fos-like antigen 2	0.000465399	0.00343	8.41	232.45	599.07	126.99	147.25	143.33	1000.2	1008.02	605.29	1072.85	267.34	171.01	133.05	176.01	229.99	159.95	161.93	234.91	1311.55	774.31	474.19	239.37	303.8	189.6	113.42	246.7	171.08
1437261_at	2900024O10Rik	RIKEN cDNA 2900024O10 gene	0.00607363	0.00433	18	1014.52	223.12	1015.39	1147.54	1090.62	1044.91	951.72	791.04	879.96	943.54	1008.6	988.1	1033.03	1237.28	1171.42	1080.85	1042.29	1070.57	983.53	992.12	993.41	1025.07	987.51	900.53	1013.65	1058.28
1437265_at	5330438D12Rik	RIKEN cDNA 5330438D12 gene	0.00413918	0.00305	19.39	173.35	27.41	192.01	168.13	187.97	161.99	157.44	162.99	138.5	155.03	184.68	176.12	188.25	172.54	183.62	185.25	176.99	162.8	160.94	174.16	152.13	165.13	166.09	193.32	174.72	177.11
1437284_at	Fzd1	frizzled homolog 1 (Drosophila)	0.00223233	0.00239	17.55	400.35	129.7	433.78	401.76	405.9	390.73	326.41	326.87	292.7	407.21	408.59	491.4	463.87	401.83	391.69	239.39	301.02	248.88	311.1	290.98	398.95	346.59	403.83	475.48	498.8	489.52
1437290_at	Impad1	inositol monophosphatase domain containing 1	0.0141186	0.00451	15.05	2223.07	371.94	2234.8	2370.02	2398.69	2248.8	2077.83	2014.43	2180.55	2190.22	2335.81	2445.92	2477.77	2703.02	2501.59	2215.26	2340.86	1959.14	2030.49	2207.91	2141.61	2115.52	2191.81	2120.84	2230.88	2267.18
1437291_at	2700081O15Rik	RIKEN cDNA 2700081O15 gene	0.00373393	0.000205	15.62	119.4	68.9	118.62	142.72	123.55	140.16	92.72	72.99	112.97	96.34	120.19	98.36	139.6	183.31	210.8	190.13	190.49	161.2	136.96	111.47	116.64	106.57	90.09	89.55	115.21	136.59
1437312_at	Bmpr1b	bone morphogenetic protein receptor, type 1B	0.00564527	0.00312	19.64	413.25	115.69	423.4	492.61	468.64	540.75	373.12	325.33	384.4	427.75	348.41	357.19	384	534.47	486.36	556.71	529.5	478.5	408.21	446.31	409.61	416.88	377.89	358.47	405.91	407.59
1437334_x_at	Parn	poly(A)-specific ribonuclease (deadenylation nuclease)	0.00730788	0.00662	15.9	176.95	43.05	173.19	177.79	169.97	175.89	168.32	162.24	164.36	209.82	211.62	198.61	183.62	155.35	170.35	174.6	176.11	142.44	181.06	195.13	194.21	228.54	212.78	204.02	183.03	167.02
1437350_at	RP23-143A14.5	candidate tumor suppressor in ovarian cancer 2	0.000191705	0.000891	18	129.95	73.25	211.28	177.38	159.13	122.17	83.78	102.35	128.08	119.67	123.2	131.82	132.41	230.29	164.18	206.03	201.92	150.06	123.5	100.3	119.29	110.24	120.53	111.93	168.57	135.82
1437351_at	Cxxc4	CXXC finger 4	0.0407026	0.00514	19.2	1965.2	448.64	2057.64	2205.61	1887.31	1927.76	2040.39	1809.35	2027.71	1604.12	1661.06	1639.95	1679.38	2306.06	1847.18	2501.4	2455.84	2257.99	2039	1980.45	2213.29	1994	1888.46	1787.53	1733.44	1949.95
1437418_at	100041799	predicted gene, 100041799	0.0133469	0.00114	16.55	534.77	498.66	574.92	528.36	540.98	469.83	471.08	457.8	473.17	364.67	411.95	467.6	587.31	813.96	1361.99	1344.02	1334.24	877.03	656.48	528.55	546.15	519.69	466.02	496.6	745.6	728.21
1437419_at	Bmp2k	BMP2 inducible kinase	0.00442529	0.000243	6.8	267.8	114.42	229.35	251.58	267.09	303.9	268.52	281.83	279.75	318.48	303.44	287.66	243.95	136.02	89.63	142.39	161.47	194.31	285.81	300.36	315.71	293.51	280.71	262.73	237.77	200.35
1437449_at	Rsad1	radical S-adenosyl methionine domain containing 1	1.35e-05	0.000236	8.57	534.11	211.66	497.48	400.95	438.11	523.6	634.89	713.5	797.36	548.85	570.7	532.28	451.17	374.04	535.94	484.82	516.27	567.5	642.36	650.1	588.74	642.67	605.58	495.96	418.7	435.24
1437461_s_at	Rnpc3	RNA-binding region (RNP1, RRM) containing 3	0.0182436	0.00224	14.32	718.04	324.01	627.33	725.97	811.97	705.47	715.1	634.91	692.84	642.52	709.11	859.5	1031.58	1115.42	971.1	760.66	973.73	846.28	669.02	696.48	467.4	684.48	616.78	720.97	974.09	853.15
1437476_at	Rrm2b	ribonucleotide reductase M2 B (TP53 inducible)	0.00300859	0.0131	20.32	341.28	108.52	375.78	480.67	424.76	452.56	331.92	266.29	263.63	280.55	357.16	311.19	355.27	380.93	455.26	388.34	432.4	366.8	292.22	350.63	287.64	323.35	321.63	321.93	273.84	290.86
1437497_a_at	Hsp90aa1	heat shock protein 90, alpha (cytosolic), class A member 1	8.8e-05	0.0127	0.67	18746.9	3171.49	21052.2	20173	20170.8	19185.5	21211.8	19652	19264.2	16486.1	16587.4	17006.5	18548.2	20687.8	21346.3	21555.2	18749.4	19596.3	18107.1	17213.9	15742.9	15212.2	16814.5	16904.6	17559.1	18744.3
1437553_at	Brcc3	BRCA1/BRCA2-containing complex, subunit 3	0.0116074	0.00655	10.59	199.61	61.01	175.36	183.73	172.88	172.51	200.53	225.57	273.14	205.47	225.37	258.83	225	192.87	151.13	152.19	230.27	172.43	179.2	219.82	191.04	232.03	208.01	205.42	198.69	193.75
1437558_at	B130021B11Rik	RIKEN cDNA B130021B11 gene	0.0180045	0.0137	17.247	113.38	72.29	168.7	140.13	134.29	139.36	103.57	103.56	80.95	137.27	133.61	109.27	156.1	225.54	147.01	112.91	112.1	98.79	104.71	110.37	113.85	99.92	101.39	109.83	117.14	142.85
1437563_at	Phf20l1	PHD finger protein 20-like 1	0.00779378	0.0286	12.44	233.5	76.44	160.21	187.41	195.43	200.3	211.41	211.95	313.08	264.04	231.83	267.76	238.63	229.73	266.58	230.13	249.03	279.47	268.46	235.18	274.09	248.39	240.47	187.26	208.22	182.09
1437565_a_at	Gnl2 /// LOC633966	guanine nucleotide binding protein-like 2 (nucleolar) /// similar to guanine nucleotide binding protein-like 2 (nucleolar)	0.0407697	0.035	6.3	724.01	135.63	565.78	683.83	657.6	623.18	713.56	733.11	745.36	781.7	791.69	750.64	770.05	655.32	537.39	616.6	786.18	652.8	706.39	726.25	667.06	766.33	741.46	743.41	808.66	721.78
1437618_x_at	Gpr85	G protein-coupled receptor 85	0.0419731	0.038	18.75	1929.68	347.78	2027.04	2113.55	2238.22	1953.21	2007.48	1811.97	1854.58	1792.23	1938.14	2025.78	2218.18	2424.76	1902.63	1869.36	2345.6	1945.89	1787.9	1890.17	1729.19	1875.91	1815.64	1881.76	1921.23	2006.83
1437626_at	Zfp36l2	zinc finger protein 36, C3H type-like 2	0.00285571	0.00113	3.31	1557.13	517.86	1411.89	1583.23	1542.64	2060.53	1752.28	1715.87	1487.23	1606.48	1271.4	1024.81	1476.54	1546.55	1482.47	1591.35	1442.41	1866.41	1920.92	1925.01	1958.41	1579.74	1437.71	1236.03	1509.96	1567.7
1437642_at	Agfg2	ArfGAP with FG repeats 2	0.0114709	0.00998	19.39	194.38	53.67	254.12	189.8	191.73	202.4	193.52	146.79	147.92	202.8	204.56	180.68	204.97	209.22	219.89	196.87	232.84	172.64	158.5	177.2	175.49	191.84	186.61	222.02	195.25	210.6
1437666_x_at	Gm1821 /// LOC100048105 /// Rps27a /// Ubb /// Ubc	gene model 1821, (NCBI) /// similar to Ubc protein /// ribosomal protein S27a /// ubiquitin B /// ubiquitin C	0.0226675	0.01	5.8	25437.6	2853.23	23495.8	24167	25130.5	24716.7	25530.9	26400.5	28967.3	25326.2	23712.2	24730	23799.4	25107.8	23767.8	25344.8	25087.8	27432.2	26648.1	26162.4	29202.3	27668	26667.3	25830.7	25530.3	26099.4
1437704_at	2900024O10Rik	RIKEN cDNA 2900024O10 gene	0.00437909	0.0142	16.79	1232.37	221.37	1289.31	1251.87	1217.83	1190.05	1192.71	1038.84	1044.81	1210.94	1316.33	1481.59	1321.86	1324.74	1235.21	1209.63	1125.66	1256.28	1204.55	1088.31	1238.31	1152.53	1270.48	1229.52	1280.03	1343.69
1437711_x_at	EG627245 /// EG665017 /// EG666231 /// EG668343 /// Odc1	predicted gene, EG627245 /// predicted gene, EG665017 /// predicted gene, EG666231 /// predicted gene, EG668343 /// ornithine decarboxylase, structural 1	0.000761766	0.00263	7.7	5260.23	1830.95	3930.16	4888.92	4914.4	5430.24	6905.74	6731	7344.72	6094.16	6119.73	5358.39	4828.4	4363.72	3683.84	3682.82	5386.73	5291.01	5603.19	6037.81	4089.16	5645.32	5229.45	4739.07	4238.22	4233.26
1437716_x_at	Kif22	kinesin family member 22	4.28e-05	0.000518	10.01	398.64	151.89	324.82	337.21	360.57	339.01	422.22	594.44	464.16	524.24	552.02	525.22	399.29	290.66	322.72	342.93	365.46	340.11	489.5	456.81	398	470.1	434.42	473.37	374.07	345.04
1437734_at	Ppp1r12a	protein phosphatase 1, regulatory (inhibitor) subunit 12A	0.00691112	0.0027	19.38	613.44	282.16	660.25	723.07	760.52	716.51	552.09	441.4	503.85	498.37	520.11	540.19	594.55	632.5	1005.72	702.74	729.38	764.09	592.8	648.61	632.34	679.48	534.91	556.29	576.14	593.63
1437735_at	Ppp1r12a	protein phosphatase 1, regulatory (inhibitor) subunit 12A	0.04595	0.0353	16.5	2660.06	423.99	2607.6	2906.1	2729.24	2869.73	2626.67	2609.12	2812.47	2583.92	2551.83	2655.14	2654.73	2935.32	2982.44	2868.29	3146.56	3183.13	2647.14	2664.98	2335.15	2690.9	2640.04	2367.03	2726.61	2526.03
1437740_at	Plekhm2	pleckstrin homology domain containing, family M (with RUN domain) member 2	0.0148369	0.0121	7.8	224.35	67.55	189.61	223.59	201.98	198.02	242.58	322.06	228.49	263.84	237.16	211.07	224.86	186.97	213.31	223.85	191.18	208.77	226.43	226.9	245.25	227	238.8	233.45	188.94	199.65
1437743_at	Aebp2	AE binding protein 2	0.0468767	0.0299	16.06	213.04	118.42	239.27	237.8	226.72	212.87	209.49	165.16	213.2	199.81	193.63	195.68	225.19	402	214.94	252.52	285.35	200.51	195.57	185.09	178.82	217.41	186.65	166.13	235.4	220.95
1437781_at	Insm2	insulinoma-associated 2	0.000366934	0.000435	15.5	113.79	49.37	139.59	140.44	113.36	117.57	112.43	82.69	106.09	86.13	128.81	144.72	164.28	158.81	181.44	146.47	111.6	140.64	114.19	104.55	98.72	102.37	112.64	110.1	113.39	134.8
1437849_x_at	Armcx2	armadillo repeat containing, X-linked 2	7.45e-07	0.000275	6.7	352.11	75.55	283.08	317.26	347.31	358.25	383.33	382.54	433.2	365.08	386.99	360.33	350.93	302.76	300	293.46	307.55	336.33	361.41	395.52	353.29	434.17	370.55	331.5	320.42	317
1427127_x_at	Hspa1b	heat shock protein 1B	0.000247427	0.00193	19.66	233.69	344.42	573.61	333.76	393.2	349.15	231.47	181.54	79.82	129.59	146.02	192.6	619.01	693.68	497.96	235.91	141.6	351.02	253.92	186.57	143.18	138.41	123.65	227.63	635.2	768.65
1437936_at	6330534C20Rik	RIKEN cDNA 6330534C20 gene	0.00776537	0.00992	17.175	252.29	69.38	312.35	317.63	266.41	251.81	240.1	245.09	334.06	235.23	244.32	250.61	266	292.47	321.41	319.8	344.95	273.03	243.52	252.77	216.27	206.19	235.82	225.85	247.18	279.45
1437945_x_at	100043064 /// Nap1l1	predicted gene, 100043064 /// nucleosome assembly protein 1-like 1	0.00948896	0.0105	0.73	4122.33	367.27	4270.47	4122.62	4133.07	4334.95	4255.79	4138.64	4244.51	4008.44	3989.51	4022.77	4122.04	4464.9	4066.37	4673.63	4570.15	4487.71	4299.64	4097.3	4098.19	3979.69	4116.01	3939.09	4099.11	4114.21
1437967_at	---	---	0.00369017	0.0146	22.16	206.2	63.9	207.51	264.76	276.5	263.04	198.87	195.9	148.71	197.7	215.87	210.92	247.77	237.27	204.9	218.24	268.69	222.46	198.38	194.29	156.8	189.82	172.4	182.5	204.24	234.55
1438004_at	Pols	polymerase (DNA directed) sigma	0.00563385	0.00517	17.199	743.55	149.62	774.17	756.07	745.66	721.64	661.92	596.71	629.81	672.43	684.23	746.38	788.26	895.95	856.79	828.82	766.02	744.43	699.35	622.44	811.43	742.67	663.38	648.39	842.52	740.61
1438015_at	Dkc1	dyskeratosis congenita 1, dyskerin homolog (human)	0.0308637	0.0342	16.09	732.35	184.42	841.45	838.09	718.98	728.45	820.17	736.24	779.65	704.09	695.56	765.36	788.94	813.7	789.34	831.29	867.22	736.85	652.33	623.31	498.38	578.92	642.79	704.84	633.05	721.5
1438016_at	Dkc1	dyskeratosis congenita 1, dyskerin homolog (human)	0.00183227	0.000834	15.41	1333.46	268.73	1364.33	1407.44	1336.39	1362.77	1257.02	1276.99	1346.08	1330.53	1257.01	1238.2	1467.07	1700.94	1627.89	1597.21	1621.2	1486.68	1281.81	1165.99	1171.37	1225.68	1163.47	1255.6	1265.26	1390.91
1438025_at	Mtrf1l	mitochondrial translational release factor 1-like	0.0147487	0.0123	17.748	294.3	60.96	347.7	279.22	291.27	313.14	257.68	249.51	299.56	293.26	269.64	295.34	361.37	334.16	288.22	371.43	316.96	316.96	257.21	271.79	281.05	283.46	319.17	269.12	348.06	370.01
1438026_at	Zfp560	zinc finger protein 560	0.0287225	0.0072	11.92	534.28	153.65	519.55	474.02	465.64	485.94	496.96	704.67	651.84	751.85	752.29	651.56	495.89	480.8	579.31	530.1	546.14	488.16	616.07	520.83	538.47	563.96	596.2	636.21	449.71	444.99
1438033_at	Tef	thyrotroph embryonic factor	3.94e-06	0.000369	5.9	127.52	108.64	82.75	78.19	68.62	114.91	175.59	181.34	267.79	134.13	132.08	129.27	106.51	51.21	50.52	67.6	84.97	102.34	144.78	137.73	140.42	148.01	188.39	129.79	125.76	80.64
1438060_at	Npas3	neuronal PAS domain protein 3	0.00266941	0.000932	6	817.63	300.75	696.38	893.99	833.8	883.05	890.4	1032.53	917.92	906.78	883.32	845.31	763.97	681.6	431.03	679.46	768.64	762.21	801.47	931.18	950.86	834.69	773.43	680.42	681.97	648.74
1438068_at	---	---	0.00953054	0.00268	14.29	1420.64	472.49	1389.54	1467.29	1408.07	1473.56	1364.57	1251.86	1433.21	1340.73	1458.03	1327.6	1598.79	1928.74	1566.3	1549.62	1668.07	1444.95	1227.83	1207.62	983.75	1177.48	1242.88	1210.74	1442.69	1433.36
1438115_a_at	Slc9a3r1	solute carrier family 9 (sodium/hydrogen exchanger), member 3 regulator 1	1.47e-05	0.000655	8.77	1048.39	383.13	846.08	988.98	1005.65	1042.96	1026.36	1219.31	1159.31	1467.62	1304.32	1170.21	1021.39	888.45	701.35	868.29	970.72	1066.13	1053.82	1163.58	1200.18	1244.58	1165.38	1164.73	1008.59	1017.53
1438116_x_at	Slc9a3r1	solute carrier family 9 (sodium/hydrogen exchanger), member 3 regulator 1	2.23e-06	0.000318	7.1	865.08	317.48	734.91	752.04	841.59	847.62	893.51	943.68	936.98	1225.62	995.64	928.42	781.44	762.63	590.65	691.38	791.92	832.03	857.83	969.12	1035.22	1032.46	995.17	1010.43	872.32	844.18
1438117_x_at	Tmem41b	transmembrane protein 41B	0.000540706	0.00104	20.43	633.21	155.65	745.13	619.73	707.76	575.67	495.88	476.69	490.56	515.25	577.22	604.68	694.51	701.67	788	658.31	629.47	575.61	546.09	583.73	686.14	638.87	636.96	661.64	691.91	723.21
1438211_s_at	Dbp	D site albumin promoter binding protein	1.47e-09	0.000257	8.28	8341.24	9154.79	4875.49	4948.5	5501.07	7444.9	10472.7	14105.5	22363	13620.5	12032	9725.62	6147.54	5666.84	4053.36	4259.46	7513.74	7341.65	9168.74	10242.1	10267.7	12286	11524.6	9298.33	6835.19	5578.58
1438224_at	Zswim5	zinc finger, SWIM domain containing 5	0.000313119	0.0019	18.26	205	95.74	237.87	251.77	227.32	217.34	191.9	194.71	215.29	178.49	175.11	182.57	231.34	320.59	325.68	272.34	340.59	183.55	182.95	155.71	149.11	164.68	189.35	159.62	237.25	220.38
1438238_at	2010315B03Rik	RIKEN cDNA 2010315B03 gene	0.0082451	0.00215	15.02	882.36	216.97	838.87	967.72	912.68	895.89	883.2	774.07	902.78	826.27	826.79	881.51	919.39	1186.71	1029.7	1057.3	1140.98	1038.78	880.69	842.32	752.76	816.43	816.53	792.94	911.33	852.64
1438322_x_at	Fdft1	farnesyl diphosphate farnesyl transferase 1	0.000296683	0.000573	18	6167.04	1134.4	7336.28	6489.75	6729.5	6123.23	5168.18	5069.73	5406.65	5541.81	6129.23	6308.24	6701.44	7338.53	5923.2	7293.33	7272.16	6537.4	5905.35	5953.59	5543.36	6204.85	5716.78	6011.44	6418.77	6679.63
1438385_s_at	Gpt2	glutamic pyruvate transaminase (alanine aminotransferase) 2	0.00342959	0.00432	17.538	1205.27	315.27	1227.49	1248.06	1272.71	1269.81	1052.85	994.63	985.13	1238.69	1213.57	1396.94	1439.22	1319.02	973.64	961.02	1086.14	949.83	919.39	1063.55	968.9	1149.68	1196.96	1395.41	1514.43	1549.94
1438391_x_at	Hsd17b10	hydroxysteroid (17-beta) dehydrogenase 10	0.0116132	0.0169	0.41	448.26	104.71	458.36	449.55	465.03	529.74	452.44	415.81	446.97	445.17	425.97	411.57	421.62	507.28	557.64	513.16	524.75	437.39	464.95	458.37	348.21	425.35	376.66	441.02	407.33	466.09
1438402_at	Fam171a1	family with sequence similarity 171, member A1	0.00643293	0.00452	19.51	159.32	80.55	200.46	161.24	164.92	156.5	150.89	116.5	131.09	127.48	142.69	131.79	162.63	159.6	277.61	204.02	176.8	159.03	148.4	150.95	159.69	145.34	150.83	181.19	173.25	170.07
1438407_at	Dsel	dermatan sulfate epimerase-like	7.21e-06	0.000237	18.546	1402.46	1046.24	1913.93	2161.18	2014.46	1833.86	955.96	1053.64	1343.58	1166.79	1030.85	1072.28	1553.6	2535.11	2293.07	2780.98	3044.6	2263.44	1461.35	1042.36	1209.72	1188.67	984.49	952.13	1341.01	1525.74
1438413_at	Senp7	SUMO1/sentrin specific peptidase 7	0.00019176	0.0075	21.37	714.79	173.46	784.43	839.99	862.56	858.49	720.64	662.81	656.64	644.46	741.37	682.82	724.06	700.6	786.19	763.22	903.69	845.67	739.5	708.94	556.76	650.21	658.31	601.81	661.4	628.03
1438427_at	Fam120b	family with sequence similarity 120, member B	6.28e-07	0.000157	11.04	124	50.42	106.15	105.12	100.29	95.14	122.84	161.93	189.31	165.1	175.75	173.88	121.15	88.46	93.32	124.38	108.38	91.9	123.61	154.67	154.5	170.69	183.69	130.98	126.44	104.23
1438458_a_at	Sfpq	splicing factor proline/glutamine rich (polypyrimidine tract binding protein associated)	5.48e-05	0.000602	16.92	1273.67	722.63	1503.56	1716.22	1135.02	1184.35	1230.79	1171.68	1093.24	1084.95	1168.52	1316.55	1583.8	1853.55	2508.7	1642.9	1469.04	1454.01	1320.04	1176.41	1063.45	1105.45	1187.58	1223.88	1538.96	1523.64
1438566_at	St8sia6	ST8 alpha-N-acetyl-neuraminide alpha-2,8-sialyltransferase 6	7.45e-06	0.00012	8.08	290.15	258.01	190.26	215.65	252.43	302.4	355.55	451.02	671.15	497.46	422.79	358.46	264.78	225.06	198.86	228.62	227.49	155.13	269.64	343.5	376.07	376.94	339.43	308.03	277.89	173.36
1438636_s_at	Susd5	sushi domain containing 5	0.0429578	0.0282	17.205	127.41	65.33	142.92	130.05	123.73	156.48	103.12	111	123.72	127.2	134.11	131.71	114.11	162.18	159.04	160.07	198.1	117.57	99.95	119.33	67.44	104.32	102.49	134.87	140.1	127.63
1438657_x_at	EG667723 /// LOC100044742 /// OTTMUSG00000011595 /// OTTMUSG00000026290 /// Ptp4a1	predicted gene, EG667723 /// similar to tyrosine phosphatase /// predicted gene, OTTMUSG00000011595 /// predicted gene, OTTMUSG00000026290 /// protein tyrosine phosphatase 4a1	3.1e-06	0.000343	7.1	21876.3	6005.59	19493.3	20967.4	20521.7	23447.7	23714.9	25559.9	29314.5	24914	22100.5	20137.7	20340.2	21652.2	17303.4	18876.2	20293.9	23031	22161.7	23649.1	25037.6	24043.3	22179.7	20196	19608.8	19662.8
1438693_at	Tmem110	transmembrane protein 110	0.0182603	0.00347	11.65	268.41	69.13	253.45	208.57	233.19	260.65	261.28	326.31	346.83	329.12	312.2	286.17	263.46	268.27	275	268.55	270.17	221.49	307.97	277.54	296.71	275.96	256.3	266.06	245.68	211.66
1438695_at	C230091D08Rik	RIKEN cDNA C230091D08 gene	0.012477	0.0178	19.54	1819.82	355.04	1767.71	2020.68	2055.67	2047.27	1736.4	1698.55	1618.43	1728.25	1794.68	1815	1921.66	2294.16	1873.84	1952.17	2127.67	1906.53	1685.54	1824.65	1763.43	1736.28	1723.75	1584.09	1869.73	1832.99
1438703_at	Ankrd26	ankyrin repeat domain 26	0.00761292	0.00336	14.4	275.96	128.13	301.28	322.01	249.07	295.4	281.71	270.21	290.94	216.68	261.57	299.69	290.26	411.65	320.76	375.61	445.42	344.29	232.5	221.02	192	189.16	234.79	207.88	238.16	260.15
1438720_at	9330159F19Rik	RIKEN cDNA 9330159F19 gene	0.000939477	0.0264	20.48	318.6	77.8	329.51	418.46	371.63	333.74	329.92	284.6	319.58	262.87	280.89	329.1	319.66	402.78	317.62	356.36	358.73	319.99	288.88	285.42	286.48	274.93	275.78	268.61	294.21	291.54
1438727_at	Wdr32	WD repeat domain 32	0.00485709	0.00281	16.59	245.14	46.88	262.11	257.71	247.59	233.86	221.45	233.84	243	253.84	245.53	281.6	295.13	300.5	245.34	226.13	246.08	228.29	213.18	228.34	237.81	239.05	248.21	244.94	306.95	226.68
1438728_at	Nif3l1	Ngg1 interacting factor 3-like 1 (S. pombe)	0.00690086	0.0131	22.29	258.56	49.74	296.86	259.7	320.8	296.2	252.72	227.26	237.37	242.49	257.42	222.81	274.77	288.73	280.19	265.48	235.46	271.19	265	245.49	221.32	242.07	231.23	229.7	271.14	312.35
1438754_at	---	---	0.0104777	0.00297	11.97	256.82	71.88	209.39	262.37	255.77	257.86	267.13	264.68	244.72	347.64	323.98	322.86	281.59	244.36	235.59	203.88	243.98	204.69	247.43	261.08	280.12	303.86	243.32	288.17	248.36	219.79
1438761_a_at	EG627245 /// EG666231 /// EG668343 /// LOC677259 /// Odc1	predicted gene, EG627245 /// predicted gene, EG666231 /// predicted gene, EG668343 /// similar to Ornithine decarboxylase (ODC) /// ornithine decarboxylase, structural 1	4.67e-06	0.000708	9.26	3482.68	2003.02	2480.66	2863.45	3074.01	3553.96	3765.39	4763.52	6486.71	4085.92	3555.21	3152.64	2776.57	3089.9	2741.49	3166.39	3411.4	4091.83	3909.03	3963.99	3713.65	4117.71	3601.76	3185.46	2861.91	2753.59
1438774_s_at	Pgm2l1	phosphoglucomutase 2-like 1	0.000518417	7.72e-05	7.7	1383.25	667.02	1008.49	1360.29	1239.18	1262.79	1945.33	1755.41	1729.92	1604.94	1696.7	1763.96	1379.93	802.58	825.54	611.28	750.56	874.67	1257.19	1514.24	1559.29	1532.93	1624.2	1669.93	1386.58	1169.95
1438790_x_at	Tmem41b	transmembrane protein 41B	0.000175512	0.00136	19.62	667.81	153.51	762.28	687.79	700.93	620.23	571.97	537.66	524.72	619.02	601.14	660.17	706.08	754.72	831.74	662.44	672.15	666.01	577.03	646.33	687.66	669.6	661.88	699.99	734.84	734.01
1438902_a_at	Hsp90aa1	heat shock protein 90, alpha (cytosolic), class A member 1	0.00297068	0.00153	23.31	26185.4	4309.07	25124.9	27146.8	28090.5	26124.2	26263.2	24200.4	25994.6	24342.4	22751.1	24170.6	25086	28813.8	31369.2	27806.2	29035.7	28056.4	26657.7	26246.6	24543.4	25557.8	25414	24924.4	27394	26658.4
1438988_x_at	Hn1	hematological and neurological expressed sequence 1	0.00673454	0.00894	21.45	2869.48	589.34	3108.96	3114.24	3109.59	3126.88	2669.45	2836.2	2939.69	2774.56	2461.78	2494.93	2778.65	3328.03	2738.07	3247.84	3115.1	3640.46	2933.53	2636.95	3001.61	2693.34	2696.56	2578.56	2573.22	2902.76
1439014_at	1600021P15Rik	RIKEN cDNA 1600021P15 gene	0.024413	0.00445	15.35	579.59	154.76	666.02	585.94	620.73	592.76	591.63	529.98	680.69	579.73	540.8	528.29	579.44	773.98	817.19	765.69	732.06	640.12	560.74	546.78	529.52	507.67	552.01	539.33	554.91	563.62
1439032_at	Cep27	centrosomal protein 27	0.00465999	0.00287	10.41	560.82	80.34	532	529.89	561.18	558.07	557.56	576.82	617	623.97	621.21	589.79	554.87	463.29	566.68	527.8	547.47	518.65	570.2	617.96	571.94	560.47	603.54	571.39	534.27	502.87
1439035_at	Zfp322a	zinc finger protein 322a	0.0247811	0.0255	17.202	660.3	180.8	681.96	714.06	658.23	706.31	685.76	558.65	657.11	531.74	690.77	669.01	709.09	833.04	626.5	755.31	779.54	670.27	570.21	592.63	471.43	605.62	612.87	553.21	662.38	642.59
1439038_at	9130227C08Rik	RIKEN cDNA 9130227C08Rik gene	0.00105861	0.00344	12.2	286.84	50.78	264.1	277.02	241.6	302.04	270.15	278.27	307.15	316.85	314.25	318.61	290.92	225.14	275.97	251.81	243.37	282.76	295.49	298.33	307.57	326.7	293.71	298.38	270.75	276.65
1439041_at	Slc39a10	solute carrier family 39 (zinc transporter), member 10	0.0241709	0.00128	19.46	242.24	120.9	299.85	325.23	316.02	312.66	188.24	151.55	230.12	143.23	173.95	184.46	220.25	325.55	217.3	385.03	339.11	371.91	222.87	273.12	309.59	281.78	198.23	190.66	235.78	248.71
1439131_at	4932441K18Rik	RIKEN cDNA 4932441K18 gene	0.000500782	0.00349	21.15	230.01	77.61	262.24	271.58	292.12	283.52	223.91	170.02	219.69	205.98	206.73	230.5	245.22	302.5	297.3	229.53	248.08	325.23	229.12	215.73	207.49	213.64	184.26	221.22	239.23	282.86
1439271_x_at	Ik	IK cytokine	0.0306337	0.0055	21.25	7034.92	636.29	7209.91	7040.83	7422.87	6906.69	6898.91	6318.82	6502.74	6771.25	7029	7251.66	7276.4	6930.91	7567.5	6751.7	7099.53	6634.64	6782.92	7027.78	6614.75	7296.64	7285.85	7591.4	7187.4	7279.6
1439272_at	Lcorl /// LOC100046011	ligand dependent nuclear receptor corepressor-like /// hypothetical protein LOC100046011	0.0266559	0.00482	7	695.86	234.43	558.75	698.32	725.74	673.35	822.9	843.28	761.35	761.34	746.25	784.47	764.04	611.98	374.42	568.24	693.41	627.16	675.43	780.77	671.86	772.06	709.69	628.61	614.61	587.11
1439302_at	Uba6	ubiquitin-like modifier activating enzyme 6	0.00298712	0.0165	21.44	263.32	73.52	263.6	283.84	269.84	316.44	271.18	202.18	260.37	202.31	218.8	215.22	287.87	330.81	303.4	272.28	294.51	269.26	273.99	260.11	205.51	235.22	226.53	183.77	263.05	258.03
1439411_a_at	Xpo7	exportin 7	0.00928074	0.0018	22.06	3154.27	411.45	3323.25	3057.32	3232.8	3162.65	2842.43	2764.88	2713.46	2647.48	2879.84	2996.93	3336.44	3470.37	3288.36	3216.94	3062.42	2972.75	3083.88	3069.84	3192.38	3167.2	3145.88	3222.45	3377.02	3228.75
1439433_a_at	Slc35a2	solute carrier family 35 (UDP-galactose transporter), member A2	0.0085863	0.0494	11.62	778.57	150.92	597.07	626.72	644.76	591.22	702.65	792.22	871.73	870.31	761.63	815.56	738.54	784.59	675.65	693.35	839.66	781.72	893.05	760.5	890.29	890.2	878.05	775.41	877.71	734.85
1439541_at	4930414L22Rik	RIKEN cDNA 4930414L22 gene	0.0332439	0.0261	18.732	306.07	59.61	363.95	313.14	344	308.19	281.06	302.26	276.09	296.04	338.92	306.64	305.5	331.81	334.54	372.83	298.35	265.62	303.26	325.79	253.61	279.08	303.34	323.14	298.69	344.44
1439607_at	Slc7a14	solute carrier family 7 (cationic amino acid transporter, y+ system), member 14	0.0031268	0.00292	6.2	1091.17	342.58	1070.89	1019.93	1072.14	1084.55	1142.68	1022.83	1097.78	1111.85	1190.26	1194.64	1083.51	778.81	747.85	715.95	728.91	926.43	1180.42	1306.99	1306.38	1401.12	1321.54	1160.54	1071.88	1099.49
1439618_at	Pde10a	phosphodiesterase 10A	0.00205621	0.00312	7.6	1657.55	568.09	1231.99	1511.15	1623.58	1780.63	2252.18	2368.17	2137.5	1874.16	1846.79	1665.23	1469.37	1438.63	1688.2	1284.41	1447.75	1719.66	1681.21	2132.48	1315.79	1812.4	1649.88	1413.74	1247.32	1253.92
1439630_x_at	Sbsn	suprabasin	0.0262202	0.0234	9.88	567.16	136.65	558.84	451.26	502.37	505.43	508.47	607.55	579.82	598.18	626.31	575.49	445.4	405.35	546.16	590.19	528.14	517.75	605.49	610.24	600.35	678.65	607.06	666.89	532.56	490.07
1439697_at	Il1rap	interleukin 1 receptor accessory protein	0.0130941	0.0112	11.27	135.5	42.99	81.48	119.51	112.83	125.19	126.91	149.4	158.5	153.62	150.54	159.87	130.11	115.88	140.29	106.57	101.76	165.17	151.79	167.47	138.79	135.77	145.68	132	135.22	129.17
1439757_s_at	Epha4	Eph receptor A4	0.0486209	0.0409	14.9	635.15	228.03	708.76	723.87	670.96	755.92	651.92	655.56	654.46	594.36	634.82	635.47	743.72	963.86	770.02	626.28	750.29	609.81	559.03	529.94	507.8	568.54	516.72	516.88	598.91	619
1439830_at	Map3k5	mitogen-activated protein kinase kinase kinase 5	0.00212923	0.000561	15.12	795.52	722.36	982.21	931.2	777.29	808.52	651.05	695.12	968.57	700.93	696.68	782.52	997.9	2017.01	1726.18	1432.9	1445.71	1167.69	750.58	572.28	623.41	699.74	724.65	764.42	1021.12	945.95
1439851_at	---	---	0.00590226	0.00906	18	389.55	74.07	430.47	394.37	403.37	421.87	384.18	334.81	435.8	366.25	358.12	355.69	384.72	464.81	459.32	463.33	380.46	447.94	419.07	366.62	351.4	316.66	346.59	345.47	399.09	401.69
1439859_at	9630033F20Rik /// LOC677429	RIKEN cDNA 9630033F20 gene /// similar to RIKEN cDNA 9630033F20 gene	0.0220667	0.0199	19.1	129.71	36.77	161.68	137.53	178.87	148.02	109.99	128.76	117.38	115.56	111.69	112.08	135.15	178.85	166.92	143.37	129.67	129.62	153.5	129.75	148.93	119.76	105.34	109.48	121.33	129.89
1439872_at	---	---	0.0463061	0.0304	14.16	998.64	261.03	950.27	1089.57	1149.26	1110.83	1025.72	1122.71	990.11	953.83	983.73	1059.38	1072.55	1322.36	1208.23	1262.29	1215.03	901.66	976.33	914.03	852.4	800.29	908.6	831.02	1007.16	924.81
1439934_at	Slc30a10	solute carrier family 30, member 10	0.0212674	0.00609	20.62	135.48	36.24	175.04	128.27	149.95	153.7	126.66	107.7	106.54	131.09	133.91	125.06	155.52	179.02	131.84	165.68	131.7	126.28	118.26	133.35	137.05	145.17	148.39	151.13	141.1	173.62
1439994_at	---	---	0.0140599	0.0049	23.98	299.46	40.27	299.09	304.47	348.66	330.18	293.91	281.5	299.83	271.84	269.02	285.46	278.09	271.03	302.45	293.36	309.23	330.59	304.1	317.18	312.3	301.88	294.93	268.12	294.97	313.48
1440147_at	Lgi2	leucine-rich repeat LGI family, member 2	0.0017081	0.000706	20.75	1178.89	631.66	1347.07	1484.93	1637.49	1592.03	1217.27	886.53	489.22	783.92	1036.64	898.9	1088.19	1245.03	1289.42	1301.64	1752.54	1243.09	1140.51	1361.25	1309.33	994.17	821.14	920.37	954.45	1047.01
1440193_at	Ankrd12 /// Ankrd12-like	ankyrin repeat domain 12 /// ankyrin repeat domain 12-like	0.000456859	0.00435	9.63	1806.07	356.15	1477.63	1578	1495.31	1632.12	1821.51	1976.98	2189.93	1872.35	1789.29	1958.06	1801.24	1948.92	1592.03	1745.07	1693.29	1745.93	1810.91	1849.24	2006.06	1922.71	2040.34	1796.27	1965.28	1606.34
1440195_at	Serbp1	Serpine1 mRNA binding protein 1	0.00806332	0.00807	20.01	421.41	146.46	429.91	503.52	489.29	496.62	359.81	312.27	361.84	382.06	372.33	359.37	452.51	605.2	441.7	471.97	468.7	461.31	359.96	404.84	423.88	418.94	334.44	351.5	412.7	461.05
1440278_at	Dynll1	dynein light chain LC8-type 1	0.000130727	0.00293	18.51	157.06	55.56	201.79	185.34	188.43	174.33	145.29	131.37	142.9	148.22	150.82	150.44	163.86	238.87	242.48	192.12	149.97	160.64	152.66	168.53	143.97	144.92	141.87	153.48	166.89	183.54
1440384_at	Tmcc1	transmembrane and coiled coil domains 1	0.0459477	0.0347	15.48	445.08	96.9	474.76	471.61	458.01	490.58	428.99	437.36	389.02	481.38	485.99	495.9	517.07	399.05	386	323.26	332.12	366.54	409.74	374.59	446.7	430.84	443.45	459.81	479.28	486.49
1440478_at	LOC100047601	similar to DNA segment, Chr 10, ERATO Doi 438, expressed	0.0198543	0.00676	6.9	359.17	52.63	360.45	337.2	357.9	384.18	385.24	367.96	434.41	429.91	378.53	351.31	329.15	350.23	361.23	339.08	356.86	349.22	353.6	387.97	342.09	397.35	394.77	372.29	347.5	339.96
1440531_at	Rbm11	RNA binding motif protein 11	0.0469284	0.00247	8.96	126.18	84.7	126.92	126.51	119.9	141	125.86	129.38	204.67	173.77	156.87	131.14	113.24	94.17	35.28	105.39	131	111.7	100.11	133.37	170.59	181.14	118.73	119.95	101.59	94.95
1440545_at	ENSMUSG00000075319	predicted gene, ENSMUSG00000075319	0.00567731	0.00138	5.7	1309.46	370.59	1305.72	1263.34	1335.59	1325.29	1286.97	1538.4	1597.94	1209.59	1402.55	1313.2	1346.6	1100.12	856.76	1089.6	1166.01	1178.49	1319.88	1435.91	1445.76	1549.45	1322.19	1176.55	1225.96	1138.62
1440655_at	---	---	0.000767241	0.00365	20.82	500.96	115.8	571.25	586.41	630.34	595.75	504.38	444.92	418.11	468.71	497.57	504.34	476.52	603.2	483.75	621.81	649.71	600.07	465.13	521.86	432.85	482.71	464.35	459.11	441.35	531.29
1440826_s_at	2610002I17Rik	RIKEN cDNA 2610002I17	0.0471481	0.0341	17.741	276.24	63.74	328.57	295.97	295.11	306.59	290.07	231	216.61	286.43	287.92	261.31	298.78	335.28	343.95	264.38	286.81	258.71	243.31	288.27	216.46	222.28	264.95	262.6	236.03	266.04
1440831_at	Bach1	BTB and CNC homology 1	0.00408443	0.0103	8.1	669.7	123.97	598.33	642.37	678.99	796.25	736.94	690.78	818.48	670.02	711.91	660.45	672.28	669.37	570.54	641.44	639.68	800.86	707.72	693.78	734.31	654.01	635.32	621.74	621.09	611.1
1440934_at	6230409E13Rik	RIKEN cDNA 6230409E13 gene	0.0449523	0.0159	2.56	335.12	117.9	324.68	357.9	412.94	393.39	323.02	304.08	295.61	336.09	362.6	347.1	334.91	273.08	228.78	294.44	300.54	335.34	355.1	405.56	464.58	379.3	385.29	305.24	295.95	304.98
1440975_at	Mxra7	matrix-remodelling associated 7	0.00141772	0.0012	12.14	114.14	39.61	89.4	100.06	100.46	88.26	109.06	133.97	146.4	138.31	139.73	133.03	89.42	122.3	115.42	96.49	112.87	99.77	126.42	129.47	167.49	139.29	104.75	115.98	106.74	99.77
1440981_at	Pak7	p21 (CDKN1A)-activated kinase 7	0.00303012	0.00207	14.78	220.53	162.89	270.11	319.8	216.92	240.07	200	198.98	264.62	201.2	215.69	228.28	248.46	485.52	364.43	356.94	387.73	280.47	189.48	159.74	178.05	173.67	182.22	197.21	207.35	224.14
1441065_at	Shc3	Src homology 2 domain-containing transforming protein C3 (Shc3), mRNA	0.0498302	0.00109	7.2	1093.3	499.39	1016.88	1111.67	1104.83	1361.69	1298.17	1497.52	1082.91	1554.66	1229.08	1291.69	1076.42	717.17	760.33	609.7	555.88	866	1103.33	1083.28	1223.86	1044.86	1118.62	1075.93	1202.07	1055.72
1441087_at	2810011L19Rik	RIKEN cDNA 2810011L19 gene	0.0188138	0.00647	15.7	1018.11	278.24	1157.64	1009.68	1020.51	1053.49	993.49	1016.3	1061.84	1002.59	916.4	952.51	1019.91	1416.91	1242.97	1161.83	1176.31	1139.36	1061.79	860.44	952.25	900.28	977.56	910.33	992.18	1035.48
1441334_at	---	---	0.00158716	0.00329	12.65	337.93	110.4	309.03	341.57	253.53	330.57	312.36	317.46	463.67	447.55	419.83	379.59	334.89	377.99	242.86	332.77	320.99	315.88	344.99	344.9	410.11	374.97	462.39	338.2	337.66	275.47
1441380_at	Ttc39c	tetratricopeptide repeat domain 39C	0.0426823	0.00657	4.5	100.02	39.09	106.46	89.9	101.45	114.8	102.39	109.92	98.58	102.5	105.97	84.63	85.29	58.48	98.45	85.02	62.26	105.38	116.9	125.73	136.67	129.42	97.38	94.39	91.5	92.61
1441429_at	Irs4	insulin receptor substrate 4	0.0260661	0.00751	19.95	2671.76	1644.9	3041.41	3149.89	2674.84	3130.3	2454.29	2177.85	2056.7	2180.58	2528.18	2317.35	2644.19	2875.63	2668.68	3482.7	2711.7	5202.21	3630.05	2713.71	2683.2	2137.86	2557.74	1912.41	2420.42	3257.38
1441430_at	---	---	7.23e-05	0.00138	18	1028.12	217.04	1039.22	1128.94	1043.01	859.05	844.97	811.91	777.53	1017.03	961.46	1135.99	1167.05	1173.86	1074.53	1130.47	1211.61	784.61	867.74	943.72	912.32	941.78	995.22	1117.48	1093.17	1073.91
1441662_at	Cyp4x1	cytochrome P450, family 4, subfamily x, polypeptide 1	0.00290851	0.00344	16.82	657.36	278.28	683.02	744.33	775.69	702.24	599.53	597.01	702.87	563.27	558.44	539.57	610.04	1050.29	752.23	1039.48	990.96	877.41	692.02	620.82	626.02	631.7	589.35	493.72	553.37	684.02
1441727_s_at	Zfp467	zinc finger protein 467	0.000217526	0.00403	18.514	457.82	188.17	464.51	484.2	487.27	454.99	425.37	362.36	352.81	403.16	406.65	475.75	498.62	619.9	466.22	550.65	721.91	460.65	397.48	380.97	345.56	388.28	414.96	394.13	556.62	508.74
1441788_s_at	Dkc1	dyskeratosis congenita 1, dyskerin homolog (human)	0.0204729	0.00571	15.77	646.84	239.86	655.31	736.2	654.33	618.45	632.91	590.72	670.58	633.79	549.12	639.16	764.27	986.41	733.94	713.09	845.88	707.42	597.3	622.5	506.7	628.17	639.35	565.05	679.21	726.3
1441814_s_at	Rpain	RPA interacting protein	0.0281321	0.01	15.3	271.01	55.75	308.24	251.26	268.99	243.53	263.51	238.4	295.19	245.06	261.79	282.25	302.16	349.9	321.6	277.46	283.59	254.29	276.32	251.46	262.63	263.97	273.03	263.23	310.91	293.75
1441938_x_at	Cables1	CDK5 and Abl enzyme substrate 1	0.0101332	0.00267	14.66	227.27	73.61	229.22	282.65	243.48	242.62	211.73	184.15	183.14	261.66	325.39	296.63	330.36	280.88	223.15	216.96	247.73	198.15	188.29	198.18	189.32	224.05	220.76	225.33	256.08	262.43
1442025_a_at	---	---	0.0284863	0.0179	10	167.37	158.63	140.48	165.72	169.28	171.94	147.98	176.83	136.92	196.49	256	301.98	358.37	137.47	120.9	97.73	169.02	142.28	121.13	123.45	118.34	148.94	202.31	269.82	414.98	193.11
1442051_at	Hist1h3b /// Hist1h3c /// Hist1h3d /// Hist1h3e /// Hist1h3f /// Hist2h3b /// Hist2h3c1 /// Hist2h3c2	histone cluster 1, H3b /// histone cluster 1, H3c /// histone cluster 1, H3d /// histone cluster 1, H3e /// histone cluster 1, H3f /// histone cluster 2, H3b /// histone cluster 2, H3c1 /// histone cluster 2, H3c2	0.0236977	0.0163	16.07	153.5	62.77	158.23	182.65	148	177.28	151.25	155.43	160.73	155.03	151.83	148.49	151.53	218.66	200.22	207.73	147.54	173.47	158	128.52	115.72	93.11	119.29	151.97	138.41	175.98
1442116_at	Gpr176	G protein-coupled receptor 176	0.00449222	0.00124	14.8	614.47	487.84	666.98	737.57	626.43	602.51	515.64	536.32	808.15	530.99	510.1	549.61	786.53	1423.82	1175.71	1106.14	1144.37	739.59	595.89	479.38	448.14	515.84	539.51	500.09	750.13	722.25
1442154_at	Zrsr2	zinc finger (CCCH type), RNA binding motif and serine/arginine rich 2	0.0463698	0.022	13.86	447.47	97.08	433.51	416.45	458.34	440.91	436.18	447.43	440.54	490.11	448.77	518.54	458.51	491.96	356.97	438.43	408.6	376	370.93	440.85	480.08	551.13	457.22	475.56	478.23	447.51
1442384_at	---	---	0.0109751	0.00217	3.92	100.19	35.2	95.81	109.96	104.09	109.26	113.96	97.48	82.93	122.94	96.04	99.81	93.3	57.77	76.53	89	100.57	119.19	119.52	120.57	128.17	120.68	106.74	92.08	78.61	83.7
1442465_s_at	Strbp	spermatid perinuclear RNA binding protein	0.000571973	0.000615	17.151	1092.98	223.09	1215.57	1146.15	1114	1128.34	1067.58	1023.91	1035.77	975.22	1063.9	989.89	1208.04	1364.92	1186.01	1214.42	1264.95	1277.86	1156.45	1071.97	918.75	1058.16	997.44	988.61	1031.45	1122.77
1442905_at	---	---	6.69e-06	0.000772	12.18	316.18	150.8	270.86	288.63	284.82	266.63	292.74	323.49	493.29	439.6	405.81	409.34	366.3	270.82	191.7	254.46	329.66	278.21	308.87	371.61	416.18	483.91	365.09	382	300.49	298.63
1442999_at	B930036G03Rik	RIKEN cDNA B930036G03 gene	0.0171583	0.0151	21.42	326.46	64.95	327.71	398.56	380.96	371.45	323.93	268.66	310.34	325.69	309.98	317.54	339.31	381.89	301.68	390.41	392.87	328.53	322.34	324.97	327.24	311.76	271.72	324.37	327.83	338.79
1443108_at	---	---	0.0135783	0.0235	20.65	119.63	74.4	138.89	136.86	127.96	153.29	139.45	68.02	121.8	74.55	99.62	90.23	155.47	216.82	113.24	117.45	154.78	159.2	89.37	83.28	83.81	105.27	84.43	86.78	130.7	126.55
1443290_at	---	---	0.00339873	0.00628	6.3	304.17	108.3	261.06	304.69	322.45	341.22	321.09	376.04	419.11	303.64	336.24	309.73	286.3	251.03	202.52	273.68	332.45	238.74	300.13	336.75	363.61	391.1	274.9	287.44	224.53	265.39
1443694_at	Rgs20	regulator of G-protein signaling 20	0.00150579	0.000503	7	486.49	145.85	439	449.73	416.8	532.49	529.53	605.86	568.6	639.39	523.33	482.99	533.41	446.66	383.96	347.68	381.88	506.52	532.25	486.12	506.95	477.84	521.12	479.64	486.87	464.35
1443698_at	Xaf1	XIAP associated factor 1	0.0347715	0.00151	6.8	116.19	73.75	109.08	117.13	113.43	134.26	133.31	142.71	102.7	180.11	156	115.42	92.36	67.2	32.61	84.01	93.16	86.14	119.25	138.26	118.52	165.62	116.96	144.58	92.06	88.96
1443865_at	Gabra2	gamma-aminobutyric acid (GABA-A) receptor, subunit alpha 2	0.000586438	0.00892	20.74	152.14	90.17	205.24	209.08	201.66	189.53	153.68	127.54	110.49	133.9	138.4	123.63	145.84	177.66	290.83	183.81	156.61	150.59	160.46	175.48	145.36	136.91	140.88	128.57	143.61	169.82
1443867_at	Ankrd12 /// Ankrd12-like	ankyrin repeat domain 12 /// ankyrin repeat domain 12-like	0.0453523	0.00746	7.1	662.74	163.91	428.11	608.53	578.5	542.2	728.58	740.44	719.67	684.22	726.94	755.93	672.5	587.53	428.34	496.52	611.38	543.4	682.73	691.47	477.75	691.29	691.92	653.49	672	568.01
1444606_at	Efna2	ephrin A2	0.0180161	0.00243	14.44	166.81	33.08	196.62	174.18	159.55	155.26	151.26	191.3	141.57	176.16	182.31	170.95	184.03	194.4	203.05	180.22	174.36	153.91	146.05	136.89	154.25	146.17	157.93	162.67	161.5	172.81
1444640_at	Pigg	phosphatidylinositol glycan anchor biosynthesis, class G	0.0126495	0.0153	16.59	158.82	70.45	160.28	184.76	171.75	185.67	159.46	123.25	196.47	122.57	142.8	156.64	158.51	245.42	233.16	194.75	231.01	186.05	159.13	139.79	104.52	150.9	155.48	134.94	154.37	156.69
1445684_s_at	Hdac2	histone deacetylase 2	6.53e-05	0.00019	18.524	4321.56	591.34	4636.07	4374.45	4449.05	4509.8	4096.42	3797.37	3971.58	4093.1	4112.75	3964.21	4694.31	4980.04	4802.15	4612.41	4362.45	4750.93	4341.24	4246.2	3984.5	3915.93	4176.45	4103.92	4301.88	4621.79
1445815_at	Fzd8	frizzled homolog 8 (Drosophila)	0.00239252	0.00136	14.19	200.13	303.53	246.01	296.07	156.35	147.97	90.48	135.26	285.72	152.94	208.42	201.14	247.83	662.96	544.02	506.81	547.37	199.12	131.5	76.44	55.89	92.69	174.37	176.75	201.53	220.12
1446750_at	Impact	imprinted and ancient	0.00703815	0.0107	9.97	155.39	82.02	97.91	104.01	81.31	144.44	129.85	159.15	245.35	126.39	167.34	165.13	121	111.89	92.3	151.72	121.05	198.02	231.16	200.54	212.79	228.34	186.65	152.63	178.68	158.15
1446771_at	Tuba8	tubulin, alpha 8	9.29e-09	0.000438	16.62	163.64	411.15	421.2	388.05	227.17	168.82	112.32	83.78	115.93	94.37	110.16	158.46	305.98	851.91	876.65	725.59	669.77	280.65	130.73	54.43	54.35	66.09	116.39	127.22	242.58	329.34
1447027_s_at	Lias	lipoic acid synthetase	4.76e-10	0.000179	10.48	2291.36	441	2188.35	2065.59	2239.45	2088.25	2265.63	2480.46	2671.79	2770.6	2599.96	2469.78	2277.62	2141.18	1949.23	2027.09	2083.47	2182.02	2356.9	2460.99	2831.24	2756.32	2550.52	2658.27	2305.11	2277.11
1447223_at	---	---	0.000201348	0.00174	10.8	691.07	353.91	524.67	577.3	601	529.54	642.85	846.18	1141.62	995.92	948.23	845.08	544.05	484.45	521.28	620.83	938.88	612.96	739.29	803.82	855.86	926.4	834.76	834.33	525.53	433.8
1447234_s_at	Snx6	sorting nexin 6	0.0165703	0.00917	18.257	1309.36	315.18	1329.2	1519.83	1379.61	1361.4	1279.67	1190.56	994.83	1406.15	1277.98	1300.23	1437.59	1553.29	1501.51	1264.77	1538.84	1311.68	1264.02	1352.27	922.94	1147.55	1191.06	1273.31	1361.42	1307.04
1447275_at	Bbs12	Bardet-Biedl syndrome 12 (human)	0.000670167	0.00223	16.39	137.78	76.43	149.74	137.98	143.15	140.57	118.18	128.32	125.8	106.47	130.59	130.5	163.03	238.7	153.38	154.99	157.65	137.58	138.9	111.76	116.93	85.84	107.31	126.05	162.15	170.65
1447585_s_at	Mrps6	mitochondrial ribosomal protein S6	0.0178123	0.00362	15.75	2252.62	708.19	2627.46	2265.81	2084.7	2191.21	2192.47	2239.44	2683.66	2221.95	1990.35	1998.43	2498.51	3297.2	2896.45	3181.99	3037.73	2664.54	2355.51	1880.81	1929.37	1942.21	2135.93	2125.56	2691.49	2721.53
1447676_x_at	S100a16	S100 calcium binding protein A16	0.00535931	0.0011	5.5	1542.11	779.35	1452.38	1516.52	1634.95	1873.38	2060.97	2302.75	1411.21	2434.14	1567.69	1324.68	1250.19	875.44	1025.95	1237.51	1099.69	1232	1900.19	2045.77	1856.8	1702.15	1728.63	1798.65	1507.92	1434.3
1447818_x_at	Rhebl1	Ras homolog enriched in brain like 1	0.000104741	0.00192	6.2	126.98	42.96	102.8	83.4	114.42	127.47	133.77	145.73	169.32	137.01	126.48	126.26	106.03	98.94	95.5	123.4	98.11	134.8	126.41	154.04	128.43	159.01	130.64	127.96	127.61	120.66
1447898_s_at	Sfrs6	splicing factor, arginine/serine-rich 6	0.0223844	0.0134	8.24	1720.64	228.78	1470.47	1525.66	1679.14	1631.91	1776.4	1816.32	1829.04	1808.05	1662.44	1690.41	1656.31	1667.23	1615.69	1737.02	1875.78	1819.08	1748.89	1846.27	1704.26	1928.03	1835.67	1638.52	1765.9	1607.9
1447904_s_at	Fnta /// LOC100046996	farnesyltransferase, CAAX box, alpha /// similar to farnesyltransferase alpha subunit	6.5e-05	0.000741	20.16	5407.92	623.18	5701.73	5450.73	5672.97	5412.21	4910.9	5064.8	4902.08	4683.51	5025.78	5253.68	5761.91	5899.12	5403.63	5727.03	5461.04	5539.14	5208.17	5125.36	5385.8	5096.98	5229.56	5440.55	5477.56	5929.87
1447931_at	Whsc1l1	Wolf-Hirschhorn syndrome candidate 1-like 1 (human)	0.00950545	0.00241	10.66	859.12	203.5	715.02	832.64	704.33	860.08	773.85	989.79	1088.83	1013.03	874.28	844.04	737.88	858.15	726.36	889	990.07	892.78	900.42	935.53	920.85	966.75	851.07	823.56	722.07	681.83
1447936_at	---	---	0.000276902	0.000532	9.67	836.46	318.89	834.99	628.54	639.35	727.07	855.54	1023.24	846.97	1181.95	996.67	944.88	825.01	544.17	792.49	596.35	587.19	628.6	914.22	832.61	857.36	890.89	964.81	932.27	837.92	807.13
1447977_x_at	3100002L24Rik /// OTTMUSG00000016609 /// OTTMUSG00000016611	RIKEN cDNA 3100002L24 gene /// predicted gene, OTTMUSG00000016609 /// predicted gene, OTTMUSG00000016611	0.000586073	0.00219	19.96	564.12	173.85	541.9	689.75	657.96	556.5	594.19	401.71	429.9	471.93	539.58	554.64	644.15	691.01	749.41	592.1	704.77	571.74	498.8	594.87	490.53	516.54	523.45	541.15	639.91	598.34
1448083_at	LOC675405 /// Nalcn	similar to voltage gated channel like 1 /// sodium leak channel, non-selective	0.00723311	0.0182	2.62	3763.58	1328	3352.82	4257.49	3983.93	4326.94	4277.55	3862.5	4499.65	3424.89	3391.49	3442.59	3170.49	3717.3	5419.62	4672.12	5604.81	4579.54	3993.21	3809.86	3382.69	3591.76	3587.39	3238.19	3329.69	2948.82
1448117_at	Kitl	kit ligand	0.00687473	0.0215	16.85	102.62	76.31	104.93	146.19	103.42	133.5	101.82	105.06	93.21	48.25	107.78	123.21	109.64	145.86	81.75	197.84	200.87	146.86	82	79.9	66.75	59.61	62.29	67.81	73.33	99.57
1448128_at	Ctsa	cathepsin A	0.00204243	0.00463	8.86	1080.49	245.17	1028.74	1002.88	940.25	984.82	1081.13	1222.65	1279.54	1325.48	1214.09	1159.97	1006.38	899.46	1065.41	1087.59	1021.05	960.04	1149.81	1145.68	1120.54	1079.85	1209.96	1389.8	1065.83	1001.76
1448130_at	Fdft1	farnesyl diphosphate farnesyl transferase 1	0.0357516	0.00509	18	2081.35	636.71	2366.11	2243.33	2329.94	1562.66	1704.3	1696.66	1372.16	2097.63	2014.42	2163.27	2106.01	1956.76	2645.59	2342.14	2229.99	2015.64	2103.05	1927.69	2024.3	2019.37	2003.3	2141	2065.08	2201.72
1448144_at	Hnrnpab	heterogeneous nuclear ribonucleoprotein A/B	0.049365	0.00446	14.83	344.79	87.2	402.39	356.39	340.94	355.75	273.66	308.24	348.65	349.36	330.48	362.74	356.54	442.27	448.06	383.72	400.72	336.19	316.14	329.99	305.27	368.77	339.95	329.14	336.67	328.04
1448151_at	Elavl1	ELAV (embryonic lethal, abnormal vision, Drosophila)-like 1 (Hu antigen R)	0.00532098	0.0109	20.47	275.73	85.97	307.98	308.56	280.67	341.13	266.58	242.93	257.89	275.47	233.35	264.43	272.78	402.72	276.5	354.29	294.8	317.19	275.99	257.62	252.7	238.47	230.78	259.2	285.54	314.52
1448161_a_at	Clcn4-2	chloride channel 4-2	0.0098663	0.00243	6.3	2366.48	491.49	2228.46	2231.53	2449.63	2399.26	2306.14	2687.28	2947.76	2373.85	2483.1	2463.94	2359.11	2464.98	1964.77	2136.84	2083.27	2240.71	2289.24	2416.93	2596.24	2535.87	2309.96	2406.91	2254.19	2296.47
1448178_a_at	Cct3	chaperonin containing Tcp1, subunit 3 (gamma)	7.31e-05	0.00165	20.41	5598.43	1104.28	6123.26	5678.14	5948.13	5900.5	5561.62	5270.17	4851.21	4771.66	5380.7	5331.34	5970.63	6980.23	5860.85	6208.85	5635.23	5783.6	5514.87	5500.52	5378.81	5243.89	5274.2	5520.06	5822.68	6212.86
1448180_a_at	Hn1	hematological and neurological expressed sequence 1	0.000433826	0.00417	18.84	1574.99	321.21	1960.75	1723.81	1550.78	1658.72	1575.63	1589.52	1574.35	1509.3	1484.47	1358.48	1463.91	1748.46	1813.97	1807.65	1667.89	1981.93	1764.05	1520.99	1414.11	1380.5	1339.51	1488.45	1387.64	1609.71
1448181_at	Klf15	Kruppel-like factor 15	3.02e-09	0.000175	15.24	337.97	86.97	324.9	356.47	284.79	266.15	285.03	313.94	338.67	352.42	380.01	426.25	395.26	337.27	320.44	301.43	264.66	252.31	282.61	295.46	354.54	372.35	365.32	394.94	395.58	360.03
1448185_at	Herpud1	homocysteine-inducible, endoplasmic reticulum stress-inducible, ubiquitin-like domain member 1	0.00986314	0.00243	6.9	1340.72	508.11	1391.71	1179.61	1148.18	1235.13	1339.11	1448.34	2049.67	1501.93	1444.77	1441.24	1493.88	1313.85	1342.34	1155.87	1043.34	1033.45	1215.3	1173.2	1289.76	1426.32	1369.13	1520.06	1422.11	1302.9
1448236_at	Rdx	radixin	0.0393653	0.0104	17.73	1772.59	392.67	1840.45	1878.66	1707.83	1806.69	1680.02	1677.09	1840.81	1777.08	1576.02	1645.2	1708.96	1992.21	2361.36	2077.18	2051.88	1741.96	1738	1722.64	1641.91	1715.31	1768.1	1809.01	1804.62	1813.56
1448243_at	Napa	N-ethylmaleimide sensitive fusion protein attachment protein alpha	0.00120588	0.00491	12.5	1590.3	381.07	1663.97	1308.66	1397.87	1344.65	1501.01	1610.02	1571.35	1760.96	1713.35	1683.73	1550.66	1196.03	1487.57	1300.3	1091.78	1254.45	1678.33	1688.03	1808.34	1596.56	1853.92	1812.28	1584.05	1624.41
1448248_at	Crk	v-crk sarcoma virus CT10 oncogene homolog (avian)	0.00935831	0.0356	22.01	2207.93	382.15	2516.86	2566.9	2668.91	2426.7	2279.35	2115.92	1904.62	2135.94	2125.84	2231.2	2308.8	2166.08	2576.45	2105.74	2265.93	2175.9	2120.7	2231.47	2045.35	2210.24	1959.28	2203.39	2205.62	2267.79
1448263_a_at	Cndp2	CNDP dipeptidase 2 (metallopeptidase M20 family)	0.000193041	0.0119	16.26	1591.44	314.48	1646.6	1478.64	1377.18	1230.64	1239.22	1411.8	1599.22	1736.7	1686.07	1725.93	1583.66	1784.57	1490.13	1537.36	1436.15	1368.98	1542.82	1415.66	1859.61	1810	1630.46	1745.42	1674.45	1792.11
1448273_at	Gss	glutathione synthetase	0.0289147	0.045	19.04	118.11	20.5	139.8	118.17	119.09	145.51	121.84	118.36	105.82	117.56	116.84	117.6	126.19	123.32	138.73	146.82	130.03	118.05	109.15	116.46	107.53	115.28	110.21	118.21	107.33	117.92
1448276_at	Tspan4	tetraspanin 4	0.0195246	0.0356	15.32	290.39	174.12	311.88	228.25	238.98	256.23	234.9	286.56	152.17	311.82	344.27	392.56	324.97	207.71	175.04	156.71	105.2	138.62	273.74	337.43	294.22	318.55	351.44	453.45	349.42	374.57
1448280_at	Syp	synaptophysin	0.00424355	0.00977	13.97	1415.05	204.9	1508.65	1365.82	1416.42	1323.14	1378.54	1404.14	1628.59	1431.98	1471.12	1533.26	1414.6	1308.77	1360.43	1335.81	1331.99	1230.72	1406.19	1415.05	1554.39	1553.22	1561.65	1640.51	1430.96	1415.06
1448286_at	Hsd17b10	hydroxysteroid (17-beta) dehydrogenase 10	0.0421009	0.00897	17.426	805.4	228.49	1027.31	798.38	787.46	865.34	807	803.8	784.78	793.68	767.84	740.14	748.61	833.12	1197.11	1053.81	1018.05	837.07	933	810.17	761.39	761.26	767.16	855.43	746.37	840.01
1448316_at	Cmtm3 /// LOC100046883	CKLF-like MARVEL transmembrane domain containing 3 /// similar to CKLF-like MARVEL transmembrane domain containing 3	0.00245638	0.00171	10.86	211.2	55.53	219.71	182.27	187.46	210.88	210.66	241.32	199.16	239.4	235.09	240.21	251.85	168.25	140.79	151.37	159.74	182.89	209.88	211.52	243.47	233.95	212	245.94	213.41	204.28
1448347_a_at	Caprin1	cell cycle associated protein 1	0.000239873	0.00653	22.6	5146.25	1169.87	5151.54	5692.46	5600	5762.69	5375.42	5008.9	5062.53	4886.57	4779.97	4696.58	5438.65	6667.19	5912.17	5614.04	5585.44	5363.48	5109.6	5113.58	4327.45	4401.73	4691.98	4556.75	5140.96	5441.73
1448359_a_at	Higd1a	HIG1 domain family, member 1A	0.00899388	0.000593	16.31	896.37	237.16	953.82	937.89	890.79	819.57	766.39	800.91	795.61	943.4	850.23	868.02	900.76	1012.46	1240.71	1091.16	1082.16	896.58	947.57	851.74	896.15	856.13	785.23	842.33	974.9	1000.31
1448383_at	Mmp14	matrix metallopeptidase 14 (membrane-inserted)	8.09e-09	0.000449	4.8	288.53	142.89	253.66	343.48	357.83	422.63	450.55	426.06	441.87	296.04	254.74	199.29	204.39	262.38	216.25	285.72	315.56	359.59	386.61	426.69	289.64	287.43	238.22	222.82	164.76	194.92
1448385_at	Slc15a4	solute carrier family 15, member 4	0.00626259	0.0049	19.79	423.42	108.79	548.35	479.19	484.07	484.93	359.73	330.77	338.94	409.59	422.12	424.72	519.76	434.04	429.02	384.51	401.21	389.07	376.77	343.45	456.28	372.66	370.53	437.55	501.76	510.76
1448414_at	Rad1	RAD1 homolog (S. pombe)	0.000414452	0.00198	19.24	285.04	64.68	355.82	317.03	296.39	302.9	272.24	239.49	258.04	256.16	284.18	280.17	300.68	343.23	304.1	304.12	329.34	298.27	265.44	229.73	278.05	285.31	264.37	234.23	284.77	359.1
1448454_at	Sfrs6	splicing factor, arginine/serine-rich 6	0.0376398	0.0121	23.88	1840.73	758.64	1843.87	1871.49	1767.64	1956.97	1817.68	1724	1911.55	1533.58	1451.47	1546.84	1897.78	1837.58	2968.74	2286.38	1958.85	2337.35	2062.19	1799.87	1631.24	1738.14	1695.47	1776.67	2104.91	2070.16
1448478_at	Med20	mediator complex subunit 20	9.38e-05	0.00036	18	353.23	129.74	458.79	378.6	361.23	311.19	291.25	271.73	273.37	294.42	306.95	339.32	392.33	404.14	531.2	489.68	395.42	345.92	336.58	326.25	365.28	360.55	308.2	310.11	400.06	441.18
1448484_at	Amd-ps3 /// Amd1 /// Amd2	S-adenosylmethionine decarboxylase, pseudogene 3 /// S-adenosylmethionine decarboxylase 1 /// S-adenosylmethionine decarboxylase 2	0.00277124	0.00319	21.35	4144.91	1078.27	4341.54	4559.45	4457.3	4430.63	3804.33	3307.83	4108.54	3087.23	3369.14	3561.89	4422.32	5243.77	4181.28	4772.1	4459.55	4810.86	3616.33	3949.24	3996.6	4095.71	3768.6	3693.93	4483	4647.25
1448486_at	Mut	methylmalonyl-Coenzyme A mutase	0.00897262	0.0124	1.92	1335.59	244.89	1348.09	1417.01	1373.98	1378.09	1393.56	1376.63	1525.32	1270.89	1198.95	1201.2	1204.87	1423.48	1627.81	1688.73	1656.35	1530.12	1323.09	1308.45	1301.06	1306.64	1255.72	1294.39	1274.28	1266.99
1448487_at	Lrrfip1	leucine rich repeat (in FLII) interacting protein 1	0.00701776	0.0248	17.704	159.72	59.05	192.8	155.48	153.89	156.11	127.72	137.49	151.06	115.26	146.2	143.05	153.92	216.39	193.53	210.55	160.52	233.35	192.96	180.84	204.6	188.72	157.04	158.93	195.29	197.16
1448517_at	Timm22	translocase of inner mitochondrial membrane 22 homolog (yeast)	0.000425847	0.000781	18.248	364.56	75.4	427.4	401.37	346.35	366.93	353.52	334.37	316.98	364.26	364.52	387.65	380.84	361.81	437.11	406.05	405.26	327	323.44	323.07	344.62	286.3	364.6	367.59	374.18	393.75
1448525_a_at	Bnip3l	BCL2/adenovirus E1B interacting protein 3-like	0.00996437	0.00969	0.67	786.85	112.11	782.14	901.7	866.19	891.16	794.69	796.07	867.9	766.94	677.47	682.09	692.75	757.37	712.37	797.57	786.48	869.37	753.62	864.14	822.14	807.02	678.85	787.23	699.39	749.77
1448536_at	Lsm3	LSM3 homolog, U6 small nuclear RNA associated (S. cerevisiae)	0.0463329	0.00452	14.93	1102.21	168.63	1294.74	1046.05	1015.3	968.71	957.48	1051.21	1091.38	1129.62	1053.48	1115.09	1106.56	1266.76	1257.06	1189.65	1098.89	1105.52	1107.87	1017.22	1116.59	1020.23	1064.48	1138.45	1070.21	1205.12
1448548_at	Tulp4	tubby like protein 4	9.01e-06	0.000891	6.1	4122.83	999.26	3866.37	4059.96	3846.07	4556.61	4519.15	4441.54	5231	4187.72	3917.01	3800.62	3487.02	3720.05	3473.62	3919.85	4185.7	4254.81	4293.49	4528.75	4315.85	4502.21	4366.31	3519.33	3836.21	3232.48
1448551_a_at	Trim2	tripartite motif-containing 2	0.0012705	0.00481	21.38	979.65	216.16	1049.93	1189.52	1152.22	1042.29	1038.13	823.61	864.49	757.2	871.27	913.04	982.3	998.55	977.97	981.33	1114.57	1048.78	901.92	987.32	1045.24	927.75	848.99	930.21	911.72	969.45
1448552_s_at	Tmem206	transmembrane protein 206	0.0271227	0.00743	16.05	200.64	65.96	279.29	219.57	189.36	233.11	177	162.64	172.86	200.39	237.98	182.53	213.59	239.77	291.49	230.59	215.55	204.39	181.94	160.45	200.9	162.58	176.4	159.57	175.11	204.22
1448555_at	Rpap3	RNA polymerase II associated protein 3	8.4e-05	0.00141	5.9	802.09	145.51	706.69	663.42	792.35	815.26	811.84	739.75	816.7	839.77	900.93	829.92	812.53	631.61	659.53	656.75	683.9	722.65	757.4	842.24	868.53	922.63	833.09	874.83	741.36	763.53
1448609_at	Tst	thiosulfate sulfurtransferase, mitochondrial	0.00428463	0.000967	9.95	426.15	155.83	432.53	398.58	393.92	419.28	428	516.92	476.28	648.89	531.16	474.66	424.31	359.18	429.19	337.23	337.87	343.99	424.31	436.34	418.92	438.45	467.56	477.87	365.08	387.35
1448626_at	Cdk5rap1	CDK5 regulatory subunit associated protein 1	0.0329324	0.00672	20.92	210.91	64.7	225.23	206.68	236.53	247.55	189.91	156.46	205.93	170.61	210.68	166.7	192.23	211.63	236.49	284.82	254.11	238.65	212.19	267.33	155.42	214.5	190.78	175.36	208.17	211.15
1448635_at	Smc2	structural maintenance of chromosomes 2	0.0435035	0.0322	18.518	396.64	101.37	410.82	384.65	464.99	457.41	365.14	276.79	339.92	321.26	394.43	401.31	468.6	479.54	407.7	414.54	399.62	413.51	367.84	421.69	359.72	334.55	357.5	381.11	398.86	376.28
1448640_at	Slc14a1	solute carrier family 14 (urea transporter), member 1	0.00331312	0.000485	10.77	173.62	65.78	174.16	190.02	171.01	175.41	173.09	191.31	180.18	234.26	224.43	203.94	172.23	161.67	116.55	102.7	117.81	144.52	153.98	176.53	172.23	205.68	215.52	201.98	162.91	152.25
1448651_at	Nudt5	nudix (nucleoside diphosphate linked moiety X)-type motif 5	0.0198757	0.0071	15.51	184.29	43.99	198.88	192.75	188.87	184.8	205.35	161.8	192.08	174.5	178.48	178.67	219.14	239.39	239.96	187.8	212.28	182.11	181.16	151.99	166.15	154.8	157.41	183.78	185.17	182.75
1448654_at	Mtch2	mitochondrial carrier homolog 2 (C. elegans)	7.27e-11	0.000185	11.62	977.03	202.5	901.17	880.37	886.9	966.13	949.02	991.14	1168.69	1161.79	1130.07	1108.67	1020.22	894.57	830.04	833	852.95	923.83	955.08	1084.12	1235.03	1218.22	1110.47	1040.52	987.93	935.16
1448657_a_at	Dnajb2	DnaJ (Hsp40) homolog, subfamily B, member 2	0.0457924	0.00749	16.87	2470.26	638.93	2677.56	2375.15	2427.13	2532.71	2450.91	2450.89	2649.62	2469.78	2086.08	2147.98	2415.91	3032.5	3363.94	3102.98	2666.54	2799.97	2584.6	2392.37	2470.74	2257.12	2273.7	2251.43	2559.45	2720.45
1448670_at	LOC100047012 /// Ube2e3	similar to ubiquitin-conjugating enzyme UbcM2 /// ubiquitin-conjugating enzyme E2E 3, UBC4/5 homolog (yeast)	0.00164477	0.00349	17.476	5188.53	858.72	5730.31	5495.57	5249.08	5384.3	5156.05	5168.43	4658.28	5206.23	5081.1	4990.55	5685.79	6375.73	5261.02	5667.23	5331.79	5366.24	5038.26	4866	4897.29	4672.05	4891.1	5170.83	5136.75	5304.06
1448674_at	Rnf25	ring finger protein 25	0.00912366	0.0114	8.53	908.79	246.53	927.63	799.49	719.87	765.38	838.91	1007.03	951.24	1076.2	1028.08	985.07	838.82	618.97	903.95	722.96	754.74	793.89	963.56	913.64	884.67	879.09	1112.04	1020.98	1027.53	914.37
1448678_at	Fam118a	family with sequence similarity 118, member A	0.012015	0.0102	10.04	590.29	113.87	580.43	573.83	630.66	632.98	610.58	606.19	769.3	718.04	561.03	591.55	559.09	555.41	548.75	571.45	589.5	719.06	640.76	591.09	650.1	659.09	575.68	549.2	541.56	586.38
1448682_at	Dynll1	dynein light chain LC8-type 1	0.00185281	0.00322	19.47	8279.8	2225.54	10276.1	8909.28	8684.72	8281.8	8267.64	7824.03	7086.49	7851	7501.82	7973.8	8733.47	9798.97	11513.9	8912.57	7182.49	8375.8	9147.14	7851.89	8111.92	7062.76	7725.01	8277.79	9028.77	9995.45
1448688_at	Podxl	podocalyxin-like	0.0143181	0.00619	6.4	167.55	56.66	130.12	167.07	171.7	132.02	193.55	197.73	177.13	195.61	172.47	135.82	152.92	128.2	140.72	168.03	163.56	132.71	165.06	208.17	241.52	190.33	184.66	225.3	147.23	147.18
1448694_at	Jun	Jun oncogene	0.0317718	0.00683	4.5	695.01	227.03	629.85	605.26	691.35	706.87	737.57	827.55	673.33	756.58	749.75	957.21	616.31	518.61	503.16	537.56	520.16	598.6	771.02	701.43	736.82	663.05	698.66	770.51	751.97	669.16
1448714_at	Rngtt	RNA guanylyltransferase and 5'-phosphatase	0.000169526	0.000941	20.1	179.82	58.54	189.66	198.75	236.21	194.81	175.75	142.51	178.21	151.24	143.9	142.08	181.42	248.42	249.2	213.06	253.17	215.19	174.65	183.11	179.59	163.7	136.08	138.96	180.05	177.77
1448753_at	Srp9	signal recognition particle 9	0.00187653	0.000602	16.9	4342.3	672.04	5368.14	4573.13	4271.38	4414	4061.34	4116.86	4024.05	4279.38	4274.85	4379.96	4555.69	5085.2	4858.24	5012.66	4680.07	4291.83	4451.16	4115.17	4478.51	4193.37	4161.77	4304.64	4143.06	4510.31
1448787_at	LOC100233175 /// Moap1	hypothetical protein LOC100233175 /// modulator of apoptosis 1	0.0355324	0.0177	12.82	2355.18	255.9	2452.13	2317.19	2303.86	2358.81	2270.4	2420.9	2521.74	2377.96	2493.56	2323.35	2242.18	2128.84	2363.45	2202.41	2162.64	2357.12	2346.18	2377.77	2640.64	2512.99	2353.23	2380.84	2277.77	2284.67
1448810_at	Gne	glucosamine	0.0160185	0.00681	18	184.47	49.23	236.23	184.02	184.93	189.12	164.65	156.65	137.78	210.9	218.66	195.18	202	179.49	173.88	150.01	153.14	138.62	182.85	164.62	181.74	185.93	226.05	211.96	217.75	227.27
1448818_at	Wnt5a	wingless-related MMTV integration site 5A	0.000603172	0.00841	7.3	108	137.03	96.86	75.42	81.05	115.63	174.76	248.65	322.38	141.37	113.59	104.88	73.11	75.62	77.04	48.31	97.75	139.77	111.93	111.11	98.49	118.96	121.57	119.28	57.27	52.74
1448823_at	Cxcl12	chemokine (C-X-C motif) ligand 12	0.000153774	0.00178	15.6	232.09	436.27	318.95	382.85	262.29	246.64	212.81	217.53	286.74	103.51	84.07	87.67	164.26	828.93	651.74	881.88	936.54	552.18	273.64	135.21	92.12	76.53	63.99	283.87	124.21	197.27
1448828_at	Smc6	structural maintenance of chromosomes 6	0.00472561	0.0024	16.96	593.71	116.77	658.29	607.28	621.17	587.1	586.93	542.61	558.76	566.65	601.06	566.67	690.43	729.77	645.7	670.39	565.4	639.71	573.32	496.23	585.13	600.33	584.07	538.1	640.4	630.81
1448830_at	Dusp1	dual specificity phosphatase 1	1.24e-07	0.000934	8.94	721.83	876.96	463.85	484.25	636.96	1155.72	1205.38	1474.99	2158.01	1014.81	762.97	668.81	452.59	546.05	530.99	521.1	706.08	1450.99	1184.69	997.37	933.83	873.32	737.57	686.62	435.93	404.09
1448835_at	E2f6	E2F transcription factor 6	0.000169199	0.000698	16.29	828.03	149.52	852.9	868.75	853.96	846.18	809.36	707.12	818.15	825.41	766.44	765.47	863.96	977.08	938.07	962.87	950.92	933.16	846.16	724.26	723.71	726.55	678.03	741.22	824.21	830.65
1448853_at	Synj2bp	synaptojanin 2 binding protein	0.00331806	0.00284	15.64	2334.08	257.17	2400.03	2361.85	2339.68	2426.28	2281.39	2258.91	2226.58	2308.68	2334.09	2541.18	2708.57	2664.85	2286.36	2442.33	2334.07	2364.1	2256.95	2194.24	2258.67	2312.68	2255.04	2312.01	2494.73	2562.41
1448884_at	Gtf2e2	general transcription factor II E, polypeptide 2 (beta subunit)	1.09e-06	0.000256	19.73	736.74	181.65	955.93	756.91	863.93	809.32	705.02	594.71	654.32	592.63	652.44	694.13	850.86	890.56	924.75	808.79	807.03	785.61	716.58	643.63	651.14	702.09	640.74	645.01	779.59	837.86
1448887_x_at	Fxc1	fractured callus expressed transcript 1	0.00383024	0.00405	10.56	903.52	209.81	880.05	792.76	833	815.91	836.97	1017.51	803.69	1102.9	1024.33	1014.42	981.48	698.1	875.17	761.99	684.14	683.27	910.87	922.17	907.57	899.46	959.45	1028.8	930.81	933.41
1448896_at	Pigf	phosphatidylinositol glycan anchor biosynthesis, class F	0.0271256	0.0175	18.247	499.07	112.13	629.55	498.19	526.87	522.88	461.61	433.44	491.08	523.94	485.7	490.42	539.89	572.24	508.17	462	523.12	534.41	499.96	436.94	405.29	494.88	455.22	493.64	531.67	540.13
1448917_at	Med30	mediator complex subunit 30	0.00895636	0.0104	9.91	1513.98	146.75	1529.57	1543.39	1517.57	1532.2	1462.77	1652.93	1633.27	1596.25	1578.8	1647.35	1598.31	1537.01	1486.02	1463.27	1500.49	1359.43	1493.6	1419.22	1464.07	1524.89	1510.39	1499.8	1482.46	1438.71
1448922_at	Dusp19	dual specificity phosphatase 19	0.000214377	0.0021	20.41	134.4	41.08	188.84	166.01	183.59	152.96	138.95	118.78	129.71	120.34	135.02	112.35	170.85	161.49	174.72	133.31	175.19	133.78	133.41	128.87	107.81	118.75	106.68	143.59	132.05	153.84
1448927_at	Kcnn2	potassium intermediate/small conductance calcium-activated channel, subfamily N, member 2	0.00309749	0.00154	15.51	340.43	62.11	359.06	316.12	355.53	276.36	284.13	308.14	306.7	349.84	364.32	381.77	375.29	376.35	374.65	327.98	363.3	265.58	299.19	257.55	343.79	349.48	324.51	331.16	376.5	337.06
1448946_at	Kif3c	kinesin family member 3C	0.00937753	0.00352	20.48	524.33	88.03	580.88	524.37	538.52	502.56	488.62	478.6	434.38	484.29	477.53	465.28	525.5	532.19	607.77	576.41	521.69	581.81	539.01	478.58	546.32	524.28	495.23	521.92	533.51	610.43
1448949_at	Car4	carbonic anhydrase 4	0.025202	0.0248	8.89	143.21	72.84	157.62	142.43	135.83	150.49	145.26	232.62	158.22	189.7	141.42	102.25	86.94	136.9	168.01	169.78	120.66	142.43	212.52	197.89	172.14	112.09	143.99	95.27	110.19	112.19
1448960_at	Cxxc5	CXXC finger 5	0.0291115	0.013	3.73	1402.52	231.44	1475.94	1445.1	1272.58	1507.99	1356.34	1505.69	1621.41	1359.95	1219.76	1158.53	1248.96	1489.18	1555.56	1585.67	1599.86	1520.02	1506.08	1348.67	1355.55	1261.16	1279.31	1287.15	1287.28	1481.81
1449001_at	Ivd	isovaleryl coenzyme A dehydrogenase	0.00110755	0.0023	17.718	919.56	338.12	1045.13	964.42	1011.15	923.11	911.24	916.01	990.47	886.9	755.65	771.58	873.3	1061.81	1431.88	1338.5	1278.21	1061.59	995.52	866.79	792.96	867.13	831.15	830.64	912.12	940.63
1449007_at	Btg3 /// EG654432 /// LOC100048453	B-cell translocation gene 3 /// predicted gene, EG654432 /// similar to BTG3	8.39e-05	0.000232	7.9	1084.44	306.66	977.73	1052.72	941.82	1074.97	1099.16	1226.52	1392.4	1438.87	1212.42	1134.06	1044.35	1085.83	825.56	881.08	928.45	1068.14	1139.62	1083.06	1089.2	1155.08	1216.03	1152.94	1078.4	1046.99
1449010_at	Hspa4l	heat shock protein 4 like	0.00285541	0.00349	22.41	2027.18	382.52	2140.16	2168.4	2331.09	2228.95	1934.1	1710.97	1872.65	1566.04	1588.21	1651.82	1982.13	2221.37	2310.6	2220.3	1782.07	2268.09	2105.58	2072.23	2135.35	1936.78	1572.1	1770.32	1950.25	2228.78
1449025_at	Ifit3	interferon-induced protein with tetratricopeptide repeats 3	1.23e-06	0.000778	17.331	231.78	127.84	271.1	217.02	178.32	142.43	108.57	148.7	172.13	259.72	282.54	298.21	247.12	245.1	255.76	218.71	171.44	135.51	141.24	133.46	140.97	357.58	244.84	364.24	281.93	271.03
1449037_at	Crem	cAMP responsive element modulator	0.000444023	0.00353	9.73	143.06	94.38	130.97	133.5	131.9	188.44	228.9	231.81	290.33	167.56	147.99	114.66	145.16	125.04	141.16	141.18	131.35	179.39	195.45	177.58	133.9	146.96	144.95	116.03	101.56	121.05
1449039_a_at	Hnrpdl	heterogeneous nuclear ribonucleoprotein D-like	0.00235344	0.0176	13.16	1727.57	512.32	1548.16	1362.59	1394.86	1231.12	1363.64	1620.7	1964.61	2097.09	1929.32	2057.2	1573.59	1171.31	1686.83	1604.49	1788.84	1537.26	1768.31	1856.06	1885.79	2195.95	1992.78	2042.82	1930.4	1591.04
1449040_a_at	Sephs2	selenophosphate synthetase 2	0.00504591	0.00378	9.42	837.35	188.97	703.19	856.4	838.5	763.66	768.53	867.53	1024.41	823.03	833.53	911.54	864.4	871.07	646.48	651.06	700.06	668.29	788.52	874.52	934.35	966.53	920.35	846.36	758.17	836.2
1449063_at	Sec22b	SEC22 vesicle trafficking protein homolog B (S. cerevisiae)	0.00873035	0.00233	16.05	710.68	154.26	883.62	758.98	694.75	687.6	695.02	687.88	745.01	736.1	678.79	692.35	738.01	851.66	926.33	805.28	793.81	708.36	712.99	641.1	654.3	639.3	617.81	719.86	650.33	736.74
1449065_at	Acot1 /// LOC100044830	acyl-CoA thioesterase 1 /// similar to acyl-CoA thioesterase	0.0109567	0.0296	4.8	626.39	241.51	482.2	727.48	668.25	683.53	801.07	618.18	934.89	584.08	546.52	482	451.88	713.09	488.28	634.61	691.51	828.44	705.32	671.68	504.99	638.96	609.26	545.73	492	513.24
1449072_a_at	N6amt2	N-6 adenine-specific DNA methyltransferase 2 (putative)	0.00797932	0.00187	14.99	723.17	164.22	802.65	691.19	712.68	710.62	718.78	741.54	751.85	714.84	669.16	727.56	812.53	926.82	802	798.53	747.21	699.54	730.72	646.09	610.91	598.39	682.25	682.63	776.32	842.73
1449080_at	Hdac2	histone deacetylase 2	0.000213831	0.00283	18.765	1866.99	743.59	2091.31	2122.46	2057.19	1925.44	1770.4	1533.45	1471.52	1659.99	1898.19	1815.46	1961.6	1915.17	2866.52	1925.34	1985.61	1865.19	1724.97	1825.22	1379.33	1642.32	1624.13	1718.78	1868.8	1887.7
1449085_at	Phf10	PHD finger protein 10	0.00258363	0.00169	22.85	416.31	76.53	451.73	454.77	446.13	454.6	375.13	422.22	387.05	389.8	344.74	379.79	405.24	442.87	442.12	497.8	416.81	472.48	403.81	370.99	406.82	415.8	387.17	357.36	439.59	485.15
1449096_at	Ccdc127	coiled-coil domain containing 127	0.00448309	0.00529	18.244	331.75	121.04	402.25	355.07	384.52	373.62	298.94	300.43	332.22	286.88	324.07	343.52	428.43	507.59	320.88	337.79	331.28	348.7	308.08	265.51	291.05	329.94	300.09	295.52	414.28	392.43
1449098_a_at	Poli	polymerase (DNA directed), iota	0.0150109	0.00236	16.86	115.47	58.84	130.91	111.61	126.63	106.12	103.49	106.43	100.98	88.04	109.76	111.77	118.34	122.43	205.72	152.73	149.19	146.17	122.93	109.67	113.19	117.74	106.52	106.16	124.85	129.01
1449100_at	Pard6a	par-6 (partitioning defective 6,) homolog alpha (C. elegans)	0.000221698	0.000458	6.2	337.09	102.94	347.31	300.01	291.37	325.82	420.12	428.56	411.96	409.67	403.04	345.87	289.31	236.54	222.67	224.18	252.47	286.89	392.42	355.92	337	347.53	337.19	339.77	289.36	288.42
1449106_at	Gpx3	glutathione peroxidase 3	0.0374087	0.0477	15	739.33	219.16	962.61	713.77	685.38	722.3	743.81	709.59	681.16	1033.82	858.89	780.44	735.56	710.82	866.91	605.59	595.51	640.5	730.05	716.25	768.78	743.09	982.96	932.57	826.75	929.76
1449121_at	Fusip1	FUS interacting protein (serine-arginine rich) 1	0.000271816	0.00169	19.02	703.42	399.57	720.1	864.12	816.3	838.4	612.1	501.41	649.52	510.33	560.63	594.87	845.25	1300.55	935.23	963.1	831.69	849.69	686.74	601.4	676.8	672.64	583.81	537.44	784.64	952.7
1449122_at	Ubxn2b	UBX domain protein 2B	0.00166878	0.00223	17.024	669.22	206.18	724.6	735.84	710.1	662.48	649.53	546.64	504.46	675.95	711.97	783.61	916.82	820.59	657.14	606.65	682.63	568.08	617.18	603.09	507.43	617.91	618.51	692.06	709.74	712.09
1449181_at	Fech	ferrochelatase	0.003115	0.000632	5.3	1157.1	232.39	1150.11	1065.14	1150.11	1225.95	1235.54	1228.9	1215.08	1233.04	1296.11	1222.11	1163.89	942.53	831.33	924.47	971.34	1039.6	1057.54	1295.93	1150.31	1220.45	1210.84	1187.38	1031.5	1057.62
1449187_at	Pdgfa	platelet derived growth factor, alpha	1.68e-07	0.000112	19.24	1716.55	784.02	2053.47	2245.54	2090	1709.74	1546.28	1341.08	1115.34	1354.22	1622.77	1723.36	2318.43	2683.38	2291.52	2549.6	2257.18	1740.34	1624.83	1605.88	1632.75	1634.05	1599.18	1668.11	2256.91	2144.61
1449211_at	Bpnt1	bisphosphate 3'-nucleotidase 1	0.0396486	0.0409	21.41	1168.72	269.76	1227.13	1291.71	1424.48	1270.57	1193.66	1103.73	947.1	1088.74	1215.46	1134.91	1378.93	1332.68	1151.82	1151.52	1150.57	1236.03	1156.15	1212.36	884.95	1102.03	1082.19	1158.92	1178.52	1291.55
1449294_at	Mrps15	mitochondrial ribosomal protein S15	0.0106542	0.00827	6.7	1110.47	234.61	1048.16	987.72	1020.14	967.54	1199.43	1252.77	1134.95	1370.46	1315.05	1263.9	1086	960.42	956.3	987.93	1026.06	901.23	1291.58	1208.93	1042.49	1064.07	1199.9	1353.08	1157.08	1184.42
1449303_at	Sesn3	Sestrin 3, mRNA (cDNA clone IMAGE:3481673)	0.0258205	0.0176	3.63	4401.22	629.1	4279.12	4597.24	4007.95	5053.47	4523.95	4354.19	4723.4	4555.89	3873.54	4115.25	3822.18	4424.33	4411.24	4804.49	4791.23	4800.2	4496.33	4190.89	4455.03	4391.19	4335.16	3795.27	4081.35	4098.74
1449322_at	EG546482 /// EG667723 /// LOC100044642 /// LOC100044742 /// OTTMUSG00000011595 /// OTTMUSG00000026290 /// Ptp4a1	predicted gene, EG546482 /// predicted gene, EG667723 /// similar to killer cell lectin-like receptor subfamily A member 2 /// similar to tyrosine phosphatase /// predicted gene, OTTMUSG00000011595 /// predicted gene, OTTMUSG00000026290 /// protein tyrosi	0.000293725	0.000935	5.5	4270.17	1762.06	4025	4326.23	4143.19	5054.24	5357	5715.91	6520.35	4953.9	4385.76	4078.57	4126.06	4004.92	2996.22	3139.06	3858.74	4421.05	4625.67	4912.59	4214.1	5092.56	4437.09	3850.65	3927.26	3782.17
1449333_at	Sf3a1	splicing factor 3a, subunit 1	0.0360504	0.00114	14.31	563.13	126.84	589.57	567.74	532.63	558.53	544.13	510.19	509.42	572.43	588.66	597.35	632.61	605.12	747.8	585.18	525.01	574.2	543.42	553.51	523.33	494.12	497.46	505.18	573.62	616.81
1449339_at	D10Ertd641e	DNA segment, Chr 10, ERATO Doi 641, expressed, mRNA (cDNA clone MGC:35747 IMAGE:3984181)	2.15e-05	0.000318	18	120.88	51.71	149.51	127.35	129.91	122.63	98.48	74.2	98.8	96.3	99.65	113.19	121.47	177.61	152.85	171.21	146.37	126.51	94.61	90.85	120.29	96.77	84.43	95.85	123.91	126.94
1449407_at	Ift81	intraflagellar transport 81 homolog (Chlamydomonas)	0.000210207	0.000246	16.55	158.88	71.99	209.55	188.49	156.24	185.52	135.99	123.79	163.24	124.37	144.17	143.24	165.58	227.46	267.46	267.76	225.79	234.3	161.52	153.82	131.61	136.75	135.33	136.53	162.19	150.05
1449438_at	Adnp /// Dpm1	activity-dependent neuroprotective protein /// dolichol-phosphate (beta-D) mannosyltransferase 1	1.47e-07	0.000779	11.57	1935.29	286.23	1819.36	1715.6	1769.42	1665.91	1847.44	1847.54	2205.75	2231.12	2022.9	2072.75	1982.47	1770.76	1920.08	1772.93	1658.66	1769.58	1950.51	1912.73	2045.72	2191.12	2179.37	2227.11	2053.37	1955.97
1449448_at	Med9	mediator of RNA polymerase II transcription, subunit 9 homolog (yeast)	5.26e-06	0.000286	18	358.27	139.24	465.01	436.25	356.42	377.32	350.37	336	281.71	350.08	360.12	343.29	411.45	508.47	416.87	529.21	452.94	349.55	375.58	307.52	298.7	250.74	341.86	339.15	369.91	458.5
1449523_at	Bcl7c	B-cell CLL/lymphoma 7C	0.00441247	0.00159	8.75	198.02	63.97	200.15	163.8	172.82	182.18	225.16	244.57	217.25	291.73	250.34	226.09	198.22	186	193.17	196.45	178.63	164.14	192.23	204.73	180.74	210.82	218.75	258.31	197.82	182.05
1449542_at	Pbx1	pre B-cell leukemia transcription factor 1	0.00287953	0.0017	15.38	140.69	105.21	160.66	166.69	150.22	166.81	102.71	100.73	179.19	106.16	109.32	108.53	154.94	297.43	269.53	231.99	247.39	176.88	114.78	88.57	105.83	124.03	88.86	87	141.17	140.21
1449623_at	Txnrd3	thioredoxin reductase 3	4.54e-05	0.00242	8.73	145.65	66.15	95.63	120.57	146.29	128.04	103.33	155.71	149.47	204.1	160.88	160.87	135.49	107.68	86.24	84.55	113.98	108.17	147.84	178.84	216.85	196.16	154.1	210.76	145.01	113.44
1449626_s_at	Acbd4	acyl-Coenzyme A binding domain containing 4	0.00620974	0.0348	9.19	460.13	101.22	397.63	371.81	398.81	388.22	449.73	477.01	554.68	468.22	467.1	489.85	399.42	393.08	486.37	437.39	435.57	484.06	421.15	457.31	574.25	510.53	502.1	518.94	462.95	438.05
1449660_s_at	Coro1c	coronin, actin binding protein 1C	0.0224673	0.00231	15.44	937.9	181.04	1006.07	957.46	853.95	799.96	802.22	795.46	826.18	929.87	937.01	934.47	1025.28	978.66	1157.54	1139.94	1076.55	921.07	969.74	922.26	933.91	938.79	921.63	961.73	1080.59	962.96
1449732_at	Zscan21	zinc finger and SCAN domain containing 21	0.01611	0.00751	11.33	544.46	258.16	470.85	439.49	440.41	481.72	527.52	578.98	909.29	698.59	585.41	519.7	465.46	555.96	399.86	566.8	592.2	607.88	515.18	544.06	619.93	556.56	544.86	546.98	463.27	392.97
1449734_s_at	Bbs4	Bardet-Biedl syndrome 4 (human)	0.00301727	0.000549	16.02	1812.49	426.11	1923.03	1910.56	1909.9	1740.47	1670.53	1480.98	1705.3	1677.55	1822.22	1974.07	1890.19	1827.72	2333.21	1989.5	2083.97	1950.6	1788.68	1740.13	1543.27	1768.96	1704.86	1723.72	1840.4	1802.76
1449815_a_at	Ssbp2	single-stranded DNA binding protein 2	0.019182	0.0151	19.7	2617.07	326.75	2851.45	2778.84	2659.46	2612.43	2545	2610.69	2573.45	2676.3	2553.13	2496.2	2516.97	2870.81	2977.46	3013.66	2850.27	2448.84	2570.01	2360.16	2678.65	2541.53	2571.59	2766.27	2621.71	2745.15
1449851_at	Per1	period homolog 1 (Drosophila)	8.7e-07	0.000854	7.6	448.59	564.37	233.89	242.57	224.38	438.18	657.87	813	1332.5	718.14	485.97	372.48	217.99	203.76	388.84	292.6	290.61	510.56	581.92	520.6	530.56	633.41	597.76	459	328.28	231.03
1449861_at	Nek4	NIMA (never in mitosis gene a)-related expressed kinase 4	0.0482629	0.01	15.38	338.51	76.94	339.44	367.62	337.14	345.76	296.91	279.35	411.38	291.51	326.71	334.07	344.81	389.49	433.23	398.59	416.13	399.35	320.98	294.79	281.81	338.01	302.17	296.82	339.01	348.53
1449863_a_at	Dlx5	distal-less homeobox 5	0.00559603	0.00449	15.16	164.82	107.61	175.57	186.67	164.33	166.55	165.31	139.63	180.96	152.01	143.17	170.51	179.53	246.57	327.7	213.72	244.94	146.78	151.35	121.86	112.48	141.35	141.72	142.54	187.25	161.18
1449968_s_at	Acot10 /// Acot9	acyl-CoA thioesterase 10 /// acyl-CoA thioesterase 9	0.0266351	0.0361	13.84	529.88	100.7	520.8	470.97	535.86	516.18	536.19	519.37	448.3	542.36	601.48	581.28	613.98	508.88	432.19	440.01	427.3	456.95	523.91	583.24	506.67	588.12	554.82	628.7	563.29	581.9
1450008_a_at	Ctnnb1	catenin (cadherin associated protein), beta 1	0.000371918	0.000781	18	2464.32	814.6	2597.31	2911.35	2740.84	2739.94	2258.46	2010.69	2519.78	1885.33	2046.12	2041.19	2244	2541.94	3096.83	3514.53	3308.21	3220.42	2438.28	2490.37	2284.96	2529.48	2226.42	2206.68	2094.58	2193.33
1450010_at	Hsd17b12	hydroxysteroid (17-beta) dehydrogenase 12	0.026841	0.00164	7.5	2008.91	558.77	1935.56	2172.67	1947.66	1767.41	2175.65	2242.29	2222.97	2233.68	2158.07	2207.62	2034.28	1669.8	1312.75	1571.65	1479.66	1866.8	1849.63	1886.63	2015.71	2114.27	2205.19	2430.29	1861.79	2002.11
1450011_at	Hsd17b12	hydroxysteroid (17-beta) dehydrogenase 12	0.000396858	0.000601	6.3	4831.54	1052.74	4367.94	4724.33	4387.81	4358.95	4703.03	5470.13	5285.89	5878.3	5149.17	5283.83	4823.16	4946.66	4839.93	4006.51	3772.83	4646.87	4662.24	4679.54	4978.27	4813.64	5317.06	5469.01	5018.61	5033.88
1450015_x_at	Sgpp1	sphingosine-1-phosphate phosphatase 1	0.00355232	0.00286	17.719	116.03	44.48	135.02	139.76	145.12	146.12	98.82	76.27	116.9	81.74	130.37	101.41	115.16	158.07	143.1	164.14	165.22	139	102.56	103.23	117.38	106.41	82.95	86.78	114.16	103.78
1450017_at	Ccng1	cyclin G1	1.69e-05	0.00154	21.36	166.45	71.72	189.44	207.81	213.75	207.13	168.27	141.1	162.55	131.01	154.8	153.58	169	200.45	274.45	229.29	202.27	174.6	156.65	157.27	161.16	151.39	164.64	158.16	158.37	185.85
1450129_a_at	Socs6	suppressor of cytokine signaling 6	0.000337163	0.00286	17.199	146.62	57.32	166.85	149.68	142.02	158.54	119.75	120.33	150.38	115.35	116.99	143.56	151.95	222.68	178.11	159.96	196.67	158.29	115.38	108.05	118.72	119.25	120.99	119.25	155.73	156.22
1450351_a_at	Clip1	CAP-GLY domain containing linker protein 1	0.00650575	0.00342	18.807	120.92	37.06	138.89	147.35	137.65	149.08	78.24	85.09	100.35	103.75	115.23	123.39	110.02	131.47	152.36	148.58	147.01	139.38	136.49	90.42	127.77	103.4	96.98	118.46	118.33	117.2
1450380_at	Epdr1	ependymin related protein 1 (zebrafish)	0.0203564	0.0319	21.23	2248.59	327.13	2444.64	2345.67	2301.48	2581.1	2303.48	2129.43	2377.07	2046.22	2056.5	1939.34	2144.68	2170.21	2593.6	2331.22	2135.3	2528.94	2254.37	2242.81	2392.7	2263.07	2095.82	2075.1	1988.48	2190.06
1450386_at	Kpna3	karyopherin (importin) alpha 3	0.000521074	0.000947	20.31	1572.28	261.82	1801	1744.55	1705.91	1733.56	1431.99	1321.39	1389.52	1386.55	1376.85	1446.33	1536.21	1828.38	1833.91	1592.33	1845.04	1812.45	1552.22	1494.95	1547.79	1651.78	1487.61	1509.49	1611.33	1594.4
1450389_s_at	Pip5k1b	phosphatidylinositol-4-phosphate 5-kinase, type 1 beta	0.0100485	0.00841	16.08	467.11	227.43	486.3	489.69	505.05	502.58	490.4	352.66	395.92	421.23	452.75	475.32	575.48	602.07	692.43	424.85	525.94	433.1	514.58	407.75	237.57	351.02	331	404.43	459.34	474.88
1450406_a_at	St3gal3	ST3 beta-galactoside alpha-2,3-sialyltransferase 3	0.00597619	0.00525	19.22	345.15	69.22	382.88	377.51	359.64	319.59	279.72	321.26	289.94	337.22	316.66	333.74	342.8	390.89	401.15	418.16	347.49	321.78	333.85	327.2	377.84	330.63	353.15	375.49	357.82	374.41
1450407_a_at	Anp32a	acidic (leucine-rich) nuclear phosphoprotein 32 family, member A	0.000937923	0.00267	18.524	2131.77	853.73	2661.06	2873.28	2243.9	2152.84	2008.61	1976.73	2051.86	2005.21	2148.23	1931.32	2132.72	2482.17	3515.35	2847.39	2313.99	2130.83	2119.66	2064.65	2086.95	1807.9	1939.69	2180.33	1879.92	2364.13
1450422_a_at	Kdelc1	KDEL (Lys-Asp-Glu-Leu) containing 1	0.0197256	0.0215	18.78	112.79	26.8	144.98	120.46	122.96	103.22	125.46	107.03	119.42	105.9	100.91	109.2	114.22	128.12	150.98	111.36	128.87	134.54	108.87	103	99.6	97.37	114.57	109.48	100.81	129.41
1450478_a_at	Ptpn12	protein tyrosine phosphatase, non-receptor type 12	0.0202422	0.00445	17.139	185.42	55.25	201.25	203.59	194.64	179.43	171.37	161.64	191.41	165.21	173.28	167.4	174.7	216.71	264.27	212.42	217.9	242.23	198.17	153.77	170.33	191.52	163.96	163.46	197.36	172.45
1450646_at	Cyp51	cytochrome P450, family 51	0.000593225	0.0011	19.72	1147.34	142.63	1201.96	1268.12	1270.04	1080.38	1053.28	1027.96	1045.58	1157.63	1093.75	1137.05	1183.91	1216.61	1178.3	1278.45	1313.21	1231.71	1060.28	1100.33	1049.46	1133.8	1132.94	1126.43	1292.63	1182.33
1450664_at	Gabpa	GA repeat binding protein, alpha	0.00784904	0.00876	17.723	820.83	287.04	814.91	865.91	848.37	970.58	806.49	794.09	844.84	720.28	671.62	736.33	852.65	1245.7	907.08	1051.95	1046.25	978.94	812.37	742.25	680.35	826.75	695.68	700.87	771.27	868.1
1450679_at	5730470L24Rik	RIKEN cDNA 5730470L24 gene	0.0276945	0.00842	16.46	101.92	28.39	111	102.93	114.69	100.79	96.38	84.59	117.92	97.15	101.53	108.17	108.78	131.72	100.61	115.05	102.21	105.46	87.93	83.7	74.94	75.97	103.12	96.87	122.68	101.63
1450712_at	Kcnj9	potassium inwardly-rectifying channel, subfamily J, member 9	0.0497805	0.015	14.53	310.62	123.4	345.67	386.48	323.44	297.78	301.27	309.79	384.51	256.18	311.46	346.59	350.02	427.79	363.92	421.58	435.39	332.82	248.31	197.67	249.54	188.59	279.04	262.97	268.9	279.32
1450720_at	Acp1	acid phosphatase 1, soluble	0.00239956	0.00626	7.3	3468.63	528.55	3065.79	3551.35	3288.53	2926.56	3482.86	3544.46	3323.96	3633.77	3654.8	3735.79	3333.9	2958.23	2819.5	2755.55	3130.17	3091.26	3562.79	3509.8	3812.65	3508.68	3667.52	3625.45	3367.38	3454.39
1450724_at	Fam126a	family with sequence similarity 126, member A	0.00515555	0.0114	19.98	303.36	71.66	388.23	340.09	319.07	337.22	281.3	244.91	279.64	288.72	294.64	254.51	315.9	370.4	313.74	313.08	307.89	373.94	281.9	273.4	298.82	281.47	276.4	271.23	343.47	330.48
1450746_at	Keap1	kelch-like ECH-associated protein 1	0.0222838	0.00514	15.3	714.15	105.25	771.58	724.92	707.28	742.48	681.39	690.9	720.76	709.54	744.61	728.18	719.4	813.58	782.11	718.76	797.02	670.32	635.44	637.97	603.08	673.47	681.29	670.04	671.96	758.68
1450770_at	3632451O06Rik	RIKEN cDNA 3632451O06 gene	5.01e-05	0.00107	17.136	1411.81	968.37	1893.02	1846.4	1833.85	1679.52	1516.03	1296.74	1499.41	1122.63	1165.29	1117.92	1376.68	2288.24	3054.66	2688.89	2816.13	1983.75	1446.94	1274.28	1263.46	1237.16	1170.19	1215.06	1221.67	1289.6
1450779_at	Fabp7	fatty acid binding protein 7, brain	2.42e-11	6.72e-05	6.1	5338.59	3959.28	3183.34	4466.78	5265.61	9131.51	8748.89	9809.65	9378.14	7708.8	5448.18	3922.35	2501.43	1891.09	2335.56	3614.17	4199.2	7363.22	7998.67	7965.91	7092.16	6422.16	5411.56	4090.21	2682.54	2581.4
1450794_at	Avp	arginine vasopressin	0.00013097	0.00134	9.84	15290	10976	10527.4	7742.66	7110.13	9579.13	16296.6	20993.1	29062.2	21147.5	17809.4	17918.6	13057.2	17440.9	13486.1	12089.4	10837.1	13018.5	15504.2	14547	15713.7	17389.7	19783.1	16156.9	15075.8	11503.2
1450849_at	Hnrnpu	heterogeneous nuclear ribonucleoprotein U	0.00185813	0.0101	19.33	1257.01	538.96	1376.59	1606.29	1463.57	1519.88	1285.97	1067.22	1420.43	977.75	1186.95	1210.12	1445.25	1476.92	1390.16	2055.67	1570.37	1517.53	1150.74	1083.64	1187.02	1213.94	1037.58	1175.74	1228.04	1134.7
1450874_at	Matr3	matrin 3	0.000377383	0.00444	20.4	8918.84	2366.75	9816.59	10826.9	10524.9	10308.6	9250.61	8141.58	8304.39	8413.24	8244.62	8217.66	8551.43	8952.5	12875.1	10247	9900.44	10816.3	8885.18	9304.46	8441.34	9284	8217.05	8576.12	8356.47	8597.5
1450881_s_at	Gpr137b	G protein-coupled receptor 137B	0.0452169	0.00872	5.2	644.12	149.61	586.92	648.44	661.03	643.76	644.47	624.95	653.93	719.3	647.48	639.88	577.19	614.73	482.5	583.89	630.13	633.07	614.38	637.5	781.72	759.69	714.45	690.5	670.88	651.88
1450889_at	Hltf	helicase-like transcription factor	0.000906042	0.0021	18.804	864.69	223.03	928.44	968.05	961.92	898.65	841.92	758.76	947.02	730.47	750.27	764.3	871.8	1176.54	1061.18	1089.46	1087.1	1084.16	774.57	784.05	838.68	857.58	761.72	771.72	856.03	909.59
1450908_at	Eif4e	eukaryotic translation initiation factor 4E	0.0158683	0.000503	18.598	2386.63	660.89	3048.78	2580.1	2715.53	2366	2211.97	1884.15	1915.52	1727	2094.96	1997.84	2335.51	2348.9	2940.63	2910.89	2492.23	2691.69	2411.42	2540.35	2458.74	2552.19	2374.72	2322.75	2185.24	2398.54
1450909_at	Eif4e	eukaryotic translation initiation factor 4E	0.0388286	0.0154	15.91	162.19	39.4	196.29	167.79	161.87	168.05	139.36	129.75	162.52	186.06	178.7	158.39	183.04	208.55	165.69	161.08	182.65	158.18	150.17	146.25	159.33	157.29	143.1	179.38	154.4	202.39
1450922_a_at	Tgfb2	transforming growth factor, beta 2	0.0302129	0.0123	6.7	198.06	98.69	184.94	188.16	190.88	230.32	252.45	210.56	219.7	341.92	258.18	203.88	184.43	149.12	183.94	144.54	153.54	216.74	188.58	252.28	185.78	196.02	263.79	214.67	171.64	200.11
1450923_at	Tgfb2	transforming growth factor, beta 2	0.0112837	0.00366	7	278.57	115.69	252.78	258.76	277.1	295.21	296.9	318.39	325.84	414.58	300.17	252.94	228.91	278.67	191.63	258.33	183.19	302.55	294.02	269.32	278.47	334.76	342.09	285.1	229.68	225.77
1450931_at	Dock9	dedicator of cytokinesis 9	0.0426509	0.021	20.98	347.1	128.68	335.25	375.05	422.81	417.95	349.37	293.5	250.27	301.32	322.85	344.84	349.42	411.41	463.14	380.97	507.64	339.97	284.87	370.94	322.98	355.87	330.59	339.02	352.98	314.2
1450932_s_at	Dock9	dedicator of cytokinesis 9	0.01454	0.000486	16.55	1135.12	373.55	1162.54	1283.03	1124.98	1042.43	1000.77	1066.82	884.62	1032.21	1047.69	1118.53	1113.93	1400.1	1513.23	1526.6	1631.72	1241.36	1212.84	1087.98	1175.17	1145.18	1125.06	1113.83	1227.07	1171.32
1450938_at	Pnn	pinin	0.0157758	0.00216	18.528	1112.19	312.44	1029.13	1124.23	1189.6	1091.79	1100.15	856.43	1008.08	836.6	1180.13	1065.91	1225.49	1243.89	1461.48	1447.63	1381.52	1288.32	1041.85	1253.29	914.58	1066.31	1028.86	1063.07	1342.27	1240.85
1450945_at	Prkca	protein kinase C, alpha	0.017366	0.00428	14.14	106.56	124.31	110.16	122.5	102.95	134.05	81.9	67.21	158.18	84.5	97.97	93.56	135.91	315.83	205.86	191.22	214.43	166.54	85.55	72.47	73.91	90.28	85.43	78.05	120.84	131.37
1450971_at	Gadd45b	growth arrest and DNA-damage-inducible 45 beta	0.00164466	0.000945	16.1	107.17	75.79	160.92	139.72	101.83	88.56	79.43	77.43	110.77	133.11	84.54	99.76	153.92	209.25	141.58	180.92	174.37	80.35	103.56	89.42	86.67	57.67	92.16	124.35	114.78	135.61
1450976_at	Ndrg1	N-myc downstream regulated gene 1	0.0384772	0.00735	13.8	1332.99	1772.26	1747.03	1624.8	1071.62	1091.76	1159.75	1354.46	1797.09	1350.65	1042.68	1037.59	1422.84	2909.36	4379.18	2723.34	2323.06	1411.17	1117.96	926.09	834.66	960.14	1159.39	1151.25	1319.12	1346.86
1450982_at	Slc9a3r1	solute carrier family 9 (sodium/hydrogen exchanger), member 3 regulator 1	0.00342203	0.00469	11.04	165.57	54.23	153.19	163.19	151.21	158.32	175.19	179.86	200.68	247.24	232.58	166.84	155.94	150.02	179.41	138.79	147.02	144.53	173.99	178.88	180.84	182.43	164.3	198.84	144.2	153.04
1450990_at	Gpc3	glypican 3	0.0421264	0.0463	9.6	454.76	486.29	416.01	497.71	440.62	583.49	553.44	628.08	1256.24	430.41	384.15	341.13	322.29	660.81	705.57	889.09	1059.91	924.15	584.02	464.66	423.29	444.86	390.42	321.63	297.64	283.67
1451004_at	Acvr2a	activin receptor IIA	0.00358505	0.00168	16.37	171.13	47.25	204.71	169.67	197.06	162.62	151.14	142.27	180.62	168.25	177.11	172.6	216.51	230.69	215.41	216.57	168.05	236.77	169.65	151.88	154.14	160.8	147.01	157.69	197.97	229
1451018_at	Leprotl1	leptin receptor overlapping transcript-like 1	0.00608549	0.00374	1.58	1939.02	255.54	1902.17	1932.71	2093.09	2124.65	1981.46	1868.71	2018.62	1795.46	1686.08	1817.33	1945.32	1927.86	1777.65	2197.16	2101.56	2069.05	1971.85	1955.08	1985.76	1985.97	1878.4	1764.08	1863.62	1931.76
1451019_at	Ctsf	cathepsin F	1.13e-06	0.000486	10.89	693.46	147.36	702.1	600.65	589.81	614.41	619.62	756.7	810.41	859.36	775.34	740.18	677.52	581.8	579.2	603.33	590.95	564.64	689	697.91	761.03	766.3	764.82	816.12	650.62	699.73
1451045_at	Syt13	synaptotagmin XIII	0.0190396	0.00101	4.9	187.59	105.29	191.47	164.56	190.72	184.8	201.07	212.09	275.01	190.93	217.47	201.35	156.54	151.73	64.43	112.23	117.08	144.2	165.16	203.71	190.39	215.59	183.55	192.95	149.03	158.75
1451063_at	Stxbp4	syntaxin binding protein 4	0.00416357	0.0195	20.05	461.85	151.43	472.07	576.18	460.56	525.93	482.77	426.97	485.38	412.74	419.51	431.99	487.19	522.59	659.57	482.94	561.83	561.46	463.15	406.48	356.71	447.16	435.26	429.27	425.91	452
1451121_a_at	Gltscr2	glioma tumor suppressor candidate region gene 2	0.00886731	0.0019	4.8	563.77	211.26	564.06	532.43	478.84	553.5	568.12	679.04	655.52	709.43	665.31	588.21	512.83	375.58	286.9	500.54	447.47	471.88	654.65	563.49	628.12	556.71	622.79	702.49	606.42	521.63
1451127_at	AW146242	expressed sequence AW146242	0.0122467	0.0193	17.728	926.41	519.99	1100.39	963.88	1052.52	1021.08	902.33	842.66	915.49	918.15	867.41	863.34	899.97	1056.74	1770.46	1150.96	1264.3	973.72	942.2	897.96	730.48	913.51	844.73	984.94	934.67	917.78
1451132_at	LOC100046056 /// Pbxip1	similar to Pre-B-cell leukemia transcription factor interacting protein 1 /// pre-B-cell leukemia transcription factor interacting protein 1	0.0043396	0.00541	8.2	732.45	469.76	615.86	581.35	526.95	617.98	725.19	987.89	1466.48	1195.69	796.33	850.77	676.67	828.09	757.56	591.14	654.01	680.88	728.64	628.39	736.26	807.54	936.48	870.13	783.85	706.79
1451140_s_at	Prkag2	protein kinase, AMP-activated, gamma 2 non-catalytic subunit	0.00026837	0.000215	15.98	793.69	573.26	996.26	1057.17	821.06	773.21	696.53	673.65	800.6	699.07	694.37	768.32	892.51	1517.31	1768.53	1625.41	1618.81	1124.47	866.34	729.07	622.01	670.34	729.33	729.4	786.78	968.81
1451149_at	Pgm1 /// Pgm2	phosphoglucomutase 1 /// phosphoglucomutase 2	0.00784749	0.0101	20.24	1590.46	505.11	1842.49	1607.65	1674.97	1513.18	1366.86	1364.23	1164.17	1491.2	1503.71	1591.8	1632.71	1589.13	2174.38	1687.43	1587.2	1361.16	1474.66	1461.31	1815.11	1545.73	1641.13	1738.3	1761.32	1932.04
1451216_at	Zfp330	zinc finger protein 330	0.00311175	0.00804	7.9	1549.03	229.99	1343.05	1345.04	1484.45	1604.18	1492.16	1537.24	1630.43	1643.7	1597.32	1613.27	1435.9	1495.33	1374.06	1530.35	1531.53	1560.81	1576.84	1803.02	1568.47	1673.22	1694.79	1752.83	1447.23	1404.66
1451217_a_at	Immp1l	IMP1 inner mitochondrial membrane peptidase-like (S. cerevisiae)	0.0318355	0.0036	14.6	2024.03	329.25	2368	1988.53	1952.59	2140.63	2044.19	2045.86	1804.44	2141.64	2008.96	2059.78	2177.25	2346.42	2364.26	2176.62	2112.09	1827.92	2039.09	1778.79	1766.11	1709.49	1734.18	1896.54	1937.81	1992.59
1451219_at	Ormdl1	ORM1-like 1 (S. cerevisiae)	0.00196125	0.000553	14.47	1332.45	951.67	1755.85	1630.38	1298.37	1325.34	1189.11	1259.45	1582.88	1277.64	1304.8	1351.38	1595.42	2813.22	2025.93	2250.85	2421.2	1625.52	1292.91	1053.91	909.89	999.88	1123.14	1148.03	1339.57	1515.28
1451230_a_at	Wbp5	WW domain binding protein 5	0.000426582	0.00283	9.38	13323.6	3223.09	13299.9	12045.9	12164.6	12862.7	13862.6	15457.6	18492.1	15332.4	13809.7	13154.2	12645.6	13110.5	12522.9	13015.6	12910.3	14144.4	13987.5	13347.4	15096.2	14800.6	14820.4	13700.3	13153.6	12974.2
1451237_s_at	Rbm7	RNA binding motif protein 7	0.0253917	0.0115	7.9	2584.58	394.53	2361.24	2361.41	2642.64	2736.8	2744.15	2858.67	3038.73	2997.25	2579.48	2589.69	2521.02	2648.24	2381.99	2369.25	2624.8	2629.13	2553.07	2633.02	2342.56	2793.47	2551.88	2536.18	2378.55	2249.67
1451243_at	Rnpep	arginyl aminopeptidase (aminopeptidase B)	9.48e-05	0.0028	17.181	322.53	209.1	397.08	368.21	351.95	356.11	313.05	280.83	316.33	273.71	289.72	288.17	338.72	434.7	640.68	399.31	378.07	345.12	320.64	300.13	260.4	222.48	265.83	277.43	324.43	346.51
1451271_a_at	Acat1	acetyl-Coenzyme A acetyltransferase 1	0.0128562	0.00824	20.04	3845.76	643.26	4396.69	3986.05	4255.16	3682.57	3875.22	3661.57	3554.44	3366.86	3922.57	3805.18	4096.6	4143.73	3984.73	3834.2	3448.27	3656.71	3648.76	3874.74	3110.18	3716.88	3545.59	3857.31	3934.38	4016.08
1451310_a_at	Ctsl	cathepsin L	0.00579567	0.0026	7.7	5190.04	1255.69	5199.22	5089.98	4826.52	5200.92	5071.32	5396.27	6544.93	5694.5	5673.81	5436.34	5333.65	5132.8	4033.55	4689.39	4922.32	5140.29	5169.8	5140.66	5180.86	5464.79	5679.19	5726.61	5027.82	5236.09
1451330_a_at	Inpp5b	inositol polyphosphate-5-phosphatase B	0.00409727	0.0233	15.91	627.28	180.87	638.82	536.64	547.43	536.21	575.44	526.71	537.17	549.47	582.54	587.37	595.94	609.3	888.46	844.06	722.9	702.37	638.03	647.3	715.02	648.54	621.17	633.38	730.72	667.21
1451352_s_at	Mta3	metastasis associated 3	0.000402049	0.00279	17.754	109.45	38.96	126.17	112.64	91.96	112.76	77.91	74.97	107.68	111.54	99.99	107.21	118.32	143.27	126.78	132.01	110.2	91.79	107.88	94.2	94.9	108.15	108.7	110.2	152.88	135.42
1451368_at	Alg1	asparagine-linked glycosylation 1 homolog (yeast, beta-1,4-mannosyltransferase)	0.00395388	0.0147	8	561.09	66.68	548.02	501.57	539.08	528.49	591.29	523.44	621.55	612.3	580.74	597.13	517.67	508.8	516.2	572.74	547.57	522.73	577.74	574.62	563.46	634.92	625.83	616.93	558.73	544.98
1451385_at	Fam162a	family with sequence similarity 162, member A	9.19e-05	0.000226	9.88	3014.52	563.97	3091.62	2553.9	2591.57	2591.46	2720.25	2995.95	3402.85	3489.32	3250.34	3618.47	3250.82	3492.22	3436.34	2656.19	2490.53	2496.52	2762.73	2529.07	2614.93	2758.19	3212.73	3462.41	3459.22	3033.1
1451393_at	Pex26	peroxisomal biogenesis factor 26	0.0483771	0.0256	16.1	312.69	75.54	333.35	310.35	302.35	277.38	244.2	270.31	234.71	281.37	344.09	315.02	325.27	385.8	342.98	375.2	356.72	256.4	293.12	284.2	354.91	338.97	303.46	295.64	334.53	325.04
1451397_at	Gigyf2	GRB10 interacting GYF protein 2	0.0259694	0.00826	20.06	266.81	39.98	272.83	299.01	276.78	269.65	236.62	239.68	289.03	234.95	240.22	234.67	261.57	287.77	299.15	299.55	295.18	284.97	264.01	232.8	265.29	245.03	259.36	268.33	219.59	287.14
1451440_at	Chodl	chondrolectin	0.00350088	0.0104	10.6	1256.9	1386.8	953.65	1053.57	1065.97	1465.43	1936.92	2202.58	3465.65	1645.75	932.32	721.4	846.46	1303.17	1504.52	1355.5	2125.47	1634.42	1498.86	1329.53	1210.64	1080.79	942.6	743.5	692.05	751.14
1451452_a_at	Rgs16	regulator of G-protein signaling 16	0.000435339	0.0188	9.46	380.56	1313.8	161.98	308.92	297.65	674.82	856.22	981.56	2645.11	578.63	377.11	327.02	197.34	300.58	17.5	384.01	618.31	762.35	609.21	596.55	640.96	603.62	375.51	232.92	164.4	100.95
1451483_s_at	1700054N08Rik	RIKEN cDNA 1700054N08 gene	0.00175983	0.00103	14.22	177.18	67.01	230.56	178.89	165.5	152.09	144.26	149.96	186.72	189.88	211.16	220.19	209.24	270.04	272.28	161.7	187.17	150.69	148.48	139.82	138.26	177.33	154.2	209.28	177.03	174.17
1451495_at	LOC100044766 /// Wac	similar to WW domain-containing adapter protein with coiled-coil /// WW domain containing adaptor with coiled-coil	0.00480685	0.00653	21.2	2964.33	507.54	2995.32	3157.5	3070.71	3228.05	2736.86	2646.55	3107.85	2502.19	2737.27	2757.43	3011.1	3517.27	2921.5	3358.64	3324.22	3370.54	2859.38	2735.47	2716.81	2933.33	2681.09	2703.32	3066.05	3022.46
1451512_s_at	Hibch	3-hydroxyisobutyryl-Coenzyme A hydrolase	0.00241723	0.00278	16.62	391.35	144.77	485.88	449.57	436.19	392.09	358.34	292.89	338.07	438.07	384.06	402.19	407.23	437.38	582.42	467.62	428.03	415.82	389.17	381.43	297.67	371.84	350.52	390.61	367.91	382.77
1451541_at	Bcs1l	BCS1-like (yeast)	0.000844755	0.00643	21.34	448.01	71.54	527.5	497.11	492.64	521.84	405.94	396.16	437.25	408.94	384.42	404.88	414.27	472.31	512.44	490	458.77	482.28	504.21	435.4	476.58	425.52	413.04	397.55	415.21	509.55
1451545_at	Tdrd3	tudor domain containing 3	4.74e-05	0.00115	19.29	394.69	114.86	460.68	436.73	430.2	425.73	392.86	363.33	413.18	317.54	367.42	366.59	388.26	515.27	547.26	434.58	473.52	440.63	377.58	354.55	345.68	366.11	358.01	359.11	396.53	413.89
1451556_a_at	2700078E11Rik	RIKEN cDNA 2700078E11 gene	5.84e-05	0.000535	20.19	441.45	108.79	483.84	477.76	507.02	469.47	402.04	311.67	398.56	335.68	397.2	429.89	499.14	528.47	453.02	529.25	453.24	495.21	389.61	394.8	382.78	382.32	414.19	345.45	496.16	516.76
1451570_a_at	Fam92a	family with sequence similarity 92, member A	0.0426146	0.0288	17.795	4314.84	440.19	4322.33	4099.25	4388.96	4277.22	4262.46	4119.22	4049.76	4214.59	4553.64	4564.75	4706.98	4307.35	3826.6	3884.42	4095.39	3922.86	4222.86	4403.95	4372.96	4688.24	4337.13	4567.96	4442.2	4381.93
1451587_a_at	Tiprl	TIP41, TOR signalling pathway regulator-like (S. cerevisiae)	0.0189875	0.00373	18	1463.05	199.77	1565.22	1538.33	1492.3	1373.02	1298.36	1320.79	1370.15	1377.15	1386.7	1477.72	1490.52	1453.5	1463.42	1697.89	1497.96	1420.7	1499.92	1462.68	1370.73	1468.64	1377.15	1497.74	1433.86	1525.17
1451595_a_at	Kcnq2	potassium voltage-gated channel, subfamily Q, member 2	0.00938414	0.00176	15.37	3626.06	1008.78	4068	3860.63	3558.44	3945.76	3340.04	3327.66	3792.73	3502.04	3576.94	3510.92	3650.38	5217.27	4138.81	4568.69	4633.19	4236.57	3534.22	3327.63	3601.74	3199.7	3366.76	3251.47	3779.53	3771.05
1451620_at	C1ql3	C1q-like 3	0.0146955	0.00988	10.35	7691.28	7261.56	4590.35	4782.8	3398.28	5854.77	8283.19	11336.7	17921.4	11834.9	11698.1	10161.3	8139.31	11272.4	7974.7	6332.24	7521.71	7804.98	7010.44	6900.23	6378.9	10118.5	10672.9	7577.59	6914.75	4729.53
1451700_a_at	1110007L15Rik	RIKEN cDNA 1110007L15 gene	0.0378494	0.0267	14.88	475.57	128.83	522.8	396.36	422.74	428.58	420.05	473.54	369.05	537.99	483.55	565.87	510.87	333.54	388.41	402.95	335.91	381.08	490.1	429.15	500.35	477.6	518.2	591.19	498.5	483.2
1451724_at	Ankmy2	ankyrin repeat and MYND domain containing 2	0.021933	0.00353	16.55	149.1	73.28	205.44	180.63	153.47	149.74	129.24	108.77	181.16	139.07	116.11	119.65	149.1	255.32	190.19	247.25	229.63	188.89	146.77	130.59	149.09	148.38	138.79	146.61	125.72	159.79
1451726_at	Mtmr6	myotubularin related protein 6	0.00760648	0.000939	20.46	862.05	229.35	959.26	1012.85	989.31	886.9	783.94	682.68	817.78	656.3	751.86	700.36	752.13	829.36	1114.99	1023.62	959.21	1072.86	854.58	870.14	859.94	915.73	837.39	867.06	812.29	864.17
1451747_a_at	Atg12	autophagy-related 12 (yeast)	0.000280489	0.00367	20.45	644.9	92.79	755.23	671.32	698.49	686.67	591.66	585.03	644.81	624.94	579.29	609.11	650.29	692.64	644.99	730.96	651.54	695.03	610.89	585.18	611.84	569.64	619.29	571.24	649.99	681.65
1451776_s_at	Hopx	HOP homeobox	0.0199664	0.00443	7.8	161.58	65.97	160.13	147.42	160.5	159.26	161.9	169.77	159.39	167.75	186.65	209.16	159.83	121.09	110.07	101.18	77.22	150.06	166.59	163.24	169.4	175.52	191.1	197.94	166.59	161.25
1451833_a_at	Setdb1	SET domain, bifurcated 1	0.0177352	0.0291	21.13	236.5	57.38	246.3	216.9	236.99	224.02	186.77	196.84	207.38	191.57	207.01	209.15	236.02	216.34	269.86	278.53	263.73	239.4	233.37	241.21	258.6	239.93	253.58	227.6	272.78	301.54
1451909_a_at	Prpf4b	PRP4 pre-mRNA processing factor 4 homolog B (yeast)	0.0311175	0.0102	17.42	238.79	101.58	231.73	211.85	239.94	225.46	205.56	144.87	224.47	152.4	196.42	201.97	259.29	237.64	348.04	324.98	268.39	290.67	249.03	256.73	258.37	264.54	230.44	216.02	273.91	253.98
1451967_x_at	Kpnb1	karyopherin (importin) beta 1	0.0223918	0.0101	15.75	690.76	157.21	700.82	769.26	755.26	671.75	648.32	693.6	578.75	688.72	692.81	709.54	761.55	805.06	715.62	742.4	858.07	645.28	628.48	636	543.65	609.16	646.01	580.46	599.3	695.46
1451991_at	Epha7	Eph receptor A7	0.0326049	0.0134	21.44	154.65	98.52	143.49	176.44	229.01	164.93	139.42	114.49	62.18	106.27	174.62	141.96	218.1	259.23	169.1	163.02	134.3	143.22	131.52	160.85	135.75	148.82	124.54	160.48	186.81	197.58
1451997_at	Zfp426	zinc finger protein 426	2.94e-05	0.000472	7.1	458.42	107.41	367.77	452.88	454.39	433.87	454.46	513.86	561.34	479.62	485.73	474.34	464.38	362.55	346.52	365.55	437.09	466.6	420.59	496.64	531.99	493.16	473.49	462.38	391.55	401.53
1452008_at	Ttc39b	tetratricopeptide repeat domain 39B	0.014792	0.0019	7.7	145.73	81.13	119.79	153.8	145.78	126.72	165.83	142.53	141.77	164.74	181.29	169.34	158.89	95.98	46.38	55.6	111.22	88.57	131.87	145.69	169.84	208.65	178.78	152.52	146.65	113.08
1452047_at	Cacybp	calcyclin binding protein	0.000116244	0.00124	18	6783.91	1519.28	7396.02	7596.36	6858.47	6909.13	6872.81	6440.78	6299.69	6362.68	6469.27	6657.87	7347.48	8375.29	7991.18	6648.68	6965.91	7035.56	6709.35	6368.74	5336.73	5747.19	5988.78	6011.04	6916.57	7344.07
1452049_at	Rpl7l1	ribosomal protein L7-like 1	0.00488055	0.00128	15.03	795.4	159.4	843.75	800.31	923.21	790.44	774.52	748.8	807.18	859.19	785.73	849.11	1001.82	989.26	990.04	790.48	868.14	782.37	703.65	683.03	687.65	772.3	685.07	777.13	832.11	906.64
1452052_s_at	Eif3j	eukaryotic translation initiation factor 3, subunit J	0.0415538	0.026	22.2	1329.11	256.12	1598.11	1506.99	1537.97	1546.06	1365.54	1345.44	1215.47	1208.24	1281.16	1329.68	1467.35	1410.12	1392.13	1270.23	1192.98	1313.1	1261.94	1257.13	1085.88	1268.35	1297.83	1329.83	1328.55	1397.13
1452061_s_at	Strbp	spermatid perinuclear RNA binding protein	0.00227626	0.00107	18.538	1534.73	312.66	1530.19	1677.22	1677.21	1505.9	1456.82	1215.28	1375.3	1367.09	1368.82	1452.22	1656.89	1840.6	1645.13	1680.38	1695.59	1710.64	1538.62	1391.58	1573.32	1530.84	1249.88	1412.59	1595.93	1551.48
1452062_at	Prpsap2	phosphoribosyl pyrophosphate synthetase-associated protein 2	0.0103714	0.000752	16.54	1184.91	236.57	1428.29	1303.61	1164.65	1168.27	1165.47	1120.02	1289.36	1096.16	1159.12	1138.69	1138.03	1380.2	1535.9	1569.3	1494.81	1416.58	1194.73	1102.5	1188.75	1181.06	1134.16	1174.55	1191.28	1190.07
1452086_at	Trmt5	TRM5 tRNA methyltransferase 5 homolog (S. cerevisiae)	0.0377839	0.0109	19.9	150.96	53.62	206.45	156.54	175.1	148.97	142.08	99.2	152.78	124.16	142.03	148.98	151.09	159.73	198.4	174.23	150.01	144.37	146.94	144.03	161.45	150.82	157.38	150.35	161.57	180.61
1452091_a_at	Rbm28	RNA binding motif protein 28	0.00350827	0.00192	23.62	284.19	115.51	280.11	290.57	268.98	325.91	281.02	258.14	301.71	244.01	224.98	229.11	238.06	349.44	444.69	407.27	364.16	366.83	313.56	300.84	251.48	213.66	271.71	251.94	287.36	300.75
1452094_at	P4ha1	procollagen-proline, 2-oxoglutarate 4-dioxygenase (proline 4-hydroxylase), alpha 1 polypeptide	2.72e-05	0.000409	21.45	310.78	87.93	387.25	341.2	363.79	382.89	306.81	253.82	290.47	250.8	275.33	267.22	383.59	408.74	415.96	349.32	304.5	358.07	314.76	263.99	283.64	254.69	281.22	288.86	406.28	426.66
1452132_at	Tlcd1	TLC domain containing 1	0.0460757	0.0449	12.12	648.25	159.95	651.91	648.65	608.02	583.57	609.58	710.99	612.9	848.86	633.93	684.71	645.68	528.96	589.88	587.28	603.88	590.12	699.39	647.85	755.43	654.8	717.22	715.89	655	651.02
1452147_at	Sec24c	Sec24 related gene family, member C (S. cerevisiae)	0.00330328	0.0436	17.771	1183.26	202.17	1199.05	1067.57	1112.92	1082.11	1003.79	1134.29	1122.26	1144.64	1185.24	1181.27	1197.4	1220.29	1408.13	1198.76	1136.72	1056.81	1144.55	1144.35	1201.32	1236.23	1271.6	1290.53	1377.28	1263.97
1452151_at	Gramd4	GRAM domain containing 4	6.6e-05	0.00143	2.86	423.55	75.34	424.36	435.21	491.83	451.86	455.38	460.56	422.73	410.14	420.77	420.82	383.31	352.47	419.12	433.33	437.44	503.14	451.1	487.32	450.79	409.22	418.36	397.13	402.74	405.2
1452159_at	2310001A20Rik	RIKEN cDNA 2310001A20 gene	0.0241726	0.0366	14.71	1415.92	185.12	1450.2	1322.59	1478.31	1362.93	1273.7	1226.26	1554.06	1525.06	1507.99	1385.46	1433.66	1337.76	1183.82	1189.29	1212.71	1379.73	1338.95	1398.18	1495.21	1517.35	1485.39	1529.87	1477.73	1442.43
1452168_x_at	Gspt1	G1 to S phase transition 1	0.0331796	0.0141	20.66	795.9	127.78	813.14	886.55	916.29	868.23	757.11	785.07	665.46	785.63	813.9	816.27	921.02	874.42	806.16	740.93	729.38	774.69	758.38	735.12	730.49	677.99	715.82	807.84	889.76	860.26
1452189_at	Wdr82	WD repeat domain containing 82	0.000127613	0.000432	20.68	3530.79	485.43	3965.39	3777.49	3653.12	3412.36	3703.26	3321.38	3194.55	3185.32	3449.31	3296.61	3538.89	3583.33	4156.18	3766.03	3776.1	3500.71	3527.83	3533.75	3309.49	3467.86	3359.45	3474.16	3659.63	3714.99
1452198_at	Fbxl10	F-box and leucine-rich repeat protein 10	0.0266384	0.000732	17.145	391.6	104.24	432.26	393.1	394.99	352.2	348.6	352.19	367.78	383.55	363.83	334.62	350.51	470.42	543.09	516.53	542.58	482.13	418.98	395.81	350.49	367.56	390.1	351.57	447.15	413.61
1452207_at	Cited2	Cbp/p300-interacting transactivator, with Glu/Asp-rich carboxy-terminal domain, 2	0.0114386	0.00143	13	1856.28	1181.31	1882.03	1951.82	1741	1408.04	1631.2	1938.47	2092.41	1773.62	1734.66	2068.74	2354.81	3268.84	3696.42	2424.52	2710.45	1631.2	1450.37	1395.27	1333.81	1441.99	1829.24	1830.53	2238.72	1969.36
1452213_at	Tex2	testis expressed gene 2	0.01151	0.00343	4.5	1615.68	341.24	1517.3	1614.36	1870.51	1694.18	1706.28	1617.01	2005.37	1530.08	1511.13	1529.81	1532.28	1465.16	1322.9	1435.41	1382.37	1653.62	1744.28	1954.03	1914.58	1895.97	1623.87	1555.52	1531	1640.55
1452214_at	Skil	SKI-like	0.0178049	0.0263	3.24	1491.48	369.35	1433.25	1631.52	1723.14	1725.18	1594.03	1463.91	2027.98	1478.62	1354.04	1352.67	1296.35	1593.03	1465.48	1949.56	1909.16	1982.61	1483.67	1490.98	1643.87	1658.33	1491.98	1289.27	1332.44	1332.96
1452232_at	Galnt7	UDP-N-acetyl-alpha-D-galactosamine: polypeptide N-acetylgalactosaminyltransferase 7	0.000103214	0.000705	16.1	696.17	411.13	721.26	781.79	671.07	749.79	623.29	572.04	589.55	570.89	734.42	723.51	954.1	1219.92	900.53	965.04	1105.86	663.13	594.38	583.01	397.65	528.58	579.04	634.11	903.89	794.53
1452240_at	Brunol4	bruno-like 4, RNA binding protein (Drosophila)	0.0200279	0.00686	23.04	12479.9	1478.11	12559.1	12604.1	12731	12730.9	12476	11871.4	13246	11098.9	11064.8	11731	12348.1	14021	12400.4	13894.9	13278.3	13458	12685.9	12163.4	12408.6	12180.5	12167.5	11271.2	12483.8	12940
1452247_at	Fxr1	fragile X mental retardation gene 1, autosomal homolog	0.000911318	0.00212	21.65	1099.32	268.84	1274.83	1169.85	1237.15	1356.23	1129.18	995.24	903.09	971.77	998.21	1078.06	1326.77	1275.59	1321.86	1048.73	1071.9	1222.17	1120.58	1056.22	865.38	1015.89	976.14	963.46	1320.33	1403.05
1452249_at	Prickle1	prickle like 1 (Drosophila)	1.43e-05	0.000123	6.8	654.52	228.84	596.5	572.24	676.79	707.32	771.73	798.72	960.7	753.19	693.91	573.17	571.71	544.44	503.02	597.57	541.69	570.13	683.84	712.34	783.78	798.3	661.56	623.91	647.48	588.12
1452257_at	Bdh1	3-hydroxybutyrate dehydrogenase, type 1	6.96e-05	0.000403	12.25	1519.15	374.9	1545.02	1383.07	1395.09	1335.04	1377.25	1569.15	1692.37	1850.34	1766.88	1814.39	1549.76	1145.98	1100.54	1204.98	1188.93	1233.09	1498.07	1520.58	1631.81	1542.61	1646.57	1694.78	1517.72	1425.31
1452265_at	Clasp1	CLIP associating protein 1	0.00155531	0.00167	6.9	4354.94	564.68	4056.24	4320.04	4080.23	4213.53	4731.6	4501.97	4887.7	4224.86	4403.69	4395.75	4237.82	3866.21	3926.21	4245.29	3876.23	4445.31	4771.85	4903.19	4995.57	4394.93	4804.21	3967.37	4389.84	4156.59
1452318_a_at	Hspa1b	heat shock protein 1B	0.00203915	0.00434	19.88	560.7	815.23	1368.8	788.62	980.21	968.99	654.84	428.78	182.08	364.61	369.52	486.66	1509.02	1723.81	952.37	577.03	333.85	897.54	544.37	531.64	475.82	332.3	348.99	541.23	1467.51	1812.53
1452347_at	Mef2a	myocyte enhancer factor 2A	0.00297728	0.0125	4.6	1376.2	175.6	1302.98	1419.79	1423.04	1398.19	1401.22	1564.97	1414.87	1372.78	1310.16	1376.64	1371.56	1288.41	1350.29	1422.17	1493.12	1571.96	1543.68	1346.64	1399.5	1375.76	1366.63	1345.29	1308.37	1220.77
1452378_at	Malat1	metastasis associated lung adenocarcinoma transcript 1 (non-coding RNA)	0.0446909	0.01	6.5	1382.59	964.36	1149.03	1397.5	1717.39	668.49	2045.01	1749.59	2236.79	1084.68	1187.65	1482.62	1367.67	1177.47	413.52	947.09	854.25	1455.38	1589.67	1766.63	1959.22	2342.25	1296.25	1454.23	898.93	906.47
1452398_at	Plce1	phospholipase C, epsilon 1	0.00875335	0.00179	21.05	525.38	129	622.16	645.64	557.26	563.87	523.11	496.65	387.63	510.26	459.35	529.13	590.56	627.48	460.34	530.65	477.09	482.62	494	463.26	448.67	426.14	527.66	546.07	605.88	578.68
1452404_at	Phactr2	phosphatase and actin regulator 2	0.00656442	0.0171	16.61	153.47	76.34	146.78	187.84	152.83	181.68	147.71	165.25	154.11	121.51	141.09	140.19	164.36	240.12	201.03	161.82	196.83	157.09	163.56	138.31	95.34	87.45	126.62	108.91	142.58	154.71
1452405_x_at	A130082M07Rik /// Tcra	RIKEN cDNA A130082M07 gene /// T-cell receptor alpha chain	0.0164919	0.0139	5.5	114	40.66	112.25	106.74	127.15	150.41	153.15	116.24	122.82	129.53	125.08	112.62	110.55	82.96	71.83	107.17	111.79	113.85	121.76	142.36	117.04	126.4	96.78	113.6	78.49	114.15
1452411_at	Lrrc1	leucine rich repeat containing 1	0.0198345	0.00461	16.3	108.99	42.35	104.25	120.74	93.56	124.68	86.68	70.23	117.47	108.84	95.66	91.56	109.15	132.57	144.38	154.94	135.15	128.86	115.89	91.82	91.07	72.11	89.17	87.14	127.83	112.47
1452460_at	Ankrd26	ankyrin repeat domain 26	0.0199886	0.002	15.98	103.08	29.8	106.42	109.59	113.96	98.53	103.09	93.82	98.36	97.96	93.18	112.82	105.83	125.43	116.62	133.35	122.96	104.79	101.37	97.66	95.23	102.18	91.1	73.76	107.43	103.07
1452462_a_at	Banp	BTG3 associated nuclear protein	0.000214089	0.00034	16.34	114.08	108.89	153.6	148.23	101.99	139.73	79.16	88.82	105.72	80.27	103.46	113.42	180.75	262.58	286.08	202.79	177.71	198.24	114.73	68.3	87.62	99.4	87.66	79.23	204.06	149.55
1452654_at	Zdhhc2	zinc finger, DHHC domain containing 2	0.00125706	0.00232	16.01	2284.43	772.59	2437.59	2584.45	2435.36	2436.5	2113.46	1990.97	2493.49	2028.29	2054.19	2176.05	2459.93	3480.68	2698.37	2763.86	2809.02	2825.07	2075.57	1976.44	1954.1	1941.86	2045.12	1935.51	2237.67	2331.2
1452655_at	Zdhhc2	zinc finger, DHHC domain containing 2	0.0100247	0.019	16.35	283.83	100.15	313.53	349	283.48	315.4	295.52	269.42	284.17	235.27	298.51	261.17	342.27	388.66	274.45	333.65	347.39	305.3	215.25	238.9	215.18	193.99	208.39	188.37	276.35	285.45
1452660_s_at	Klhl7	kelch-like 7 (Drosophila)	0.0176726	0.00526	15.46	5036.17	1203.8	5280.42	5320.25	4829.76	4965.7	4706.94	5134.85	5072.49	4415.54	4999.23	4925.28	5441.17	6739.61	5273.93	5290.82	5569.97	5733.9	4999.85	4541.66	4332.01	4614.24	4645.39	4520.78	5141.25	5520.97
1452661_at	Tfrc	transferrin receptor	0.00243701	0.0035	13.65	2350.95	634.3	2181.2	2287.61	2142.19	2271.92	2174.94	2448.83	2255.57	2709.38	2740.56	2544.63	2207.13	1697.93	2005.08	2099.31	2351.45	2467.5	2594	2966.52	2912.74	2939.73	2377.77	2556.64	2350.45	2208.9
1452662_a_at	Eif2s1	eukaryotic translation initiation factor 2, subunit 1 alpha	0.00305321	0.00813	20.54	1633.5	267.88	1937.48	1779.17	1778.16	1787.57	1615.51	1620.9	1408.73	1444.45	1587.88	1657.43	1944.48	1812.6	1632.28	1606.41	1605.98	1768.88	1659.06	1556.48	1580.44	1576.6	1539.03	1634.72	1832.88	1909.87
1452709_at	Poldip3	polymerase (DNA-directed), delta interacting protein 3	0.0334636	0.00337	14.74	898.3	209.59	998.09	899.82	863.45	917.24	846.96	842.5	953.9	892.69	837.45	852.87	968.88	1039.29	1243.53	1069.28	1102.77	939.78	862.56	863.68	824.35	894.12	844.61	899.33	902.15	897.26
1452714_at	Tanc1	tetratricopeptide repeat, ankyrin repeat and coiled-coil containing 1	0.000189791	0.000329	16.87	233.13	172.3	349.71	340.71	248.78	338.25	193.05	217.24	203.3	243.79	231.18	190.16	233.54	467.44	487.32	534.76	480.56	367.08	232.73	206.93	210.44	191.9	225.43	214.94	219.68	314.38
1452730_at	Rps4y2	ribosomal protein S4, Y-linked 2	0.0372439	0.00347	7.6	2336.79	475.13	2288.18	2194.64	2021.38	2350.68	2365.02	2585.27	2352.01	2507.96	2428.79	2585.39	2285.13	1743.71	1701.49	2004.8	2132.43	1880.76	2418.16	2342.88	2257.95	2330.71	2361.85	2651.75	2473.03	2241.18
1452741_s_at	Gpd2	glycerol phosphate dehydrogenase 2, mitochondrial	0.0150191	0.000343	6.5	1075.73	355.21	1060.5	1112.03	951.43	1121.58	1228.88	1227.82	1426.67	1489	1342.1	1245.2	1150.54	1072.44	946.82	778.58	919.5	929.41	1010.14	1038.98	1079.01	1017.63	1180.69	1082.31	1071.42	1070.51
1452753_at	Foxk2	forkhead box K2	0.00314673	0.002	19.52	588.95	127.03	748.63	642.68	647.23	561.96	526.36	542.96	555.01	494.58	551.45	555.27	657.27	607.47	649.17	655.58	636.4	635.53	557.94	553.11	661.34	570.42	523.99	542.01	625.37	683.84
1452754_at	Creld2	cysteine-rich with EGF-like domains 2	0.00150777	0.0021	17.749	659.87	225.38	920.82	702.29	616.9	655.06	619.25	476.4	679.71	658.84	616.59	645.21	815.36	861.84	865.43	660.9	616.9	761.98	684.15	625.91	591.97	640.31	601.86	713.16	812.81	927.15
1452758_s_at	Eif4g2	eukaryotic translation initiation factor 4, gamma 2	0.0238711	0.0159	20.15	15937.1	2174.37	15850.9	16826	16448.5	15659.3	16772.8	14198.9	15626.5	14636.9	15382	15732.1	16925.5	17705	17638.7	15832.3	17999.6	16000.9	14670	16079.6	13650.9	15873.4	16200.7	15426.4	16648.5	16166.9
1452759_s_at	Ppfibp1	PTPRF interacting protein, binding protein 1 (liprin beta 1)	0.0101697	0.00291	23.42	248.11	75.77	249.64	279.46	227.89	282.08	253.75	221.07	227.94	216.33	216.01	246.59	255.45	227.46	348.35	272.64	283.21	319.9	258.54	241.35	212.21	196.81	237.93	230.91	306.54	282.85
1452769_at	Rnf145	ring finger protein 145	0.00191355	0.00721	6.9	4512.48	1181.89	4508.42	4077.43	4664.91	4669.34	4516.54	4848.69	6224.16	4669.52	4483.06	4106.88	4021.84	4082.38	4440.12	4140.64	4310.25	4523.08	4734.3	4820.08	4847.92	5206.55	4528.44	4409.61	3860.38	4167.01
1452770_at	Vkorc1	vitamin K epoxide reductase complex, subunit 1	0.0186933	0.00113	7.8	894.96	237.94	907.45	824.44	807.4	929.16	955.94	1099.83	960.28	1127.88	997.67	970.06	870.16	652	751.84	703.67	746.88	771.11	945.2	882.47	864.96	862.69	967.75	1048.2	832.07	938.62
1452771_s_at	Acsl3	acyl-CoA synthetase long-chain family member 3	0.00172218	0.00841	6.5	5488.05	1298.82	4964.72	5542.8	5776.86	5662.08	5618.28	5938.96	7310.8	5834.44	5453.51	5170.84	4875.94	4850.37	4713.16	5186.65	5985.38	5322.56	5304.62	6032.45	5522.58	5734.76	5431.88	5557.18	4980.83	4726.44
1452779_at	3110006E14Rik	RIKEN cDNA 3110006E14 gene	0.000334924	0.00112	19.19	2015.54	762.51	2674.06	2183.32	2254.62	2058.18	1886.87	2037.24	1404.08	1972.26	1993.84	1923.04	2307.26	2435.58	2929.11	2164.13	1915.11	1664.23	1941.46	1807.43	1866.03	1703.96	1772.81	2198.66	2215.81	2295.19
1452797_at	Fastkd3	FAST kinase domains 3	0.00614549	0.00267	11.47	438.15	92.56	448.3	373.17	444.13	371.92	427.21	463.63	539.18	454.05	484.91	459.38	425.8	394.74	354.06	381.72	426.88	432.17	397.09	484.48	483.13	463.19	417.2	449.84	452.82	386.86
1452810_at	Ints10	integrator complex subunit 10	0.0149452	0.00822	16.38	325.41	110.58	332.25	311.5	334.77	344.59	266.58	290.5	308.12	293.05	310.39	331.26	364.02	390.64	487.74	373.79	329.1	321.2	306.32	302.53	317.21	360.48	278.95	321.73	354.47	372.07
1452836_at	Lpin2	lipin 2	0.00294377	0.00168	18.274	1322.73	286.69	1487.24	1367.63	1328.74	1355.78	1168.75	1114.72	1200.92	1163.81	1187.27	1240.88	1245.6	1378.06	1688.11	1452.23	1352.44	1336.8	1346.38	1247.82	1341.2	1274.65	1227.03	1156.19	1316.71	1337.01
1452837_at	Lpin2	lipin 2	0.0177484	0.0158	10.55	847.43	117.9	902.34	888.32	850.62	805.19	836.66	897.63	866.39	861.78	907.75	917.19	885.7	906.2	761.69	745.1	747.6	803.71	706.98	772.87	780.77	681.39	844.24	776.06	917.15	893.92
1452841_at	Pgm2l1	phosphoglucomutase 2-like 1	9.28e-08	5.72e-05	8.75	4239.5	1381.72	3269.53	3510.1	3579.43	3637.64	4227.04	4464.57	4956.36	4942.36	4944.3	4985.1	4251.96	3276.73	3035.01	2575.78	2399.49	3074.79	3868.97	4453.84	4631.44	5162.94	4715.12	4281.52	4306.67	3647.43
1452858_at	Elavl1	ELAV (embryonic lethal, abnormal vision, Drosophila)-like 1 (Hu antigen R)	0.00428738	0.00228	18.267	630.17	211.4	720.53	722.31	637.91	640.13	555.11	486.08	586.83	569.99	553.74	628.64	564.19	718.65	908.89	831.86	750.09	662.78	523.26	614.62	571.42	668.7	610.72	575.03	635.91	631.71
1452869_at	Prpf38b	PRP38 pre-mRNA processing factor 38 (yeast) domain containing B	0.0153983	0.00284	15.15	1232.24	307.94	1164.88	1266.53	1176.92	1261.01	1181.26	1111.36	1238.2	1161.07	1157.01	1227.14	1434.9	1596.81	1682.56	1472.83	1534.12	1513.62	1237.35	1089.27	1066.68	1214.42	1227.02	1138.87	1563.4	1379.74
1452887_at	Traf3ip1	TNF receptor-associated factor 3 interacting protein 1	0.0125625	0.0188	10.48	196.03	60.77	158.85	158.03	190.25	190.06	182.29	195.29	259.88	173.88	223.41	249.14	205.9	145.58	157	142.87	181.5	243.01	215.37	203.87	226.07	264.42	202.36	196.77	215.35	181.13
1452913_at	Pcp4l1	Purkinje cell protein 4-like 1	0.00947666	0.00239	6.7	480.86	146.38	470.78	403.34	495.53	419.52	513.35	557.6	498.7	498.78	541.91	478.09	431.75	378.41	351.85	312.9	326.91	465.9	565.9	511.31	514.49	483.62	505.35	605.66	477.57	474.59
1452929_at	Clip1	CAP-GLY domain containing linker protein 1	0.0352051	0.00157	18	2070.55	402.32	2160.21	2112.02	2047.97	1982.67	1675.54	1659.66	1941.05	1729.08	1836.51	1914.91	2089.6	2350.98	2410.82	2378.08	2464.3	2378.6	2047.34	1961.91	2284.71	2127.6	2051.5	1989.27	2270.04	2248.72
1452935_at	EG546143	predicted gene, EG546143	0.0240298	0.0146	16.25	371.73	138.75	432.94	416.49	388.67	339.3	407.06	317.72	536.78	354.8	326.66	329.3	324.6	502.5	544.45	512.07	531.34	530.94	427.51	323.45	307.37	266.94	332.59	293.33	334.41	442.23
1452940_x_at	Pitpnc1	phosphatidylinositol transfer protein, cytoplasmic 1	0.00513653	0.0167	21.35	193.11	39.6	229.51	236.08	212.08	237.57	191.89	177.33	187.24	194.33	167.53	179.42	204.65	244.45	184.15	238.28	195.28	223.88	182.79	167.04	182.98	184.78	172.47	165.24	204.75	195.14
1452942_at	Tmem65	transmembrane protein 65	0.000414957	0.000624	19.06	1315.29	337.44	1492.31	1447.48	1462.93	1439.63	1167.27	1092.35	1262.11	1201.41	1116.98	1118.1	1263.31	1767.24	1744.78	1598.11	1568.02	1664.03	1287.85	1202.23	1255.84	1342.73	1204.34	1168.21	1402.82	1350.23
1452946_a_at	Rftn2	raftlin family member 2	9.16e-06	0.0191	2.16	166.02	59.54	205.23	207.32	197.2	239.18	193.01	188.47	159.55	187.6	163.68	126.8	148.76	152.25	161.33	196.78	194.3	217.76	209.24	168.35	148.82	134.75	120.1	145.85	124.85	147.59
1452970_at	Zmym2	zinc finger, MYM-type 2	0.00100165	0.00135	18	1435.59	420.14	1489.67	1461.84	1550.36	1515.2	1248.07	1259.58	1409.34	1132.99	1237.04	1334.02	1563.02	1960.87	1564.43	1696.8	1725.46	1680.19	1345.95	1276.86	1242.66	1384.19	1259.46	1120.6	1538.23	1501.42
1452975_at	Agxt2l1	alanine-glyoxylate aminotransferase 2-like 1	0.00018077	0.000939	16.71	2906.7	407.17	3178.63	3287.08	2815.18	2706.55	2668.46	2653.38	2523.22	2877.89	3020.7	3259.11	3228.26	2944.66	3288.03	3088.61	3337.56	2681.73	2687.13	2684.48	2536.88	2816.98	2816.82	3044.79	2935.52	2950.44
1452977_at	Zhx3	zinc fingers and homeoboxes 3	0.00580822	0.00589	17.743	471.29	90.03	483.88	526.32	437.62	514.03	420.92	417.07	476.85	480.69	427.13	462.26	530.15	589.64	537.51	582.23	574.12	456.41	428.69	409.58	465.74	460.57	447.91	448.6	580.06	503.36
1453001_at	Rnaseh2b	ribonuclease H2, subunit B	0.00781875	0.0019	4.6	293.92	78.88	285.48	274.84	290.15	297.65	312.22	329.59	294.68	314.81	309.6	338.52	298.21	257.63	220.65	251.9	203.53	227.2	283.21	304.66	361.29	296.85	325.24	293.15	290.27	286.84
1453010_at	Iws1	IWS1 homolog (S. cerevisiae)	0.000407239	0.000872	19.99	144.76	38.37	173.42	147.94	160.49	169.33	114.62	124.13	141.29	125.16	113.34	124.48	165.61	187.61	181.02	159.19	158.09	174.96	141.57	136.88	129.07	137.39	110.87	136.57	162.77	175.46
1453036_at	5430439M09Rik	RIKEN cDNA 5430439M09 gene	0.0341363	0.0314	16.62	103.79	49.87	104.23	123.18	109.81	116.28	99.5	80.3	112.23	103.36	86.08	101.14	110.22	172.61	112.17	105.02	137.53	127.3	94.88	78.94	72.87	95.7	85.66	86.02	96.68	109.86
1453077_a_at	Snapc3	small nuclear RNA activating complex, polypeptide 3	9.29e-06	0.000498	18.759	205.4	121.16	272.63	248.34	228.7	213.19	183.11	106.18	145.02	167.41	191.67	183.46	254.65	234.04	348.5	246.52	208.1	213.04	202.71	176.26	149.84	159.79	174.45	208.15	195.06	236.97
1453087_at	6330403L08Rik	RIKEN cDNA 6330403L08 gene	7.22e-07	0.000386	19.48	164.76	127.67	342.68	256.91	258.31	197.71	164	148.02	87.35	163.78	161.66	165.52	218.86	290.73	291.63	263.79	216.21	163.39	163.11	153.15	163.05	150.28	148.11	146.42	201.89	231.83
1453097_a_at	Ubtf	upstream binding transcription factor, RNA polymerase I	0.00368002	0.0022	15.47	275.53	155.82	335.22	279.66	252.16	283.03	261.87	252.94	298.43	264.47	263.11	265.45	275.09	400.15	515.63	412.07	350.36	303.85	244.99	203.99	223.8	227.4	252.92	275.98	302.67	293.32
1453101_at	Klhl25	kelch-like 25 (Drosophila)	0.0296545	0.0224	16.29	126.03	35.93	144.37	145.51	137.12	130.04	121.79	109.56	142.69	129.75	105.23	124.2	129.81	148	172.27	132.73	141.42	126.61	125.45	120.44	108.85	114.63	100.42	120.6	121.1	110.91
1453187_at	Ociad2	OCIA domain containing 2	0.000242455	0.000698	20.48	336.95	152.63	452.95	415.27	401.22	318.96	326.51	326.61	243.65	235.34	288.08	251.12	367.42	418.87	496.16	540.59	404.32	318.8	337.54	331.01	375.62	336.36	285.21	340.87	333.84	446.75
1453221_at	Gopc	golgi associated PDZ and coiled-coil motif containing	0.00598533	0.0107	6.3	597.92	109.47	521.93	597.78	605.56	678.9	597.53	598.66	733.23	589.38	604.18	592.29	571.29	594.3	537.18	571.69	613.05	602.2	618.38	618.33	717.12	740.87	598.07	580.23	561.91	540.85
1453310_at	Ppil6	peptidylprolyl isomerase (cyclophilin)-like 6	0.000782849	0.00425	7.2	120.17	45.79	98.57	114.51	146.78	137.12	152	124.01	177.08	125.45	121.7	96.97	98.15	102.68	90.54	94.87	116.08	176.93	182.11	142.84	111.79	123.97	123.42	115.34	105.12	118.64
1453317_a_at	Khdrbs3	KH domain containing, RNA binding, signal transduction associated 3	0.00480517	0.0269	21.6	1277.94	360.96	1423.87	1415.5	1309.17	1476.41	1203.84	1290.63	1169.15	1331.97	1129.7	1067.35	1321.09	1377.9	1704.57	1265.25	1234.93	1397.47	1338.7	1180.63	1133.33	982.66	1099.12	1178.12	1226.57	1338.59
1453366_at	Tdrkh	tudor and KH domain containing protein	0.000129508	0.00028	12.29	120.96	32.02	123.96	106.28	107.61	112.39	116.51	114.65	153.9	151.9	147.76	133.62	134.24	135.04	115.46	101.19	102.87	89.86	120.51	119.34	123.36	129.9	124.63	137.81	119.08	121.42
1453402_at	6430500C12Rik	RIKEN cDNA 6430500C12 gene	0.0346069	0.0114	14.99	186.7	58.5	166.97	179.3	182.3	227.11	170.99	159.13	207.68	190.4	252.58	250.68	248.46	181.12	135.57	138.1	183	180.74	175.2	206.6	210.28	227.81	221.93	199.37	198.66	174.86
1453406_a_at	Rab28	RAB28, member RAS oncogene family	0.00229505	0.00235	18.55	881.94	233.04	956.85	971.65	940.96	884.38	859.73	712.48	901.45	747.46	761.12	817.71	879.5	892.55	1178.55	1061.15	1022.44	918.96	864.66	864.95	795.44	908.87	804.87	852.31	777.07	889.29
1453421_at	Srr	serine racemase	0.0013451	0.0161	21.29	450.09	213.83	515	506.96	467.56	532.84	464.38	466.21	518.42	433.32	375.8	338.92	388.65	529.16	766.58	553.32	628.57	561.65	435.8	397.06	355.19	389.22	380.61	358.41	392.1	429.16
1453465_x_at	OTTMUSG00000015563	predicted gene, OTTMUSG00000015563	0.0208102	0.00841	18.25	108.96	51.02	109.79	121.32	122.85	104.48	108.68	102.94	100.62	84.08	103.49	113.1	133.14	164.65	121.44	106.97	123.68	107.56	109.23	108.35	62.61	97.53	108.67	119.62	110.2	119.96
1453581_at	Cep170	centrosomal protein 170	0.00235026	0.00293	21.98	675.33	136.77	700.15	714.49	666.29	798.41	685.13	650.64	711.25	569.85	647.82	635.3	652.96	784.77	802.03	817.6	800.29	837.98	684.38	663.08	630.25	650.87	655.28	564.44	711.26	662.54
1453651_a_at	Brp44l	brain protein 44-like	0.0172663	0.001	5.2	4903.95	998.66	4962.05	4533.98	4679.43	4680.28	5464.82	5754.26	5087.67	5474.82	5577.17	5237.92	4877.54	3756.93	4597.29	4223.6	3948.61	3782.8	5046.11	5095.44	4918.53	4889.37	5284.52	5635.26	4609.69	4735.26
1453744_a_at	Ankrd40	ankyrin repeat domain 40	0.0281555	0.0371	19.31	229.28	49.93	275.51	244.82	262.39	226.05	253.7	230.22	217.53	228.6	233.19	223.79	268.51	233.26	212.58	175.65	229.95	181.23	189.74	200.86	192.11	201.09	226.6	269.31	260.23	247.55
1453804_a_at	Orc4l	origin recognition complex, subunit 4-like (S. cerevisiae)	0.00192035	0.00509	19.19	810.75	162.56	835.1	830.75	872.77	740.27	718.42	703.93	616.9	724.92	793.04	834.15	931.65	895.91	814.27	780.67	807.23	859.71	747.43	783.72	752.57	835.31	739.9	817.8	920.1	942.02
1453915_a_at	Slc37a3	solute carrier family 37 (glycerol-3-phosphate transporter), member 3	0.012431	0.0135	20.9	333.09	128.16	386.22	359.89	402.41	382.28	277.84	249.89	298.6	317.23	278.58	288.41	335.76	328.16	506.21	346.27	359.69	330.42	341.9	326.49	336.45	326.65	289.72	329.64	351	382.41
1453983_a_at	Mett10d	methyltransferase 10 domain containing	0.00135071	0.0202	20.65	822.23	273.83	904.4	1072.75	895.23	826.96	898.59	817.49	884.75	588.55	790.22	758.64	877.38	1003.89	904.7	993.25	954.58	868.04	663.4	602.68	525.09	567.41	684.85	695.04	727.1	740.27
1454044_a_at	Pex3	peroxisomal biogenesis factor 3	0.0302664	0.00894	11.98	833.29	171.35	730.52	820.58	761.24	770.77	790.54	847.86	1058.36	920.97	902.11	847.5	799.86	864.14	753.67	828.79	914.05	868.68	805.44	837.8	952.69	922.83	846.91	796.21	783.95	715.67
1454084_a_at	Senp8	SUMO/sentrin specific peptidase 8	0.00485015	0.0207	22.18	247.02	58.83	281.38	309.03	281.59	291.05	266.63	263.07	238.26	232.26	231.94	239.03	297.96	312.34	252.78	272.08	267.97	240.56	198.78	202.04	194.69	199.56	217.03	207.4	259.39	241.26
1454109_a_at	Jmjd6	jumonji domain containing 6	0.0265482	0.013	18.952	120.13	27.8	149.85	141.31	142.95	114.38	124.76	95.54	94.25	137.12	112.1	133.11	136.11	143.85	111.81	123.28	121.24	117.32	118.1	119.02	118.94	108.85	113.79	115.38	136.89	143.28
1454236_a_at	Fam118b	family with sequence similarity 118, member B	0.0164389	0.0179	17.494	300.8	98.77	326.11	308.52	257.82	269.11	274.29	253.91	258.17	302.81	308.3	248.3	306.03	373.92	402.33	348.12	303.62	267.8	290.32	280.58	283.83	232.28	303.03	298.79	429.81	324.31
1454602_s_at	Cnot2	CCR4-NOT transcription complex, subunit 2	0.0254414	0.00134	15.67	429.35	144.41	461.14	454.8	433.14	412.82	362.05	344.55	490.58	386.41	411.48	385.21	460.94	531.82	633.37	525.1	566.16	546.4	414.67	411.66	381.78	425.57	390.41	405.34	476.53	448.95
1454605_a_at	LOC100047707 /// Pi4k2a	hypothetical protein LOC100047707 /// phosphatidylinositol 4-kinase type 2 alpha	0.0470798	0.0275	17.488	681.02	91.02	805.39	687.78	714.31	678.21	632.11	627.96	675.1	658.89	715.28	676	728.2	712.21	727.64	713.91	680.9	671.45	656.67	669.53	708.15	687.64	623.34	681.14	676.99	717.84
[truncated: 204 more rows]
