# Supplementary material for: Lhx1 maintains synchrony among circadian oscillator neurons of the SCN
Source: eLife. 2014 Jul 17;3:e03357. doi: 10.7554/eLife.03357 (PMC4137275; doi:10.7554/eLife.03357)
Supplement: Supplementary file 2. — (A) Transcripts showing >2 fold expression changes after 1 hr light pulse from CT6, CT16, and CT22. The dark controls for this data set were from Supplementary file 1. Therefore, for consistency in naming, the CT6, CT16, and CT22 samples are labeled as CT30, CT40, and CT 46. (B) Transcripts showing both light regulation and rhythmic expression. (C) Fold changes (ratio of light exposed SCN value to dark control SCN value) for light-modulated transcripts. DOI: http://dx.doi.org/10.7554/eLife.03357.017 [file elife03357s002.xlsx]

## Sheet: Suppl file 2A
Supplementary File 2A. Transcripts showing >2 fold expression change after 1 h light pulse at CT6, 16 and 22.
Naming convention: 1LCT30, e.g., refers to the value at 1h after light pulse at CT30. "D" refers to the dark control.
Probe Set ID	Gene Symbol	Gene Title	1DCT30	1LCT30	2DCT30	2LCT30	4DCT30	4LCT30	1DCT40	1LCT40	2DCT40	2LCT40	4DCT40	4LCT40	1DCT46	1LCT46	2DCT46	2LCT46	4DCT46	4LCT46
1418604_at	Avpr1a	arginine vasopressin receptor 1A	88.0414	95.0322	138.825	97.7209	100.669	102.33	314.119	240.126	851.018	158.263	723.134	163.199	152.028	142.895	167.789	79.4582	112.284	40.8528
1423100_at	Fos	FBJ osteosarcoma oncogene	1308.42	3104.06	1002.26	936.22	663.864	512.971	552.208	14524.6	288.394	1225.53	309.026	372.889	1368.82	5416.85	1924.07	1319.43	1114.98	1111.95
1437247_at	Fosl2 /// LOC634417	fos-like antigen 2 /// similar to fos-like antigen 2	414.681	505.512	267.335	337.194	171.007	174.357	142.368	3081.31	159.947	3296.6	161.925	304.159	563.436	4778.97	1311.55	2440	774.31	782.295
1426852_x_at	Nov	nephroblastoma overexpressed gene	1042.82	969.98	1600.69	1130.1	1483.21	1152.83	2037.26	2160.01	4475.79	1494.81	3375.7	1249.12	914.248	974.477	1927.47	608.896	1269.05	823.172
1419008_at	Npy5r	neuropeptide Y receptor Y5	127.063	146.55	146.688	142.329	127.802	124.581	117.088	97.2165	309.617	96.0585	207.885	91.3665	140.498	106.724	191.474	91.019	159.834	119.392
1428834_at	Dusp4	dual specificity phosphatase 4	798.941	653.8	589.04	419.229	271.549	269.459	62.6604	746.367	106.013	378.442	80.4502	107.316	360.926	790.153	714.281	552.23	607.296	643.513
1428664_at	Vip	vasoactive intestinal polypeptide	15093.3	11830.1	17650.9	11936.8	13322.9	12372.6	14931	14072.4	29419.6	13369.2	24911.1	13089.8	12263.6	11662.9	17835.8	10001.3	13383	10723.2
1449851_at	Per1	period homolog 1 (Drosophila)	882.8	823.256	718.145	574.746	485.967	478.982	219.564	970.987	388.835	521.376	292.599	209.426	511.722	1027.68	510.563	605.99	581.923	620.322
1417602_at	Per2	period homolog 2 (Drosophila)	1108.45	906.033	1088.7	954.623	975.92	1017.66	327.283	601.63	315.537	1166.48	231.918	612.469	306.502	436.61	323.508	479.599	458.634	529.981
1421951_at	Lhx1	LIM homeobox protein 1	442.834	410.488	665.744	322.545	471.989	303.933	558.742	537.157	1205.8	290.913	1332.17	304.167	690.001	353.092	800.725	270.937	532.91	289.103
1417409_at	Jun	Jun oncogene	585.917	795.997	765.679	802.206	841.341	789.963	912.255	3050.13	599.813	1723.32	582.446	700.501	686.756	1443.34	737.631	949.373	688.562	770.749
1419681_a_at	Prok2	prokineticin 2	207.304	148.461	237.052	117.365	89.1727	51.5629	8.11226	78.5468	8.83236	114.659	8.71608	37.8041	97.0489	448.459	322.599	422.555	300.1	495.387
1438086_at	Npy6r	neuropeptide Y receptor Y6	240.027	173.537	251.291	182.631	217.194	160.508	307.758	106.188	649.008	146.253	558.765	225.149	204.98	96.2032	391.621	88.4342	221.048	164.557
1421391_at	Vipr2	vasoactive intestinal peptide receptor 2	187.185	90.4926	117.092	124.519	123.789	142.233	304.297	282.611	603.872	244.486	815.694	212.289	272.958	211.694	437.915	142.396	226.03	126.708
1458534_at	Rgs7bp	regulator of G-protein signalling 7 binding protein	459.356	560.799	255.661	571.94	310.356	467.957	497.17	517.72	147	420.976	194.928	409.919	347.752	656.369	220.353	565.734	173.339	431.021
1417065_at	Egr1	early growth response 1	557.104	1679.87	453.096	1078.57	444.796	550.188	442.792	20205.9	676.657	4816.78	203.17	641.541	509.5	7272.25	482.314	2308.4	488.036	734.053
1423619_at	Rasd1	RAS, dexamethasone-induced 1	1202.2	845.586	1406.5	915.238	1823.62	1637.87	3525.06	2582.66	7927.69	2715.22	6260.48	4282.73	991.584	660.435	1644.33	571.94	1225.82	751.718
1418603_at	Avpr1a	arginine vasopressin receptor 1A	274.459	178.085	345.527	204.72	280.696	194.734	709.629	543.138	1527.87	335.077	1360.24	384.208	392.336	267.56	456.771	149.71	230.21	151.027
1424525_at	Grp	gastrin releasing peptide	2622.44	1771.62	3088.23	1467.98	2305.14	1600.9	2053.68	2141.4	7622.39	2063.43	5548.86	1627.67	2398.6	1979.39	3544.47	1382.58	2647.72	1783.02
1440564_at	Prokr2	prokineticin receptor 2	1503.44	1188.74	1627.51	1107.43	1541.37	1174.23	2191.26	2432.35	5604.72	2988.71	5358.91	2507.97	1929.31	1919.96	4176.08	1620.91	2564.63	1766.11
1429991_at	Fezf1	Fez family zinc finger 1	261.34	223.751	86.7119	225.78	192.261	280.156	198.632	197.74	13.9975	279.55	16.3436	235.679	107.132	242.993	25.2808	275.738	155.77	194.89
1421990_at	Syt1	synaptotagmin I	946.563	1049.36	260.575	785.941	479.008	877.862	703.644	719.41	155.93	653.229	235.195	609.619	597.653	700.582	284.354	800.654	337.136	782.627
1423288_s_at	Cbln1 /// LOC100046314	cerebellin 1 precursor protein /// similar to precerebellin-1	462.43	413.642	174.33	352.531	284.021	424.571	263.118	197.239	9.48626	304.353	11.9245	318.952	235.031	308.243	37.9795	413.843	304.634	351.814
1450370_a_at	Kcnip4	Kv channel interacting protein 4	399.789	371.994	178.95	392.538	209.003	463.509	289.217	344.209	51.0142	285.558	129.287	350.644	274.012	345.167	143.339	405.091	212.485	371.457
1419473_a_at	Cck	cholecystokinin	1672.06	775.708	938.901	782.77	1080.72	833.614	1355.4	999.418	3100.55	1304.42	3277.02	1268.41	1543.52	1986.63	3678.96	1217.03	2343.2	1169.25
1451800_at	Gcc2	GRIP and coiled-coil domain containing 2	325.462	346.152	127.687	349.298	205.837	363.814	374.253	317.122	54.4528	297.772	108.166	231.716	248.348	302.509	117.913	259.602	118.548	275.435
1423286_at	Cbln1 /// LOC100046314	cerebellin 1 precursor protein /// similar to precerebellin-1	1576.91	1332.18	656.753	1246.38	1025.1	1550.81	932.24	897.505	65.4108	1187.99	112.306	1164.03	858.564	1019.74	248.367	1344.45	1067.25	1139.48
1452479_at	Copg2as2	coatomer protein complex, subunit gamma 2, antisense 2	349.831	471.432	133.076	400.754	189.425	305.078	299.741	289.103	38.246	271.858	101.911	219.364	313.6	262.596	147.768	399.383	151.176	382.776
1423287_at	Cbln1 /// LOC100046314	cerebellin 1 precursor protein /// similar to precerebellin-1	1656.72	1465.92	750.73	1541.91	1329.22	1802.73	1331.26	1113.6	51.3408	1570.04	147.794	1655.74	1032.34	1431.99	304.871	1797.12	1266.34	1346.18
1419491_at	Defb1	defensin beta 1	257.307	188.178	98.0895	261.275	253.024	351.593	218.429	136.782	8.30724	251.518	10.9574	297.458	117.424	241.553	23.7975	284.675	211.817	224.507
1425833_a_at	Hpca	hippocalcin	279.121	308.02	113.896	359.367	151.13	286.678	234.663	241.489	16.3781	151.075	55.4886	151.78	194.862	311.022	100.612	339.215	139.503	199.055
1421280_at	Gabra1	gamma-aminobutyric acid (GABA-A) receptor, subunit alpha 1	819.179	894.105	325.907	879.626	498.479	828.484	569.325	713.856	120.476	682.84	151.428	731.605	522.611	693.94	272.943	786.73	346.21	676.07
1455720_at	Adamts2	a disintegrin-like and metallopeptidase (reprolysin type) with thrombospondin type 1 motif, 2	166.145	155.141	60.7498	128.203	138.324	166.485	134.164	113.063	15.5667	162.771	21.6784	154.082	104.442	153.971	44.8775	172.844	148.272	184.452
1452378_at	Malat1	metastasis associated lung adenocarcinoma transcript 1 (non-coding RNA)	4339.76	5378.83	1084.68	5282.84	1187.65	3656.91	3535.1	3927.76	413.522	4267.56	947.086	1908.2	4826.85	2923.67	1455.38	4451.79	1589.67	5214.36
1443287_at	Gm1337	gene model 1337, (NCBI)	10.1709	6.08735	15.8786	10.6061	5.75075	8.39637	65.2588	59.9614	378.326	64.6084	370.251	16.5332	117.366	98.6231	282.518	53.7572	94.0308	15.2506
1427624_s_at	Il22 /// Iltifb	interleukin 22 /// interleukin 10-related T cell-derived inducible factor beta	43.3239	34.2244	57.0031	36.378	98.6188	91.4988	810.777	525.407	2101.13	465.065	1451.38	897.886	302.213	254.565	639.424	185.87	350.648	176.368
1445815_at	Fzd8	frizzled homolog 8 (Drosophila)	122.886	69.9024	152.936	95.5389	208.419	114.484	229.676	110.348	544.018	69.1017	506.809	118.166	95.8405	75.6794	199.118	50.7727	131.498	95.0929
1436329_at	Egr3	early growth response 3	37.9728	114.345	112.894	144.48	65.8603	85.9477	69.1489	3917.53	219.903	2837.47	25.145	470.099	64.327	2366.46	98.5538	916.87	89.207	263.344
1420506_a_at	Stxbp1	syntaxin binding protein 1	1035.59	1293.29	422.313	1189.76	535.094	804.593	835.387	719.901	246	712.404	320.235	733.41	1030.28	858.32	416.846	1140.6	437.811	943.455
1431191_a_at	Syt1	synaptotagmin I	575.819	905.188	266.851	750.141	412.907	637.658	387.784	453.757	75.5094	402.977	161.692	378.483	535.279	493.369	200.679	695.574	245.579	547.328
1452473_at	Prr15	proline rich 15	68.1877	59.917	98.6481	76.6899	100.07	97.6237	188.423	157.008	373.216	97.0519	621.914	167.901	134.648	138.321	364.037	71.6168	127.045	71.8048
1426734_at	Fam43a	family with sequence similarity 43, member A	666.248	487.047	808.353	590.942	846.064	681.563	1779.76	1175.6	3512.71	1257.53	3114.22	1442.64	1065.99	735.914	1662.46	603.827	983.628	616.437
1448823_at	Cxcl12	chemokine (C-X-C motif) ligand 12	94.2346	72.443	103.511	103.73	84.0673	74.1662	302.612	232.383	651.742	174.471	881.877	153.705	256.717	265.929	552.182	134.117	273.639	91.4872
1424383_at	Tmem51	transmembrane protein 51	316.375	200.714	250.248	183.783	207.69	151.171	325.292	279.025	714.28	287.43	1165.66	404.957	705.101	466.089	994.815	405.155	649.336	405.774
1444774_at	Det1	de-etiolated homolog 1 (Arabidopsis)	74.5224	57.6205	85.4178	70.914	79.3531	51.5369	95.845	72.451	266.266	54.8136	255.518	73.2285	79.5481	58.326	125.808	43.276	68.2793	60.2107
1436387_at	C330006P03Rik	RIKEN cDNA C330006P03 gene	65.0371	109.487	122.003	177.636	118.876	115.992	201.231	2229	316.324	4503.01	162.352	851.176	80.1152	2115.23	218.649	1408.14	135.289	403.405
1454220_at	9330185C12Rik	RIKEN cDNA 9330185C12 gene	154.45	105.072	153.894	106.217	146.105	135.434	242.841	208.223	435.131	196.284	525.396	171.917	178.043	115.861	290.765	106.887	175.467	98.3626
1450428_at	Lhx1	LIM homeobox protein 1	1718.42	1600.61	1946.6	1324.96	1482.11	1324.18	2118.87	1851.27	5622.48	1256.08	5039.68	1239.2	2472.11	1371.67	2922.99	1110.2	1713.25	1154.63
1423325_at	Pnn	pinin	560.506	579.854	131.117	608.14	160.799	448.69	365.514	408.063	122.018	347.843	292.978	265.557	404.271	380.925	192.419	458.726	142.695	478.993
1456818_at	LOC100047004 /// Stk32a	similar to serine/threonine kinase 32A /// serine/threonine kinase 32A	436.792	376.991	432.262	318.125	343.002	320.984	347.662	279.981	958.515	298.393	801.219	274.299	324.718	267.785	742.481	243.3	382.756	207.168
1442613_at	---	---	145.621	108.573	170.162	117.98	133.008	80.4368	87.039	122.682	273.167	87.2856	278.117	86.7187	156.259	100.253	221.989	83.0706	171.15	113.731
1418322_at	Crem	cAMP responsive element modulator	90.5013	136.491	111.164	112.866	87.6821	79.9521	70.7975	295.503	88.2167	404.199	90.2255	215.703	78.0953	359.57	185.838	327.461	116.584	239.315
1421594_a_at	Sytl2	synaptotagmin-like 2	335.895	337.834	289.253	339.514	322.378	351.691	220.918	206.396	48.5224	203.637	62.2568	217.486	254.999	290.556	67.2458	271.653	241.266	212.657
1434111_at	LOC100048050 /// Lphn2	similar to calcium-independent alpha-latrotoxin receptor homolog 2 /// latrophilin 2	425.059	466.253	351.641	464.346	415.167	497.899	346.134	369.356	176.63	413.035	171.712	415.321	364.08	495.412	228.846	489.832	417.834	546.34
1436461_at	---	---	165.042	226.443	157.205	182.329	145.455	175.674	129.041	134.547	28.5549	137.629	31.2025	153.636	122.525	146.91	37.984	170.737	145.941	171.038
1437029_at	Tacr3	tachykinin receptor 3	172.467	231.16	164.895	224.365	163.433	221.256	129.008	127.855	18.3314	138.91	18.5381	156.592	140.617	203.166	36.5802	212.661	123.398	132.207
1436127_at	Crhbp	corticotropin releasing hormone binding protein	178.967	229.919	116.263	206.636	148.237	231.094	106.105	171.264	10.1148	131.982	10.9578	145.06	102.664	179.2	10.3223	202.577	103.383	122.479
1442143_at	Ano4	anoctamin 4	213.257	279.524	251.765	275.22	218.423	258.712	166.656	187.253	53.1517	170.619	58.6178	170.563	188.263	194.676	50.5172	214.348	163.095	158.711
1423427_at	Adcyap1	adenylate cyclase activating polypeptide 1	303.27	264.225	279.39	302.622	281.826	310.493	193.138	208.711	47.2455	231.138	57.3134	255.871	164.244	207.495	98.5912	252.182	246.718	209.402
1419250_a_at	Pftk1	PFTAIRE protein kinase 1	215.119	217.663	95.3198	246.924	124.363	258.231	145.982	136.232	63.5693	126.671	57.1296	127.757	114.828	196.739	73.1964	218.58	111.062	194.148
1418610_at	Slc17a6	solute carrier family 17 (sodium-dependent inorganic phosphate cotransporter), member 6	783.037	1251.87	727.257	1180.48	879.119	822.719	756.987	638.346	74.5394	1053.88	170.97	1122.84	786.242	820.187	401.515	1233.98	941.611	895.106
1436141_at	---	---	435.298	462.018	343.622	393.835	386.464	406.45	398.001	374.144	55.5757	397.918	112.732	387.613	248.658	415.545	91.2657	371.489	349.782	385.847
1428379_at	Slc17a6	solute carrier family 17 (sodium-dependent inorganic phosphate cotransporter), member 6	5497.6	5230.7	3613.17	5159.98	4714.77	5597.06	4626.26	3761.51	488.015	4778.46	796.098	4718.27	2995.33	4073.83	1837.11	4985.01	4513.94	4192.86
1455965_at	Adamts4	a disintegrin-like and metallopeptidase (reprolysin type) with thrombospondin type 1 motif, 4	113.49	157.36	194.55	132.787	128.988	109.691	98.9036	87.2248	37.7452	100.94	30.5917	109.279	107.829	108.331	27.8719	104.314	88.3065	82.8322
1417920_at	Amn	amnionless	322.323	288.904	205.573	270.092	295.439	279.633	150.189	138.867	47.2115	156.354	52.1866	139.092	205.795	218.341	55.2527	198.341	188.553	192.581
1432418_a_at	Ckmt1	creatine kinase, mitochondrial 1, ubiquitous	588.587	532.836	256.326	484.072	356.294	516.187	392.978	423.773	78.3561	382.892	187.06	358.224	395.854	456.243	199.288	472.825	365.424	389.857
1422520_at	Nefm	neurofilament, medium polypeptide	2256.32	2371.58	1153.29	2075.49	1578.74	2218.38	1792.39	2163.71	702.592	2261.88	561.036	2256.36	1504.02	2417.34	1044.94	2437.58	1838.23	2198.5
1421863_at	E130112N10Rik /// Vamp1	RIKEN cDNA E130112N10 gene /// vesicle-associated membrane protein 1	912.391	938.167	456.795	903.018	700.664	863.278	641.954	724.875	154.661	685.97	182.864	726.797	607.675	825.458	181.842	792.101	628.662	739.497
1448553_at	Myh7	myosin, heavy polypeptide 7, cardiac muscle, beta	325.081	316.609	261.451	306.041	269.065	335.085	207.06	238.802	52.2235	280.534	105.087	279.87	250.916	262.038	115.048	304.222	283.822	318.729
1430511_at	Unc13c	unc-13 homolog C (C. elegans)	181.307	195.227	103.458	169.408	142.052	155.74	188.199	147.21	32.6281	136.914	45.2524	111.03	152.154	197.401	75.4778	153.011	134.062	158.829
1434672_at	Gpr22	G protein-coupled receptor 22	230.121	250.008	195.235	252.576	266.647	233.024	235.557	226.927	54.5736	209.93	47.7245	252.568	201.604	286.634	82.6763	243.719	157.984	210.216
1451680_at	Srxn1	sulfiredoxin 1 homolog (S. cerevisiae)	300.388	205.947	195.866	220.814	217.51	220.727	189.521	500.893	110.688	992.76	161.359	650.867	185.29	443.05	170.242	432.333	201.469	438.444
1437268_at	Lancl3	LanC lantibiotic synthetase component C-like 3 (bacterial)	197.774	289.559	233.74	279.829	218.592	220.51	214.709	221.906	24.7451	251.589	66.7622	244.353	251.972	226.515	81.7486	249.039	155.642	191.671
1449571_at	Trhr	thyrotropin releasing hormone receptor	370.633	390.152	278.264	382.031	364.985	401.313	339.921	454.131	30.5554	363.653	55.2513	387.565	322.479	460.656	170.223	434.505	308.706	352.766
1419021_at	Mcf2	mcf.2 transforming sequence	145.512	183.251	117.299	202.37	148.189	176.65	119.566	119.589	18.3117	150.373	36.4276	139.506	111.952	155.395	63.6697	160.076	110.071	128.47
1457048_at	Qrfpr	pyroglutamylated RFamide peptide receptor	390.367	399.124	317.722	460.474	343.984	474.215	413.655	444.528	120.853	499.977	117	547.717	497.723	487.072	166.809	495.576	275.048	450.739
1428397_at	B3galt5	UDP-Gal:betaGlcNAc beta 1,3-galactosyltransferase, polypeptide 5	325.281	369.641	283.789	416.474	315.625	367.993	290.995	284.756	96.065	285.997	119.69	317.494	276.229	254.345	84.5928	315.144	228.498	303.822
1434877_at	Nptx1	neuronal pentraxin 1	1109.65	1009.36	835.041	1130.68	938.965	1113.56	908.533	1415.42	458.162	2739.72	308.754	2124.79	810.846	1527.34	417.538	1344.63	917.708	1209.24
1436731_at	LOC100046959 /// Zfp385b	similar to zinc finger protein 533 /// zinc finger protein 385B	185.693	211.339	138.52	202.142	183.354	235.345	195.603	182.447	79.4589	210.739	51.3313	207.834	211.493	260.637	106.508	239.965	163.117	223.578
1439056_at	EG636791	predicted gene, EG636791	403.182	401.408	332.075	463.912	444.658	457.189	365.436	353.064	109.566	382.834	106.892	372.237	325.364	442.087	162.73	451.75	338.061	325.681
1434112_at	LOC100048050 /// Lphn2	similar to calcium-independent alpha-latrotoxin receptor homolog 2 /// latrophilin 2	780.643	975.641	560.131	922.951	694.165	916.563	785.762	796.47	374.252	851.333	364.949	833.686	733.656	953.652	439.64	1032.31	703.904	1075.17
1455123_at	St18	suppression of tumorigenicity 18	87.8026	160.173	190.193	174.793	169.24	181.863	115.965	97.6552	22.9025	117.12	46.224	119.829	109.923	132.046	61.2598	148.194	112.828	129.28
1421844_at	Il1rap	interleukin 1 receptor accessory protein	97.6392	138.784	138.715	132.55	114.451	146.067	98.655	112.831	50.6812	106.55	39.1556	129.055	78.9607	87.7998	39.1364	96.8018	79.3107	105.942
1419414_at	Gng13	guanine nucleotide binding protein (G protein), gamma 13	578.51	663.537	635.277	633.571	686.147	582.996	517.135	579.919	234.931	487.686	225.843	554.343	538.675	853.835	211.909	639.065	531.15	561.051
1417333_at	Rasa4	RAS p21 protein activator 4	64.0428	53.2496	61.1532	54.8163	52.1378	46.8829	77.519	68.6083	519.932	78.4385	229.638	63.4006	64.6254	55.7168	111.212	42.0166	75.2854	55.3158
1427126_at	Hspa1b	heat shock protein 1B	35.1175	107.829	48.7314	101.548	72.067	102.821	400.955	440.701	310.549	390.747	99.1403	318.005	71.6452	422.274	193.127	169.797	110.438	350.627
1423311_s_at	Tpbg	trophoblast glycoprotein	547.875	495.436	759.106	481.325	591.747	491.854	619.745	566.9	2565.55	495.615	1350.35	382.832	622.573	492.771	940.734	409.498	587.872	415.518
1428837_at	Klhl14	kelch-like 14 (Drosophila)	113.114	85.6466	101.224	74.1169	112.056	106.597	158.457	109.013	333.717	130.611	310.003	153.927	103.817	90.5822	164.36	77.296	130.658	81.8602
1421595_at	Fam184b	family with sequence similarity 184, member B	91.7768	78.6109	156.233	79.9934	141.117	92.3025	127.181	107.07	304.816	94.2534	315.612	103.657	137.85	120.637	207.471	83.1988	126.092	96.4846
1416041_at	Sgk1	serum/glucocorticoid regulated kinase 1	1015	2428.01	1261.44	2379	2363.17	2686.95	1188.95	1942.15	570.225	1798.52	892.345	1194.54	813.897	1267.59	665.394	1238.21	796.272	797.297
1453247_at	Zfp618	zinc fingerprotein 618	109.717	96.3457	102.071	64.7573	98.6616	72.0131	131.645	108.103	327.951	69.751	301.037	65.4464	113.127	87.4483	143.194	57.7947	107.992	62.1878
1446571_at	---	---	68.2343	72.297	70.3014	69.3331	68.9921	70.6381	85.4452	64.515	201.157	89.9383	255.216	66.0436	123.295	78.7894	173.511	55.4802	101.345	75.4565
1433909_at	Syt17	synaptotagmin XVII	1179.56	1024.45	1111.78	896.532	1096.48	980.392	1915.59	1871.84	5329.67	1550.92	4458.28	1134.38	2018.03	1636.16	2630.18	1183.65	1730.86	953.3
1418257_at	Slc12a7	solute carrier family 12, member 7	347.131	205.316	376.125	201.856	313.777	250.709	263.96	263.127	923.549	293.86	868.077	381.216	319.873	244.132	562.621	206.985	394.174	322.078
1455591_at	Zfp618	zinc fingerprotein 618	252.798	256.483	280.609	194.048	263.076	219.913	391.886	387.045	906.384	263.604	939.547	298.731	387.425	300.777	569.413	186.377	271.311	210.381
1457265_at	Sfrs17b	splicing factor, arginine/serine-rich 17b	1847.09	1438.55	1693.96	1522.34	1629.05	1583.19	2864.9	2521.66	6377.95	2121.77	5912.46	2277.43	2434.51	1972.11	3654.78	1615.98	2358.83	1799.83
1458539_at	R3hdm1	R3H domain 1 (binds single-stranded nucleic acids)	363.89	425.233	135.549	383.966	189.017	276.978	322.913	313.959	55.8037	279.791	144.837	228.899	263.892	335.722	148.33	317.243	120.077	299.945
1439086_at	A930009L07Rik	RIKEN cDNA A930009L07 gene	1224.23	986.684	429.639	685.674	621.355	1022.91	639.295	771.718	149.475	743.167	211.837	659.122	723.063	769.713	480.473	781.799	575.852	850.024
1424007_at	Gdf10	growth differentiation factor 10	189.936	218.779	192.605	176.941	248.741	254.234	374.865	231.61	611.81	280.342	505.345	186.238	190.119	212.884	521.073	138.113	282.119	157.134
1456187_at	Slc7a14	solute carrier family 7 (cationic amino acid transporter, y+ system), member 14	250.489	232.732	183.24	173.521	211.545	182.138	202.319	197.268	48.1774	216.736	28.0576	223.979	198.03	184.517	66.3805	119.5	109.058	230.47
1427822_a_at	Copg2as2	coatomer protein complex, subunit gamma 2, antisense 2	4123.25	5098.49	2315.11	4724.76	2895.07	3379.84	3908.73	3862.55	1072.52	3481.75	1166.42	3178.08	4374.77	3735.56	2005.4	4771.49	2466.01	4540.2
1436578_at	Ermn	ermin, ERM-like protein	375.452	517.104	599.95	499.389	388.899	442.033	356.385	348.52	170.254	368.092	173.806	433.025	337.32	331.332	99.1064	369.144	300.693	365.782
1437230_at	Kcna1	potassium voltage-gated channel, shaker-related subfamily, member 1	117.62	170.235	112.685	163.747	116.748	174.729	96.3403	102.477	53.8384	109.214	26.8939	117.968	89.4627	131.103	37.2967	110.85	69.8809	114.986
1452517_at	Plekhh1	pleckstrin homology domain containing, family H (with MyTH4 domain) member 1	216.93	365.312	290.202	270.582	234.264	234.749	230.274	229.806	75.5111	232.682	97.0295	238.074	223.477	169.321	73.1345	223.738	188.132	233.134
1416783_at	Tac1	tachykinin 1	3125.45	3264.85	3067.26	3102.05	2395.71	3025.34	1840.65	1682.94	1007.14	2660.35	460.64	2429.64	1588.11	2243.94	614.431	3180.91	2387.91	2290.26
1441778_at	Adcyap1	Adenylate cyclase activating polypeptide 1 (Adcyap1), mRNA	217.016	250.527	268.682	246.652	270.428	234.325	168.199	158.927	17.7424	191.956	43.5509	216.784	160.403	172.741	79.3241	199.036	212.08	141.208
1440413_at	A830006F12Rik	RIKEN cDNA A830006F12 gene	277.3	388.449	205.261	350.668	284.807	308.851	285.034	391.114	34.4884	286.424	65.9234	317.314	260.242	338.128	168.451	356.607	235.255	312.531
1450121_at	Scn1a	sodium channel, voltage-gated, type I, alpha	2668.61	2624.42	1515.57	2462.56	2058.66	2430.96	2210.6	2397.3	747.431	2148.88	950.207	2226.26	2012.69	2539.94	1190.84	2416.46	1954.02	2063.88
1438628_x_at	Cntn3	contactin 3	150.496	156.639	183.27	256.24	216.381	275.12	256.721	157.177	89.2745	249.927	56.205	248.594	203.641	243.807	102.991	274.548	191.16	229.891
1460449_at	Anks1b	ankyrin repeat and sterile alpha motif domain containing 1B	1295.45	1474.13	1655.31	2206.9	1907.78	2402.2	1973.36	1539.19	594.24	1715.53	546.761	1872.45	1518.18	2211.49	961.084	2048.83	1478.9	1615.48
1438033_at	Tef	thyrotroph embryonic factor	312.655	375.891	134.126	317.682	132.08	225.896	199.96	148.409	50.5196	143.99	67.6037	119.032	196.43	160.075	102.34	211.036	144.778	267.372
1428573_at	Chn2	chimerin (chimaerin) 2	583.644	614.091	662.236	672.046	601.226	632.047	455.551	531.329	260.242	585.098	222.455	556.383	488.554	633.212	301.602	650.11	549.386	578.137
1452444_at	Napb	N-ethylmaleimide sensitive fusion protein attachment protein beta	443.845	429.406	241.533	522.716	363.124	598.769	421.376	450.457	56.5277	420.389	193.841	356.998	391.08	469.506	235.031	509.394	290.743	421.226
1447329_at	---	---	285.139	200.456	259.425	85.2219	194.229	149.718	237.897	303.651	2088.74	285.402	1104.27	230.544	528.317	343.27	991.943	219.99	570.709	567.791
1440728_at	---	---	70.2861	74.739	73.4595	76.226	74.715	74.5203	161.347	129.953	339.261	114.029	346.28	75.354	123.428	90.0333	141.68	70.7521	128.137	83.1811
1436335_at	Plch2	phospholipase C, eta 2	547.209	367.005	325.274	295.171	359.518	319.012	665.854	674.671	1901.11	532.35	1373.94	418.835	614.783	474.795	786.818	346.261	512.564	361.219
1456096_at	6430573F11Rik	RIKEN cDNA 6430573F11 gene	133.99	80.349	118.798	111.616	115.149	120.532	250.257	197.347	715.617	146.615	446.656	173.648	199.597	132.302	256.944	106.691	175.986	95.7468
1430143_at	4930426D05Rik	RIKEN cDNA 4930426D05 gene	268.49	139.234	138.845	170.66	126.01	167.237	220.739	198.242	749.724	261.541	598.386	209.861	219.285	185.105	434.705	176.203	250.361	217.526
1429725_at	Zfhx3	zinc finger homeobox 3	68.1762	87.2144	126.415	36.166	127.7	89.0077	104.83	85.4136	349.678	88.8325	243.018	98.9215	102.129	89.0111	155.044	78.068	88.4878	108.623
1436444_at	6030405A18Rik	RIKEN cDNA 6030405A18 gene	192.99	148.769	221.116	189.944	245.588	239.597	425.252	279.401	928.459	120.944	816.836	265.878	218.686	187.126	223.936	144.885	178.72	104.405
1426851_a_at	Nov	nephroblastoma overexpressed gene	788.611	818.283	1607.89	1160.77	1306.98	1184.23	2242.61	1943.35	4196.76	1435.44	2893.25	1187.26	888.744	988.018	1955.63	661.759	1232.13	783.813
1423312_at	Tpbg	trophoblast glycoprotein	141.489	126.215	215.419	131.063	173.145	138.656	147.543	131.989	285.427	128.614	308.475	135.47	121.992	123.675	202.042	103.632	131.055	88.6948
1449245_at	Grin2c	glutamate receptor, ionotropic, NMDA2C (epsilon 3)	271.237	198.652	244.644	176.341	230.122	167.418	301.476	263.84	956.92	287.139	611.011	275.144	294.243	225.935	411.996	204.081	290.644	226.353
1455116_at	Relt	RELT tumor necrosis factor receptor	143.603	93.2045	152.662	100.165	154.794	132.338	160.391	151.161	560.214	135.834	348.201	157.969	164.184	106.078	217.932	112.506	164.266	142.283
1444198_at	---	---	128.439	129.629	99.3973	123.808	97.6767	125.372	125.564	156.391	336.476	110.135	414.414	116.547	212.481	102.945	244.949	101.078	189.148	158.655
1435460_at	Prkg2	protein kinase, cGMP-dependent, type II	482.246	359.344	539.702	339.176	547.067	404.735	867.784	892.356	1617.79	697.413	1924.83	656.164	710.576	556.51	1028.28	351.908	503.342	449.22
1422955_at	Syt17	synaptotagmin XVII	221.458	179.968	242.462	178.295	235.266	186.522	420.229	384.47	743.284	252.627	832.929	197.906	403.667	348.987	510.49	249.427	305.818	151.57
1435162_at	Prkg2	protein kinase, cGMP-dependent, type II	460.854	373.251	635.938	413.706	618.592	505.465	1068.83	963.757	1971.11	785.614	2144.84	728.186	739.726	595.544	930.442	468.714	584.029	439.936
1440371_at	---	---	1054.31	1001.32	1291.56	796.926	1051.75	903.948	1245.67	1334.92	3544.19	1088.44	2744.66	1154.55	1256.77	1123.72	1887.7	839.343	1394.16	1085.28
1424214_at	9130213B05Rik	RIKEN cDNA 9130213B05 gene	709.455	597.498	945.857	462.979	659.835	492.076	712.637	736.103	2438.35	585.257	1578.51	538.935	899.011	772.452	1076.98	583.731	932.466	658.021
1418349_at	Hbegf	heparin-binding EGF-like growth factor	247.013	212.876	294.461	205.106	256.878	213.23	331.001	263.279	670.07	282.008	791.894	289.439	264.481	253.152	356.233	189.071	286.689	146.284
1452834_at	2600010E01Rik	RIKEN cDNA 2600010E01 gene	356.7	336.674	509.678	293.443	392.798	325.624	505.212	516.373	1117.9	500.305	1058.82	406.042	482.819	367.669	664.348	258.364	448.761	352.506
1455629_at	Drd1a	dopamine receptor D1A	728.331	569.297	782.077	498.577	649.776	553.146	536.304	623.479	1182.03	698.741	1141.39	520.275	653.343	501.987	1087.85	518.397	676.667	509.059
1441161_at	B230216G23Rik	RIKEN cDNA B230216G23 gene	181.039	105.992	174.047	101.286	138.377	127.192	201.796	164.852	427.189	138.12	366.633	138.021	160.244	135.192	260.137	83.1648	177.021	142.187
1429625_at	2900054C01Rik	RIKEN cDNA 2900054C01 gene	1063.9	1090.44	1385.65	1043.14	1359.41	1193.18	1865.89	1839.98	3010.79	1245.77	2924.11	1444.87	1452.23	1389.06	2252.32	1084.06	1288.13	1032.96
1460043_at	---	---	5310.21	4363.83	5858.86	4475.63	4945.06	4875.68	4976.35	5242.22	12227.3	5353.17	10720.1	5480	4857.62	3979.66	8091.41	3802.84	5259.49	4525.3
1420650_at	Zfhx3	zinc finger homeobox 3	324.863	330.145	654.62	229.853	601.18	272.655	380.03	376.154	1003.15	320.975	764.113	392.976	550.822	366.579	558.021	336.776	478.467	386.195
1452717_at	Slc25a24	solute carrier family 25 (mitochondrial carrier, phosphate carrier), member 24	241.676	163.637	292.665	254.474	282.277	236.763	321.487	292.094	661.885	236.676	579.236	288.568	292.967	278.586	521.291	219.17	344.962	234.856
1438051_at	Ttc14	tetratricopeptide repeat domain 14	169.003	215.373	69.1843	215.706	95.3407	240.513	213.838	219.412	89.2005	167.556	95.5937	114.521	180.865	159.055	100.254	174.893	120.854	196.242
1425600_a_at	Plcb1	phospholipase C, beta 1	147.864	221.746	93.5282	174.524	106.657	132.538	140.779	154.641	55.957	124.594	71.1394	121.228	162.54	145.573	77.544	172.518	76.6687	166.003
1449031_at	Cited1	Cbp/p300-interacting transactivator with Glu/Asp-rich carboxy-terminal domain 1	218.62	279.705	328.718	261.321	203.095	222.574	215.749	221.085	72.7147	196.264	61.6039	215.077	246.824	244.796	125.826	251.255	228.088	272.743
1453571_at	Depdc6	DEP domain containing 6	134.002	198.925	240.027	154.368	187.908	190.356	134.309	133.812	58.2428	152.513	72.3848	195.01	143.021	174.134	86.3925	168.914	124.226	186.679
1419033_at	2610018G03Rik	RIKEN cDNA 2610018G03 gene	209.956	249.316	166.941	258.838	273.991	307.164	239.731	268.577	82.5204	295.902	71.398	300.253	213.107	299.288	182.233	373.395	305.857	276.536
1426063_a_at	Gem	GTP binding protein (gene overexpressed in skeletal muscle)	70.2809	140.485	91.2935	82.7445	89.5434	58.3915	60.1704	639.64	64.4868	367.38	48.4948	74.9832	145.738	630.93	225.838	335.367	188.674	179.592
1455785_at	Kcna1	potassium voltage-gated channel, shaker-related subfamily, member 1	559.704	694.647	611.345	563.407	540.199	603.064	371.405	383.384	244.443	430.408	175.77	501.24	430.431	522.6	151.158	456.581	421.307	449.932
1428393_at	Nrn1	neuritin 1	804.467	534.522	275.575	580.779	578.523	669.135	538.559	523.592	105.667	682.777	140.532	660.769	424.549	838.565	367.097	700.811	690.788	693.536
1460219_at	Mag	myelin-associated glycoprotein	896.392	1205.84	1260.02	1073.56	927.902	990.591	641.486	520.898	268.404	574.436	299.71	659.938	743.937	677.459	205.622	743.079	597.786	627.667
1439633_at	Syt7	synaptotagmin VII	198.741	233.937	132.736	188.177	161.286	187.179	170.065	193.946	86.0525	217.353	83.0645	234.36	187.331	305.512	141.008	237.711	190.145	244.552
1427470_s_at	Napb	N-ethylmaleimide sensitive fusion protein attachment protein beta	1915.82	1956.11	839.963	1689.95	1347.27	1923.79	1416.61	1589.15	324.947	1407.89	601.366	1152.74	1554.12	1662.68	984.251	1658.74	1111.96	1435.52
1455034_at	Nr4a2	nuclear receptor subfamily 4, group A, member 2	197.525	415.372	224.084	242.456	232.751	236.841	185.158	2001.18	117.245	662.862	143.375	172.694	237.799	2142.89	351.277	823.085	319.619	277.292
1419647_a_at	Ier3	immediate early response 3	403.662	381.977	315.966	441.697	354.828	325.558	292.048	405.3	143.606	285.125	126.227	228.712	316.03	378.264	151.572	319.603	312.828	390.088
1422562_at	Rrad	Ras-related associated with diabetes	88.1427	99.385	79.1569	81.0175	64.2958	50.435	61.7917	2384.61	55.6385	1165.65	51.9278	123.564	66.362	1121.07	92.5081	366.56	86.6654	97.6906
1456764_at	Slc35f3	solute carrier family 35, member F3	401.975	460.117	344.323	532.21	456.756	515.975	377.268	364.36	90.6795	393.997	113.26	502.47	372.834	442.324	234.226	525.847	370.099	438.607
1426951_at	Crim1	cysteine rich transmembrane BMP regulator 1 (chordin like)	871.445	852.543	512.246	793.808	586.23	817.535	721.56	817.761	212.975	677.603	258.966	779.506	705.814	870.178	450.922	902.42	634.849	724.497
1435307_at	Ankrd34b	ankyrin repeat domain 34B	2345.9	2409.2	2000.1	2978.06	2448.78	2822.75	2242.42	2308.06	693.243	2493.05	827.608	2569.73	1981.21	2282.71	1287.52	2663.15	1952.81	2370.83
1438217_at	A2bp1	ataxin 2 binding protein 1	594.311	697.825	452.752	617.325	475.35	515.923	439.814	466.813	216.76	426.917	129.032	460.789	487.673	627.701	280.801	574.579	380.729	481.955
1445669_at	Spry4	sprouty homolog 4 (Drosophila)	215.15	236.352	245.139	283.661	213.923	287.998	233.332	545.386	78.1292	658.765	71.7059	201.965	180.927	590.352	203.73	348.117	205.962	223.856
1417051_at	Pcdh8	protocadherin 8	1615.8	1729.57	1556.6	2028.61	1843.32	1965.05	1748.5	1870.97	833.952	1831.59	771.692	1953.04	1638.23	2007.68	920.081	1822.04	1365.84	1799.3
1455197_at	Rnd1	Rho family GTPase 1	203.024	214.852	147.734	223.367	208.554	220.807	217.153	212.885	48.6291	195.118	61.4298	210.611	162.476	280.566	92.9269	184.929	177.35	156.877
1449422_at	Cdh4	cadherin 4	350.37	468.59	370.462	350.177	449.934	399.356	327.698	377.497	170.356	346.052	123.81	395.465	386.628	392.482	223.799	409.468	339.748	454.092
1438112_at	9430021M05Rik	RIKEN cDNA 9430021M05 gene	154.649	169.697	221.868	180.568	183.613	184.329	136.626	130.272	78.872	161.748	58.498	202.399	180.914	144.001	73.0471	173.147	160.866	165.938
1434728_at	Gria3	glutamate receptor, ionotropic, AMPA3 (alpha 3)	1437.65	2042.32	1120.11	1766.08	1528.19	1665.64	1754.34	1772.52	456.646	1669.71	549.964	1498.92	1480.78	2085.96	1016.73	1574.24	1311.08	1357.3
1451840_at	Kcnip4	Kv channel interacting protein 4	930.441	918.32	719.844	1090.61	834.945	1021.63	832.518	897.954	248.281	874.901	346.579	985.627	826.043	916.325	527.59	1080.3	775.461	1016.37
1455271_at	OTTMUSG00000014994	predicted gene, OTTMUSG00000014994	117.87	142.224	141.358	169.832	123.16	128.468	146.51	391.183	175.483	374.734	170.832	143.724	170.626	334.082	115.086	235.082	135.47	111.374
1423348_at	Fzd8	frizzled homolog 8 (Drosophila)	114.826	101.531	107.806	105.939	140.093	115.028	272.021	91.1336	467.18	113.066	314.991	173.888	139.072	93.1909	112.894	78.1438	113.278	69.1113
1452433_at	---	---	108.792	108.648	99.5225	62.5353	109.285	70.2589	104.449	122.238	507.241	115.527	285.13	94.3707	175.89	106.975	251.023	97.7268	166.742	187.188
1421354_at	Prkg2	protein kinase, cGMP-dependent, type II	102.813	67.9515	127.051	91.2009	111.137	122.806	230.458	219.038	370.635	165.353	451.665	150.242	163.43	134.883	211.94	109.631	132.173	96.2335
1438796_at	Nr4a3	nuclear receptor subfamily 4, group A, member 3	1095.05	1037.59	1113.67	861.926	606.464	564.95	404.05	3413.39	583.769	1409.98	692.079	512.564	1206.46	2969.27	1827.02	1186.86	1005.82	779.326
1416505_at	Nr4a1	nuclear receptor subfamily 4, group A, member 1	406.482	708.914	362.172	288.185	216.982	177.067	165.995	4401.74	166.224	297.994	153.219	120.837	645.336	1500.71	479.312	312.407	264.01	221.791
1447096_at	---	---	66.8802	114.13	93.3059	109.789	105.233	141.846	164.212	119.748	366.573	124.445	520.311	129.939	182.59	104.902	265.896	98.9238	181.442	146.287
1450977_s_at	Ndrg1	N-myc downstream regulated gene 1	284.261	214.844	301.294	179.211	221.66	196.559	304.547	262.568	690.477	212.297	549.56	206.302	226.351	174.655	205.094	175.032	145.9	197.726
1454795_at	Cobll1	Cobl-like 1	640.296	554.906	816.834	752.255	781.733	884.841	1982.26	1618.51	2381.06	1092.67	2617.17	1198.49	1007.91	992.689	1445.21	671.11	974.173	648.66
1429678_at	5730508B09Rik	RIKEN cDNA 5730508B09 gene	91.4462	81.4416	126.502	114.16	134.652	123.015	192.393	159.706	403.696	179.945	312.575	190.785	135.235	121.999	284.006	107.819	202.32	109.552
1435282_at	Gm967	gene model 967, (NCBI)	205.297	178.687	283.659	188.513	243.428	154.221	192.075	193.222	713.118	152.169	398.045	188.046	278.283	155.253	267.854	168.176	208.706	163.525
1439629_at	Nrxn3	neurexin III	119.099	131.885	66.928	101.912	82.9208	53.0477	192.275	179.742	242.021	139.045	325.429	112.201	191.446	154.577	269.307	79.7781	110.761	130.883
1450976_at	Ndrg1	N-myc downstream regulated gene 1	1118.45	896.781	1350.65	889.12	1042.68	1028.24	1334.49	1356.52	4379.18	1229.15	2723.34	1125.1	1068.2	884.822	1411.17	911.203	1117.96	1019.41
1440980_at	Kcnh8	potassium voltage-gated channel, subfamily H (eag-related), member 8	331.653	264.188	298.268	228.939	348.668	265.488	490.827	433.347	810.55	447.564	817.451	593.68	312.762	254.81	592.336	207.321	300.407	272.081
1419417_at	Vegfc	vascular endothelial growth factor C	91.8036	94.2184	111.588	101.637	120.984	110.973	154.003	162.598	313.751	104.81	257.816	110.092	115.074	92.0863	123.333	63.0219	99.9121	58.1838
1439766_x_at	Vegfc	vascular endothelial growth factor C	265.433	214.357	348.972	296.724	387.425	293.961	469.125	456.103	586.644	245.624	646.598	350.847	273.2	295.267	321.213	160.548	250.353	149.965
1423310_at	Tpbg	trophoblast glycoprotein	614.534	605.447	976.758	608.484	855.497	700.889	912.506	745.64	2028.68	690.021	1540.13	611.281	758.346	677.918	1004.93	568.023	742.848	609.892
1455604_at	Fzd5	frizzled homolog 5 (Drosophila)	216.526	202.482	229.568	138.564	172.154	129.772	225.826	201.201	299.944	151.813	444.771	203.204	271.409	172.802	467.406	131.367	287.021	127.06
1450990_at	Gpc3	glypican 3	570.414	372.078	430.411	336.662	384.145	338.271	349.49	424.178	705.572	401.623	889.094	393.657	481.219	406.64	924.146	375.925	584.022	402.83
1427122_at	Copg2as2	coatomer protein complex, subunit gamma 2, antisense 2	516.437	647.152	422.239	604.211	471.854	566.473	887.209	626.116	258.239	547.47	135.675	487.813	550.326	716.654	265.687	475.102	403.811	419.986
1436190_at	Zfp618	zinc fingerprotein 618	154.392	153.688	182.219	117.427	160.47	129.09	244.178	205.997	468.554	145.767	434.387	147.43	215.441	187.609	239.875	156.094	180.091	148.219
1421943_at	Tgfa	transforming growth factor alpha	1052.06	796.228	1150.78	786.479	932.859	812.453	969.838	887.38	2089.03	1003.13	1963.58	1034.29	989.331	760.842	1661.52	776.374	1109.2	887.507
1439232_at	---	---	404.864	337.816	547.11	317.398	407.226	283.134	478.98	378.347	963.711	300.368	883.263	258.9	562.168	378.408	525.811	304.299	406.889	315.37
1435175_at	BC034090	cDNA sequence BC034090	100.099	91.3757	108.738	93.6451	110.868	84.5964	129.763	119.728	272.693	111.977	266.834	94.7902	137.71	103.212	179.317	89.9651	125.186	113.981
1449240_at	Gsbs	G substrate	759.515	520.698	976.532	625.84	701.101	603.783	1051.96	1005.67	2214.11	877.291	1914.19	711.773	1100.1	790.633	1573.32	768.535	1013.34	696.406
1426061_x_at	---	---	390.49	440.946	449.142	311.087	413.429	339.683	489.843	551.779	1008.99	426.179	1034.58	435.97	571.088	513.304	851.407	335.288	591.415	526.276
1457686_at	Sfrs17b	splicing factor, arginine/serine-rich 17b	860.033	694.029	760.533	613.217	739.353	684.407	1156.64	1082.34	2054.84	865.036	2354.07	904.204	1128.84	945.698	1315.51	651.241	914.447	758.783
1428221_at	Klhdc8b	kelch domain containing 8B	535.189	417.646	457.667	389.895	396.034	375.337	554.019	362.357	1071.06	336.325	773.305	369.465	654.554	496.436	699.949	396.549	571.78	354.406
1429909_at	2600010E01Rik	RIKEN cDNA 2600010E01 gene	222.379	184.116	337.858	196.026	237.059	213.715	269.06	212.234	570.099	296.849	537.085	304.663	272.583	231.663	399.723	188.07	314.025	194.51
1443882_at	---	---	155.149	140.363	217.189	108.043	168.294	179.422	141.469	121.408	249.844	115.371	242.774	180.334	148.106	135.146	250.619	93.474	168.273	175.452
1419155_a_at	Sox4	SRY-box containing gene 4	113.009	135.268	191.195	106.482	162.031	98.1073	135.197	81.5062	348.516	85.7191	218.308	114.387	137.997	137.165	153.67	115.981	175.516	82.9289
1419238_at	Abca7	ATP-binding cassette, sub-family A (ABC1), member 7	111.992	92.9002	80.8155	83.0798	90.1142	84.3101	145.029	115.358	210.999	132.532	246.123	102.158	144.883	110.385	207.076	93.4792	138.612	99.0438
1445874_at	---	---	97.9198	114.102	68.1307	104.714	67.4156	84.6016	85.492	278.056	213.068	128.048	363.284	56.3961	271.974	218.125	390.926	111.43	236.889	153.457
1427195_at	---	---	130.062	78.0512	113.38	96.7534	118.129	106.501	98.6215	93.7437	194.94	84.267	219.255	126.882	110.65	75.0017	172.488	105.823	128.995	132.986
1419517_at	Cnih3	cornichon homolog 3 (Drosophila)	157.864	159.581	262.295	143.181	180.064	136.529	163.332	171.132	415.947	140.807	334.221	138.315	279.702	226.719	204.535	172.665	188.478	138.369
1437934_at	Tia1	cytotoxic granule-associated RNA binding protein 1	100.686	123.409	103.571	77.7765	90.8482	102.015	150.657	81.6767	227.465	98.2563	189.717	107.032	126.343	80.823	177.297	88.55	126.201	113.271
1438407_at	Dsel	dermatan sulfate epimerase-like	1009.82	964.102	1166.79	966.58	1030.85	934.187	1608.97	1505.47	2293.07	1058.01	2780.98	1246.15	1821.09	1387.03	2263.44	1102.18	1461.35	920.938
1416029_at	Klf10	Kruppel-like factor 10	69.5719	67.1397	102.977	90.7068	87.7381	90.4157	87.5445	349.431	96.6081	249.72	87.8292	103.317	71.4417	249.584	106.12	124.53	85.1267	95.3662
1456080_a_at	Serinc3	serine incorporator 3	457.228	434.559	128.757	545.447	270.352	527.136	492.218	503.441	94.1778	440.517	326.936	435.023	304.35	405.919	231.608	430.48	229.058	241.884
1428622_at	Depdc6	DEP domain containing 6	171.24	180.998	206.163	169.815	139.633	162.626	121.16	142.47	71.4272	126.132	58.046	173.256	127.984	143.615	77.9447	176.013	128.789	169.319
1418599_at	Col11a1	collagen, type XI, alpha 1	273.693	308.327	121.714	300.831	132.03	258.667	221.956	250.585	150.562	208.839	152.103	198.587	267.637	263.338	153.225	284.377	173.137	246.976
1442077_at	2310076G05Rik	RIKEN cDNA 2310076G05 gene	339.646	485.939	423.547	599.711	504.811	506.543	604.813	644.043	270.829	575.383	249.848	609.856	384.202	554.927	379.869	606.251	429.668	485.323
1450723_at	Isl1	ISL1 transcription factor, LIM/homeodomain	221.676	303.305	280.949	378.672	260.172	292.122	232.06	239.331	93.4746	219.669	90.6531	223.58	252.993	221.911	328.282	376.208	273.425	252.045
1436944_x_at	4933439C20Rik /// LOC236604 /// Pisd	RIKEN cDNA 4933439C20 gene /// phosphatidylserine decarboxylase pseudogene /// phosphatidylserine decarboxylase	3780.79	4709.91	2664.86	5378.07	1536	4711.8	4816.59	4336.06	3014.68	2485.37	3350.76	2758.71	4058.72	4167	2812.99	4321.28	1782.25	4066.31
1416785_at	Kcnip1	Kv channel-interacting protein 1	297.013	420.433	234.061	329.321	241.335	319.358	229.258	287.472	59.6156	229.66	90.1836	255.218	238.041	241.209	183.684	306.84	244.77	264.265
1436202_at	Malat1	metastasis associated lung adenocarcinoma transcript 1 (non-coding RNA)	267.038	242.219	91.5632	251.647	111.986	222.062	170.111	345.661	212.608	198.641	240.13	210.936	281.53	266.588	279.194	225.267	191.119	233.825
1457733_at	---	---	307.29	343.454	303.362	344.671	334.194	395.482	323.354	324.041	116.148	328.294	95.2763	440.621	340.607	348.724	201.797	376.397	303.517	368.299
1441101_at	Hecw1	HECT, C2 and WW domain containing E3 ubiquitin protein ligase 1	246.961	272.414	125.876	258.009	191.922	313.342	250.204	253.093	43.0741	250.903	85.822	229.278	187.496	259.399	124.556	252.023	140.253	245.328
1432558_a_at	Mal	myelin and lymphocyte protein, T-cell differentiation protein	1401.41	2678.35	2759.03	2419.12	1976.22	1760.39	1527.69	1378.13	578.683	1473.33	774.759	1733.13	1833.1	1523.37	571.567	1953.61	1578.26	1842.91
1418472_at	Aspa	aspartoacylase	474.14	695.033	791.653	573.28	524.054	535.823	385.185	349.616	161.743	352.755	195.692	412.628	415.081	391.01	160.703	432.745	413.754	436.272
1417406_at	Sertad1	SERTA domain containing 1	109.398	106.423	125.578	96.092	127.711	84.0091	105.216	450.845	84.8128	283.573	92.703	103.493	78.9253	348.218	95.8328	144.289	95.8417	95.7661
1422168_a_at	Bdnf	brain derived neurotrophic factor	343.944	296.053	250.56	264.531	303.586	413.828	191.025	191.017	114.405	260.948	97.7509	249.907	122.583	248.919	119.75	253.597	269.822	267.598
1445124_at	A930009L07Rik	RIKEN cDNA A930009L07 gene	1649.33	1625.96	1196.72	1444.6	1678.31	1675.28	1285.32	1333.14	548.813	1600.18	643.09	1613.78	1402.54	1485.51	1342.54	1591.51	1728.34	1685.31
1427189_at	Arih1	ariadne ubiquitin-conjugating enzyme E2 binding protein homolog 1 (Drosophila)	154.865	146.025	53.4884	145.196	105.432	127.517	116.069	225.099	74.9577	279.611	79.2632	140.389	84.2824	201.518	97.1648	172.02	61.9847	110.837
1459723_at	Zdhhc22	zinc finger, DHHC-type containing 22	279.911	297.418	266.195	288.92	294.556	314.702	248.913	249.076	72.3049	243.43	100.748	291.054	260.597	277.165	199.742	318.411	267.652	295.336
1417394_at	Klf4	Kruppel-like factor 4 (gut)	102.65	221.41	123.349	182.649	124.126	160.989	109.333	1190.18	102.54	225.741	135.031	109.336	97.3427	581.588	119.609	168.483	144.034	129.687
1452761_a_at	8430436O14Rik	RIKEN cDNA 8430436O14 gene	247.739	332.831	286.615	273.685	279.439	273.177	234.7	237.97	93.5273	226.998	98.1056	280.584	272.334	310.379	277.194	367.429	274.12	313.007
1436465_at	Klhl1	kelch-like 1 (Drosophila)	120.24	125.714	141.789	116.926	128.637	133.063	113.126	130.042	60.7509	122.794	57.9271	139.883	128.08	155.155	107.227	138.981	139.662	138.332
1459377_at	Akap2 /// Palm2 /// Palm2-akap2	A kinase (PRKA) anchor protein 2 /// paralemmin 2 /// Palm2-Akap2 protein	85.5553	175.093	134.836	171.226	143.744	136.027	166.19	164.808	55.0612	143.135	77.9242	215.724	148.627	218.724	80.5554	210.706	82.8742	153.133
1450249_s_at	Kif5a /// Kif5c	kinesin family member 5A /// kinesin family member 5C	197.031	221.379	161.643	156.483	203.069	161.719	148.994	147.431	73.9209	162.477	73.2047	138.787	169.947	197.482	55.1225	162.76	111.227	155.051
1417954_at	Sst	somatostatin	2829.22	3919.75	3425.95	3391.43	3549.86	3751.07	2439.75	2687.53	1557.74	3050.95	1280.19	3006.01	4710.86	3738.19	1708.94	5001.91	3316.88	5261.26
1444286_at	---	---	1602.84	1561.02	939.964	1392.67	1541.38	1697.04	1286.75	1210.43	321.073	1429.09	436.871	1479.62	1346.82	1428.17	997.133	1613.71	1592.18	1789.36
1455304_at	Unc13c	unc-13 homolog C (C. elegans)	720.972	740.854	601.793	779.626	786.708	848.958	659.381	676.773	247.992	758.898	328.243	728.992	596.048	747.903	508.308	793.563	732.56	806.134
1434800_at	Sv2b	synaptic vesicle glycoprotein 2 b	655.273	626.949	506.301	694.699	581.681	681.069	552.899	572.884	335.712	633.158	209.315	704.408	551.47	893.071	302.564	705.344	513.755	598.307
1451236_at	Rerg	RAS-like, estrogen-regulated, growth-inhibitor	195.297	187.211	190.362	223.603	244.915	216.696	185.56	173.196	48.2139	186.476	53.6615	204.521	139.222	217.967	123.658	228.104	187.82	198.012
1448459_at	Kcnip1	Kv channel-interacting protein 1	574.672	693.546	630.347	880.268	706.281	721.325	524.844	545.966	152.553	598.136	119.949	572.151	567.85	552.271	445.792	740.254	665.429	634.582
1426318_at	Serpinb1b	serine (or cysteine) peptidase inhibitor, clade B, member 1b	428.172	329.297	188.653	385.238	453.473	452.421	363.691	273.178	58.1384	434.666	108.195	473.825	379.844	417.433	251.375	430.718	433.888	435.01
1428077_at	LOC100047091 /// Tmem163	hypothetical protein LOC100047091 /// transmembrane protein 163	376.503	405.389	307.996	317.894	320.861	351.311	270.937	289.474	133.04	281.132	129.61	274.122	302.549	308.924	253.842	350.323	356.926	319.768
1437319_at	Unc13c	unc-13 homolog C (C. elegans)	327.887	438.477	411.077	399.284	485.934	434.393	351.005	440.228	94.9777	426.072	133.347	433.645	330.953	454.841	243.174	405.184	377.424	398.467
1427482_a_at	Car8 /// LOC676792	carbonic anhydrase 8 /// similar to Carbonic anhydrase-related protein (CARP) (CA-VIII)	343.094	379.32	546.16	461.343	460.265	442.031	375.853	376.924	109.078	418.215	129.487	366.976	321.927	411.924	218.422	407.478	355.794	344.189
1438531_at	A730054J21Rik	RIKEN cDNA A730054J21 gene	389.129	470.192	417.584	445.767	491.648	581.252	463.865	503.511	159.433	501.882	184.034	587.296	398.942	467.659	356.215	535.401	447.984	612.449
1448443_at	Serpini1	serine (or cysteine) peptidase inhibitor, clade I, member 1	3328.93	3260.32	2287.16	3230.56	2735.51	3281	2660.55	2944.01	1429.29	3054.5	1358.09	3211.63	2377.15	3102.57	2049.9	3135.26	2609.79	2762.37
1438782_at	Cntn4	contactin 4	116.804	139.528	98.3012	160.408	148.269	157.298	148.539	122.004	53.0341	164.417	75.2791	154.96	119.593	200.478	97.122	162.342	131.189	150.307
1433992_at	Shroom2	shroom family member 2	1521.52	1610.89	1263.16	1582.86	1426.45	1623.29	1278.65	1515.95	729.707	1507.71	726.355	1586.17	1375.87	1521.22	928.046	1769.96	1388.03	1498.4
1419249_at	Pftk1	PFTAIRE protein kinase 1	1197.78	1279.38	905.401	1314.65	1226.18	1408.04	1150.04	1177.01	462.849	1273.58	533.077	1316.56	1108.84	1267.77	807.627	1258.28	1108.89	1311.35
1452762_at	8430436O14Rik	RIKEN cDNA 8430436O14 gene	176.483	182.501	188.743	208.928	210.128	198.202	157.786	173.984	71.6138	176.647	71.5574	208.806	192.653	197.391	144.981	219.848	188.218	191.517
1436309_at	Neto2	neuropilin (NRP) and tolloid (TLL)-like 2	666.631	724.368	566.98	849.6	710.618	841.259	727.72	837.555	355.811	844.937	325.174	925.592	552.564	738.699	447.047	875.187	652.404	814.831
1426606_at	Crtac1	cartilage acidic protein 1	207.656	195.357	161.136	189.133	190.104	208.406	145.351	156.576	78.051	167.222	76.4361	189.565	156.103	157.4	147.713	200.311	218.622	189.456
1418271_at	Bhlhe22	basic helix-loop-helix family, member e22	451.194	395.294	350.028	445.087	586.18	528.433	582.204	452.459	185.145	516.176	179.386	572.828	399.275	660.35	325.869	439.483	451.306	486.117
1437744_at	Slitrk4	SLIT and NTRK-like family, member 4	963.157	1157.3	780.418	1163.59	1013.65	1086.32	1135.16	1004.9	405.266	1095.71	451.107	1105.68	965.273	1144.19	697.7	1234.96	802.046	975.523
1456307_s_at	Adcy7	adenylate cyclase 7	1165.1	1152.71	730.672	1071.3	1106.47	1167.84	1045.12	1004.35	326.225	1121.99	453.946	1177.95	1022.69	1128.86	685.208	1248.59	1061.13	1201.74
1435297_at	Gjd2	gap junction protein, delta 2	267.917	285.897	162.655	279.584	197.277	238.666	216.13	242.767	97.005	231.572	99.0315	223.42	231.652	309.646	201.542	299.06	236.613	237.285
1454768_at	Kcnf1	potassium voltage-gated channel, subfamily F, member 1	226.202	227.312	187.454	274.42	235.137	306.115	225.46	290.348	124.526	309.212	79.6072	287.532	208.742	330.839	245.65	347.522	234.017	311.929
1422638_s_at	Rassf5	Ras association (RalGDS/AF-6) domain family member 5	612.851	572.721	512.802	656.371	602.942	682.565	567.349	635.696	214.66	644.647	278.886	661.864	530.16	646.942	448.824	679.054	525.643	616.459
1424842_a_at	Arhgap24	Rho GTPase activating protein 24	324.832	325.157	237.887	342.224	297.133	283.326	253.311	260.684	107.423	289.781	128.592	310.229	256.139	313.373	322.562	294.357	268.606	250.516
1452624_at	Lrrtm1	leucine rich repeat transmembrane neuronal 1	413.045	534.349	372.494	453.868	405.856	453.675	419.178	332.216	218.07	359.085	183.611	461.592	364.275	437.533	204.919	481.366	318.821	367.199
1422052_at	Cdh8	cadherin 8	295.013	369.682	287.636	437.843	392.243	387.848	348.812	350.378	96.8023	326.53	91.9898	341.681	313.358	369.899	267.811	424.38	315.575	317.722
1457133_at	Tcerg1l	transcription elongation regulator 1-like	269.239	226.08	162.67	227.781	250.234	257.146	253.957	247.317	97.2757	228.326	95.3485	327.323	214.28	250.099	169.787	255.49	240.974	297.355
1449188_at	Midn	midnolin	351.583	334.896	352.067	335.279	309.887	283.547	250.535	792.498	371.964	639.687	274.11	246.103	337.303	745.429	338.182	453.035	345.884	321.873
1458813_at	Scn5a	sodium channel, voltage-gated, type V, alpha	148.421	144.733	103.379	142.517	164.367	176.53	147.304	142.539	49.9191	149.188	43.7154	195.362	136.168	150.553	114.29	155.707	148.893	168.779
1443847_x_at	Aff2	AF4/FMR2 family, member 2 (Aff2), mRNA	924.361	1046.66	864.593	940.128	1138.48	1070.43	926.648	935.846	462.621	980.099	451.947	1149.19	936.267	994.208	710.053	1023.73	940.94	1078.35
1452318_a_at	Hspa1b	heat shock protein 1B	229.434	409.515	364.61	533.581	369.517	561.373	1896.11	1813.74	952.372	1861.14	577.027	1423.43	482.204	1793.41	897.54	923.639	544.373	1599.28
1446771_at	Tuba8	tubulin, alpha 8	82.6949	79.4173	94.3704	88.8579	110.16	107.042	459.936	410.282	876.651	417.708	725.59	460.661	159.022	176.852	280.651	126.995	130.731	91.7001
1427127_x_at	Hspa1b	heat shock protein 1B	126.185	203.246	129.591	208.809	146.02	171.763	862.465	818.231	497.963	775.512	235.911	549.012	149.672	845.472	351.019	371.02	253.92	649.744
1442011_at	A230065H16Rik	RIKEN cDNA A230065H16 gene	121.927	126.904	183.029	114.611	94.9436	81.6067	86.6039	65.5227	45.3351	102.879	51.7459	106.061	64.7483	95.4133	42.0687	106.44	94.7037	90.3625
1450971_at	Gadd45b	growth arrest and DNA-damage-inducible 45 beta	84.7259	77.454	133.107	72.8374	84.5429	76.6278	108.135	522.449	141.584	261.211	180.917	102.88	101.653	249.964	80.3466	118.232	103.56	91.0638
1449773_s_at	Gadd45b	growth arrest and DNA-damage-inducible 45 beta	53.056	80.3604	96.1964	63.5046	70.3737	64.1635	100.294	512.603	136.661	244.491	156.062	91.5717	62.57	182.233	67.5563	69.8877	69.5299	72.0893
1440037_at	Pbx1	pre B-cell leukemia transcription factor 1	98.4888	179.737	76.5936	171.581	116.944	157.758	209.754	194.875	299.141	179.66	459.168	163.213	241.046	137.777	314.894	145.285	165.383	217.812
1447100_s_at	5730508B09Rik	RIKEN cDNA 5730508B09 gene	158.889	102.48	199.553	129.138	183.342	146.203	265.546	219.721	304.987	193.942	463.802	187.075	174.18	171.369	319.941	133.348	206.686	119.721
1442226_at	LOC100044162 /// Sema3e	hypothetical protein LOC100044162 /// sema domain, immunoglobulin domain (Ig), short basic domain, secreted, (semaphorin) 3E	333.66	212.465	309.565	223.083	391.973	332.172	383.671	334.98	536.09	418.089	527.663	720.928	200.258	183.94	430.295	164.414	302.713	263.152
1457806_at	B830028B13Rik	CDNA clone MGC:189985 IMAGE:9088172	198.746	210.488	79.0497	160.949	133.672	155.192	216.855	129.672	232.715	170.461	393.709	225.488	132.415	131.143	247.322	117.332	144.01	109.17
1417155_at	Mycn	v-myc myelocytomatosis viral related oncogene, neuroblastoma derived (avian)	86.1136	93.5818	117.407	95.4274	114.662	74.5162	230.358	183.965	442.973	186.882	360.797	181.048	99.4798	122.534	235.946	87.5206	135.427	83.5202
1449474_a_at	Nelf	nasal embryonic LHRH factor	346.531	271.356	270.115	211.403	249.243	198.247	423.645	355.876	935.961	363.197	974.654	323.89	453.06	385.201	602.317	257.395	364.699	322.204
1420760_s_at	Ndrg1	N-myc downstream regulated gene 1	2508.14	2214.51	2757.64	1939.21	2263.28	2006.82	3199.83	2974.24	7975.89	2656.13	5806.95	2491.89	2224.3	1968.06	3096.02	1896.44	2554.86	2272.36
1456333_a_at	Arhgap6	Rho GTPase activating protein 6	610.247	626.897	593.529	619.606	512.377	501.445	599.218	465.184	1646.74	531.48	999.219	478.161	704.757	503.823	661.867	583.739	499.343	618.205
1425983_x_at	Hipk2	homeodomain interacting protein kinase 2	155.467	193.3	285.187	111.681	210.632	139.377	163.663	183.23	296.46	176.316	258.326	212.853	165.646	140.535	223.742	140.666	164.489	180.443
1452682_at	Fam122b	family with sequence similarity 122, member B	977.45	804.553	930.903	650.342	722.157	647.243	1091.7	1078.58	2411.43	1152.24	2201.43	1079.11	1220.67	979.281	1651.67	800.226	1054.6	747.802
1437263_at	A730089K16Rik	RIKEN cDNA A730089K16 gene	135.813	98.895	152.23	105.918	132.883	117.609	221.354	138.915	301.36	140.005	309.664	160.344	158.245	112.993	173.021	105.82	145.44	96.9251
1445804_at	---	---	72.103	104.074	58.9451	83.4982	46.901	66.8362	144.859	99.3372	236.684	93.2173	181.307	54.0239	136.543	134.62	144.046	57.8011	132.407	96.386
1423450_a_at	Hs3st1	heparan sulfate (glucosamine) 3-O-sulfotransferase 1	292.999	268.301	348.236	290.22	306.532	283.251	451.912	320.607	852.28	222.058	684.736	452.535	292.076	211.682	270.808	183.872	231.693	203.707
1435119_at	---	---	108.219	174.656	158.853	172.315	121.489	186.896	104.316	136.774	54.7422	148.693	57.9919	87.1563	65.9415	90.7144	14.6723	81.1907	82.7625	69.4889
1449909_at	2010005H15Rik	RIKEN cDNA 2010005H15 gene	143.344	104.291	197.624	98.0444	201.03	135.799	192.347	174.254	363.25	197.562	199.231	169.146	120.889	111.751	161.84	65.5953	104.095	88.917
1416981_at	Foxo1	forkhead box O1	153.946	201.252	309.823	128.617	198.977	116.442	177.508	201.29	512.797	208.243	272.967	153.056	200.875	187.637	210.983	178.275	187.069	175.402
1442823_at	Shank2	SH3/ankyrin domain gene 2 (Shank2), transcript variant 2, mRNA	141.821	174.476	126.709	110.245	139.892	108.808	210.495	237.504	492.454	213.902	469.521	204.615	217.22	188.43	310.643	184.282	215.16	214.29
1422605_at	Ppp1r1a	protein phosphatase 1, regulatory (inhibitor) subunit 1A	1229.62	856.331	1559.58	869.559	1110.91	863.519	784.377	740.699	1422.11	552.485	1270.45	476.987	704.103	597.615	707.959	483.819	783.797	678.333
1426060_at	---	---	398.998	410.326	416.719	295.595	401.919	332.779	504.936	523.475	1022.74	445.159	1081.61	426.282	530.605	542.884	877.51	332.55	528.62	556.516
1440359_at	Fam110b	family with sequence similarity 110, member B	145.244	84.4288	112.101	82.4715	116.98	80.2597	111.986	96.7476	189.047	43.4645	221.553	89.6354	83.7255	66.3043	97.4393	66.9963	68.5413	62.7093
1460036_at	Ap1s2	adaptor-related protein complex 1, sigma 2 subunit	128.707	107.953	167.289	124.496	145.13	134.32	153.308	137.835	286.809	145.821	285.317	153.613	132.546	135.722	269.67	121.747	190.777	146.303
1426546_at	Tesk2	testis-specific kinase 2	222.768	179.319	233.697	197.367	211.419	238.016	236.469	224.92	562.973	253.22	478.568	278.978	265.015	180.58	307.285	132.016	257.416	185.676
1429286_at	1190003M12Rik	RIKEN cDNA 1190003M12 gene	65.4196	74.987	104.589	61.1307	102.973	93.0407	204.332	224.184	204.682	117.027	252.709	84.4798	54.4177	61.5341	88.673	53.9402	87.92	32.9594
1419457_at	Rgnef	Rho-guanine nucleotide exchange factor	137.306	136.74	148.614	104.285	123.226	94.7028	149.483	146.961	328.207	120.15	265.024	95.746	132.657	123.552	189.549	98.0574	151.603	109.066
1435092_at	Arl4a	ADP-ribosylation factor-like 4A	1265.97	998.612	1517.45	1207.64	1561.21	1482.12	2057.72	1425.53	3259.82	1491.85	3268.45	2027.11	1604.6	1140.74	1789.2	1066.37	1400.39	1107.1
1431300_at	Sgip1	SH3-domain GRB2-like (endophilin) interacting protein 1	64.7	97.9731	66.9848	112.641	70.2521	90.9329	152.794	146.542	282.495	139.129	291.78	84.6752	175.955	155.133	210.99	104.541	195.331	112.915
1435283_s_at	Gm967	gene model 967, (NCBI)	297.213	265.612	342.521	242.332	281.193	248.189	298.442	278.409	694.258	228.916	496.118	254.365	318.522	212.135	385.327	180.8	334.144	227.997
1424415_s_at	Spon1	spondin 1, (f-spondin) extracellular matrix protein	1208.8	915.657	1193.58	761.896	1033.18	668.495	828.722	789.743	1844.3	701.947	1687.01	715.674	998.935	852.075	1219.69	728.097	1047.32	750.496
1452514_a_at	Kit	kit oncogene	707.435	651.959	842.394	730.804	829.917	684.664	847.613	795.914	1878.68	648.554	1426.86	675.631	800.707	686.143	816.546	637.789	817.134	778.219
1416008_at	Satb1	special AT-rich sequence binding protein 1	639.876	662.888	836.986	587.149	661.591	644.012	962.175	826.661	1514.27	711.366	1577.27	748.938	864.508	836.18	1125.87	653.191	835.434	653.005
1427523_at	E130112M24Rik /// Six3	RIKEN cDNA E130112M24 gene /// sine oculis-related homeobox 3 homolog (Drosophila)	4689.42	4372.39	5479.71	3263.16	4100.9	3393.18	3265.54	3815.68	8895.26	3357.29	7332.72	3169.44	4232.5	3658.57	5167.64	3455.14	4395.96	4393.91
1427157_at	Ccdc85a	coiled-coil domain containing 85A	319.324	343.146	225.549	479.134	345.025	460.008	765.247	675.112	252.293	486.144	268.601	457.669	336.151	640.903	287.144	445.513	330.626	318.851
1428891_at	9130213B05Rik	RIKEN cDNA 9130213B05 gene	1692.82	1457.82	1843.55	1292.94	1523.63	1303.19	1688.12	1800.95	4178.72	1547.31	3687.15	1494.85	1885.97	1531.01	2637.7	1436.15	1958.8	1608.14
1451021_a_at	Klf5	Kruppel-like factor 5	457.946	382.789	695.769	288.07	508.248	321.143	228.564	361.274	771.306	393.684	473.164	275.653	446.637	321.192	377.361	322.053	395.673	389.916
1421137_a_at	Pkib	protein kinase inhibitor beta, cAMP dependent, testis specific	1242.67	934.785	1405.16	1036.34	1335.07	1263.3	2816.83	2177.71	3662.83	2153.55	4256.45	1697.87	2085.67	2086.15	2669.71	1627.73	1779.55	1303.47
1434572_at	Hdac9	histone deacetylase 9	794.581	724.363	1058.07	846.054	913.957	860.238	1487.86	1373.81	1951.67	1016.46	1862.39	745.805	1131.48	1318.77	1588.31	997.162	1118.74	654.397
1445576_at	Rsph10b2	radial spoke head 10 homolog B (Chlamydomonas)	172.925	161.743	198.683	134.623	161.422	178.374	162.039	144.32	288.422	173.581	406.126	183.688	278.497	154.352	352.241	175.565	255.953	201.265
1416250_at	Btg2	B-cell translocation gene 2, anti-proliferative	317.196	447.415	246.085	255.28	278.505	263.007	300.169	2347.98	228.362	340.127	306.356	259.619	325.807	716.157	428.732	335.565	354.665	349.004
1435972_at	Cast	calpastatin	205.493	188.164	311.153	198.628	243.478	205.745	222.854	188.423	405.975	188.389	407.98	219.742	209.933	178.814	265.834	144.725	199.19	177.253
1443322_at	---	---	209.051	187.156	211.929	149.187	208.319	132.471	187.519	162.19	342.981	204.577	336.899	176.254	197.123	188.224	334.846	161.957	254.403	144.91
1429786_a_at	Zwint	ZW10 interactor	6949.54	6359.28	2811.66	5764.56	3447.44	6636.5	6195.63	5735.06	2347.86	5196.49	4488.32	4882.28	3603.66	4272.02	3324.79	5108.21	3440.25	3922.29
1455933_at	---	---	119.86	177.707	78.2366	224.317	103.898	198.955	229.437	258.101	118.143	194.495	147.348	116.219	181.648	175.351	124.404	177.451	120.033	148.066
1431465_s_at	Fyttd1	forty-two-three domain containing 1	279.116	253.432	96.1043	324.927	146.029	245.042	223.263	195.8	125.049	206.236	134.069	188.533	188.751	217.274	132.621	268.285	116.842	240.53
1435285_at	Mpped2	metallophosphoesterase domain containing 2	205.192	192.9	308.595	188.919	203.453	163.319	226.534	210.275	414.488	189.915	406.605	193.081	241.977	205.951	298.444	186.792	239.17	170.601
1440534_at	ENSMUSG00000056615	predicted gene, ENSMUSG00000056615	79.1444	157.977	131.9	165.284	131.922	141.009	89.8995	94.1093	69.1495	101.112	33.04	101.305	94.9175	359.335	240.208	197.807	141.221	114.751
1434295_at	Rasgrp1	RAS guanyl releasing protein 1	1346.11	1184.52	1391.16	995.133	1248.18	1047.72	1698.17	1656.66	2586.92	1249.26	2286.41	1080.45	1684.77	1623.26	2752.65	1251.42	1847.04	974.818
1434785_at	Cacng5	calcium channel, voltage-dependent, gamma subunit 5	949.699	770.451	785.836	764.383	843.771	808.127	789.52	727.956	1440.68	848.704	1704.77	1062.96	927.574	714.457	1543.78	684.262	1053.68	770.574
1430177_at	Ube2b	ubiquitin-conjugating enzyme E2B, RAD6 homology (S. cerevisiae)	143.171	201.335	72.1394	110.029	74.5696	138.919	166.712	215.762	156.441	179.594	105.519	74.2749	128.283	221.191	134.801	141.996	97.1784	89.1754
1416301_a_at	Ebf1	early B-cell factor 1	161.886	90.5014	67.9718	80.7522	129.695	132.992	91.1565	120.326	35.0937	100.105	54.901	95.9792	99.7574	149.314	70.2004	127.03	137.816	120.693
1435854_at	Opalin	oligodendrocytic myelin paranodal and inner loop protein	794.562	927.955	954.754	814.723	673.279	653.733	333.055	347.081	150.977	313.103	246.26	412.82	562.955	464.457	92.9389	545.586	563.995	515.636
1432813_at	2900064F13Rik	RIKEN cDNA 2900064F13 gene	263.785	333.543	388.856	349.572	395.87	424.797	279.396	316.539	140.025	338.069	166.992	399.283	284.696	343.639	273.226	372.277	328.169	376.267
1455960_at	Megf9	multiple EGF-like-domains 9	304.007	469.305	193.438	428.906	207.162	329.645	330.36	274.192	94.1178	292.217	183.294	253.099	310.695	328.829	167.911	358.488	133.179	316.469
1432432_a_at	LOC100044883 /// Rab3c	similar to RAB3C, member RAS oncogene family /// RAB3C, member RAS oncogene family	1053.09	1336.06	742.652	1255.73	1065.54	1031.4	1241.96	1136.42	470.198	1079.98	508.069	1118.66	1028.05	1054.87	526.04	1248.61	613.648	1243.15
1420161_at	AA409749	expressed sequence AA409749	96.5362	105.767	82.3094	137.822	127.742	140.825	94.2461	94.5627	65.7976	163.239	54.6374	142.567	96.9887	119.867	64.9879	129.488	115.948	112.049
1450930_at	Hpca	hippocalcin	625.918	611.097	373.669	635.089	438.497	570.729	418.749	474.427	506.032	432.095	166.145	379.095	424.21	623.433	294.614	721.117	385.979	483.383
1416701_at	Rnd3	Rho family GTPase 3	152.766	185.882	85.2225	144.731	118.299	172.017	136.352	159.291	50.2621	241.64	88.5622	186.665	138.321	193.704	114.027	182.181	105.145	129.595
1439278_at	Zbtb20	zinc finger and BTB domain containing 20	128.343	165.467	284.896	95.4847	189.475	83.7862	117.374	129.632	236.778	109.209	289.147	144.932	187.715	103.014	283.97	120.257	203.416	168.048
1420876_a_at	40062	septin 6	140.765	141.978	67.3876	165.943	80.4065	164.835	126.198	143.767	106.938	136.132	116.535	125.5	119.749	128.62	77.9712	126.838	77.5224	89.6481
1425296_a_at	Rgs3	regulator of G-protein signaling 3	250.955	239.317	246.52	217.816	241.628	234.436	292.331	198.146	413.138	152.131	426.422	302.96	283.975	167.513	225.404	219.785	258.971	257.723
1426960_a_at	Fa2h	fatty acid 2-hydroxylase	346.588	490.627	675.403	508.514	483.812	415.536	275.623	289.796	208.335	342.211	210.739	420.921	395.83	401.366	162.187	430.126	332.294	423.668
1434347_s_at	---	---	451.606	455.428	372.722	497.877	438.399	520.977	346.633	289.167	106.381	276.218	128.551	334.913	392.031	406.522	217.308	357.923	250.011	340.659
1438007_at	Fam19a2	family with sequence similarity 19, member A2	1022.7	744.749	726.493	862.036	925.937	1007.22	779.97	593.059	279.485	772.975	316.019	871.735	706.778	805.818	597.814	859.823	910.514	773.826
1456509_at	1110032F04Rik	RIKEN cDNA 1110032F04 gene	128.829	115.943	119.944	130.755	187.408	183.243	166.296	118.574	60.6976	145.404	53.3382	165.741	120.405	159.093	99.7816	129.308	128.786	129.831
1418901_at	Cebpb	CCAAT/enhancer binding protein (C/EBP), beta	549.916	685.956	578.093	509.673	582.559	485.923	467.13	1243.53	379.114	623.577	350.284	510.667	536.838	1259.37	545.135	635.521	639.157	599.49
1444025_at	Kcnj3	potassium inwardly-rectifying channel, subfamily J, member 3	145.531	228.258	140.859	174.681	158.556	149.229	170.652	138.352	65.0337	129.871	54.777	154.028	116.5	179.194	91.1989	153.439	126.893	97.7709
1455267_at	Esrrg	estrogen-related receptor gamma	457.359	437.516	318.849	499.191	409.088	529.485	376.467	384.345	172.671	402.775	212.47	452.454	313.492	406.603	208.159	438.129	314.171	371.267
1429783_at	Pdlim5	PDZ and LIM domain 5	109.423	150.474	119.261	150.19	150.12	155.608	114.811	126.004	47.7868	171.871	62.6576	148.048	178.281	139.849	94.9906	200.559	150.359	146.758
1452160_at	Tiparp	TCDD-inducible poly(ADP-ribose) polymerase	181.342	335.299	226.371	248.869	278.797	206.571	245.359	1027.26	140.959	365.535	197.227	217.56	223.979	514.628	213.13	257.768	186.389	175.16
1426721_s_at	Tiparp	TCDD-inducible poly(ADP-ribose) polymerase	230.322	339.751	249.61	241.092	317.948	226.121	250.51	1048.69	187.38	326.947	209.011	198.728	232.001	540.226	281.279	271.774	233.194	172.994
1429772_at	Plxna2	plexin A2	130.142	137.371	89.3871	173.46	118.918	159.771	135.92	145.383	34.4442	127.972	19.8755	92.5157	139.772	182.221	82.2135	171.699	112.559	148.559
1448694_at	Jun	Jun oncogene	582.12	709.496	756.583	603.913	749.751	592.995	521.564	1966.67	503.16	1359.41	537.563	585.267	629.584	1079.06	598.6	760.378	771.018	697.171
1426875_s_at	Srxn1	sulfiredoxin 1 homolog (S. cerevisiae)	1242.97	962.811	935.003	1090.22	1017.26	1052.6	909.151	1666.4	908.596	3198.79	819.79	2484.24	950.703	1528.41	947.806	1713	956.136	1813.89
1441890_x_at	LOC100045217 /// Tmeff1	similar to Transmembrane protein with EGF-like and two follistatin-like domains 1 /// transmembrane protein with EGF-like and two follistatin-like domains 1	90.9892	119.113	138.419	129.619	135.931	134.439	147.545	131.536	55.783	135.314	65.7981	122.802	108.771	183.724	74.4548	117.1	109.446	114.495
1455421_x_at	Fam131b	family with sequence similarity 131, member B	167.039	158.596	131.584	206.28	137.064	199.37	188.429	152.575	177.91	200.495	90.8677	205.382	133.257	219.15	93.2637	189.895	155.63	135.854
1433489_s_at	Fgfr2	fibroblast growth factor receptor 2	219.661	290.531	229.987	295.187	161.072	219.517	188.425	223.934	129.8	321.507	137.192	280.564	190.387	246.21	159.021	244.595	210.985	242.981
1434246_at	L3mbtl3	l(3)mbt-like 3 (Drosophila)	209.119	168.508	99.7551	202.736	119.791	182.244	246.355	224.875	208.171	223.785	154.923	236.282	159.135	170.722	154.784	202.276	132.888	196.181
1454109_a_at	Jmjd6	jumonji domain containing 6	184.023	175.51	137.123	175.762	112.095	141.749	176.529	184.196	111.811	179.837	123.285	140.346	138.841	244.771	117.315	188.037	118.096	111.103
1419518_at	Tuba8	tubulin, alpha 8	79.8901	55.0299	69.6702	42.4699	79.2609	67.5207	144.733	127.39	303.291	142.045	272.774	168.695	82.3329	61.4682	80.5444	54.0909	62.6208	46.6347
1416756_at	Dnajb1	DnaJ (Hsp40) homolog, subfamily B, member 1	402.231	418.421	295.301	442.612	292.884	389.243	698.559	1498.81	350.343	663.124	615.211	428.318	327.396	667.402	377.097	467.104	319.468	324.611
1425175_at	C1ql3	C1q-like 3	1322.62	883.801	1415.65	1060.54	1268.59	1089.78	571.514	651.733	1257.07	840.826	1047.67	762.935	375.515	493.323	1265.44	572.347	825.05	799.503
1460101_at	---	---	148.571	181.167	111.599	156.229	133.522	156.301	200.625	212.297	528.851	168.321	546.034	103.299	337.883	209.136	356.627	112.545	259.849	209.218
1455872_at	Fam167a	family with sequence similarity 167, member A	128.808	150.717	163.129	101.757	138.899	100.795	80.5228	123.358	86.8627	207.669	97.3938	119.803	142.532	175.615	187.846	148.002	149.912	132.932
1452887_at	Traf3ip1	TNF receptor-associated factor 3 interacting protein 1	213.224	202.599	173.876	217.265	223.408	224.129	158.232	251.184	157.001	412.174	142.871	285.045	178.059	229.967	243.007	307.028	215.374	262.035
1449037_at	Crem	cAMP responsive element modulator	167.895	164.935	167.563	195.366	147.989	145.155	125.612	200	141.157	278.977	141.176	271.738	142.988	327.805	179.393	274.313	195.449	279.616
1445537_at	---	---	105.001	106.553	70.4487	98.8866	86.2856	96.1597	114.188	106.815	237.893	96.0252	307.302	103.412	148.809	107.965	209.131	86.8479	137.388	122.056
1457212_at	---	---	60.9351	101.345	68.2774	82.1812	82.04	81.3229	121.125	95.95	268.679	96.9986	281.706	101.874	176.003	114.19	198.899	92.0935	131.733	158.634
1450945_at	Prkca	protein kinase C, alpha	95.0107	72.6312	84.4978	85.0255	97.9721	85.9925	136.876	115.837	205.865	135.227	191.22	109.472	85.9874	114.709	166.542	86.4716	85.5497	67.3776
1421138_a_at	Pkib	protein kinase inhibitor beta, cAMP dependent, testis specific	670.536	498.799	510.413	563.032	494.756	626.081	1329.32	1235.8	2511.3	923.241	2268.21	762.018	970.733	862.351	1286.25	748.627	822.242	660.23
1442368_at	Kctd12b	potassium channel tetramerisation domain containing 12b	151.183	140.19	203.735	153.448	146.762	107.853	106.713	121.385	225.759	97.968	303.329	114.852	134.072	143.705	177.696	114.606	98.4091	124.528
1424607_a_at	100039204 /// 100040620 /// 100040790 /// 100041416 /// 100042151 /// 100043211 /// 100043316 /// Cwc22 /// LOC100047648 /// OTTMUSG00000017752	predicted gene, 100039204 /// predicted gene, 100040620 /// predicted gene, 100040790 /// predicted gene, 100041416 /// predicted gene, 100042151 /// predicted gene, 100043211 /// predicted gene, 100043316 /// CWC22 spliceosome-associated protein homolog	941.854	1183.73	966.655	902.322	1057.51	849.744	1228.2	1250.08	3517.59	1172.38	2262.85	1046.56	1623.55	1240.91	2083.01	993.83	1395.66	1651.03
1452287_at	---	---	306.576	270.89	371.154	282.415	362.831	291.379	375.445	327.332	1143.2	415.745	664.885	389.912	394.545	348.636	461.198	334.366	384.147	318.835
1423413_at	Ndrg1	N-myc downstream regulated gene 1	963.021	916.944	1284.97	837.794	976.622	844.806	1287.86	1118.98	2878.52	916.75	1851.28	980.538	974.037	756.678	841.134	793.456	678.419	658.399
1419717_at	LOC100044162 /// Sema3e	hypothetical protein LOC100044162 /// sema domain, immunoglobulin domain (Ig), short basic domain, secreted, (semaphorin) 3E	258.146	208.206	292.857	250.351	382.879	313.728	322.732	299.616	419.87	397.691	383.514	858.752	195.9	184.25	335.043	167.544	233.481	263.496
1423271_at	Gjb2	gap junction protein, beta 2	108.524	121.084	152.356	161.343	126.153	127.657	86.7707	108.506	78.7153	160.031	86.7056	177.156	78.3152	121.9	55.7759	124.769	75.4634	139.114
1424609_a_at	100039204 /// 100040620 /// 100040790 /// 100041416 /// 100042151 /// 100043211 /// 100043316 /// Cwc22 /// LOC100046838 /// LOC100047648 /// OTTMUSG00000017752	predicted gene, 100039204 /// predicted gene, 100040620 /// predicted gene, 100040790 /// predicted gene, 100041416 /// predicted gene, 100042151 /// predicted gene, 100043211 /// predicted gene, 100043316 /// CWC22 spliceosome-associated protein homolog	896.628	1035.32	895.856	775.833	895.024	772.271	1149.66	1211.34	2932.74	1020.46	2036.89	1008.26	1454.26	1070	1936.92	894.602	1330.92	1521.62
1424608_a_at	100039204 /// 100039345 /// 100040790 /// 100041175 /// 100041416 /// 100042151 /// 100042787 /// 100043211 /// 100043258 /// 100043316 /// 434166 /// Bzw2 /// OTTMUSG00000017752	predicted gene, 100039204 /// predicted gene, 100039345 /// predicted gene, 100040790 /// predicted gene, 100041175 /// predicted gene, 100041416 /// predicted gene, 100042151 /// predicted gene, 100042787 /// predicted gene, 100043211 /// predicted gene,	93.3611	117.607	93.5908	72.2799	95.5388	63.7389	94.2172	122.684	262.707	89.5975	202.396	89.0814	126.146	103.241	177.244	77.7314	112.97	99.2688
1436566_at	Rab40b	Rab40b, member RAS oncogene family	584.586	584.083	774.455	685.422	821.582	726.524	1218.95	837.96	1771.01	716.026	1568.1	847.814	827.782	755.724	985.645	604.795	707.957	583.514
1429506_at	Nkd1	naked cuticle 1 homolog (Drosophila)	94.1123	92.6375	60.815	88.3113	62.9998	70.4138	103.337	137.579	203.29	104.906	191.051	78.9673	148.51	114.013	163.998	116.991	116.49	104.216
1435192_at	Sox3	SRY-box containing gene 3	492.869	301.411	582.207	306.508	508.631	312.386	455.944	393.468	1419.67	593.71	903.157	581.046	419.125	503.685	639.869	447.945	570.206	572.799
1451440_at	Chodl	chondrolectin	1519.91	1013.02	1645.75	1037.12	932.322	752.075	897.936	825.652	1504.52	734.439	1355.5	892.278	1293.03	990.44	1634.42	1038.9	1498.86	1339.94
1419358_at	Sorcs2	sortilin-related VPS10 domain containing receptor 2	470.377	417.241	425.72	336.097	404.463	339.638	520.692	511.211	1133.57	459.329	806.228	392.98	514.602	451.234	532.997	349.407	492.544	389.569
1449740_s_at	Dsg2	desmoglein 2	225.267	228.591	332.729	243.999	295.409	258.992	295.837	194.665	414.336	271.442	546.436	342.723	307.372	204.641	404.024	275.069	295.847	252.186
1417757_at	Unc13b	unc-13 homolog B (C. elegans)	174.685	158.756	147.735	149.508	155.34	144.452	201.347	235.95	438.498	189.529	450.933	180.577	208.036	202.975	299.025	177.165	201.556	178.714
1452462_a_at	Banp	BTG3 associated nuclear protein	86.1996	106.723	80.2721	117.099	103.46	68.4541	169.391	136.377	286.081	126.977	202.787	116.053	128.023	178.122	198.245	122.932	114.728	74.1472
1420649_at	Zfhx3	zinc finger homeobox 3	2081.5	2534.05	2992.01	1397	2608.69	1514.12	2350.5	2438.96	3520.31	2137.79	4607.71	2424.06	2628.16	1956.43	3454.29	1907.74	2387.74	2684.69
1443175_at	A830010M09Rik	RIKEN cDNA A830010M09 gene	80.6197	150.285	76.371	143.157	96.6032	144.592	221.011	198.478	189.266	153.407	357.564	111.993	190.174	148.823	242.339	95.5643	192.768	179.921
1431146_a_at	Cpne8	copine VIII	107.922	115.373	104.517	111.158	122.998	126.697	178.886	166.833	377.387	159.139	292.475	165.701	199.588	134.286	186.202	115.638	152.448	87.453
1435551_at	Fhod3	formin homology 2 domain containing 3	1035.72	928.559	1123.95	876.501	1108.91	984.346	1121.75	1052.37	1995.5	1013.82	1707.43	824.328	823.161	792.486	1329.03	827.52	929.635	828.389
1451469_at	Cntln	centlein, centrosomal protein	146.271	130.64	106.809	110.472	92.8971	105.375	117.941	121.601	290.041	120.039	242.997	97.7861	130.965	108.879	187.181	117.552	126.938	93.1996
1426858_at	Inhbb /// LOC100046802	inhibin beta-B /// similar to Inhbb protein	142.834	153.997	134.344	148.05	166.153	120.637	195.275	162.451	382.274	175.625	259.087	176.828	179.2	223.214	286.176	132.508	179.876	127.622
1419389_at	Pde10a	phosphodiesterase 10A	303.811	437.262	269.048	328.758	333.468	402.998	249.562	238.858	311.976	264.043	140.657	416.316	224.952	220.989	269.114	408.072	239.965	552.89
1439161_at	Saps3	SAPS domain family, member 3	79.8675	155.204	80.6351	111.113	74.4057	100.177	129.036	166.679	220.286	138.351	241.838	88.3483	157.043	135.158	158.69	101.346	130.939	130.433
1424863_a_at	Hipk2	homeodomain interacting protein kinase 2	315.113	392.196	581.117	227.387	420.494	254.785	330.13	334.879	512.301	338.236	499.13	440.875	331.919	267.307	470.863	263.838	304.998	347.288
1426834_s_at	D930015E06Rik	RIKEN cDNA D930015E06 gene	87.9186	87.0277	56.4739	111.085	94.6313	101.307	131.336	140.261	239.191	111.809	166.872	140.683	145.084	125.49	182.165	98.0047	114.098	79.2845
1428948_at	5730414M22Rik	RIKEN cDNA 5730414M22 gene	77.2251	88.0419	76.6576	55.5008	68.1237	92.1938	162.834	187.956	251.766	155.981	231.07	146.335	92.6713	133.191	148.242	104.048	117.76	72.8012
1428646_at	LOC676870 /// Pbx1	region containing RIKEN cDNA 2310056B04 gene; pre B-cell leukemia transcription factor 1 /// pre B-cell leukemia transcription factor 1	657.208	609.702	620.314	557.861	609.051	588.859	725.128	746.384	1519.79	661.74	1436.93	580.592	775.261	641.48	900.539	581.168	626.961	579.478
1445579_at	---	---	231.97	191.011	157.102	147.03	91.6016	132.784	109.344	69.3723	279.665	67.8872	208.343	85.756	135.7	91.6836	123.991	88.276	140.659	139.94
1452714_at	Tanc1	tetratricopeptide repeat, ankyrin repeat and coiled-coil containing 1	230.099	230.841	243.79	196.995	231.181	202.605	378.737	321.927	487.316	258.191	534.762	209.491	310.491	289.672	367.078	220.514	232.728	188.014
1440557_at	Ipw	Ipw mRNA, partial sequence	497.577	405.999	399.98	419.51	412.791	426.368	613.982	623.357	935.319	600.026	1136.31	514.419	657.215	500.687	986.554	458.992	703.243	526.106
1453807_at	6330563C09Rik	RIKEN cDNA 6330563C09 gene	199.379	164.655	225.083	146.459	255.706	179.674	109.009	130.251	184.769	139.37	290.508	151.123	161.687	122.484	251.987	144.225	198.414	209.439
1438698_at	Tmem132c	transmembrane protein 132C	256.385	251.375	227.236	162.933	203.721	239.081	211.919	230.608	368.888	209.009	387.758	176.297	258.206	201.723	311.853	200.072	217.466	187.723
1432189_a_at	Sox5	SRY-box containing gene 5	142.746	158.203	177.314	94.2288	142.46	106.256	95.5435	102.931	233.894	83.7893	163.039	73.0454	128.895	102.072	102.113	83.8694	85.791	94.6862
1460092_at	---	---	102.614	153.285	87.5881	187.593	125.987	162.439	208.245	175.812	280.284	140.787	414.601	145.135	280.934	192.966	291.575	111.389	235.885	163.925
1452968_at	Cthrc1	collagen triple helix repeat containing 1	543.717	488.292	554.024	496.314	573.667	516.967	607.917	642.401	1148.53	555.288	1005.14	456.408	536.637	585.996	697.971	541.974	660.866	511.693
1429900_at	5330406M23Rik	RIKEN cDNA 5330406M23 gene	130.23	222.987	98.8198	130.917	80.3403	111.322	137.679	238.961	258.135	150.676	296.182	71.5583	238.76	249.923	281.853	126.127	206.481	165.255
1423530_at	Stk32c	serine/threonine kinase 32C	380.895	342.185	525.193	337.014	545.958	358.907	428.829	446.916	793.855	410.478	697.209	509.976	435.698	373.732	589.865	361.649	406.967	292.012
1447342_at	---	---	77.1166	91.2734	88.0639	80.1163	67.8034	88.2826	117.219	77.8232	143.084	88.0518	151.605	81.7833	141.895	86.7617	194.972	72.4138	136.085	77.1048
1436023_at	Bclaf1	BCL2-associated transcription factor 1	961.726	751.326	375.387	775.718	459.805	808.377	670.176	739.137	275.605	706.05	373.425	512.48	725.308	667.2	367.729	681.69	368.054	811.646
1434064_at	Orai3	ORAI calcium release-activated calcium modulator 3	94.0607	84.7581	112.362	90.4528	99.6277	76.9465	112.536	96.4813	218.653	70.2871	141.793	89.3373	98.1041	88.7759	111.708	77.0843	105.586	74.3128
1416442_at	Ier2	immediate early response 2	133.606	116.38	152.684	119.057	127.57	117.754	107.129	547.625	155.395	133.815	155.689	126.134	117.851	163.669	135.519	94.3045	131.755	128.192
1437150_at	Fam110b	family with sequence similarity 110, member B	502.978	362.472	478.57	413.101	409.382	402.36	501.28	380.701	915.722	267.423	626.628	393.528	420.544	310.301	353.123	294.547	391.275	272.764
1424062_at	Ube2d1	ubiquitin-conjugating enzyme E2D 1, UBC4/5 homolog (yeast)	504.409	534.853	645.691	552.26	602.425	542.563	687.243	575.177	1327.19	422.649	938.422	574.499	610.636	494.64	575.994	408.935	578.002	435.404
1448830_at	Dusp1	dual specificity phosphatase 1	929.488	1001.31	1014.81	664.236	762.968	650.824	401.033	2475.22	530.993	724.096	521.1	518.451	933.894	1695.03	1450.99	1064.18	1184.69	1221.8
1449542_at	Pbx1	pre B-cell leukemia transcription factor 1	108.791	95.1332	106.16	97.0743	109.321	80.8503	144.498	154.452	269.529	161.203	231.993	119.164	118.528	157.368	176.884	99.5388	114.779	58.9827
1435730_at	D930026N18Rik	RIKEN cDNA D930026N18 gene	96.0661	110.795	115.096	73.0622	97.7432	75.29	143.851	134.507	254.523	112.359	212.481	94.1262	134.655	112.775	166.748	114.779	130.18	115.084
1442561_at	---	---	117.47	209.077	134.48	227.998	137.988	218.683	249.765	223.058	365.501	196.891	393.839	160.321	335.157	205.011	330.292	166.643	281.157	221.506
1440966_at	39879	membrane-associated ring finger (C3HC4) 7	275.007	428.686	262.56	333.545	249.538	354.478	404.778	366.468	237.869	510.609	564.415	168.293	343.709	280.998	380.117	307.342	245.686	288.887
1456512_at	Pdzrn4	PDZ domain containing RING finger 4	186.512	155.647	186.441	205.481	206.817	212.377	304.139	273.067	281.837	256.736	251.658	116.966	234.13	239.455	333.177	211.258	244.491	153.396
1426719_at	Apbb2	amyloid beta (A4) precursor protein-binding, family B, member 2	1085.05	994.889	1121.42	845.385	1018.23	868.511	1148.68	1316.6	2367	1032.52	2158.65	1210.29	1272.12	993.948	1600.82	1005.68	1247.05	1003.21
1428647_at	LOC676870 /// Pbx1	region containing RIKEN cDNA 2310056B04 gene; pre B-cell leukemia transcription factor 1 /// pre B-cell leukemia transcription factor 1	4934.12	4677.89	4758.82	3869.64	4495.42	4157.81	5081.87	5468.03	9787.24	4635.5	9352.71	4705.93	5690.28	4933.18	7520.88	4324.58	5261.18	4767.59
1447927_at	EG634650 /// Gbp10 /// Mpa2l	predicted gene, EG634650 /// guanylate-binding protein 10 /// macrophage activation 2 like	116.327	75.1158	123.719	103.903	98.622	96.9826	108.646	91.9559	208.521	84.8604	248.416	87.3406	140.024	101.245	177.256	82.7145	135.604	90.5802
1442029_at	Kcnq1ot1	KCNQ1 overlapping transcript 1	159.924	217.536	144.212	230.337	170.681	245.791	369.944	251.934	360.199	200.496	310.339	183.669	326.852	280.905	291.564	150.161	248.191	247.701
1422673_at	Prkd1	protein kinase D1	840.9	653.369	797.399	654.64	836.189	736.488	813.568	741.076	1357.1	790.015	1580.55	1131.23	669.62	651.691	1207.36	567.071	872.142	945.593
1433589_at	D6Wsu116e	DNA segment, Chr 6, Wayne State University 116, expressed	188.273	222.167	109.296	213.413	100.277	155.525	181.696	133.621	49.0647	150.407	100.884	118.388	161.225	135.156	85.3479	143.201	85.9877	161.399
1437047_at	Zfp664	zinc finger protein 664	226.471	196.872	116.395	218.315	117.97	148.583	190.643	173.24	115.506	178.229	87.8834	129.556	186.179	187.835	76.8453	161.942	115.619	136.266
1457781_at	Kcnq1ot1	KCNQ1 overlapping transcript 1	125.037	176.254	95.5401	103.804	118.622	90.6232	152.154	151.065	273.318	120.407	257.31	96.3987	209.865	155.222	222.973	104.997	216.247	199.619
1431751_a_at	Mpped2	metallophosphoesterase domain containing 2	336.879	300.844	427.996	250.727	317.882	210.193	308.163	273.74	644.964	251.888	485.057	231.581	340.725	268.08	346.895	239.487	333.683	239.548
1426543_x_at	Endod1	endonuclease domain containing 1	470.906	451.509	232.145	468.741	295.084	436.869	352.206	356.52	156.565	279.545	174.462	321.235	355.754	390.063	214.945	310.483	176.934	320.143
1436985_at	Zfp644	zinc finger protein 644	496.257	444.81	285.035	410.496	329.974	447.11	297.678	405.176	106.56	316.201	178.831	210.554	353.14	340.501	168.15	330.515	196.455	414.802
1452388_at	Hspa1a	heat shock protein 1A	134.504	157.635	211.885	211.983	169.038	190.847	373.093	335.904	195.867	370.894	176.587	362.816	180.82	372.72	217.233	245.701	173.899	323.593
1458176_at	Per3	Period homolog 3 (Drosophila) (Per3), mRNA	189.291	175.669	120.798	129.417	93.4893	99.6655	82.1609	79.1839	104.878	46.021	100.332	58.394	97.775	56.9021	114.98	53.9608	107.041	98.6277
1423652_at	Isca1	iron-sulfur cluster assembly 1 homolog (S. cerevisiae)	682.809	604.299	259.597	710.133	334.645	589.618	546.475	607.278	96.9782	546.558	388.336	511.47	447.267	509.793	357.73	670.172	316.619	484.568
1444746_at	---	---	231.272	262.789	247.583	279.954	210.574	294.662	275.244	234.761	398.804	270.242	481.312	271.441	396.707	214.312	499.903	252.221	346.01	337.745
1449109_at	Socs2	suppressor of cytokine signaling 2	142.173	130.383	166.561	132.529	171.767	123.347	162.241	157.452	225.163	168.38	182.035	104.376	151.773	173.945	198.752	83.712	168.962	179.776
1426541_a_at	Endod1	endonuclease domain containing 1	1840.45	2135.6	1009.53	2132.9	1220.08	1755.05	1618.48	1397.83	642.192	1241.12	790.347	1174.07	1378.74	1615.6	772.264	1446.26	750.201	1229.57
1447623_s_at	Prkd1	protein kinase D1	2641.89	2407.73	2596.97	2136.72	2604.62	2299.67	2967	2455.75	3286.38	2443.24	4427.86	3516.96	2305.44	2202.01	3609.58	1697.71	2787.22	2539.64
1423853_at	6330527O06Rik	RIKEN cDNA 6330527O06 gene	89.3041	119.831	150.079	176.361	125.547	111.734	93.2506	128.701	127.371	118.025	33.7009	104.757	117.608	389.338	150.184	204.498	112.399	112.164
1441989_at	Bnip2	BCL2/adenovirus E1B interacting protein 2	126.048	83.5327	156.542	98.2523	110.032	118.804	83.481	103.481	146.962	102.156	177.819	99.4374	108.769	68.7791	160.239	85.977	131.729	94.9754
1458129_at	Rora	RAR-related orphan receptor alpha	643.721	634.646	504.534	596.368	536.919	458.722	308.928	330.123	164.816	852.966	335.377	575.139	372.305	320.695	352.164	572.445	367.824	707.741
1450850_at	Ezr /// LOC100044177	ezrin /// hypothetical protein LOC100044177	585.621	612.658	664.449	610.388	680.273	653.85	552.648	981.481	623.13	1231.37	571.957	897.57	615.933	859.588	996.557	748.55	727.473	827.482
1454015_a_at	Cdh13	cadherin 13	263.717	243.281	230.833	229.147	236.878	226.755	317.751	278.693	315.028	217.34	248.17	135.206	226.232	201.561	154.18	206.431	159.94	189.412
1441891_x_at	Elovl7	ELOVL family member 7, elongation of long chain fatty acids (yeast)	130.533	215.641	211.121	208.183	178.619	187.289	145.506	127.643	67.3078	157.924	101.386	136.186	157.62	234.926	101.359	178.07	134.509	138.316
1449228_at	Sh3gl2	SH3-domain GRB2-like 2	252.8	285.487	85.9282	242.345	121.194	204.713	205.937	179.262	94.2376	166.974	159.491	195.024	191.421	226.542	144.431	274.88	140.402	163.827
1433768_at	Palld	palladin, cytoskeletal associated protein	248.486	187.55	284.845	247.693	274.113	282.054	296.283	220.845	446.97	244.148	442.345	330.097	261.219	203.576	366.418	211.627	253.684	212.994
1424701_at	Pcdh20	protocadherin 20	759.579	710.691	624.231	619.819	625.296	632.782	727.211	723.679	1140.46	555.615	1143.4	619.741	622.553	656.095	1097.05	596.386	770.026	637.047
1431896_at	Six6os1	Six6 opposite strand transcript 1	864.708	1016.82	695.262	907.194	511.711	670.963	968.66	714.882	754.866	643.989	1231.3	580.319	1118.35	671.166	926.888	555.023	686.606	699.743
1437291_at	2700081O15Rik	RIKEN cDNA 2700081O15 gene	104.131	110.73	96.3442	109.33	120.192	102.414	146.039	128.899	210.798	91.4241	190.128	117.899	124.938	121.308	161.201	104.694	136.955	89.6429
1442108_at	---	---	172.354	214.671	79.7664	144.296	93.9248	119.584	144.45	104.385	70.88	123.155	108.814	94.1235	156.761	158.408	86.2807	159.586	106.792	164.249
1429053_at	1110012J17Rik	RIKEN cDNA 1110012J17 gene	1325.96	1087.41	1140.09	1033.57	986.729	1038.57	713.347	830.762	583.763	1401.83	655.77	881.766	825.299	1312.83	1070.35	1305.3	1162.5	1554.98
1417514_at	Ssx2ip	synovial sarcoma, X breakpoint 2 interacting protein	209.76	202.566	79.0419	189.726	102.789	167.109	145.564	163.417	60.5138	154.807	117.344	151.18	124.582	147.468	122.511	178.476	103.461	134.458
1442886_at	---	---	180.993	424.588	206.94	396.675	226.437	304.98	476.278	411.156	306.607	461.849	272.737	242.755	485.852	344.634	282.582	412.239	339.261	340.839
1447550_at	EG666892	predicted gene, EG666892	203.869	189.562	274.83	151.36	231.841	182.449	163.056	158.263	345.711	105.823	246.158	154.275	212.743	153.296	226.945	131.006	222.664	134.432
1429158_at	Fbxo28	F-box protein 28	122.364	174.673	99.9471	135.501	97.9413	132.69	135.369	154.551	83.5113	182.716	74.7966	121.836	125.116	170.876	95.3076	140.427	74.3767	121.92
1416630_at	Id3	inhibitor of DNA binding 3	544.416	434.632	944.234	548.894	539.275	574.951	571.602	314.309	975.702	452.243	802.016	535.66	526.9	356.978	580.851	383.715	623.855	781.239
1437241_at	Klf11	Kruppel-like factor 11	131.632	99.972	108.312	73.1649	92.8304	85.3968	68.9671	90.6999	158.42	40.9447	110.413	88.453	120.572	68.8874	134.422	73.0673	121.548	83.5218
1417345_at	2900064A13Rik	RIKEN cDNA 2900064A13 gene	171.654	153.989	82.0452	140.164	122.608	132.068	107.202	135.183	13.9603	103.254	68.1197	100.37	103.967	131.059	83.4964	166.733	76.6953	157.018
1418911_s_at	Acsl4	acyl-CoA synthetase long-chain family member 4	193.959	196.082	128.269	271.932	171.138	215.308	229.789	228.539	99.3436	297.268	174.924	278.55	126.234	196.867	211.545	228.461	142.057	152.383
1449137_at	Pdha1	pyruvate dehydrogenase E1 alpha 1	382.145	349.209	144.055	352.707	175.948	297.299	285.104	305.269	142.618	257.873	208.68	277.904	233.458	294.722	225.262	309.152	183.341	283.472
1421493_a_at	Rgs20	regulator of G-protein signaling 20	140.665	128.747	145.217	103.125	134.587	104.654	91.6372	75.5811	44.2275	127.494	64.5845	166.617	91.5584	115.047	77.3816	114.564	119.584	126.41
1440455_at	Camk2n1	calcium/calmodulin-dependent protein kinase II inhibitor 1	122.97	113.174	111.5	122.987	105.857	115.129	122.022	129.935	204.811	133.108	141.843	138.615	120.8	354.972	134.514	134.86	130.473	127.123
1436066_at	Kalrn	kalirin, RhoGEF kinase	194.037	223.529	261.957	244.961	253.156	244.757	212.26	250.439	409.682	208.823	213.721	192.912	198.552	898.859	269.487	246.05	242.624	232.217
1431355_s_at	Trpm7	transient receptor potential cation channel, subfamily M, member 7	80.7546	119.26	90.7733	115.696	98.7777	111.027	127.236	113.375	112.439	115.06	185.6	99.1101	171.592	102.885	188.574	87.9345	133.525	155.085
1424658_at	Taok1	TAO kinase 1	239.292	403.15	219.392	389.176	281.74	306.819	201.735	229.902	52.2164	263.006	193.736	259.334	292.249	182.959	138.073	415.133	196.108	296.197
1424474_a_at	Camkk2	calcium/calmodulin-dependent protein kinase kinase 2, beta	231.462	330.206	266.702	290.565	299.75	317.724	283.797	372.094	242.162	322.461	247.621	340.356	232.81	511.62	356.666	345.434	303.56	336.191
1438774_s_at	Pgm2l1	phosphoglucomutase 2-like 1	1807.04	2248.16	1604.94	2287.97	1696.7	1792.76	1442.99	1479.41	825.544	1453.78	611.283	1598.61	1474.08	1614.94	874.671	1744.6	1257.19	1855
1443877_a_at	Rapgef6	Rap guanine nucleotide exchange factor (GEF) 6	105.492	207.596	141.978	283.171	159.912	127.352	142.954	109.793	40.1332	170.792	59.9837	129.44	159.791	131.878	88.5089	176.123	102.65	157.363
1450174_at	Ptprt	protein tyrosine phosphatase, receptor type, T	265.025	288.258	223.885	175.746	215.095	207.46	154.542	180.939	92.3375	173.183	91.3254	154.665	201.974	254.366	78.1603	189.976	124.877	174.178
1443282_at	Prpf38a	PRP38 pre-mRNA processing factor 38 (yeast) domain containing A	118.052	106.342	108.654	109.769	110.338	107.023	83.5343	82.3752	172.416	90.3491	166.705	110.257	113.56	68.2783	160.412	102.072	119.811	98.1073
1456295_at	B230114P17Rik	RIKEN cDNA B230114P17 gene	113.211	135.188	190.478	143.502	142.429	165.291	186.202	171.173	215.499	136.299	215.169	142.958	135.501	136.686	270.37	125.069	171.336	90.6728
1425206_a_at	Ube3a	Ubiquitin protein ligase E3A (Ube3a), transcript variant 2, mRNA	130.16	224.139	80.5179	234.136	110.912	156.093	180.218	190.176	59.8452	205.97	118.695	150.842	136.396	113.117	132.536	166.741	95.7077	141.309
1452380_at	Epha7	Eph receptor A7	139.305	126.182	121.071	216.14	130.378	152.055	127.399	138.407	81.5218	146.384	67.0404	128.372	82.2179	182.766	67.3958	128.533	98.3708	82.223
1416166_a_at	Prdx4	peroxiredoxin 4	500.062	678.849	860.499	562.823	1081.73	612.123	986.754	564.894	506.003	606.206	608.162	599.786	635.908	636.278	716.488	498.441	654.329	326.719
1417568_at	Ncald	neurocalcin delta	1073.08	1051.43	785.565	1117.48	796.595	1023.76	830.285	869.347	387.618	965.858	461.89	895.875	988.061	991.385	618.183	1086.76	861.424	1020.38
1440346_at	Jmjd3	Jumonji domain containing 3, mRNA (cDNA clone IMAGE:1378940)	197.333	239.511	113.274	216.753	166.408	221.787	262.943	537.086	71.1582	438.753	274.961	259.381	182.602	365.264	312.852	256.88	172.717	200.863
1447223_at	---	---	906.432	825.897	995.92	655.745	948.226	777.303	365.231	320.656	521.279	338.859	620.833	480.772	800.688	367.099	612.962	469.689	739.294	551.374
1456487_at	Adcy1	adenylate cyclase 1	211.346	265.826	192.602	195.814	215.252	216.293	245.601	227.225	267.831	243.514	200.18	239.058	228.77	629.452	177.76	267.077	214.444	231.907
1436761_s_at	Fam13c	family with sequence similarity 13, member C	614.621	740.342	781.406	748.864	667.857	786.773	1099.4	1342.17	581.813	953.418	512.063	638.466	734.694	1302.98	608.353	925.771	746.228	714.312
1434955_at	39873	membrane-associated ring finger (C3HC4) 1	246.548	263.761	201.282	285.023	259.323	294.391	203.604	230.186	121.488	220.86	128.276	266.634	196.639	246.632	165.616	273.083	202.516	200.563
1457032_at	Ak5	adenylate kinase 5	625.451	622.869	497.878	589.958	605.589	647.507	536.653	573.88	321.258	579.453	299.605	717.866	597.63	668.913	411.49	758.255	567.001	702.761
1435128_at	Baiap2	brain-specific angiogenesis inhibitor 1-associated protein 2	200.502	168.505	202.342	191.802	198.189	218.786	150.598	180.659	266.223	286.252	133.328	359.656	177.522	215.85	201.367	267.589	226.037	338.275
1455993_at	Odz4	odd Oz/ten-m homolog 4 (Drosophila)	529.897	562.937	630.431	280.857	554.731	362.932	348.666	438.468	727.532	327.543	521.315	430.605	502.966	400.282	435.238	336.735	505.189	447.718
1424270_at	Dclk1	doublecortin-like kinase 1	347.967	463.775	270.2	385.438	313.098	385.585	475.527	968.091	284.113	588.534	345.513	362.426	350.027	755.179	392.878	482.697	393.724	485.783
1437079_at	Slc18a2	solute carrier family 18 (vesicular monoamine), member 2	375.39	580.027	405.638	692.33	357.685	510	388.596	419.953	166.308	451.077	210.362	406.819	457.141	378.886	395.91	515.861	418.591	434.212
1428936_at	Atp2b1	ATPase, Ca++ transporting, plasma membrane 1	1653.73	1705.5	1298.68	1591.18	1364.45	1533.92	1190.82	1320.82	1228.07	1407.47	885.379	1182.34	1594.87	1936.82	997.154	1816.6	958.618	1696.57
1427606_at	Usp27x	ubiquitin specific peptidase 27, X chromosome	148.831	173.811	87.5632	133.628	91.6068	144.983	89.2529	191.998	77.2186	151.24	111.324	123.85	97.2329	126.975	88.7053	154.408	129.043	111.59
1455237_at	Usp36	ubiquitin specific peptidase 36	281.196	241.642	214.501	223.26	216.912	195.3	181.542	393.583	312.319	277.362	216.487	205.081	246.226	259.038	246.106	248.248	236.835	218.432
1436743_at	Cadm2	cell adhesion molecule 2	212.603	276.361	264.252	271.083	276.634	284.679	225.207	230.716	55.2873	257.918	130.81	257.472	231.209	340.417	166.404	273.396	206.733	262.882
1423622_a_at	Ccnl1	cyclin L1	1282.98	1491.86	919.275	1089.4	839.94	1002.46	1024.25	2474.4	1291.99	1214.8	1414.5	878.443	1138.66	1425.59	1273.83	1158.34	1066.78	1050.31
1439008_at	Zfp319	zinc finger protein 319	104.82	92.0684	105.277	100.704	106.906	105.795	86.833	59.7546	150.56	85.8502	124.125	105.882	104.423	83.4657	113.935	96.2682	105.125	78.8875
1418025_at	Bhlhe40	basic helix-loop-helix family, member e40	951.536	955.255	1010.9	853.033	863.527	831.548	636.556	1163.77	556.784	703.952	454.76	722.286	663.892	1167.86	648.388	824.199	876.046	910.546
1437100_x_at	Pim3	proviral integration site 3	1107.6	1162.22	1157.51	1101.38	1235.59	1123.9	878.714	1878.29	699.704	986.379	930.528	968.994	946.331	1249.71	940.98	1111.46	1020.8	1085.39
1445691_at	Chn1	chimerin (chimaerin) 1	255.467	244.104	143.272	252.642	213.084	245.668	209.577	213.084	114.009	205.275	120.989	185.79	186.921	202.84	116.136	252.813	136.102	183.349
1442659_at	Pcdh9	protocadherin 9	1413.94	1724.84	1114.5	1630.39	1310.8	1405.29	1307.48	1443.06	584.054	1363.73	860.033	1335.95	1612.27	1292.35	868.606	1710.2	1297.97	1848.54
1449130_at	Cd1d1	CD1d1 antigen	112.212	138.527	120.869	159.564	130.366	162.916	99.4752	109.49	47.0268	146.059	64.4983	119.408	105.565	130.403	91.4698	131.924	129.434	124.658
1431315_at	Hyls1	hydrolethalus syndrome 1	116.599	91.7658	89.3664	97.6881	89.3159	116.377	126.267	102.845	74.6192	94.2315	146.122	97.3386	88.9153	115.42	139.166	103.172	100.19	60.6503
1457743_at	---	---	945.802	977.505	668.366	1041.04	834.003	1139.36	1142.13	1078.34	613.565	960.97	450.625	938.779	823.885	1248.87	582.994	1049.31	711.222	753.988
1448663_s_at	Mvd	mevalonate (diphospho) decarboxylase	192.141	165.747	165.405	158.479	162.426	106.562	126.546	117.436	138.836	131.608	156.241	135.292	151.153	134.662	130.542	108.067	144.16	72.5575
1453119_at	Otud1	OTU domain containing 1	133.469	137.113	158.532	146.154	176.022	144.731	161.584	338.584	144.139	213.712	151.692	168.354	161.083	317.634	176.301	171.004	138.451	136.364
1451069_at	Pim3	proviral integration site 3	147.49	163.414	183.966	168.327	178.305	160.526	129.331	283.696	111.44	128.759	108.778	117.33	142.218	177.887	97.4579	143.215	138.054	127.599
1431422_a_at	Dusp14	dual specificity phosphatase 14	293.407	274.56	252.86	264.896	200.102	217.416	207.524	291.179	206.029	440.269	233.815	239.84	263.25	444.056	300.801	407.426	278.274	280.91
1428759_s_at	Ccdc49	coiled-coil domain containing 49	131.717	164.141	142.812	139.15	183.36	140.799	113.785	483.626	132.52	181.661	112.831	123.881	134.053	230.501	153.599	155.588	124.973	120.933
1419748_at	Abcd2	ATP-binding cassette, sub-family D (ALD), member 2	138.038	164.946	145.913	179.646	137.051	127.989	132.989	113.407	48.7465	155.207	70.566	143.797	142.285	133.636	107.042	197.367	88.5405	137.243
1419673_at	Spock1	sparc/osteonectin, cwcv and kazal-like domains proteoglycan 1	588.684	621.341	394.037	721.279	481.613	542.284	472.342	476.117	221.045	478.506	254.503	591.26	624.36	554.987	384.737	695.052	420.461	589.995
1449533_at	Tmem100	transmembrane protein 100	398.09	439.976	374.509	435.432	341.813	364.64	332.253	366.289	219.472	411.074	231.154	426.079	348.242	577.939	245.081	416.769	341.844	390.44
1449100_at	Pard6a	par-6 (partitioning defective 6,) homolog alpha (C. elegans)	464.314	415.036	409.666	341.506	403.038	323.568	283.121	517.696	222.673	416.081	224.183	288.257	354.449	537.279	286.892	398.923	392.415	386.419
1437726_x_at	C1qb	complement component 1, q subcomponent, beta polypeptide	896.169	992.23	1227.7	817.06	1110.35	854.141	1135.25	936.442	547.945	855.667	524.143	802.277	912.553	1244.98	612.91	744.055	960.198	650.989
1435396_at	Stxbp6	syntaxin binding protein 6 (amisyn)	361.866	392.928	416.308	414.918	413.231	461.257	357.918	325.848	201.256	378.26	125.055	423.274	343.485	451.126	284.575	459.568	400.152	417.47
1434298_at	Zeb2	zinc finger E-box binding homeobox 2	145.101	182.2	238.243	224.159	223.384	217.859	250.473	190.108	110.431	190.899	117.035	207.499	194.328	263.461	118.374	175.594	135.989	151.421
1417357_at	Emd	emerin	724.565	776.537	785.79	704.622	680.908	597.899	503.905	1206.07	739.1	1293.43	618.775	968.938	669.407	951.642	678.118	896.727	662.217	919.255
1419639_at	Efnb2	ephrin B2	446.254	648.23	592.6	629.276	685.979	618.734	568.845	671.083	289.937	636.278	224.739	618.285	506.958	737.375	364.441	648.39	552.404	608.694
1455925_at	A730035I17Rik /// LOC100045224	RIKEN cDNA A730035I17 gene /// similar to PR domain containing 8	145.832	136.455	137.246	136.239	182.512	172.205	191.885	167.565	98.8703	174.981	102.467	159.269	159.533	238.318	105.914	182.331	132.905	167.502
1448557_at	Fam13c	family with sequence similarity 13, member C	995.274	1092.01	1211.01	1463.64	1076.16	1177.77	1049.08	2066.43	818.846	1778.49	859.879	1208.51	1095.01	2038.07	1183.35	1618.27	1103.26	1091.4
1436532_at	Dclk3	doublecortin-like kinase 3	245.57	239.671	153.88	215.002	195.542	245.843	223.669	193.539	108.713	200.131	63.9739	238.409	190.465	227.226	138.224	260.161	197.016	208.919
1416129_at	Errfi1	ERBB receptor feedback inhibitor 1	639.677	754.131	651.631	746.488	680.996	725.719	711.688	1519.72	689.392	1304	671.582	649.591	624.031	901.66	661.614	803.448	597.696	591.092
1424475_at	Camkk2	calcium/calmodulin-dependent protein kinase kinase 2, beta	102.234	127.579	126.808	129.924	137.418	129.695	127.423	134.573	119.757	128.572	91.6445	130.053	104.905	219.426	110.004	151.345	120.143	139.123
1415834_at	Dusp6	dual specificity phosphatase 6	307.921	413.831	337.264	439.107	405.781	390.124	473.447	678.552	260.808	535.031	256.673	346.81	311.834	629.511	322.828	393.239	379.831	368.777
1436931_at	Rfx4	regulatory factor X, 4 (influences HLA class II expression)	898.271	1277.6	1205.46	1577.86	1035.27	1281.77	1049.63	1039.96	893.024	2826.34	833.189	1605.49	1015.77	1035.17	929.382	1845.04	1030.63	1857.54
1436876_at	Rgs7bp	regulator of G-protein signalling 7 binding protein	439.968	513.505	430.704	444.411	404.706	462.938	393.099	451.939	348.751	392.626	205.98	374.777	455.595	612.338	255.06	483.22	352.685	426.321
1455166_at	Arl5b	ADP-ribosylation factor-like 5B	360.591	392.959	395.388	365.513	368.968	385.757	365.944	1025.27	339.034	562.24	420.855	400.37	350.972	520.142	416.37	412.765	444.9	415.626
1437059_at	Sox21	SRY-box containing gene 21	144.256	191.485	178.082	175.957	173.778	136.711	179.877	193.356	123.94	167.499	50.918	134.583	142.889	270.476	138.72	197.318	106.63	92.4565
1441706_at	Dscaml1	Down syndrome cell adhesion molecule-like 1	322.139	377.992	358.347	382.712	416.703	429.554	390.138	340.437	153.076	365.055	202.611	432.481	329.793	373.559	345.31	367.887	364.601	490.385
1429211_at	2900078E11Rik /// Cadm2	RIKEN cDNA 2900078E11 gene /// cell adhesion molecule 2	1215.43	1577.99	1594.33	1512.9	1565.1	1530.68	1292.97	1191.79	832.239	1280.88	816.904	1312.51	1297.77	1781.58	875.78	1328.73	1231.12	1178.14
1455130_at	Spty2d1	SPT2, Suppressor of Ty, domain containing 1 (S. cerevisiae)	450.836	453.608	440.702	492.77	510.382	516.558	515.91	1196.18	360.864	529.929	424.79	427.62	394.564	618.161	380.361	441.435	382.369	362.695
1416700_at	Rnd3	Rho family GTPase 3	727.059	729.021	672.556	948.177	828.169	952.003	672.397	745.629	453.368	1337.15	499.852	1075.03	723.35	964.367	788.98	1105.38	770.909	938.722
1434967_at	Zswim6	zinc finger, SWIM domain containing 6	429.344	431.108	499.14	736.114	469.619	469.148	436.251	408.871	326.501	1137.71	330.058	442.226	448.235	708.824	429.134	799.874	443.926	405.473
1456785_at	Med14	mediator complex subunit 14	106.334	126.299	106.448	125.775	108.228	107.506	113.809	97.0745	69.7799	138.591	77.5128	175.085	106.017	107.274	84.9838	126.386	106.701	107.013
1460081_at	Syt7	synaptotagmin VII	919.598	965.645	746.27	832.687	877.044	840.89	760.734	763.82	423.456	769.56	385.031	850.955	830.653	1054.21	634.886	870.943	857.777	883.328
1433883_at	Tpm4	tropomyosin 4	680.477	726.013	659.05	700.64	665.749	683.349	598.815	999.194	572.083	1313.81	612.953	1028.86	612.716	1112.72	678.204	1068.17	669.735	850.144

## Sheet: Suppl file 2B
Supplementary File 2B. Transcripts showing both light-regulation and rhythmic expression.
Naming convention: 1LCT30, e.g., refers to the value at 1h after light pulse at CT30. "D" refers to the dark control.
Probe Set ID	Gene Symbol	Gene Title	1DCT30	1DCT40	1DCT46	1LCT30	1LCT40	1LCT46	2LCT30	2LCT40	2LCT46	4LCT30	4LCT40	4LCT46	CT18	CT20	CT22	CT24	CT26	CT28	CT30	CT32	CT34	CT36	CT38	CT40	CT42	CT44	CT46	CT48	CT50	CT52	CT54	CT56	CT58	CT60	CT62	CT64
1427624_s_at	Il22 /// Iltifb	interleukin 22 /// interleukin 10-related T cell-derived inducible factor beta	43.3239	810.777	302.213	34.2244	525.407	254.565	36.378	465.065	185.87	91.4988	897.886	176.368	857.068	797.646	351.991	338.645	166.936	80.2589	100.342	57.0031	98.6188	266.722	601.565	1746.11	2101.13	1451.38	1582.84	639.424	350.648	61.6747	23.3349	37.1286	61.0279	136.506	359.089	530.865
1445815_at	Fzd8	frizzled homolog 8 (Drosophila)	122.886	229.676	95.8405	69.9024	110.348	75.6794	95.5389	69.1017	50.7727	114.484	118.166	95.0929	246.011	296.071	156.348	147.969	90.475	135.255	285.715	152.936	208.419	201.137	247.826	662.958	544.018	506.809	547.371	199.118	131.498	76.4391	55.889	92.6939	174.371	176.754	201.527	220.122
1426734_at	Fam43a	family with sequence similarity 43, member A	666.248	1779.76	1065.99	487.047	1175.6	735.914	590.942	1257.53	603.827	681.563	1442.64	616.437	1418.42	1587.12	947.479	1093.67	920.307	1001.15	1684.55	808.353	846.064	1236.24	2007.56	4229.44	3512.71	3114.22	3541.31	1662.46	983.628	561.63	332.452	590.849	741.116	883.109	1806.52	1299.74
1448823_at	Cxcl12	chemokine (C-X-C motif) ligand 12	94.2346	302.612	256.717	72.443	232.383	265.929	103.73	174.471	134.117	74.1662	153.705	91.4872	318.948	382.855	262.289	246.639	212.809	217.535	286.744	103.511	84.0673	87.6728	164.262	828.929	651.742	881.877	936.538	552.182	273.639	135.206	92.1245	76.5295	63.9882	283.868	124.214	197.267
1424383_at	Tmem51	transmembrane protein 51	316.375	325.292	705.101	200.714	279.025	466.089	183.783	287.43	405.155	151.171	404.957	405.774	438.476	600.924	514.956	650.992	594.891	667.112	1029.5	250.248	207.69	191.375	228.851	695.088	714.28	1165.66	1660.69	994.815	649.336	428.372	314.223	227.228	192.001	115.463	179.438	259.673
1421391_at	Vipr2	vasoactive intestinal peptide receptor 2	187.185	304.297	272.958	90.4926	282.611	211.694	124.519	244.486	142.396	142.233	212.289	126.708	304.541	343.331	179.234	220.854	171.607	160.363	406.574	117.092	123.789	178.373	230.239	651.936	603.872	815.694	780.567	437.915	226.03	92.8931	69.4716	92.9817	135.532	138.039	258.307	183.92
1418604_at	Avpr1a	arginine vasopressin receptor 1A	88.0414	314.119	152.028	95.0322	240.126	142.895	97.7209	158.263	79.4582	102.33	163.199	40.8528	324.943	299.277	204.93	144.853	70.4092	65.6857	158.666	138.825	100.669	143.981	280.484	732.685	851.018	723.134	643.936	167.789	112.284	50.7604	41.9862	70.0494	106.059	130.232	280.613	239.989
1423619_at	Rasd1	RAS, dexamethasone-induced 1	1202.2	3525.06	991.584	845.586	2582.66	660.435	915.238	2715.22	571.94	1637.87	4282.73	751.718	3967.46	3028.52	1391.79	833.473	796.144	1084.04	1967.78	1406.5	1823.62	3846.83	4537.18	8132.52	7927.69	6260.48	4699.24	1644.33	1225.82	630.588	633.849	881.58	1633.22	2583.26	4557.4	3249.99
1418603_at	Avpr1a	arginine vasopressin receptor 1A	274.459	709.629	392.336	178.085	543.138	267.56	204.72	335.077	149.71	194.734	384.208	151.027	633.003	627.435	456.088	368.208	167.602	161.904	422.96	345.527	280.696	329.877	612.353	1496.52	1527.87	1360.24	1411.62	456.771	230.21	150.553	145.655	215.778	231.726	268.53	529.589	587.102
1433909_at	Syt17	synaptotagmin XVII	1179.56	1915.59	2018.03	1024.45	1871.84	1636.16	896.532	1550.92	1183.65	980.392	1134.38	953.3	2199.53	2462.24	1809.55	1887.3	1237.44	1169.97	1880.87	1111.78	1096.48	1144.65	1460.33	3939.83	5329.67	4458.28	4581.28	2630.18	1730.86	961.665	979.988	982.264	983.052	982.034	1418.9	1581.88
1457265_at	Sfrs17b	splicing factor, arginine/serine-rich 17b	1847.09	2864.9	2434.51	1438.55	2521.66	1972.11	1522.34	2121.77	1615.98	1583.19	2277.43	1799.83	2925.19	3214.03	2280.36	2593.24	1991.35	2009.23	3537.02	1693.96	1629.05	1921.54	2724.85	5924.87	6377.95	5912.46	5793.06	3654.78	2358.83	1616.19	1479.54	1777	1753.72	1503.08	2513.9	2437.73
1424007_at	Gdf10	growth differentiation factor 10	189.936	374.865	190.119	218.779	231.61	212.884	176.941	280.342	138.113	254.234	186.238	157.134	349.902	359.726	223.062	202.153	193.974	230.082	422.043	192.605	248.741	355.665	326.503	631.976	611.81	505.345	518.444	521.073	282.119	182.155	248.296	193.066	294.61	336.656	311.222	360.154
1456096_at	6430573F11Rik	RIKEN cDNA 6430573F11 gene	133.99	250.257	199.597	80.349	197.347	132.302	111.616	146.615	106.691	120.532	173.648	95.7468	273.22	264.292	228.97	174.617	138.723	95.4466	223.918	118.798	115.149	136.623	184.252	388.506	715.617	446.656	507.744	256.944	175.986	84.6906	77.9541	111.064	84.8897	134.529	139.689	158.085
1436444_at	6030405A18Rik	RIKEN cDNA 6030405A18 gene	192.99	425.252	218.686	148.769	279.401	187.126	189.944	120.944	144.885	239.597	265.878	104.405	475.42	393.6	317.572	127.365	108.578	144.406	234.118	221.116	245.588	298.778	452.765	890.383	928.459	816.836	730.274	223.936	178.72	132.223	153.812	183.29	204.646	265.265	452.911	315.504
1435460_at	Prkg2	protein kinase, cGMP-dependent, type II	482.246	867.784	710.576	359.344	892.356	556.51	339.176	697.413	351.908	404.735	656.164	449.22	942.927	1030.42	685.816	733.93	474.832	523.783	932.444	539.702	547.067	622.654	777.853	2133.08	1617.79	1924.83	2140.15	1028.28	503.342	371.896	333.442	401.223	422.322	470.744	658.07	666.05
1422955_at	Syt17	synaptotagmin XVII	221.458	420.229	403.667	179.968	384.47	348.987	178.295	252.627	249.427	186.522	197.906	151.57	434.076	520.199	367.218	382.063	230.254	251.561	444.394	242.462	235.266	237.552	362.931	969.617	743.284	832.929	803.201	510.49	305.818	145.193	132.611	176.084	165.827	157.134	233.666	286.214
1435162_at	Prkg2	protein kinase, cGMP-dependent, type II	460.854	1068.83	739.726	373.251	963.757	595.544	413.706	785.614	468.714	505.465	728.186	439.936	977.659	1068.96	741.327	801.341	532.518	510.345	864.922	635.938	618.592	586.077	838.221	2008.07	1971.11	2144.84	2314.01	930.442	584.029	410.591	361.228	404.077	496.098	533.675	681.617	786.903
1429625_at	2900054C01Rik	RIKEN cDNA 2900054C01 gene	1063.9	1865.89	1452.23	1090.44	1839.98	1389.06	1043.14	1245.77	1084.06	1193.18	1444.87	1032.96	1635.81	2116.46	1621.84	1697.88	1119.73	1208.67	1831.59	1385.65	1359.41	1359.01	1969.91	3756.58	3010.79	2924.11	2831.49	2252.32	1288.13	1028.89	1297.91	1389.06	1246.13	1115.26	1827.61	1691.96
1423348_at	Fzd8	frizzled homolog 8 (Drosophila)	114.826	272.021	139.072	101.531	91.1336	93.1909	105.939	113.066	78.1438	115.028	173.888	69.1113	235.998	218.16	154.75	96.1708	77.2568	106.316	244.159	107.806	140.093	240.126	230.381	655.813	467.18	314.991	398.844	112.894	113.278	75.9412	67.1525	91.7438	90.4631	105.587	168.388	146.427
1421354_at	Prkg2	protein kinase, cGMP-dependent, type II	102.813	230.458	163.43	67.9515	219.038	134.883	91.2009	165.353	109.631	122.806	150.242	96.2335	251.783	216.665	141.102	173.944	114.337	117.919	209.185	127.051	111.137	115.371	184.776	544.878	370.635	451.665	523.877	211.94	132.173	56.1573	50.1002	69.341	98.3741	86.7039	126.239	157.739
1454795_at	Cobll1	Cobl-like 1	640.296	1982.26	1007.91	554.906	1618.51	992.689	752.255	1092.67	671.11	884.841	1198.49	648.66	1445.04	1407.42	1037.5	996.629	806.337	793.987	1015.56	816.834	781.733	905.082	1658.73	3447.13	2381.06	2617.17	2395.87	1445.21	974.173	682.071	597.551	731.862	780.845	732.733	1527.86	1422.15
1450976_at	Ndrg1	N-myc downstream regulated gene 1	1118.45	1334.49	1068.2	896.781	1356.52	884.822	889.12	1229.15	911.203	1028.24	1125.1	1019.41	1747.03	1624.8	1071.62	1091.76	1159.75	1354.46	1797.09	1350.65	1042.68	1037.59	1422.84	2909.36	4379.18	2723.34	2323.06	1411.17	1117.96	926.088	834.664	960.14	1159.39	1151.25	1319.12	1346.86
1419417_at	Vegfc	vascular endothelial growth factor C	91.8036	154.003	115.074	94.2184	162.598	92.0863	101.637	104.81	63.0219	110.973	110.092	58.1838	130.986	203.2	119.448	99.0683	70.5966	110.657	195.323	111.588	120.984	130.917	168.204	380.573	313.751	257.816	327.483	123.333	99.9121	76.854	66.3559	97.1401	108.145	133.988	140.125	131.49
1455604_at	Fzd5	frizzled homolog 5 (Drosophila)	216.526	225.826	271.409	202.482	201.201	172.802	138.564	151.813	131.367	129.772	203.204	127.06	269.207	277.422	281.622	324.592	230.435	256.398	405.312	229.568	172.154	161.477	207.338	470.895	299.944	444.771	638.558	467.406	287.021	196.353	141.96	170.478	190.983	134.778	192.81	171.938
1450990_at	Gpc3	glypican 3	570.414	349.49	481.219	372.078	424.178	406.64	336.662	401.623	375.925	338.271	393.657	402.83	416.011	497.712	440.62	583.495	553.44	628.076	1256.24	430.411	384.145	341.131	322.285	660.814	705.572	889.094	1059.91	924.146	584.022	464.658	423.295	444.862	390.424	321.63	297.635	283.669
1419517_at	Cnih3	cornichon homolog 3 (Drosophila)	157.864	163.332	279.702	159.581	171.132	226.719	143.181	140.807	172.665	136.529	138.315	138.369	270.119	254.354	189.021	258.879	227.812	225.642	205.82	262.295	180.064	145.535	186.797	304.421	415.947	334.221	369.373	204.535	188.478	122.941	146.003	92.6471	131.39	181.525	189.986	161.586
1438407_at	Dsel	dermatan sulfate epimerase-like	1009.82	1608.97	1821.09	964.102	1505.47	1387.03	966.58	1058.01	1102.18	934.187	1246.15	920.938	1913.93	2161.18	2014.46	1833.86	955.957	1053.64	1343.58	1166.79	1030.85	1072.28	1553.6	2535.11	2293.07	2780.98	3044.6	2263.44	1461.35	1042.36	1209.72	1188.67	984.487	952.128	1341.01	1525.74
1446771_at	Tuba8	tubulin, alpha 8	82.6949	459.936	159.022	79.4173	410.282	176.852	88.8579	417.708	126.995	107.042	460.661	91.7001	421.205	388.052	227.167	168.818	112.316	83.7779	115.933	94.3704	110.16	158.456	305.983	851.912	876.651	725.59	669.773	280.651	130.731	54.4312	54.3526	66.0935	116.39	127.216	242.584	329.343
1417155_at	Mycn	v-myc myelocytomatosis viral related oncogene, neuroblastoma derived (avian)	86.1136	230.358	99.4798	93.5818	183.965	122.534	95.4274	186.882	87.5206	74.5162	181.048	83.5202	224.138	215.625	175.512	132.575	114.173	128.772	172.166	117.407	114.662	149.63	228.321	453.151	442.973	360.797	337.766	235.946	135.427	87.1885	76.2873	82.5376	91.5079	102.816	207.732	177.93
1423450_a_at	Hs3st1	heparan sulfate (glucosamine) 3-O-sulfotransferase 1	292.999	451.912	292.076	268.301	320.607	211.682	290.22	222.058	183.872	283.251	452.535	203.707	442.905	395.695	350.91	255.585	241.717	295.323	313.363	348.236	306.532	411.647	471.982	921.99	852.28	684.736	792.674	270.808	231.693	249.751	282.488	261.906	300.291	390.795	512.432	393.133
1429286_at	1190003M12Rik	RIKEN cDNA 1190003M12 gene	65.4196	204.332	54.4177	74.987	224.184	61.5341	61.1307	117.027	53.9402	93.0407	84.4798	32.9594	161.205	166.492	143.373	74.507	117.719	76.5307	56.7814	104.589	102.973	130.643	162.627	173.953	204.682	252.709	107.793	88.673	87.92	58.2051	81.1958	65.5683	96.455	138.508	101.086	142.95
1421137_a_at	Pkib	protein kinase inhibitor beta, cAMP dependent, testis specific	1242.67	2816.83	2085.67	934.785	2177.71	2086.15	1036.34	2153.55	1627.73	1263.3	1697.87	1303.47	2463	2709.55	2004.3	2101.58	1937.91	1745.14	1959.24	1405.16	1335.07	1290.7	1963.84	4136.51	3662.83	4256.45	4113.55	2669.71	1779.55	1120.53	750.619	1035.74	1174.1	1097.22	1576.94	1791.06
1434572_at	Hdac9	histone deacetylase 9	794.581	1487.86	1131.48	724.363	1373.81	1318.77	846.054	1016.46	997.162	860.238	745.805	654.397	1316.95	1511.66	1231.15	1318.28	1149.95	1081.88	1426.04	1058.07	913.957	1043.29	1167.16	2435	1951.67	1862.39	2501.23	1588.31	1118.74	813.05	602.907	913.337	871.372	844.12	1083.38	1185.32
1425296_a_at	Rgs3	regulator of G-protein signaling 3	250.955	292.331	283.975	239.317	198.146	167.513	217.816	152.131	219.785	234.436	302.96	257.723	340.079	334.324	285.462	216.961	226.361	262.974	209.508	246.52	241.628	243.845	301.284	407.842	413.138	426.422	412.252	225.404	258.971	221.923	262.234	288.347	291.481	299.255	312.74	345.786
1450945_at	Prkca	protein kinase C, alpha	95.0107	136.876	85.9874	72.6312	115.837	114.709	85.0255	135.227	86.4716	85.9925	109.472	67.3776	110.159	122.495	102.954	134.054	81.8961	67.2128	158.184	84.4978	97.9721	93.5647	135.914	315.834	205.865	191.22	214.433	166.542	85.5497	72.4699	73.9133	90.2779	85.4284	78.0467	120.841	131.368
1421138_a_at	Pkib	protein kinase inhibitor beta, cAMP dependent, testis specific	670.536	1329.32	970.733	498.799	1235.8	862.351	563.032	923.241	748.627	626.081	762.018	660.23	1244.35	1288.55	879.598	975.927	728.871	677.899	878.506	510.413	494.756	563.28	752.744	1540.86	2511.3	2268.21	2027.54	1286.25	822.242	508.662	397.272	463.043	481.977	482.733	704.368	843.394
1436566_at	Rab40b	Rab40b, member RAS oncogene family	584.586	1218.95	827.782	584.083	837.96	755.724	685.422	716.026	604.795	726.524	847.814	583.514	1017.22	1097.99	900.454	824.802	770.796	724.834	987.159	774.455	821.582	814.626	1142.95	2299.77	1771.01	1568.1	1894.04	985.645	707.957	595.953	461.866	652.949	711.695	669.532	894.89	996.328
1429506_at	Nkd1	naked cuticle 1 homolog (Drosophila)	94.1123	103.337	148.51	92.6375	137.579	114.013	88.3113	104.906	116.991	70.4138	78.9673	104.216	94.6388	125.729	104.695	117.992	155.241	131.806	196.323	60.815	62.9998	35.1899	98.763	285.167	203.29	191.051	269.341	163.998	116.49	95.0623	75.7412	59.4729	60.247	67.3562	88.864	99.4679
1451440_at	Chodl	chondrolectin	1519.91	897.936	1293.03	1013.02	825.652	990.44	1037.12	734.439	1038.9	752.075	892.278	1339.94	953.645	1053.57	1065.97	1465.43	1936.92	2202.58	3465.65	1645.75	932.322	721.402	846.456	1303.17	1504.52	1355.5	2125.47	1634.42	1498.86	1329.53	1210.64	1080.79	942.601	743.495	692.055	751.141
1452462_a_at	Banp	BTG3 associated nuclear protein	86.1996	169.391	128.023	106.723	136.377	178.122	117.099	126.977	122.932	68.4541	116.053	74.1472	153.6	148.23	101.989	139.73	79.1645	88.8203	105.725	80.2721	103.46	113.424	180.747	262.58	286.081	202.787	177.714	198.245	114.728	68.295	87.6167	99.3985	87.6599	79.2328	204.06	149.552
1431146_a_at	Cpne8	copine VIII	107.922	178.886	199.588	115.373	166.833	134.286	111.158	159.139	115.638	126.697	165.701	87.453	218.788	186.593	148.891	172.015	143.021	143.045	158.715	104.517	122.998	121.788	158.68	340.87	377.387	292.475	358.959	186.202	152.448	117.735	69.38	109.264	126.079	122.708	135.021	167.491
1428948_at	5730414M22Rik	RIKEN cDNA 5730414M22 gene	77.2251	162.834	92.6713	88.0419	187.956	133.191	55.5008	155.981	104.048	92.1938	146.335	72.8012	137.016	137.747	115.793	116.236	119.418	114.624	146.57	76.6576	68.1237	87.587	140.687	275.669	251.766	231.07	199.659	148.242	117.76	75.824	77.5246	86.4467	75.8778	70.951	118.677	126.742
1452714_at	Tanc1	tetratricopeptide repeat, ankyrin repeat and coiled-coil containing 1	230.099	378.737	310.491	230.841	321.927	289.672	196.995	258.191	220.514	202.605	209.491	188.014	349.711	340.706	248.781	338.255	193.045	217.241	203.297	243.79	231.181	190.161	233.539	467.437	487.316	534.762	480.557	367.078	232.728	206.925	210.444	191.899	225.426	214.939	219.685	314.378
1423530_at	Stk32c	serine/threonine kinase 32C	380.895	428.829	435.698	342.185	446.916	373.732	337.014	410.478	361.649	358.907	509.976	292.012	845.617	813.015	582.169	609.765	475.262	498.703	841.349	525.193	545.958	472.362	578.837	1162.54	793.855	697.209	900.313	589.865	406.967	351.071	377.433	346.014	341.418	467.695	415.22	554.655
1424062_at	Ube2d1	ubiquitin-conjugating enzyme E2D 1, UBC4/5 homolog (yeast)	504.409	687.243	610.636	534.853	575.177	494.64	552.26	422.649	408.935	542.563	574.499	435.404	738.222	739.461	673.759	629.549	500.129	619.573	579.148	645.691	602.425	518.417	699.623	1258.14	1327.19	938.422	1027.94	575.994	578.002	498.252	506.566	497.594	471.376	506.102	624.819	643.267
1449542_at	Pbx1	pre B-cell leukemia transcription factor 1	108.791	144.498	118.528	95.1332	154.452	157.368	97.0743	161.203	99.5388	80.8503	119.164	58.9827	160.664	166.695	150.222	166.808	102.708	100.73	179.192	106.16	109.321	108.532	154.943	297.427	269.529	231.993	247.395	176.884	114.779	88.5735	105.83	124.034	88.8615	87.0001	141.167	140.214
1456512_at	Pdzrn4	PDZ domain containing RING finger 4	186.512	304.139	234.13	155.647	273.067	239.455	205.481	256.736	211.258	212.377	116.966	153.396	295.317	295.009	304.071	292.12	161.764	134.227	116.038	186.441	206.817	192.77	195.721	423.717	281.837	251.658	308.572	333.177	244.491	168.46	154.683	172.708	177.135	167.466	171.415	286.198
1458176_at	Per3	Period homolog 3 (Drosophila) (Per3), mRNA	189.291	82.1609	97.775	175.669	79.1839	56.9021	129.417	46.021	53.9608	99.6655	58.394	98.6277	46.8285	41.0423	43.618	48.4868	82.648	99.3462	189.469	120.798	93.4893	107.141	61.8164	97.0963	104.878	100.332	98.0139	114.98	107.041	117.349	158.633	162.643	172.025	113.723	114.834	82.009
1437291_at	2700081O15Rik	RIKEN cDNA 2700081O15 gene	104.131	146.039	124.938	110.73	128.899	121.308	109.33	91.4241	104.694	102.414	117.899	89.6429	118.617	142.722	123.552	140.163	92.7161	72.9947	112.972	96.3442	120.192	98.359	139.599	183.308	210.798	190.128	190.487	161.201	136.955	111.472	116.642	106.567	90.0942	89.5486	115.21	136.591
1447223_at	---	---	906.432	365.231	800.688	825.897	320.656	367.099	655.745	338.859	469.689	777.303	480.772	551.374	524.672	577.304	600.996	529.542	642.852	846.176	1141.62	995.92	948.226	845.083	544.045	484.451	521.279	620.833	938.879	612.962	739.294	803.821	855.857	926.399	834.764	834.327	525.53	433.799
1452378_at	Malat1	metastasis associated lung adenocarcinoma transcript 1 (non-coding RNA)	4339.76	3535.1	4826.85	5378.83	3927.76	2923.67	5282.84	4267.56	4451.79	3656.91	1908.2	5214.36	1149.03	1397.5	1717.39	668.492	2045.01	1749.59	2236.79	1084.68	1187.65	1482.62	1367.67	1177.47	413.522	947.086	854.255	1455.38	1589.67	1766.63	1959.22	2342.25	1296.25	1454.23	898.928	906.473
1436387_at	C330006P03Rik	RIKEN cDNA C330006P03 gene	65.0371	201.231	80.1152	109.487	2229	2115.23	177.636	4503.01	1408.14	115.992	851.176	403.405	183.686	179.158	148.164	195.981	160.053	130.207	109.256	122.003	118.876	135.843	245.818	331.904	316.324	162.352	178.948	218.649	135.289	110.529	66.3086	102.539	104.411	95.7885	192.934	157.022
1423100_at	Fos	FBJ osteosarcoma oncogene	1308.42	552.208	1368.82	3104.06	14524.6	5416.85	936.22	1225.53	1319.43	512.971	372.889	1111.95	412.631	438.992	890.663	1418.14	1469.85	1048.42	2852.85	1002.26	663.864	760.445	761.5	488.68	288.394	309.026	866.693	1924.07	1114.98	711.872	784.266	947.943	565.981	450.657	754.517	396.403
1437247_at	Fosl2 /// LOC634417	fos-like antigen 2 /// similar to fos-like antigen 2	414.681	142.368	563.436	505.512	3081.31	4778.97	337.194	3296.6	2440	174.357	304.159	782.295	126.989	147.245	143.325	1000.2	1008.02	605.285	1072.85	267.335	171.007	133.047	176.012	229.987	159.947	161.925	234.911	1311.55	774.31	474.188	239.372	303.799	189.597	113.421	246.697	171.075
1438033_at	Tef	thyrotroph embryonic factor	312.655	199.96	196.43	375.891	148.409	160.075	317.682	143.99	211.036	225.896	119.032	267.372	82.746	78.1861	68.618	114.907	175.59	181.34	267.793	134.126	132.08	129.272	106.514	51.2067	50.5196	67.6037	84.9693	102.34	144.778	137.726	140.42	148.012	188.386	129.793	125.759	80.6429
1428834_at	Dusp4	dual specificity phosphatase 4	798.941	62.6604	360.926	653.8	746.367	790.153	419.229	378.442	552.23	269.459	107.316	643.513	82.817	82.4122	113.239	553.47	752.194	753.336	1690.3	589.04	271.549	121.765	64.1734	84.4527	106.013	80.4502	109.801	714.281	607.296	559.214	435.103	562.972	343.323	123.069	70.7552	52.4571
1455034_at	Nr4a2	nuclear receptor subfamily 4, group A, member 2	197.525	185.158	237.799	415.372	2001.18	2142.89	242.456	662.862	823.085	236.841	172.694	277.292	165.049	181.693	240.808	317.244	305.86	319.092	382.131	224.084	232.751	208.164	165.135	201.304	117.245	143.375	87.5619	351.277	319.619	280.589	206.468	220.398	204.038	192.288	182.995	235.392
1419647_a_at	Ier3	immediate early response 3	403.662	292.048	316.03	381.977	405.3	378.264	441.697	285.125	319.603	325.558	228.712	390.088	239.723	233.103	274.656	283.557	303.706	350.817	260.224	315.966	354.828	286.743	287.299	147.845	143.606	126.227	98.2817	151.572	312.828	357.589	411.806	360.453	331.832	368.388	267.571	237.225
1445669_at	Spry4	sprouty homolog 4 (Drosophila)	215.15	233.332	180.927	236.352	545.386	590.352	283.661	658.765	348.117	287.998	201.965	223.856	131.269	208.791	230.646	239.657	295.203	252.873	189.978	245.139	213.923	222.26	195.267	95.827	78.1292	71.7059	107.168	203.73	205.962	256.754	191.803	227.565	199.708	173.123	179.298	201.606
1455271_at	OTTMUSG00000014994	predicted gene, OTTMUSG00000014994	117.87	146.51	170.626	142.224	391.183	334.082	169.832	374.734	235.082	128.468	143.724	111.374	185.973	128.46	139.468	152.785	147.147	119.566	92.7181	141.358	123.16	95.1689	140.623	168.016	175.483	170.832	141.393	115.086	135.47	114.891	121.568	123.535	128.08	142.468	142.605	145.113
1416505_at	Nr4a1	nuclear receptor subfamily 4, group A, member 1	406.482	165.995	645.336	708.914	4401.74	1500.71	288.185	297.994	312.407	177.067	120.837	221.791	162.707	117.707	242.162	309.941	353.026	354.138	899.228	362.172	216.982	167.492	157.503	166.938	166.224	153.219	253.873	479.312	264.01	197.863	258.36	203.618	216.517	189.6	167.963	112.89
1449851_at	Per1	period homolog 1 (Drosophila)	882.8	219.564	511.722	823.256	970.987	1027.68	574.746	521.376	605.99	478.982	209.426	620.322	233.891	242.569	224.379	438.181	657.869	812.999	1332.5	718.145	485.967	372.485	217.993	203.757	388.835	292.599	290.615	510.563	581.923	520.604	530.558	633.415	597.761	459.003	328.283	231.031
1452318_a_at	Hspa1b	heat shock protein 1B	229.434	1896.11	482.204	409.515	1813.74	1793.41	533.581	1861.14	923.639	561.373	1423.43	1599.28	1368.8	788.618	980.209	968.991	654.838	428.781	182.083	364.61	369.517	486.664	1509.02	1723.81	952.372	577.027	333.854	897.54	544.373	531.637	475.819	332.303	348.986	541.235	1467.51	1812.53
1427127_x_at	Hspa1b	heat shock protein 1B	126.185	862.465	149.672	203.246	818.231	845.472	208.809	775.512	371.02	171.763	549.012	649.744	573.608	333.757	393.202	349.152	231.471	181.541	79.8155	129.591	146.02	192.6	619.007	693.677	497.963	235.911	141.603	351.019	253.92	186.574	143.176	138.409	123.651	227.627	635.204	768.647
1450971_at	Gadd45b	growth arrest and DNA-damage-inducible 45 beta	84.7259	108.135	101.653	77.454	522.449	249.964	72.8374	261.211	118.232	76.6278	102.88	91.0638	160.916	139.723	101.831	88.5576	79.429	77.4307	110.77	133.107	84.5429	99.755	153.923	209.251	141.584	180.917	174.371	80.3466	103.56	89.4244	86.6659	57.6719	92.1648	124.352	114.775	135.609
1416250_at	Btg2	B-cell translocation gene 2, anti-proliferative	317.196	300.169	325.807	447.415	2347.98	716.157	255.28	340.127	335.565	263.007	259.619	349.004	232.237	270.959	254.362	342.41	343.747	318.588	529.536	246.085	278.505	288.39	241.763	281.647	228.362	306.356	358.947	428.732	354.665	316.143	331.426	289.839	289.961	243.519	166.855	212.123
1434347_s_at	---	---	451.606	346.633	392.031	455.428	289.167	406.522	497.877	276.218	357.923	520.977	334.913	340.659	263.927	299.095	363.417	288.66	324.217	328.668	267.262	372.722	438.399	411.94	330.056	141.156	106.381	128.551	186.353	217.308	250.011	406.576	399.1	496.839	401.231	395.043	341.708	289.541
1418901_at	Cebpb	CCAAT/enhancer binding protein (C/EBP), beta	549.916	467.13	536.838	685.956	1243.53	1259.37	509.673	623.577	635.521	485.923	510.667	599.49	452.62	465.652	465.471	524.485	643.381	667.234	739.852	578.093	582.559	579.544	497.766	443.949	379.114	350.284	360.704	545.135	639.157	575.163	414.594	522.023	531.776	545.275	456.133	467.245
1448694_at	Jun	Jun oncogene	582.12	521.564	629.584	709.496	1966.67	1079.06	603.913	1359.41	760.378	592.995	585.267	697.171	629.849	605.257	691.351	706.866	737.575	827.551	673.333	756.583	749.751	957.212	616.306	518.614	503.16	537.563	520.159	598.6	771.018	701.434	736.819	663.054	698.664	770.511	751.97	669.162
1434246_at	L3mbtl3	l(3)mbt-like 3 (Drosophila)	209.119	246.355	159.135	168.508	224.875	170.722	202.736	223.785	202.276	182.244	236.282	196.181	237.62	165.101	159.766	177.994	141.686	87.5935	73.211	99.7551	119.791	142.216	175.022	112.447	208.171	154.923	118.915	154.784	132.888	146.535	150.451	94.2157	133.377	151.863	155.402	165.035
1454109_a_at	Jmjd6	jumonji domain containing 6	184.023	176.529	138.841	175.51	184.196	244.771	175.762	179.837	188.037	141.749	140.346	111.103	149.851	141.31	142.946	114.376	124.758	95.5366	94.249	137.123	112.095	133.113	136.107	143.854	111.811	123.285	121.242	117.315	118.096	119.019	118.935	108.851	113.79	115.379	136.89	143.284
1416756_at	Dnajb1	DnaJ (Hsp40) homolog, subfamily B, member 1	402.231	698.559	327.396	418.421	1498.81	667.402	442.612	663.124	467.104	389.243	428.318	324.611	542.943	521.787	447.989	340.769	329.94	240.283	356.963	295.301	292.884	343.628	627.608	761.93	350.343	615.211	495.241	377.097	319.468	270.336	310.143	291.651	309.034	362.733	602.023	577.42
1455872_at	Fam167a	family with sequence similarity 167, member A	128.808	80.5228	142.532	150.717	123.358	175.615	101.757	207.669	148.002	100.795	119.803	132.932	96.5051	98.5798	92.8514	139.785	187.686	145.238	207.649	163.129	138.899	143.236	87.2381	111.509	86.8627	97.3938	168.274	187.846	149.912	119.785	102.921	112.169	153.409	93.7	94.5279	92.7497
1452887_at	Traf3ip1	TNF receptor-associated factor 3 interacting protein 1	213.224	158.232	178.059	202.599	251.184	229.967	217.265	412.174	307.028	224.129	285.045	262.035	158.851	158.025	190.251	190.056	182.293	195.289	259.881	173.876	223.408	249.137	205.9	145.579	157.001	142.871	181.505	243.007	215.374	203.87	226.066	264.42	202.359	196.769	215.353	181.126
1449037_at	Crem	cAMP responsive element modulator	167.895	125.612	142.988	164.935	200	327.805	195.366	278.977	274.313	145.155	271.738	279.616	130.968	133.499	131.9	188.437	228.904	231.808	290.328	167.563	147.989	114.66	145.157	125.038	141.157	141.176	131.347	179.393	195.449	177.578	133.897	146.961	144.951	116.033	101.562	121.047
1417602_at	Per2	period homolog 2 (Drosophila)	1108.45	327.283	306.502	906.033	601.63	436.61	954.623	1166.48	479.599	1017.66	612.469	529.981	218.209	219.572	240.359	313.67	562.876	785.037	1667.62	1088.7	975.92	1057.01	664.849	438.639	315.537	231.918	233.882	323.508	458.634	620.259	632.562	1001.12	1033.72	849.799	744.306	312.032
1419389_at	Pde10a	phosphodiesterase 10A	303.811	249.562	224.952	437.262	238.858	220.989	328.758	264.043	408.072	402.998	416.316	552.89	196.597	263.25	257.557	255.316	372.566	385.609	478.127	269.048	333.468	261.592	233.397	265.968	311.976	140.657	215.932	269.114	239.965	299.936	352.975	324.56	204.53	194.51	159.923	230.113
1448830_at	Dusp1	dual specificity phosphatase 1	929.488	401.033	933.894	1001.31	2475.22	1695.03	664.236	724.096	1064.18	650.824	518.451	1221.8	463.846	484.247	636.956	1155.72	1205.38	1474.99	2158.01	1014.81	762.968	668.807	452.591	546.054	530.993	521.1	706.08	1450.99	1184.69	997.374	933.831	873.319	737.573	686.617	435.933	404.085
1458129_at	Rora	RAR-related orphan receptor alpha	643.721	308.928	372.305	634.646	330.123	320.695	596.368	852.966	572.445	458.722	575.139	707.741	180.686	338.603	263.759	477.973	636.324	750.748	1320.49	504.534	536.919	575.987	337.815	469.364	164.816	335.377	468.841	352.164	367.824	400.845	450.215	558.375	463.914	360.537	223.368	172.105
1429053_at	1110012J17Rik	RIKEN cDNA 1110012J17 gene	1325.96	713.347	825.299	1087.41	830.762	1312.83	1033.57	1401.83	1305.3	1038.57	881.766	1554.98	815.44	710.999	693.705	1046.63	1297.64	1493.9	1689.75	1140.09	986.729	874.227	691.16	584.448	583.763	655.77	675.477	1070.35	1162.5	1200.78	1162.49	981.133	948.242	735.445	711.687	723.328
1438774_s_at	Pgm2l1	phosphoglucomutase 2-like 1	1807.04	1442.99	1474.08	2248.16	1479.41	1614.94	2287.97	1453.78	1744.6	1792.76	1598.61	1855	1008.49	1360.29	1239.18	1262.79	1945.33	1755.41	1729.92	1604.94	1696.7	1763.96	1379.93	802.583	825.544	611.283	750.559	874.671	1257.19	1514.24	1559.29	1532.93	1624.2	1669.93	1386.58	1169.95
1418025_at	Bhlhe40	basic helix-loop-helix family, member e40	951.536	636.556	663.892	955.255	1163.77	1167.86	853.033	703.952	824.199	831.548	722.286	910.546	773.752	669.003	799.266	836.264	835.885	952.395	963.106	1010.9	863.527	772.543	763.763	523.84	556.784	454.76	471.037	648.388	876.046	994.834	1086.2	954.509	943.677	886.374	738.582	754.558
1437100_x_at	Pim3	proviral integration site 3	1107.6	878.714	946.331	1162.22	1878.29	1249.71	1101.38	986.379	1111.46	1123.9	968.994	1085.39	1054.76	1096.43	1141.44	1077.47	1029.22	1177.31	1023.46	1157.51	1235.59	1269.34	1124.82	936.267	699.704	930.528	904.465	940.98	1020.8	1134.09	1438.68	1248.66	1260.57	1383.51	1126.76	1076.14
1449100_at	Pard6a	par-6 (partitioning defective 6,) homolog alpha (C. elegans)	464.314	283.121	354.449	415.036	517.696	537.279	341.506	416.081	398.923	323.568	288.257	386.419	347.308	300.012	291.368	325.82	420.12	428.562	411.963	409.666	403.038	345.873	289.308	236.544	222.673	224.183	252.475	286.892	392.415	355.925	336.996	347.526	337.185	339.774	289.355	288.419

## Sheet: Suppl file 2C
Supplementary File 2C. Fold changes (ratio of light-exposed SCN to dark-control SCN) for light-modulated transcripts.
Probe Set ID	Gene Symbol	Gene Title	FC_CT6_1h	FC_CT6_2h	FC_CT6_4h	FC_CT16_1h	FC_CT16_2h	FC_CT16_4h	FC_CT22_1h	FC_CT22_2h	FC_CT22_4h
1428664_at	Vip	vasoactive intestinal polypeptide	0.783797	0.676273	0.928676	0.942494	0.454431	0.525459	0.951014	0.560741	0.801259
1423288_s_at	Cbln1 /// LOC100046314	cerebellin 1 precursor protein /// similar to precerebellin-1	0.894496	2.0222	1.49486	0.749622	32.0836	26.7477	1.3115	10.8965	1.15487
1423287_at	Cbln1 /// LOC100046314	cerebellin 1 precursor protein /// similar to precerebellin-1	0.884832	2.05388	1.35623	0.836499	30.5807	11.203	1.38713	5.89469	1.06305
1419491_at	Defb1	defensin beta 1	0.731336	2.66363	1.38956	0.626211	30.2769	27.1468	2.0571	11.9624	1.05991
1422562_at	Rrad	Ras-related associated with diabetes	1.12755	1.02351	0.784422	38.5911	20.9503	2.37954	16.8932	3.96246	1.12722
1437247_at	Fosl2 /// LOC634417	fos-like antigen 2 /// similar to fos-like antigen 2	1.21904	1.26132	1.01959	21.6432	20.6106	1.87839	8.48183	1.86039	1.01031
1429991_at	Fezf1	Fez family zinc finger 1	0.85617	2.60379	1.45716	0.99551	19.9713	14.4203	2.26815	10.907	1.25114
1423286_at	Cbln1 /// LOC100046314	cerebellin 1 precursor protein /// similar to precerebellin-1	0.844805	1.89779	1.51285	0.962741	18.162	10.3648	1.18773	5.41318	1.06768
1436387_at	C330006P03Rik	RIKEN cDNA C330006P03 gene	1.68345	1.45599	0.975739	11.0768	14.2355	5.24277	26.4023	6.44018	2.9818
1418610_at	Slc17a6	solute carrier family 17 (sodium-dependent inorganic phosphate cotransporter), member 6	1.59873	1.62319	0.935844	0.843273	14.1386	6.56749	1.04317	3.0733	0.950611
1436127_at	Crhbp	corticotropin releasing hormone binding protein	1.2847	1.77732	1.55895	1.6141	13.0485	13.238	1.7455	19.6252	1.18471
1419681_a_at	Prok2	prokineticin 2	0.716151	0.495102	0.578236	9.68248	12.9817	4.33728	4.62095	1.30984	1.65074
1436329_at	Egr3	early growth response 3	3.01123	1.27979	1.305	56.6535	12.9033	18.6955	36.788	9.30325	2.95205
1449571_at	Trhr	thyrotropin releasing hormone receptor	1.05267	1.37291	1.09953	1.33599	11.9014	7.01458	1.42848	2.55257	1.14272
1441778_at	Adcyap1	Adenylate cyclase activating polypeptide 1 (Adcyap1), mRNA	1.15442	0.918008	0.866498	0.94487	10.819	4.97771	1.07692	2.50914	0.665825
1455720_at	Adamts2	a disintegrin-like and metallopeptidase (reprolysin type) with thrombospondin type 1 motif, 2	0.93377	2.11034	1.20359	0.842726	10.4564	7.10764	1.47423	3.85146	1.24401
1452378_at	Malat1	metastasis associated lung adenocarcinoma transcript 1 (non-coding RNA)	1.23943	4.87039	3.07911	1.11107	10.32	2.01481	0.605711	3.05886	3.28016
1437268_at	Lancl3	LanC lantibiotic synthetase component C-like 3 (bacterial)	1.46409	1.19718	1.00878	1.03352	10.1672	3.66005	0.898968	3.0464	1.23148
1428379_at	Slc17a6	solute carrier family 17 (sodium-dependent inorganic phosphate cotransporter), member 6	0.95145	1.4281	1.18713	0.81308	9.79162	5.92675	1.36006	2.7135	0.928868
1425833_a_at	Hpca	hippocalcin	1.10354	3.15524	1.8969	1.02909	9.22426	2.73534	1.59611	3.37152	1.42689
1451680_at	Srxn1	sulfiredoxin 1 homolog (S. cerevisiae)	0.685605	1.12737	1.01479	2.64293	8.96902	4.03367	2.39111	2.53951	2.17624
1445669_at	Spry4	sprouty homolog 4 (Drosophila)	1.09855	1.15714	1.34627	2.33738	8.43174	2.81657	3.26294	1.70871	1.08688
1440413_at	A830006F12Rik	RIKEN cDNA A830006F12 gene	1.40083	1.7084	1.08442	1.37217	8.30494	4.81337	1.29928	2.11698	1.32848
1419021_at	Mcf2	mcf.2 transforming sequence	1.25935	1.72525	1.19206	1.00019	8.21187	3.82967	1.38805	2.51417	1.16715
1437029_at	Tacr3	tachykinin receptor 3	1.34032	1.36066	1.35381	0.991062	7.57772	8.44702	1.44481	5.81355	1.07138
1426318_at	Serpinb1b	serine (or cysteine) peptidase inhibitor, clade B, member 1b	0.769076	2.04205	0.997681	0.751128	7.4764	4.37937	1.09896	1.71345	1.00258
1452444_at	Napb	N-ethylmaleimide sensitive fusion protein attachment protein beta	0.967468	2.16416	1.64894	1.06902	7.43686	1.84171	1.20054	2.16735	1.44879
1417345_at	2900064A13Rik	RIKEN cDNA 2900064A13 gene	0.897087	1.70837	1.07716	1.26101	7.39625	1.47343	1.26058	1.99689	2.0473
1436141_at	---	---	1.06138	1.14613	1.05172	0.940058	7.15992	3.43837	1.67115	4.07041	1.10311
1417065_at	Egr1	early growth response 1	3.01537	2.38044	1.23694	45.6328	7.11849	3.15766	14.2733	4.78608	1.5041
1452479_at	Copg2as2	coatomer protein complex, subunit gamma 2, antisense 2	1.3476	3.01146	1.61055	0.96451	7.10815	2.15252	0.837361	2.70277	2.53199
1428393_at	Nrn1	neuritin 1	0.664443	2.10752	1.15663	0.972209	6.46158	4.70191	1.97519	1.90906	1.00398
1440346_at	Jmjd3	Jumonji domain containing 3, mRNA (cDNA clone IMAGE:1378940)	1.21374	1.91353	1.33279	2.04259	6.16588	0.943339	2.00033	0.821089	1.16296
1434877_at	Nptx1	neuronal pentraxin 1	0.909622	1.35404	1.18595	1.55792	5.97981	6.88182	1.88363	3.22038	1.31768
1441101_at	Hecw1	HECT, C2 and WW domain containing E3 ubiquitin protein ligase 1	1.10307	2.04971	1.63265	1.01155	5.82491	2.67155	1.38349	2.02338	1.74918
1426063_a_at	Gem	GTP binding protein (gene overexpressed in skeletal muscle)	1.99891	0.906358	0.652103	10.6305	5.69698	1.54621	4.32919	1.48499	0.95186
1421280_at	Gabra1	gamma-aminobutyric acid (GABA-A) receptor, subunit alpha 1	1.09147	2.69901	1.66203	1.25386	5.66785	4.83138	1.32783	2.8824	1.95278
1455034_at	Nr4a2	nuclear receptor subfamily 4, group A, member 2	2.10288	1.08198	1.01757	10.808	5.65367	1.20449	9.01133	2.34312	0.86757
1423652_at	Isca1	iron-sulfur cluster assembly 1 homolog (S. cerevisiae)	0.885018	2.73552	1.76192	1.11126	5.63588	1.31708	1.13979	1.8734	1.53044
1450370_a_at	Kcnip4	Kv channel interacting protein 4	0.930475	2.19357	2.21772	1.19014	5.59763	2.71214	1.25967	2.82611	1.74816
1451800_at	Gcc2	GRIP and coiled-coil domain containing 2	1.06357	2.73558	1.76749	0.847345	5.46844	2.14223	1.21809	2.20165	2.32341
1448553_at	Myh7	myosin, heavy polypeptide 7, cardiac muscle, beta	0.973936	1.17055	1.24537	1.1533	5.3718	2.66321	1.04432	2.6443	1.12299
1431191_a_at	Syt1	synaptotagmin I	1.572	2.81108	1.54432	1.17013	5.33677	2.34077	0.921703	3.4661	2.22872
1458129_at	Rora	RAR-related orphan receptor alpha	0.985901	1.18202	0.854361	1.06861	5.17527	1.7149	0.861376	1.62551	1.92413
1455123_at	St18	suppression of tumorigenicity 18	1.82424	0.919028	1.07459	0.842111	5.11382	2.59236	1.20126	2.41911	1.14581
1424658_at	Taok1	TAO kinase 1	1.68476	1.77388	1.08901	1.13962	5.03684	1.33859	0.62604	3.00663	1.51038
1458539_at	R3hdm1	R3H domain 1 (binds single-stranded nucleic acids)	1.16858	2.83267	1.46536	0.972272	5.01384	1.58039	1.2722	2.13877	2.49794
1439086_at	A930009L07Rik	RIKEN cDNA A930009L07 gene	0.805961	1.59593	1.64626	1.20714	4.97185	3.11146	1.06452	1.62715	1.47612
1423427_at	Adcyap1	adenylate cyclase activating polypeptide 1	0.871252	1.08315	1.10172	1.08063	4.89227	4.46441	1.26333	2.55786	0.848752
1432418_a_at	Ckmt1	creatine kinase, mitochondrial 1, ubiquitous	0.90528	1.8885	1.44877	1.07836	4.88657	1.91503	1.15255	2.37257	1.06686
1436461_at	---	---	1.37203	1.15982	1.20775	1.04266	4.8198	4.92382	1.19902	4.49499	1.17197
1416701_at	Rnd3	Rho family GTPase 3	1.21678	1.69827	1.45409	1.16824	4.8076	2.10773	1.40039	1.59769	1.23253
1456080_a_at	Serinc3	serine incorporator 3	0.95042	4.23624	1.94982	1.0228	4.67751	1.33061	1.33372	1.85866	1.05599
1436743_at	Cadm2	cell adhesion molecule 2	1.29989	1.02585	1.02908	1.02446	4.66504	1.96829	1.47234	1.64297	1.2716
1418322_at	Crem	cAMP responsive element modulator	1.50816	1.01531	0.91184	4.17392	4.58188	2.39071	4.60425	1.76208	2.05272
1456187_at	Slc7a14	solute carrier family 7 (cationic amino acid transporter, y+ system), member 14	0.929112	0.94696	0.860989	0.975035	4.4987	7.98282	0.931763	1.80023	2.11328
1437319_at	Unc13c	unc-13 homolog C (C. elegans)	1.33728	0.971313	0.893935	1.25419	4.48602	3.252	1.37434	1.66623	1.05575
1444286_at	---	---	0.973907	1.48163	1.10099	0.940688	4.45097	3.38685	1.0604	1.61835	1.12384
1421863_at	E130112N10Rik /// Vamp1	RIKEN cDNA E130112N10 gene /// vesicle-associated membrane protein 1	1.02825	1.97686	1.23209	1.12917	4.43531	3.97452	1.35839	4.35598	1.1763
1456764_at	Slc35f3	solute carrier family 35, member F3	1.14464	1.54567	1.12965	0.965785	4.34493	4.43641	1.18638	2.24504	1.18511
1427470_s_at	Napb	N-ethylmaleimide sensitive fusion protein attachment protein beta	1.02103	2.01193	1.42792	1.1218	4.33269	1.91687	1.06985	1.68528	1.29098
1443877_a_at	Rapgef6	Rap guanine nucleotide exchange factor (GEF) 6	1.96789	1.99447	0.796388	0.768027	4.25564	2.15793	0.825315	1.98989	1.533
1423100_at	Fos	FBJ osteosarcoma oncogene	2.37238	0.934113	0.772706	26.3028	4.24949	1.20666	3.95732	0.68575	0.997284
1421594_a_at	Sytl2	synaptotagmin-like 2	1.00577	1.17376	1.09093	0.934265	4.19676	3.49337	1.13944	4.03971	0.881421
1430511_at	Unc13c	unc-13 homolog C (C. elegans)	1.07678	1.63746	1.09635	0.782205	4.19619	2.45357	1.29738	2.02724	1.18474
1421990_at	Syt1	synaptotagmin I	1.1086	3.01617	1.83267	1.02241	4.18924	2.59197	1.17222	2.81569	2.3214
1457048_at	Qrfpr	pyroglutamylated RFamide peptide receptor	1.02243	1.4493	1.3786	1.07463	4.13709	4.68134	0.9786	2.97092	1.63877
1455197_at	Rnd1	Rho family GTPase 1	1.05826	1.51195	1.05875	0.980348	4.01237	3.42848	1.72682	1.99005	0.884561
1448459_at	Kcnip1	Kv channel-interacting protein 1	1.20685	1.39648	1.0213	1.04024	3.92085	4.76994	0.972565	1.66054	0.953644
1451236_at	Rerg	RAS-like, estrogen-regulated, growth-inhibitor	0.958598	1.17462	0.884781	0.933368	3.86768	3.81133	1.5656	1.84464	1.05427
1416785_at	Kcnip1	Kv channel-interacting protein 1	1.41554	1.40699	1.3233	1.25392	3.85235	2.82998	1.01331	1.67048	1.07965
1434672_at	Gpr22	G protein-coupled receptor 22	1.08642	1.2937	0.873904	0.963362	3.84674	5.2922	1.42176	2.94787	1.33061
1427482_a_at	Car8 /// LOC676792	carbonic anhydrase 8 /// similar to Carbonic anhydrase-related protein (CARP) (CA-VIII)	1.10559	0.844702	0.960385	1.00285	3.83411	2.83407	1.27956	1.86556	0.967381
1427189_at	Arih1	ariadne ubiquitin-conjugating enzyme E2 binding protein homolog 1 (Drosophila)	0.942917	2.71452	1.20946	1.93935	3.73025	1.77118	2.39099	1.7704	1.78813
1429772_at	Plxna2	plexin A2	1.05554	1.94055	1.34354	1.06962	3.71536	4.65477	1.3037	2.08846	1.31983
1417602_at	Per2	period homolog 2 (Drosophila)	0.817384	0.876845	1.04277	1.83826	3.6968	2.64088	1.4245	1.4825	1.15557
1434728_at	Gria3	glutamate receptor, ionotropic, AMPA3 (alpha 3)	1.4206	1.5767	1.08995	1.01037	3.65647	2.7255	1.4087	1.54834	1.03525
1429783_at	Pdlim5	PDZ and LIM domain 5	1.37515	1.25934	1.03656	1.09749	3.59663	2.36281	0.78443	2.11136	0.976051
1435307_at	Ankrd34b	ankyrin repeat domain 34B	1.02698	1.48896	1.15272	1.02927	3.59621	3.10501	1.15218	2.06843	1.21406
1419033_at	2610018G03Rik	RIKEN cDNA 2610018G03 gene	1.18747	1.55048	1.12107	1.12032	3.5858	4.20534	1.4044	2.04899	0.904136
1428834_at	Dusp4	dual specificity phosphatase 4	0.818334	0.711715	0.992305	11.9113	3.56978	1.33394	2.18924	0.773127	1.05964
1451840_at	Kcnip4	Kv channel interacting protein 4	0.986973	1.51506	1.22359	1.0786	3.52384	2.84387	1.10929	2.04761	1.31066
1426875_s_at	Srxn1	sulfiredoxin 1 homolog (S. cerevisiae)	0.774608	1.16601	1.03474	1.83291	3.52059	3.03033	1.60767	1.80733	1.89711
1439056_at	EG636791	predicted gene, EG636791	0.995602	1.39701	1.02818	0.966144	3.49409	3.48236	1.35875	2.77608	0.96338
1434967_at	Zswim6	zinc finger, SWIM domain containing 6	1.00411	1.47476	0.998996	0.937237	3.48455	1.33984	1.58137	1.86392	0.913379
1425206_a_at	Ube3a	Ubiquitin protein ligase E3A (Ube3a), transcript variant 2, mRNA	1.72202	2.90787	1.40736	1.05526	3.44171	1.27083	0.829327	1.25809	1.47646
1456307_s_at	Adcy7	adenylate cyclase 7	0.989363	1.46618	1.05547	0.960995	3.4393	2.59492	1.10381	1.82221	1.13251
1422052_at	Cdh8	cadherin 8	1.2531	1.52221	0.988795	1.00449	3.37317	3.71434	1.18043	1.58462	1.00681
1459723_at	Zdhhc22	zinc finger, DHHC-type containing 22	1.06255	1.08537	1.06839	1.00066	3.36672	2.88893	1.06358	1.59411	1.10343
1417406_at	Sertad1	SERTA domain containing 1	0.972805	0.765196	0.657804	4.28496	3.34352	1.11639	4.41199	1.50563	0.999211
1417920_at	Amn	amnionless	0.896318	1.31385	0.946499	0.924616	3.31178	2.66529	1.06097	3.58971	1.02136
1427822_a_at	Copg2as2	coatomer protein complex, subunit gamma 2, antisense 2	1.23652	2.04084	1.16745	0.988186	3.24632	2.72463	0.853886	2.37932	1.84111
1422520_at	Nefm	neurofilament, medium polypeptide	1.05109	1.79962	1.40515	1.20717	3.21934	4.02178	1.60725	2.33275	1.19599
1442143_at	Ano4	anoctamin 4	1.31074	1.09316	1.18446	1.12359	3.21004	2.90974	1.03406	4.24307	0.973122
1419748_at	Abcd2	ATP-binding cassette, sub-family D (ALD), member 2	1.19494	1.23119	0.933873	0.852755	3.18396	2.03776	0.939212	1.84384	1.55006
1426951_at	Crim1	cysteine rich transmembrane BMP regulator 1 (chordin like)	0.978309	1.54966	1.39456	1.13332	3.18161	3.01007	1.23287	2.00128	1.14121
1436931_at	Rfx4	regulatory factor X, 4 (influences HLA class II expression)	1.42229	1.30893	1.2381	0.990785	3.16491	1.92692	1.0191	1.98523	1.80233
1416041_at	Sgk1	serum/glucocorticoid regulated kinase 1	2.39213	1.88594	1.13701	1.6335	3.15406	1.33865	1.55743	1.86087	1.00129
1438531_at	A730054J21Rik	RIKEN cDNA A730054J21 gene	1.20832	1.06749	1.18225	1.08547	3.14792	3.19123	1.17225	1.50303	1.36712
1449130_at	Cd1d1	CD1d1 antigen	1.23451	1.32014	1.24968	1.10068	3.10587	1.85134	1.23529	1.44227	0.963099
1455960_at	Megf9	multiple EGF-like-domains 9	1.54373	2.21727	1.59124	0.829979	3.10479	1.38083	1.05837	2.13499	2.37627
1438782_at	Cntn4	contactin 4	1.19454	1.6318	1.0609	0.82136	3.10021	2.05847	1.67634	1.67153	1.14573
1452517_at	Plekhh1	pleckstrin homology domain containing, family H (with MyTH4 domain) member 1	1.68401	0.932389	1.00207	0.997969	3.08142	2.45363	0.757663	3.05927	1.2392
1433589_at	D6Wsu116e	DNA segment, Chr 6, Wayne State University 116, expressed	1.18003	1.95262	1.55096	0.735411	3.06549	1.1735	0.838308	1.67784	1.877
1455304_at	Unc13c	unc-13 homolog C (C. elegans)	1.02758	1.2955	1.07913	1.02638	3.06018	2.22089	1.25477	1.56119	1.10043
1422638_s_at	Rassf5	Ras association (RalGDS/AF-6) domain family member 5	0.934519	1.27997	1.13206	1.12047	3.00311	2.37324	1.22028	1.51296	1.17277
1418911_s_at	Acsl4	acyl-CoA synthetase long-chain family member 4	1.01094	2.12002	1.25809	0.99456	2.99232	1.5924	1.55955	1.07996	1.07269
1458813_at	Scn5a	sodium channel, voltage-gated, type V, alpha	0.975154	1.37859	1.07399	0.96765	2.98859	4.46895	1.10564	1.36239	1.13356
1428397_at	B3galt5	UDP-Gal:betaGlcNAc beta 1,3-galactosyltransferase, polypeptide 5	1.13637	1.46755	1.16592	0.978559	2.97712	2.65263	0.920775	3.72542	1.32965
1436985_at	Zfp644	zinc finger protein 644	0.89633	1.44016	1.35499	1.36112	2.96735	1.17739	0.96421	1.9656	2.11143
1416700_at	Rnd3	Rho family GTPase 3	1.0027	1.40981	1.14953	1.10891	2.94937	2.1507	1.3332	1.40102	1.21768
1445124_at	A930009L07Rik	RIKEN cDNA A930009L07 gene	0.985827	1.20713	0.998196	1.03721	2.9157	2.50942	1.05915	1.18544	0.975105
1420506_a_at	Stxbp1	syntaxin binding protein 1	1.24885	2.81725	1.50365	0.861757	2.89595	2.29023	0.833094	2.73627	2.15494
1460449_at	Anks1b	ankyrin repeat and sterile alpha motif domain containing 1B	1.13793	1.33322	1.25916	0.779986	2.88692	3.42462	1.45668	2.13179	1.09236
1421493_a_at	Rgs20	regulator of G-protein signaling 20	0.915269	0.710141	0.77759	0.824785	2.88269	2.57983	1.25655	1.48051	1.05708
1450121_at	Scn1a	sodium channel, voltage-gated, type I, alpha	0.983438	1.62484	1.18085	1.08446	2.87502	2.34292	1.26196	2.0292	1.05622
1417409_at	Jun	Jun oncogene	1.35855	1.04771	0.938933	3.34351	2.8731	1.20269	2.10168	1.28706	1.11936
1458534_at	Rgs7bp	regulator of G-protein signalling 7 binding protein	1.22084	2.23711	1.50781	1.04133	2.86378	2.10292	1.88746	2.56741	2.48657
1416301_a_at	Ebf1	early B-cell factor 1	0.559043	1.18802	1.02543	1.31999	2.8525	1.74822	1.49677	1.80953	0.875755
1423325_at	Pnn	pinin	1.03452	4.63813	2.79039	1.11641	2.85075	0.906405	0.94225	2.38399	3.35675
1438033_at	Tef	thyrotroph embryonic factor	1.20225	2.36854	1.7103	0.742192	2.85018	1.76073	0.814921	2.0621	1.84677
1457733_at	---	---	1.11768	1.13617	1.18339	1.00212	2.82652	4.62467	1.02383	1.86523	1.21344
1438628_x_at	Cntn3	contactin 3	1.04082	1.39815	1.27146	0.612247	2.79953	4.42299	1.19724	2.66575	1.20261
1418271_at	Bhlhe22	basic helix-loop-helix family, member e22	0.876108	1.27157	0.901487	0.777148	2.78796	3.19326	1.65387	1.34865	1.07713
1438007_at	Fam19a2	family with sequence similarity 19, member A2	0.728218	1.18657	1.08779	0.760361	2.76571	2.75849	1.14013	1.43828	0.849879
1419249_at	Pftk1	PFTAIRE protein kinase 1	1.06812	1.452	1.14831	1.02346	2.75161	2.46974	1.14333	1.558	1.18258
1435119_at	---	---	1.6139	1.08475	1.53838	1.31115	2.71624	1.5029	1.37568	5.53361	0.839618
1437079_at	Slc18a2	solute carrier family 18 (vesicular monoamine), member 2	1.54513	1.70677	1.42584	1.08069	2.71229	1.9339	0.828817	1.30298	1.03732
1437744_at	Slitrk4	SLIT and NTRK-like family, member 4	1.20156	1.49098	1.07169	0.885249	2.70369	2.45104	1.18535	1.77004	1.21629
1448694_at	Jun	Jun oncogene	1.21881	0.798211	0.790922	3.77072	2.70174	1.08874	1.71392	1.27026	0.904222
1449031_at	Cited1	Cbp/p300-interacting transactivator with Glu/Asp-rich carboxy-terminal domain 1	1.27942	0.794969	1.09591	1.02473	2.69909	3.49129	0.991786	1.99685	1.19578
1424842_a_at	Arhgap24	Rho GTPase activating protein 24	1.001	1.4386	0.953531	1.02911	2.69756	2.4125	1.22345	0.912559	0.932652
1455965_at	Adamts4	a disintegrin-like and metallopeptidase (reprolysin type) with thrombospondin type 1 motif, 4	1.38656	0.682536	0.850401	0.881917	2.67424	3.57217	1.00465	3.74261	0.938008
1436731_at	LOC100046959 /// Zfp385b	similar to zinc finger protein 533 /// zinc finger protein 385B	1.13811	1.4593	1.28355	0.932741	2.65218	4.04887	1.23236	2.25303	1.37066
1416783_at	Tac1	tachykinin 1	1.0446	1.01134	1.26281	0.914319	2.64149	5.2745	1.41296	5.177	0.959109
1452887_at	Traf3ip1	TNF receptor-associated factor 3 interacting protein 1	0.950168	1.24954	1.00323	1.58744	2.62529	1.99512	1.29152	1.26346	1.21665
1453571_at	Depdc6	DEP domain containing 6	1.4845	0.643127	1.01302	0.996305	2.61858	2.69407	1.21754	1.95519	1.50274
1459377_at	Akap2 /// Palm2 /// Palm2-akap2	A kinase (PRKA) anchor protein 2 /// paralemmin 2 /// Palm2-Akap2 protein	2.04655	1.26988	0.94631	0.991686	2.59956	2.76838	1.47163	2.61566	1.84777
1434347_s_at	---	---	1.00846	1.33579	1.18836	0.834217	2.5965	2.60528	1.03696	1.64707	1.36258
1452160_at	Tiparp	TCDD-inducible poly(ADP-ribose) polymerase	1.84899	1.09938	0.740937	4.18676	2.5932	1.1031	2.29766	1.20944	0.939759
1416029_at	Klf10	Kruppel-like factor 10	0.965041	0.880842	1.03052	3.99146	2.58488	1.17634	3.49354	1.17348	1.12028
1436023_at	Bclaf1	BCL2-associated transcription factor 1	0.781227	2.06645	1.75809	1.1029	2.56182	1.37238	0.919884	1.85378	2.20524
1417514_at	Ssx2ip	synovial sarcoma, X breakpoint 2 interacting protein	0.965704	2.40032	1.62575	1.12264	2.5582	1.28835	1.1837	1.45681	1.29961
1432558_a_at	Mal	myelin and lymphocyte protein, T-cell differentiation protein	1.91119	0.876799	0.890783	0.902097	2.54601	2.23699	0.831034	3.41798	1.16768
1439633_at	Syt7	synaptotagmin VII	1.1771	1.41768	1.16054	1.14042	2.52582	2.82143	1.63086	1.68579	1.28613
1417568_at	Ncald	neurocalcin delta	0.979823	1.42252	1.28516	1.04705	2.49178	1.93958	1.00336	1.75799	1.18453
1454768_at	Kcnf1	potassium voltage-gated channel, subfamily F, member 1	1.00491	1.46393	1.30186	1.2878	2.48312	3.61189	1.58492	1.4147	1.33293
1420161_at	AA409749	expressed sequence AA409749	1.09562	1.67444	1.10242	1.00336	2.48093	2.60933	1.23589	1.99249	0.966371
1433489_s_at	Fgfr2	fibroblast growth factor receptor 2	1.32263	1.28349	1.36285	1.18846	2.47694	2.04504	1.29321	1.53814	1.15165
1452762_at	8430436O14Rik	RIKEN cDNA 8430436O14 gene	1.0341	1.10694	0.943243	1.10266	2.46666	2.91802	1.02459	1.5164	1.01753
1452761_a_at	8430436O14Rik	RIKEN cDNA 8430436O14 gene	1.34347	0.954887	0.977592	1.01393	2.42707	2.86003	1.1397	1.32553	1.14186
1441890_x_at	LOC100045217 /// Tmeff1	similar to Transmembrane protein with EGF-like and two follistatin-like domains 1 /// transmembrane protein with EGF-like and two follistatin-like domains 1	1.30909	0.936425	0.989024	0.891496	2.42571	1.86635	1.68909	1.57277	1.04613
1438796_at	Nr4a3	nuclear receptor subfamily 4, group A, member 3	0.947523	0.773948	0.931548	8.44794	2.41531	0.740615	2.46115	0.649616	0.774817
1432813_at	2900064F13Rik	RIKEN cDNA 2900064F13 gene	1.26445	0.898976	1.07307	1.13294	2.41435	2.39103	1.20704	1.36252	1.14656
1429053_at	1110012J17Rik	RIKEN cDNA 1110012J17 gene	0.820094	0.906568	1.05254	1.1646	2.40138	1.34463	1.59074	1.21951	1.33763
1456509_at	1110032F04Rik	RIKEN cDNA 1110032F04 gene	0.899975	1.09013	0.977773	0.71303	2.39555	3.10736	1.32131	1.29591	1.00812
1455872_at	Fam167a	family with sequence similarity 167, member A	1.17009	0.623783	0.725669	1.53197	2.39077	1.23008	1.2321	0.787893	0.886737
1435297_at	Gjd2	gap junction protein, delta 2	1.06711	1.71888	1.2098	1.12325	2.38722	2.25605	1.33669	1.48385	1.00284
1441706_at	Dscaml1	Down syndrome cell adhesion molecule-like 1	1.17338	1.06799	1.03084	0.872607	2.3848	2.13454	1.13271	1.06538	1.34499
1436309_at	Neto2	neuropilin (NRP) and tolloid (TLL)-like 2	1.08661	1.49847	1.18384	1.15093	2.37468	2.84645	1.33686	1.95771	1.24897
1450723_at	Isl1	ISL1 transcription factor, LIM/homeodomain	1.36824	1.34783	1.1228	1.03133	2.35004	2.46632	0.877141	1.14599	0.921807
1457133_at	Tcerg1l	transcription elongation regulator 1-like	0.839701	1.40027	1.02762	0.973856	2.34721	3.43291	1.16716	1.50476	1.23397
1441891_x_at	Elovl7	ELOVL family member 7, elongation of long chain fatty acids (yeast)	1.652	0.986082	1.04854	0.877233	2.3463	1.34325	1.49046	1.75682	1.0283
1434111_at	LOC100048050 /// Lphn2	similar to calcium-independent alpha-latrotoxin receptor homolog 2 /// latrophilin 2	1.09691	1.32051	1.19928	1.06709	2.33842	2.41871	1.36072	2.14044	1.30755
1442659_at	Pcdh9	protocadherin 9	1.21988	1.4629	1.07209	1.1037	2.33494	1.55337	0.801574	1.9689	1.42418
1455267_at	Esrrg	estrogen-related receptor gamma	0.956614	1.5656	1.29431	1.02093	2.33261	2.1295	1.29701	2.10478	1.18174
1432432_a_at	LOC100044883 /// Rab3c	similar to RAB3C, member RAS oncogene family /// RAB3C, member RAS oncogene family	1.2687	1.69087	0.967962	0.915025	2.29687	2.20179	1.02608	2.3736	2.02583
1433883_at	Tpm4	tropomyosin 4	1.06692	1.06311	1.02644	1.66862	2.29653	1.67853	1.81604	1.575	1.26937
1422168_a_at	Bdnf	brain derived neurotrophic factor	0.860757	1.05576	1.36313	0.999958	2.28091	2.55657	2.03061	2.11772	0.991759
1434112_at	LOC100048050 /// Lphn2	similar to calcium-independent alpha-latrotoxin receptor homolog 2 /// latrophilin 2	1.24979	1.64774	1.32038	1.01363	2.27476	2.28439	1.29986	2.34808	1.52743
1442011_at	A230065H16Rik	RIKEN cDNA A230065H16 gene	1.04082	0.626189	0.859528	0.756579	2.26931	2.04964	1.4736	2.53014	0.954161
1428573_at	Chn2	chimerin (chimaerin) 2	1.05217	1.01481	1.05126	1.16634	2.24829	2.5011	1.29609	2.15552	1.05233
1425600_a_at	Plcb1	phospholipase C, beta 1	1.49966	1.86601	1.24266	1.09847	2.22661	1.70409	0.895618	2.22478	2.16519
1429786_a_at	Zwint	ZW10 interactor	0.915065	2.05024	1.92505	0.925661	2.21329	1.08777	1.18547	1.5364	1.14012
1417394_at	Klf4	Kruppel-like factor 4 (gut)	2.15695	1.48075	1.29698	10.8859	2.2015	0.809711	5.97464	1.40862	0.900392
1450249_s_at	Kif5a /// Kif5c	kinesin family member 5A /// kinesin family member 5C	1.12358	0.968082	0.796371	0.989511	2.19799	1.89587	1.16202	2.9527	1.394
1417051_at	Pcdh8	protocadherin 8	1.07041	1.30323	1.06604	1.07005	2.19628	2.53086	1.22552	1.98031	1.31736
1419639_at	Efnb2	ephrin B2	1.4526	1.06189	0.901972	1.17973	2.19454	2.75113	1.45451	1.77913	1.1019
1429158_at	Fbxo28	F-box protein 28	1.42749	1.35572	1.35479	1.1417	2.18792	1.6289	1.36574	1.47341	1.63923
1418472_at	Aspa	aspartoacylase	1.46588	0.724156	1.02246	0.907658	2.18097	2.10856	0.942009	2.69283	1.05442
1448557_at	Fam13c	family with sequence similarity 13, member C	1.09719	1.20861	1.09442	1.96977	2.17194	1.40544	1.86123	1.36754	0.989249
1419673_at	Spock1	sparc/osteonectin, cwcv and kazal-like domains proteoglycan 1	1.05547	1.83049	1.12597	1.00799	2.16475	2.32319	0.88889	1.80656	1.40321
1436578_at	Ermn	ermin, ERM-like protein	1.37728	0.832384	1.13663	0.977931	2.16202	2.49142	0.98225	3.72472	1.21646
1440966_at	39879	membrane-associated ring finger (C3HC4) 7	1.55882	1.27036	1.42054	0.905354	2.1466	0.298172	0.817545	0.808544	1.17584
1426606_at	Crtac1	cartilage acidic protein 1	0.940772	1.17375	1.09627	1.07723	2.14247	2.48005	1.00831	1.35609	0.866593
1460219_at	Mag	myelin-associated glycoprotein	1.34522	0.852014	1.06756	0.812017	2.14019	2.20192	0.91064	3.61382	1.04999
1448443_at	Serpini1	serine (or cysteine) peptidase inhibitor, clade I, member 1	0.97939	1.41248	1.19941	1.10654	2.13707	2.36481	1.30516	1.52947	1.05846
1431422_a_at	Dusp14	dual specificity phosphatase 14	0.935765	1.0476	1.08652	1.40311	2.13693	1.02577	1.68682	1.35447	1.00947
1455271_at	OTTMUSG00000014994	predicted gene, OTTMUSG00000014994	1.20662	1.20143	1.04309	2.67001	2.13544	0.841319	1.95797	2.04267	0.822129
1442077_at	2310076G05Rik	RIKEN cDNA 2310076G05 gene	1.43072	1.41593	1.00343	1.06486	2.12452	2.44091	1.44436	1.59595	1.12953
1427122_at	Copg2as2	coatomer protein complex, subunit gamma 2, antisense 2	1.25311	1.43097	1.20053	0.705714	2.12001	3.59546	1.30224	1.7882	1.04006
1443847_x_at	Aff2	AF4/FMR2 family, member 2 (Aff2), mRNA	1.13231	1.08737	0.940225	1.00993	2.11858	2.54275	1.06189	1.44177	1.14604
1428077_at	LOC100047091 /// Tmem163	hypothetical protein LOC100047091 /// transmembrane protein 163	1.07672	1.03213	1.0949	1.06842	2.11314	2.11497	1.02107	1.38008	0.895894
1421844_at	Il1rap	interleukin 1 receptor accessory protein	1.4214	0.955557	1.27624	1.14369	2.10236	3.29595	1.11194	2.47345	1.33578
1419414_at	Gng13	guanine nucleotide binding protein (G protein), gamma 13	1.14698	0.997316	0.849667	1.12141	2.07586	2.45455	1.58507	3.01575	1.05629
1435854_at	Opalin	oligodendrocytic myelin paranodal and inner loop protein	1.16788	0.853334	0.97097	1.04211	2.07384	1.67636	0.825034	5.87037	0.914258
1424270_at	Dclk1	doublecortin-like kinase 1	1.33281	1.42649	1.23152	2.03583	2.07148	1.04895	2.15749	1.22862	1.23382
1433992_at	Shroom2	shroom family member 2	1.05874	1.25309	1.13799	1.18559	2.06619	2.18374	1.10564	1.90719	1.07952
1415834_at	Dusp6	dual specificity phosphatase 6	1.34395	1.30197	0.961414	1.43321	2.05144	1.35117	2.01874	1.21811	0.970897
1438112_at	9430021M05Rik	RIKEN cDNA 9430021M05 gene	1.0973	0.813852	1.0039	0.953494	2.05077	3.45993	0.795962	2.37035	1.03153
1423271_at	Gjb2	gap junction protein, beta 2	1.11574	1.05899	1.01192	1.25049	2.03303	2.04319	1.55653	2.23696	1.84346
1449422_at	Cdh4	cadherin 4	1.33741	0.945245	0.887589	1.15197	2.03134	3.19413	1.01514	1.82962	1.33655
1437230_at	Kcna1	potassium voltage-gated channel, shaker-related subfamily, member 1	1.44733	1.45315	1.49663	1.06369	2.02854	4.38641	1.46544	2.97212	1.64546
1436465_at	Klhl1	kelch-like 1 (Drosophila)	1.04553	0.82465	1.0344	1.14953	2.02127	2.41481	1.21139	1.29614	0.990477
1444025_at	Kcnj3	potassium inwardly-rectifying channel, subfamily J, member 3	1.56845	1.24011	0.941176	0.810724	1.99698	2.8119	1.53814	1.68247	0.770501
1419250_a_at	Pftk1	PFTAIRE protein kinase 1	1.01183	2.59048	2.07642	0.933207	1.99264	2.23626	1.71334	2.98621	1.74811
1456785_at	Med14	mediator complex subunit 14	1.18775	1.18157	0.993323	0.852958	1.98612	2.25879	1.01186	1.48718	1.00292
1419647_a_at	Ier3	immediate early response 3	0.94628	1.39793	0.91751	1.38779	1.98546	1.81191	1.19693	2.10859	1.24697
1449037_at	Crem	cAMP responsive element modulator	0.982371	1.16592	0.980848	1.5922	1.97636	1.92482	2.29253	1.52912	1.43063
1450850_at	Ezr /// LOC100044177	ezrin /// hypothetical protein LOC100044177	1.04617	0.918639	0.961159	1.77596	1.97611	1.5693	1.39559	0.751136	1.13747
1438217_at	A2bp1	ataxin 2 binding protein 1	1.17417	1.3635	1.08535	1.06139	1.96954	3.57112	1.28713	2.04622	1.26587
1427606_at	Usp27x	ubiquitin specific peptidase 27, X chromosome	1.16784	1.52607	1.58266	2.15117	1.9586	1.11251	1.30588	1.74068	0.864749
1417954_at	Sst	somatostatin	1.38545	0.989923	1.05668	1.10156	1.95858	2.3481	0.793527	2.92691	1.58621
1452318_a_at	Hspa1b	heat shock protein 1B	1.78489	1.46343	1.51921	0.95656	1.95422	2.46683	3.7192	1.02908	2.93784
1426541_a_at	Endod1	endonuclease domain containing 1	1.16037	2.11277	1.43847	0.863672	1.93264	1.48552	1.1718	1.87275	1.63899
1427157_at	Ccdc85a	coiled-coil domain containing 85A	1.0746	2.12431	1.33326	0.882215	1.9269	1.7039	1.90659	1.55153	0.964386
1452388_at	Hspa1a	heat shock protein 1A	1.17198	1.00046	1.12902	0.900323	1.8936	2.0546	2.06127	1.13105	1.86081
1416756_at	Dnajb1	DnaJ (Hsp40) homolog, subfamily B, member 1	1.04025	1.49885	1.329	2.14558	1.89279	0.696213	2.03852	1.23868	1.0161
1416129_at	Errfi1	ERBB receptor feedback inhibitor 1	1.17892	1.14557	1.06567	2.13537	1.89152	0.967254	1.44489	1.21438	0.988951
1434800_at	Sv2b	synaptic vesicle glycoprotein 2 b	0.956776	1.37211	1.17086	1.03615	1.88601	3.36531	1.61944	2.33122	1.16458
1435396_at	Stxbp6	syntaxin binding protein 6 (amisyn)	1.08584	0.996662	1.11622	0.910397	1.8795	3.38469	1.31338	1.61493	1.04328
1438051_at	Ttc14	tetratricopeptide repeat domain 14	1.27437	3.11785	2.52267	1.02607	1.87842	1.19799	0.879411	1.7445	1.62379
1450174_at	Ptprt	protein tyrosine phosphatase, receptor type, T	1.08766	0.784986	0.964505	1.17081	1.87554	1.69356	1.2594	2.43059	1.3948
1449533_at	Tmem100	transmembrane protein 100	1.10522	1.16267	1.06678	1.10244	1.87302	1.84327	1.65959	1.70053	1.14216
1449100_at	Pard6a	par-6 (partitioning defective 6,) homolog alpha (C. elegans)	0.89387	0.833621	0.802824	1.82853	1.86857	1.28581	1.51582	1.3905	0.984719
1450971_at	Gadd45b	growth arrest and DNA-damage-inducible 45 beta	0.914172	0.547209	0.906379	4.83147	1.84492	0.56866	2.459	1.47152	0.879331
1436532_at	Dclk3	doublecortin-like kinase 3	0.975978	1.3972	1.25724	0.865292	1.84091	3.72666	1.19301	1.88217	1.06042
1434955_at	39873	membrane-associated ring finger (C3HC4) 1	1.06982	1.41604	1.13523	1.13056	1.81796	2.0786	1.25424	1.64889	0.990357
1460081_at	Syt7	synaptotagmin VII	1.05007	1.1158	0.958777	1.00406	1.81733	2.21009	1.26913	1.37181	1.02979
1449137_at	Pdha1	pyruvate dehydrogenase E1 alpha 1	0.913812	2.44842	1.68969	1.07073	1.80814	1.33172	1.26242	1.37241	1.54615
1457032_at	Ak5	adenylate kinase 5	0.995871	1.18494	1.06922	1.06937	1.8037	2.39604	1.11928	1.8427	1.23944
1445691_at	Chn1	chimerin (chimaerin) 1	0.955518	1.76338	1.15291	1.01673	1.80052	1.53559	1.08517	2.17687	1.34715
1452380_at	Epha7	Eph receptor A7	0.905793	1.78523	1.16627	1.08641	1.79564	1.91484	2.22294	1.90714	0.835848
1416505_at	Nr4a1	nuclear receptor subfamily 4, group A, member 1	1.74402	0.795713	0.816044	26.5173	1.79273	0.788656	2.32547	0.651782	0.840084
1449773_s_at	Gadd45b	growth arrest and DNA-damage-inducible 45 beta	1.51463	0.660156	0.911754	5.11101	1.78903	0.586765	2.91247	1.03451	1.03681
1426543_x_at	Endod1	endonuclease domain containing 1	0.95881	2.01917	1.48049	1.01225	1.78548	1.84129	1.09644	1.44448	1.8094
1449228_at	Sh3gl2	SH3-domain GRB2-like 2	1.1293	2.82032	1.68914	0.870473	1.77184	1.22279	1.18347	1.90319	1.16684
1455925_at	A730035I17Rik /// LOC100045224	RIKEN cDNA A730035I17 gene /// similar to PR domain containing 8	0.935702	0.992665	0.943528	0.873254	1.7698	1.55435	1.49385	1.7215	1.26032
1428622_at	Depdc6	DEP domain containing 6	1.05698	0.823693	1.16467	1.17589	1.76588	2.98481	1.12214	2.25817	1.3147
1438774_s_at	Pgm2l1	phosphoglucomutase 2-like 1	1.24412	1.42558	1.05662	1.02524	1.76099	2.61518	1.09556	1.99457	1.47551
1455785_at	Kcna1	potassium voltage-gated channel, shaker-related subfamily, member 1	1.2411	0.921586	1.11637	1.03225	1.76077	2.85169	1.21413	3.02056	1.06794
1417357_at	Emd	emerin	1.07173	0.896704	0.87809	2.39344	1.75001	1.5659	1.42162	1.32238	1.38815
1426721_s_at	Tiparp	TCDD-inducible poly(ADP-ribose) polymerase	1.47511	0.965878	0.71119	4.18623	1.74484	0.9508	2.32855	0.966208	0.741848
1442108_at	---	---	1.24552	1.80899	1.27319	0.72264	1.73751	0.864996	1.01051	1.84961	1.53803
1434298_at	Zeb2	zinc finger E-box binding homeobox 2	1.25568	0.940885	0.975269	0.758997	1.72868	1.77297	1.35575	1.48338	1.11348
1449188_at	Midn	midnolin	0.952535	0.952318	0.915003	3.16322	1.71976	0.897827	2.20997	1.33962	0.930581
1455166_at	Arl5b	ADP-ribosylation factor-like 5B	1.08976	0.924443	1.0455	2.80172	1.65836	0.951323	1.48201	0.991342	0.9342
1431465_s_at	Fyttd1	forty-two-three domain containing 1	0.907982	3.38098	1.67804	0.876993	1.64924	1.40624	1.15111	2.02294	2.0586
1452624_at	Lrrtm1	leucine rich repeat transmembrane neuronal 1	1.29368	1.21846	1.11782	0.792542	1.64665	2.51398	1.20111	2.34905	1.15174
1455933_at	---	---	1.48263	2.86717	1.91491	1.12493	1.64626	0.788743	0.965331	1.42641	1.23355
1418901_at	Cebpb	CCAAT/enhancer binding protein (C/EBP), beta	1.24738	0.881645	0.834119	2.66207	1.64483	1.45787	2.3459	1.16581	0.937938
1426960_a_at	Fa2h	fatty acid 2-hydroxylase	1.41559	0.752905	0.858879	1.05142	1.6426	1.99736	1.01398	2.65203	1.27498
1436761_s_at	Fam13c	family with sequence similarity 13, member C	1.20455	0.958355	1.17806	1.22082	1.6387	1.24685	1.7735	1.52177	0.95723
1454109_a_at	Jmjd6	jumonji domain containing 6	0.95374	1.28178	1.26454	1.04343	1.6084	1.13839	1.76297	1.60283	0.940782
1457743_at	---	---	1.03352	1.55759	1.36613	0.944145	1.56621	2.08328	1.51584	1.79987	1.06013
1437726_x_at	C1qb	complement component 1, q subcomponent, beta polypeptide	1.10719	0.665521	0.769253	0.824876	1.56159	1.53065	1.36429	1.21397	0.677974
1427127_x_at	Hspa1b	heat shock protein 1B	1.6107	1.61129	1.1763	0.948713	1.55737	2.3272	5.64882	1.05698	2.55886
1437047_at	Zfp664	zinc finger protein 664	0.869306	1.87565	1.25949	0.908719	1.54303	1.47419	1.0089	2.10737	1.17858
1429211_at	2900078E11Rik /// Cadm2	RIKEN cDNA 2900078E11 gene /// cell adhesion molecule 2	1.29829	0.948928	0.97801	0.921744	1.53908	1.60669	1.3728	1.51719	0.956964
1442886_at	---	---	2.34588	1.91686	1.34687	0.863268	1.50632	0.890068	0.709339	1.45883	1.00465
1416250_at	Btg2	B-cell translocation gene 2, anti-proliferative	1.41053	1.03737	0.944354	7.82218	1.48942	0.84744	2.1981	0.782691	0.984038
1453119_at	Otud1	OTU domain containing 1	1.0273	0.921925	0.822236	2.09541	1.48268	1.10984	1.97187	0.969958	0.984929
1455130_at	Spty2d1	SPT2, Suppressor of Ty, domain containing 1 (S. cerevisiae)	1.00615	1.11815	1.0121	2.31857	1.4685	1.00666	1.56669	1.16057	0.948546
1440534_at	ENSMUSG00000056615	predicted gene, ENSMUSG00000056615	1.99606	1.25309	1.06889	1.04683	1.46222	3.06615	3.78576	0.823484	0.812566
1437100_x_at	Pim3	proviral integration site 3	1.04931	0.951503	0.909608	2.13755	1.40971	1.04134	1.32058	1.18117	1.06327
1418599_at	Col11a1	collagen, type XI, alpha 1	1.12654	2.47161	1.95915	1.12899	1.38706	1.30561	0.983937	1.85594	1.42648
1428759_s_at	Ccdc49	coiled-coil domain containing 49	1.24616	0.974352	0.767886	4.25034	1.37082	1.09794	1.71948	1.01294	0.96767
1448830_at	Dusp1	dual specificity phosphatase 1	1.07727	0.654542	0.853016	6.17211	1.36366	0.994918	1.81502	0.733421	1.03133
1437059_at	Sox21	SRY-box containing gene 21	1.32739	0.988062	0.786699	1.07493	1.35145	2.64312	1.89291	1.42242	0.867077
1449851_at	Per1	period homolog 1 (Drosophila)	0.932551	0.800321	0.985627	4.42234	1.34087	0.715745	2.00828	1.18691	1.06599
1424474_a_at	Camkk2	calcium/calmodulin-dependent protein kinase kinase 2, beta	1.42661	1.08948	1.05996	1.31113	1.33159	1.3745	2.19759	0.968508	1.10749
1420876_a_at	40062	septin 6	1.00862	2.46252	2.05002	1.13921	1.273	1.07693	1.07408	1.62673	1.15641
1418025_at	Bhlhe40	basic helix-loop-helix family, member e40	1.00391	0.843834	0.962967	1.82822	1.26432	1.58828	1.75912	1.27115	1.03938
1431315_at	Hyls1	hydrolethalus syndrome 1	0.78702	1.09312	1.30298	0.814507	1.26283	0.666146	1.29809	0.741359	0.605353
1427126_at	Hspa1b	heat shock protein 1B	3.07051	2.08383	1.42674	1.09913	1.25825	3.20762	5.89396	0.879201	3.17489
1416166_a_at	Prdx4	peroxiredoxin 4	1.35753	0.654067	0.565875	0.572477	1.19803	0.986228	1.00058	0.695672	0.49932
1451069_at	Pim3	proviral integration site 3	1.10797	0.91499	0.900284	2.19357	1.15541	1.07862	1.25081	1.46951	0.924264
1430177_at	Ube2b	ubiquitin-conjugating enzyme E2B, RAD6 homology (S. cerevisiae)	1.40626	1.52523	1.86295	1.29422	1.148	0.703899	1.72425	1.05337	0.917646
1428936_at	Atp2b1	ATPase, Ca++ transporting, plasma membrane 1	1.0313	1.22523	1.12421	1.10917	1.14608	1.33541	1.2144	1.82178	1.7698
1455421_x_at	Fam131b	family with sequence similarity 131, member B	0.949457	1.56767	1.45457	0.809718	1.12695	2.26023	1.64457	2.03611	0.87293
1436876_at	Rgs7bp	regulator of G-protein signalling 7 binding protein	1.16714	1.03183	1.14389	1.14968	1.12581	1.81948	1.34404	1.89454	1.20879
1435128_at	Baiap2	brain-specific angiogenesis inhibitor 1-associated protein 2	0.840419	0.947906	1.10392	1.19961	1.07523	2.69752	1.2159	1.32886	1.49654
1434246_at	L3mbtl3	l(3)mbt-like 3 (Drosophila)	0.8058	2.03234	1.52135	0.91281	1.07501	1.52516	1.07281	1.30683	1.47628
1424475_at	Camkk2	calcium/calmodulin-dependent protein kinase kinase 2, beta	1.24791	1.02457	0.943796	1.05612	1.0736	1.4191	2.09166	1.37582	1.15798
1431355_s_at	Trpm7	transient receptor potential cation channel, subfamily M, member 7	1.47682	1.27455	1.12401	0.891067	1.02331	0.533998	0.599591	0.466314	1.16147
1448663_s_at	Mvd	mevalonate (diphospho) decarboxylase	0.862633	0.958126	0.656069	0.928015	0.947943	0.865922	0.890901	0.827836	0.503311
1419717_at	LOC100044162 /// Sema3e	hypothetical protein LOC100044162 /// sema domain, immunoglobulin domain (Ig), short basic domain, secreted, (semaphorin) 3E	0.806543	0.854858	0.819392	0.928374	0.947178	2.23916	0.940533	0.500068	1.12855
1423622_a_at	Ccnl1	cyclin L1	1.16281	1.18506	1.19349	2.41581	0.940249	0.621026	1.25199	0.909336	0.984559
1436202_at	Malat1	metastasis associated lung adenocarcinoma transcript 1 (non-coding RNA)	0.907056	2.74835	1.98295	2.03198	0.934304	0.878425	0.946925	0.806847	1.22345
1423853_at	6330527O06Rik	RIKEN cDNA 6330527O06 gene	1.34183	1.17513	0.889971	1.38016	0.926627	3.10845	3.31047	1.36164	0.997907
1456512_at	Pdzrn4	PDZ domain containing RING finger 4	0.834513	1.10212	1.02688	0.897838	0.910939	0.464783	1.02274	0.63407	0.627409
1456487_at	Adcy1	adenylate cyclase 1	1.25777	1.01668	1.00483	0.925182	0.909205	1.19422	2.75146	1.50246	1.08143
1455237_at	Usp36	ubiquitin specific peptidase 36	0.859335	1.04084	0.900364	2.168	0.888071	0.947316	1.05203	1.0087	0.922297
1416442_at	Ier2	immediate early response 2	0.871067	0.779763	0.923061	5.11184	0.861126	0.810166	1.38878	0.695878	0.972951
1450930_at	Hpca	hippocalcin	0.97632	1.6996	1.30156	1.13296	0.853889	2.28172	1.46963	2.44767	1.25236
1431896_at	Six6os1	Six6 opposite strand transcript 1	1.17591	1.30482	1.31121	0.738011	0.853116	0.471304	0.600142	0.598802	1.01913
1419389_at	Pde10a	phosphodiesterase 10A	1.43925	1.22193	1.2085	0.957109	0.846356	2.95979	0.98238	1.51636	2.30404
1436944_x_at	4933439C20Rik /// LOC236604 /// Pisd	RIKEN cDNA 4933439C20 gene /// phosphatidylserine decarboxylase pseudogene /// phosphatidylserine decarboxylase	1.24575	2.01814	3.06757	0.900234	0.824424	0.823309	1.02668	1.53618	2.28156
1443175_at	A830010M09Rik	RIKEN cDNA A830010M09 gene	1.86412	1.8745	1.49676	0.898048	0.810536	0.313211	0.782562	0.394342	0.933359
1442226_at	LOC100044162 /// Sema3e	hypothetical protein LOC100044162 /// sema domain, immunoglobulin domain (Ig), short basic domain, secreted, (semaphorin) 3E	0.636772	0.720632	0.847436	0.873092	0.779886	1.36627	0.918516	0.382097	0.869313
1453807_at	6330563C09Rik	RIKEN cDNA 6330563C09 gene	0.825843	0.650689	0.702657	1.19486	0.754297	0.520202	0.75754	0.572349	1.05556
1449109_at	Socs2	suppressor of cytokine signaling 2	0.91707	0.795677	0.71811	0.970482	0.747812	0.573383	1.14608	0.421189	1.064
1447623_s_at	Prkd1	protein kinase D1	0.911367	0.822775	0.882917	0.827691	0.743444	0.794281	0.955137	0.470334	0.911172
1457806_at	B830028B13Rik	CDNA clone MGC:189985 IMAGE:9088172	1.05908	2.03604	1.16099	0.597968	0.732489	0.572727	0.990392	0.474411	0.758075
1441989_at	Bnip2	BCL2/adenovirus E1B interacting protein 2	0.662706	0.62764	1.07972	1.23957	0.695118	0.559206	0.632343	0.536555	0.72099
1454015_a_at	Cdh13	cadherin 13	0.922507	0.992696	0.957265	0.87708	0.689906	0.54481	0.890951	1.3389	1.18427
1444746_at	---	---	1.13628	1.13075	1.39933	0.85292	0.67763	0.56396	0.540227	0.504539	0.976113
1425175_at	C1ql3	C1q-like 3	0.668222	0.749154	0.859047	1.14036	0.668878	0.728218	1.31372	0.45229	0.969036
1424863_a_at	Hipk2	homeodomain interacting protein kinase 2	1.24462	0.391293	0.605918	1.01438	0.660228	0.883286	0.80534	0.560328	1.13866
1450945_at	Prkca	protein kinase C, alpha	0.764453	1.00624	0.877724	0.846292	0.656875	0.572495	1.33402	0.519218	0.787584
1449740_s_at	Dsg2	desmoglein 2	1.01476	0.733324	0.876721	0.658015	0.655124	0.627197	0.665778	0.680822	0.852419
1447223_at	---	---	0.911152	0.658431	0.819744	0.877953	0.650054	0.774398	0.458479	0.766262	0.745812
1440455_at	Camk2n1	calcium/calmodulin-dependent protein kinase II inhibitor 1	0.920338	1.10303	1.08759	1.06485	0.649907	0.977246	2.93851	1.00257	0.974328
1440557_at	Ipw	Ipw mRNA, partial sequence	0.815952	1.04883	1.03289	1.01527	0.64152	0.452711	0.761831	0.465248	0.748114
1447100_s_at	5730508B09Rik	RIKEN cDNA 5730508B09 gene	0.644975	0.647137	0.797434	0.827431	0.635904	0.403351	0.98386	0.416788	0.57924
1456295_at	B230114P17Rik	RIKEN cDNA B230114P17 gene	1.19412	0.753378	1.16051	0.919288	0.63248	0.664399	1.00875	0.462586	0.529209
1419238_at	Abca7	ATP-binding cassette, sub-family A (ABC1), member 7	0.829528	1.02802	0.935592	0.795416	0.628117	0.415068	0.761896	0.451423	0.714538
1439161_at	Saps3	SAPS domain family, member 3	1.94327	1.37797	1.34637	1.29173	0.628053	0.36532	0.860641	0.63864	0.996141
1428948_at	5730414M22Rik	RIKEN cDNA 5730414M22 gene	1.14007	0.724009	1.35333	1.15428	0.619547	0.633294	1.43724	0.701878	0.618218
1447342_at	---	---	1.18358	0.909752	1.30204	0.663912	0.615386	0.53945	0.611448	0.371406	0.566594
1420649_at	Zfhx3	zinc finger homeobox 3	1.21741	0.466911	0.580413	1.03763	0.607272	0.526088	0.744411	0.552281	1.12437
1445576_at	Rsph10b2	radial spoke head 10 homolog B (Chlamydomonas)	0.935336	0.677579	1.10502	0.890649	0.601828	0.452294	0.554233	0.498422	0.786338
1445874_at	---	---	1.16526	1.53695	1.25493	3.25242	0.600972	0.15524	0.802007	0.285041	0.647802
1440037_at	Pbx1	pre B-cell leukemia transcription factor 1	1.82495	2.24015	1.349	0.929063	0.600587	0.355454	0.571577	0.461379	1.31702
1449542_at	Pbx1	pre B-cell leukemia transcription factor 1	0.874459	0.914413	0.739569	1.06889	0.598092	0.513653	1.32769	0.562734	0.513882
1443322_at	---	---	0.895267	0.703949	0.635905	0.864922	0.596467	0.523165	0.954856	0.483675	0.569608
1425983_x_at	Hipk2	homeodomain interacting protein kinase 2	1.24335	0.391606	0.661708	1.11956	0.594737	0.823971	0.848404	0.628699	1.09699
1455629_at	Drd1a	dopamine receptor D1A	0.781646	0.637503	0.851286	1.16255	0.591136	0.455827	0.768336	0.476534	0.752304
1434785_at	Cacng5	calcium channel, voltage-dependent, gamma subunit 5	0.811257	0.972701	0.957755	0.922023	0.589098	0.62352	0.770242	0.443237	0.731319
1421137_a_at	Pkib	protein kinase inhibitor beta, cAMP dependent, testis specific	0.752239	0.737523	0.946242	0.773105	0.587947	0.398894	1.00023	0.609705	0.732474
1429900_at	5330406M23Rik	RIKEN cDNA 5330406M23 gene	1.71226	1.3248	1.38563	1.73563	0.583712	0.241603	1.04676	0.447493	0.80034
1422673_at	Prkd1	protein kinase D1	0.776987	0.82097	0.880768	0.910896	0.582137	0.715718	0.973225	0.469679	1.08422
1439629_at	Nrxn3	neurexin III	1.10736	1.52271	0.639739	0.934819	0.574514	0.344778	0.80742	0.296235	1.18167
1429286_at	1190003M12Rik	RIKEN cDNA 1190003M12 gene	1.14625	0.584485	0.903545	1.09716	0.571751	0.334296	1.13077	0.608304	0.374879
1439008_at	Zfp319	zinc finger protein 319	0.878352	0.956569	0.9896	0.688155	0.570206	0.853022	0.799306	0.84494	0.750418
1450990_at	Gpc3	glypican 3	0.652295	0.782187	0.880581	1.21371	0.569217	0.442762	0.845021	0.406781	0.689752
1438698_at	Tmem132c	transmembrane protein 132C	0.980457	0.717022	1.17357	1.08819	0.566593	0.454657	0.78125	0.641561	0.863228
1442029_at	Kcnq1ot1	KCNQ1 overlapping transcript 1	1.36025	1.59721	1.44006	0.681006	0.556626	0.591833	0.859425	0.51502	0.998025
1440980_at	Kcnh8	potassium voltage-gated channel, subfamily H (eag-related), member 8	0.796582	0.767563	0.761435	0.882892	0.552173	0.726258	0.814708	0.350005	0.905708
1433768_at	Palld	palladin, cytoskeletal associated protein	0.754771	0.86957	1.02897	0.745385	0.54623	0.746244	0.779329	0.577556	0.839602
1449909_at	2010005H15Rik	RIKEN cDNA 2010005H15 gene	0.72756	0.496117	0.675517	0.905934	0.543872	0.84899	0.924413	0.40531	0.854189
1442561_at	---	---	1.77983	1.69541	1.5848	0.893073	0.538687	0.407072	0.611686	0.504534	0.787835
1440564_at	Prokr2	prokineticin receptor 2	0.790678	0.680445	0.761811	1.11003	0.533249	0.468	0.995152	0.38814	0.688639
1452714_at	Tanc1	tetratricopeptide repeat, ankyrin repeat and coiled-coil containing 1	1.00322	0.808052	0.876392	0.850001	0.529822	0.391746	0.932948	0.600728	0.807869
1443282_at	Prpf38a	PRP38 pre-mRNA processing factor 38 (yeast) domain containing A	0.9008	1.01026	0.969957	0.986125	0.524019	0.661391	0.601254	0.636312	0.818853
1434572_at	Hdac9	histone deacetylase 9	0.911629	0.799619	0.941223	0.92335	0.520814	0.400456	1.16553	0.627812	0.58494
1429909_at	2600010E01Rik	RIKEN cDNA 2600010E01 gene	0.827935	0.580201	0.901523	0.788799	0.520698	0.567253	0.849881	0.4705	0.619409
1423530_at	Stk32c	serine/threonine kinase 32C	0.89837	0.641697	0.65739	1.04218	0.517069	0.731454	0.857777	0.613105	0.717534
1429506_at	Nkd1	naked cuticle 1 homolog (Drosophila)	0.984329	1.45213	1.11768	1.33137	0.516041	0.41333	0.767712	0.71337	0.894641
1451021_a_at	Klf5	Kruppel-like factor 5	0.835882	0.414032	0.631863	1.58063	0.510412	0.582575	0.719134	0.853434	0.985452
1436066_at	Kalrn	kalirin, RhoGEF kinase	1.15199	0.935118	0.966825	1.17987	0.50972	0.902633	4.52706	0.913031	0.957107
1460036_at	Ap1s2	adaptor-related protein complex 1, sigma 2 subunit	0.838753	0.744196	0.925513	0.899073	0.508424	0.538393	1.02396	0.451466	0.766878
1435551_at	Fhod3	formin homology 2 domain containing 3	0.896532	0.77984	0.887671	0.93815	0.508054	0.48279	0.962735	0.62265	0.891091
1455604_at	Fzd5	frizzled homolog 5 (Drosophila)	0.935142	0.603586	0.753813	0.890958	0.506137	0.456875	0.636686	0.281055	0.442686
1460092_at	---	---	1.4938	2.14176	1.28934	0.844252	0.502301	0.35006	0.686873	0.382025	0.694936
1431300_at	Sgip1	SH3-domain GRB2-like (endophilin) interacting protein 1	1.51427	1.6816	1.29438	0.959085	0.492499	0.290202	0.881665	0.495479	0.57807
1451440_at	Chodl	chondrolectin	0.666499	0.630185	0.806669	0.919501	0.488154	0.658263	0.765982	0.635639	0.893971
1424701_at	Pcdh20	protocadherin 20	0.935638	0.992932	1.01197	0.995144	0.487183	0.542015	1.05388	0.543625	0.827306
1452968_at	Cthrc1	collagen triple helix repeat containing 1	0.898063	0.895836	0.901161	1.05672	0.483475	0.454074	1.09198	0.776499	0.774276
1434295_at	Rasgrp1	RAS guanyl releasing protein 1	0.879958	0.715325	0.839393	0.975559	0.482914	0.472554	0.963495	0.454625	0.527772
1421943_at	Tgfa	transforming growth factor alpha	0.756826	0.683429	0.870928	0.914978	0.480188	0.526739	0.769047	0.467267	0.800135
1452682_at	Fam122b	family with sequence similarity 122, member B	0.823114	0.698614	0.896264	0.987977	0.477823	0.490185	0.802248	0.484495	0.709088
1446771_at	Tuba8	tubulin, alpha 8	0.960365	0.941587	0.971699	0.892043	0.476481	0.634878	1.11213	0.452502	0.70144
1428647_at	LOC676870 /// Pbx1	region containing RIKEN cDNA 2310056B04 gene; pre B-cell leukemia transcription factor 1 /// pre B-cell leukemia transcription factor 1	0.94807	0.813151	0.9249	1.07599	0.473627	0.503162	0.866949	0.57501	0.906182
1416008_at	Satb1	special AT-rich sequence binding protein 1	1.03596	0.701504	0.97343	0.859159	0.469775	0.474833	0.967233	0.580164	0.781635
1419518_at	Tuba8	tubulin, alpha 8	0.68882	0.609584	0.851878	0.880172	0.468347	0.618443	0.746582	0.671565	0.744716
1426834_s_at	D930015E06Rik	RIKEN cDNA D930015E06 gene	0.989866	1.96702	1.07054	1.06796	0.467447	0.843061	0.864951	0.538	0.694884
1437263_at	A730089K16Rik	RIKEN cDNA A730089K16 gene	0.728169	0.695773	0.885056	0.627572	0.464579	0.517799	0.714037	0.611603	0.666426
1435972_at	Cast	calpastatin	0.915673	0.638362	0.845023	0.845498	0.464042	0.53861	0.851767	0.544417	0.88987
1416630_at	Id3	inhibitor of DNA binding 3	0.798346	0.581312	1.06616	0.549874	0.463505	0.667893	0.677508	0.660608	1.25228
1443882_at	---	---	0.904696	0.497462	1.06613	0.858193	0.46177	0.742806	0.912493	0.372972	1.04266
1438407_at	Dsel	dermatan sulfate epimerase-like	0.954725	0.828407	0.906233	0.935669	0.461393	0.448098	0.761652	0.486949	0.630198
1439278_at	Zbtb20	zinc finger and BTB domain containing 20	1.28926	0.335156	0.442203	1.10444	0.461227	0.50124	0.54878	0.423484	0.82613
1426858_at	Inhbb /// LOC100046802	inhibin beta-B /// similar to Inhbb protein	1.07815	1.10202	0.726059	0.831908	0.45942	0.682503	1.24562	0.463029	0.709501
1454795_at	Cobll1	Cobl-like 1	0.866639	0.920939	1.1319	0.816497	0.458899	0.457932	0.984897	0.464368	0.665857
1424007_at	Gdf10	growth differentiation factor 10	1.15186	0.918674	1.02209	0.617849	0.458217	0.368537	1.11974	0.265056	0.556978
1435285_at	Mpped2	metallophosphoesterase domain containing 2	0.940097	0.612191	0.802735	0.92823	0.458192	0.474861	0.851117	0.625886	0.713304
1435092_at	Arl4a	ADP-ribosylation factor-like 4A	0.788813	0.795837	0.949335	0.692769	0.457649	0.620204	0.71092	0.596002	0.790566
1454220_at	9330185C12Rik	RIKEN cDNA 9330185C12 gene	0.680302	0.690198	0.926964	0.857449	0.451091	0.327214	0.650745	0.367605	0.560575
1423312_at	Tpbg	trophoblast glycoprotein	0.892048	0.608408	0.800809	0.894582	0.450602	0.439162	1.0138	0.51292	0.676776
1455993_at	Odz4	odd Oz/ten-m homolog 4 (Drosophila)	1.06235	0.4455	0.654249	1.25756	0.45021	0.825997	0.795843	0.773681	0.88624
1426546_at	Tesk2	testis-specific kinase 2	0.804959	0.844543	1.1258	0.951163	0.44979	0.582942	0.681398	0.429619	0.721307
1452834_at	2600010E01Rik	RIKEN cDNA 2600010E01 gene	0.943858	0.575742	0.828984	1.02209	0.447538	0.383487	0.761503	0.388899	0.78551
1446571_at	---	---	1.05954	0.986226	1.02386	0.755045	0.447106	0.258775	0.639029	0.31975	0.74455
1421354_at	Prkg2	protein kinase, cGMP-dependent, type II	0.660925	0.717831	1.10499	0.950448	0.446135	0.33264	0.825329	0.517275	0.728086
1429678_at	5730508B09Rik	RIKEN cDNA 5730508B09 gene	0.890595	0.902442	0.913574	0.830105	0.445743	0.610366	0.902126	0.379635	0.541482
1452462_a_at	Banp	BTG3 associated nuclear protein	1.23809	1.45878	0.661651	0.805106	0.443849	0.57229	1.39133	0.620101	0.646289
1435730_at	D930026N18Rik	RIKEN cDNA D930026N18 gene	1.15332	0.634791	0.770283	0.93504	0.441449	0.442987	0.837506	0.688337	0.884042
1457781_at	Kcnq1ot1	KCNQ1 overlapping transcript 1	1.40962	1.0865	0.763968	0.992839	0.440539	0.37464	0.739625	0.470898	0.923106
1458176_at	Per3	Period homolog 3 (Drosophila) (Per3), mRNA	0.928038	1.07135	1.06606	0.963766	0.438804	0.582009	0.581971	0.469305	0.921404
1460043_at	---	---	0.821781	0.763909	0.98597	1.05343	0.437804	0.511188	0.819262	0.469985	0.860408
1426719_at	Apbb2	amyloid beta (A4) precursor protein-binding, family B, member 2	0.916905	0.753856	0.852963	1.14619	0.436214	0.560672	0.781335	0.628227	0.80447
1428646_at	LOC676870 /// Pbx1	region containing RIKEN cDNA 2310056B04 gene; pre B-cell leukemia transcription factor 1 /// pre B-cell leukemia transcription factor 1	0.927715	0.89932	0.966846	1.02931	0.435416	0.404051	0.827437	0.645355	0.924264
1426060_at	---	---	1.02839	0.709337	0.827975	1.03672	0.435261	0.394117	1.02314	0.378971	1.05277
1442823_at	Shank2	SH3/ankyrin domain gene 2 (Shank2), transcript variant 2, mRNA	1.23026	0.870068	0.7778	1.12831	0.434359	0.435796	0.86746	0.593226	0.995956
1442368_at	Kctd12b	potassium channel tetramerisation domain containing 12b	0.927287	0.753176	0.734878	1.13748	0.433949	0.378639	1.07186	0.644959	1.26541
1437291_at	2700081O15Rik	RIKEN cDNA 2700081O15 gene	1.06337	1.13478	0.852083	0.882637	0.433704	0.620104	0.970946	0.649466	0.654542
1427195_at	---	---	0.60011	0.853354	0.901567	0.950541	0.432272	0.578694	0.677831	0.613511	1.03094
1417757_at	Unc13b	unc-13 homolog B (C. elegans)	0.908809	1.012	0.929906	1.17186	0.432223	0.400452	0.97567	0.592476	0.886672
1437934_at	Tia1	cytotoxic granule-associated RNA binding protein 1	1.22568	0.750952	1.12292	0.542138	0.431963	0.564166	0.639712	0.499445	0.897546
1435460_at	Prkg2	protein kinase, cGMP-dependent, type II	0.745147	0.628451	0.739826	1.02832	0.431089	0.340895	0.783181	0.34223	0.892474
1426061_x_at	---	---	1.12921	0.692625	0.821623	1.12644	0.422381	0.421396	0.898817	0.393804	0.889859
1417155_at	Mycn	v-myc myelocytomatosis viral related oncogene, neuroblastoma derived (avian)	1.08672	0.812789	0.649878	0.798603	0.42188	0.5018	1.23175	0.370936	0.616716
1431146_a_at	Cpne8	copine VIII	1.06904	1.06354	1.03007	0.932627	0.421687	0.566546	0.672814	0.621036	0.573659
1457686_at	Sfrs17b	splicing factor, arginine/serine-rich 17b	0.80698	0.806299	0.925683	0.935758	0.420976	0.384102	0.837763	0.495047	0.829773
1418349_at	Hbegf	heparin-binding EGF-like growth factor	0.861802	0.696547	0.830084	0.795403	0.420863	0.365503	0.957163	0.530751	0.510253
1419473_a_at	Cck	cholecystokinin	0.463923	0.833708	0.771354	0.737361	0.420707	0.387062	1.28708	0.330808	0.498999
1439766_x_at	Vegfc	vascular endothelial growth factor C	0.807575	0.850278	0.758756	0.972243	0.418694	0.542605	1.08077	0.499818	0.599015
1435192_at	Sox3	SRY-box containing gene 3	0.611543	0.526459	0.61417	0.862973	0.418202	0.64335	1.20175	0.700058	1.00455
1451469_at	Cntln	centlein, centrosomal protein	0.893135	1.0343	1.13431	1.03103	0.413871	0.402417	0.831353	0.628012	0.734214
1429625_at	2900054C01Rik	RIKEN cDNA 2900054C01 gene	1.02494	0.752817	0.877723	0.986116	0.41377	0.494125	0.956503	0.481308	0.801901
1435175_at	BC034090	cDNA sequence BC034090	0.912852	0.861197	0.763035	0.922665	0.410633	0.35524	0.749493	0.501709	0.910499
1447927_at	EG634650 /// Gbp10 /// Mpa2l	predicted gene, EG634650 /// guanylate-binding protein 10 /// macrophage activation 2 like	0.645727	0.839828	0.983377	0.846378	0.406963	0.351591	0.723052	0.466638	0.667977
1416981_at	Foxo1	forkhead box O1	1.30729	0.415131	0.585201	1.13398	0.406092	0.560715	0.934094	0.844972	0.937633
1419358_at	Sorcs2	sortilin-related VPS10 domain containing receptor 2	0.887036	0.789479	0.839724	0.981791	0.405205	0.487431	0.876859	0.655551	0.790931
1421391_at	Vipr2	vasoactive intestinal peptide receptor 2	0.48344	1.06343	1.149	0.928735	0.404864	0.260256	0.775555	0.325167	0.560579
1436566_at	Rab40b	Rab40b, member RAS oncogene family	0.999138	0.885037	0.884299	0.687444	0.404304	0.540665	0.912951	0.613603	0.824222
1445537_at	---	---	1.01478	1.40367	1.11444	0.93543	0.40365	0.336516	0.725529	0.415279	0.888405
1424383_at	Tmem51	transmembrane protein 51	0.634417	0.734402	0.727869	0.857767	0.402406	0.347405	0.661024	0.407266	0.624906
1435162_at	Prkg2	protein kinase, cGMP-dependent, type II	0.809911	0.650546	0.817121	0.901694	0.398565	0.339507	0.805087	0.503754	0.753277
1449240_at	Gsbs	G substrate	0.685567	0.64088	0.861193	0.955999	0.396227	0.371841	0.718694	0.48848	0.687238
1445804_at	---	---	1.44341	1.41654	1.42505	0.685749	0.393846	0.29797	0.985915	0.401268	0.727955
1428837_at	Klhl14	kelch-like 14 (Drosophila)	0.75717	0.73221	0.951282	0.687968	0.391383	0.496534	0.872515	0.470284	0.626522
1431751_a_at	Mpped2	metallophosphoesterase domain containing 2	0.893033	0.585815	0.66123	0.888293	0.390546	0.47743	0.786795	0.690373	0.71789
1422605_at	Ppp1r1a	protein phosphatase 1, regulatory (inhibitor) subunit 1A	0.69642	0.557562	0.777311	0.944315	0.388496	0.375447	0.84876	0.6834	0.865445
1449474_a_at	Nelf	nasal embryonic LHRH factor	0.783064	0.782642	0.795398	0.840033	0.388047	0.332313	0.850221	0.427341	0.88348
1424415_s_at	Spon1	spondin 1, (f-spondin) extracellular matrix protein	0.757492	0.638326	0.647025	0.952964	0.380603	0.424225	0.852983	0.596951	0.716587
1427523_at	E130112M24Rik /// Six3	RIKEN cDNA E130112M24 gene /// sine oculis-related homeobox 3 homolog (Drosophila)	0.932394	0.595498	0.827424	1.16847	0.377425	0.432233	0.864399	0.668611	0.999532
1428891_at	9130213B05Rik	RIKEN cDNA 9130213B05 gene	0.861178	0.701332	0.855323	1.06683	0.370282	0.40542	0.81179	0.54447	0.820979
1425296_a_at	Rgs3	regulator of G-protein signaling 3	0.953625	0.883564	0.970237	0.677814	0.368232	0.710469	0.589886	0.975075	0.995182
1421138_a_at	Pkib	protein kinase inhibitor beta, cAMP dependent, testis specific	0.743881	1.10309	1.26543	0.929648	0.367634	0.335955	0.888351	0.582022	0.802963
1419457_at	Rgnef	Rho-guanine nucleotide exchange factor	0.995878	0.701718	0.768527	0.983126	0.36608	0.361273	0.931366	0.517319	0.719419
1452287_at	---	---	0.8836	0.760912	0.803071	0.87185	0.363668	0.586436	0.883641	0.724993	0.829981
1457212_at	---	---	1.66316	1.20364	0.991259	0.792154	0.36102	0.361632	0.648794	0.463016	1.20421
1432189_a_at	Sox5	SRY-box containing gene 5	1.10828	0.531424	0.745868	1.07732	0.358236	0.448025	0.791899	0.821335	1.10369
1426734_at	Fam43a	family with sequence similarity 43, member A	0.731029	0.731045	0.805569	0.660534	0.357996	0.463243	0.690356	0.363213	0.626697
1452717_at	Slc25a24	solute carrier family 25 (mitochondrial carrier, phosphate carrier), member 24	0.677091	0.869507	0.838762	0.908573	0.357579	0.498187	0.950913	0.420437	0.680818
1430143_at	4930426D05Rik	RIKEN cDNA 4930426D05 gene	0.518581	1.22914	1.32718	0.898084	0.34885	0.350712	0.844131	0.405338	0.868852
1424609_a_at	100039204 /// 100040620 /// 100040790 /// 100041416 /// 100042151 /// 100043211 /// 100043316 /// Cwc22 /// LOC100046838 /// LOC100047648 /// OTTMUSG00000017752	predicted gene, 100039204 /// predicted gene, 100040620 /// predicted gene, 100040790 /// predicted gene, 100041416 /// predicted gene, 100042151 /// predicted gene, 100043211 /// predicted gene, 100043316 /// CWC22 spliceosome-associated protein homolog	1.15468	0.866024	0.862849	1.05365	0.347955	0.495001	0.735768	0.461867	1.14329
1452514_a_at	Kit	kit oncogene	0.921582	0.867532	0.824979	0.939007	0.345218	0.47351	0.856921	0.781081	0.952376
1423619_at	Rasd1	RAS, dexamethasone-induced 1	0.703366	0.650719	0.898143	0.732658	0.342499	0.684089	0.66604	0.347826	0.613235
1426851_a_at	Nov	nephroblastoma overexpressed gene	1.03763	0.721922	0.90608	0.866558	0.342036	0.410356	1.1117	0.338387	0.636143
1424608_a_at	100039204 /// 100039345 /// 100040790 /// 100041175 /// 100041416 /// 100042151 /// 100042787 /// 100043211 /// 100043258 /// 100043316 /// 434166 /// Bzw2 /// OTTMUSG00000017752	predicted gene, 100039204 /// predicted gene, 100039345 /// predicted gene, 100040790 /// predicted gene, 100041175 /// predicted gene, 100041416 /// predicted gene, 100042151 /// predicted gene, 100042787 /// predicted gene, 100043211 /// predicted gene,	1.2597	0.772297	0.667152	1.30215	0.341054	0.440135	0.818422	0.438556	0.878716
1423310_at	Tpbg	trophoblast glycoprotein	0.985212	0.622963	0.819277	0.817134	0.340132	0.396904	0.893942	0.565237	0.821019
1422955_at	Syt17	synaptotagmin XVII	0.812648	0.735351	0.792813	0.914908	0.339879	0.237603	0.864542	0.488603	0.495621
1447096_at	---	---	1.70649	1.17665	1.34792	0.72923	0.339481	0.249734	0.57452	0.372039	0.806246
1419517_at	Cnih3	cornichon homolog 3 (Drosophila)	1.01088	0.54588	0.758225	1.04776	0.338522	0.413842	0.810575	0.844181	0.734136
1440728_at	---	---	1.06335	1.03766	0.997395	0.805423	0.33611	0.21761	0.72944	0.499379	0.649159
1419417_at	Vegfc	vascular endothelial growth factor C	1.0263	0.910825	0.917253	1.05581	0.334055	0.427018	0.800233	0.510991	0.582349
1426852_x_at	Nov	nephroblastoma overexpressed gene	0.930151	0.70601	0.777255	1.06025	0.333977	0.370034	1.06588	0.315903	0.648652
1424607_a_at	100039204 /// 100040620 /// 100040790 /// 100041416 /// 100042151 /// 100043211 /// 100043316 /// Cwc22 /// LOC100047648 /// OTTMUSG00000017752	predicted gene, 100039204 /// predicted gene, 100040620 /// predicted gene, 100040790 /// predicted gene, 100041416 /// predicted gene, 100042151 /// predicted gene, 100043211 /// predicted gene, 100043316 /// CWC22 spliceosome-associated protein homolog	1.25681	0.933448	0.803529	1.01782	0.333291	0.462497	0.764318	0.477113	1.18298
1420760_s_at	Ndrg1	N-myc downstream regulated gene 1	0.882932	0.703212	0.886686	0.929499	0.333021	0.429122	0.884799	0.612542	0.889429
1457265_at	Sfrs17b	splicing factor, arginine/serine-rich 17b	0.778821	0.898689	0.971846	0.88019	0.332672	0.385192	0.810065	0.442156	0.763018
1435283_s_at	Gm967	gene model 967, (NCBI)	0.893675	0.707495	0.882629	0.932875	0.329727	0.51271	0.665997	0.469212	0.682332
1444198_at	---	---	1.00927	1.24558	1.28354	1.24551	0.327318	0.281232	0.484491	0.412648	0.838785
1441161_at	B230216G23Rik	RIKEN cDNA B230216G23 gene	0.585467	0.581946	0.91917	0.816925	0.323324	0.376455	0.843661	0.319696	0.80322
1456333_a_at	Arhgap6	Rho GTPase activating protein 6	1.02728	1.04394	0.978664	0.776319	0.322748	0.478535	0.71489	0.881958	1.23804
1434064_at	Orai3	ORAI calcium release-activated calcium modulator 3	0.9011	0.80501	0.772341	0.857335	0.321455	0.630056	0.904915	0.690054	0.703813
1420650_at	Zfhx3	zinc finger homeobox 3	1.01626	0.351124	0.453533	0.989802	0.319968	0.51429	0.665513	0.603519	0.807151
1442613_at	---	---	0.745588	0.693344	0.604751	1.4095	0.319532	0.311807	0.641585	0.37421	0.66451
1423413_at	Ndrg1	N-myc downstream regulated gene 1	0.952154	0.651996	0.865028	0.868867	0.318479	0.529656	0.776847	0.943317	0.97049
1424062_at	Ube2d1	ubiquitin-conjugating enzyme E2D 1, UBC4/5 homolog (yeast)	1.06036	0.855301	0.900631	0.836935	0.318453	0.612197	0.81004	0.709965	0.753292
1460101_at	---	---	1.2194	1.39991	1.1706	1.05818	0.318277	0.189181	0.618961	0.315582	0.805153
1418257_at	Slc12a7	solute carrier family 12, member 7	0.591465	0.536673	0.799003	0.996847	0.318186	0.43915	0.763215	0.367893	0.817096
1428221_at	Klhdc8b	kelch domain containing 8B	0.780372	0.851918	0.947739	0.654051	0.314013	0.477774	0.758433	0.56654	0.619829
1439232_at	---	---	0.834393	0.580136	0.695275	0.789901	0.311678	0.293118	0.673123	0.578724	0.775075
1456818_at	LOC100047004 /// Stk32a	similar to serine/threonine kinase 32A /// serine/threonine kinase 32A	0.863089	0.735955	0.935807	0.805324	0.311308	0.342352	0.824671	0.327685	0.541253
1436190_at	Zfp618	zinc fingerprotein 618	0.995442	0.644432	0.80445	0.843635	0.311099	0.339397	0.870815	0.650732	0.823022
1419008_at	Npy5r	neuropeptide Y receptor Y5	1.15336	0.97028	0.974789	0.830287	0.31025	0.439505	0.759607	0.475359	0.746974
1421595_at	Fam184b	family with sequence similarity 184, member B	0.856545	0.512015	0.654086	0.841866	0.309214	0.328431	0.875137	0.401014	0.765191
1450977_s_at	Ndrg1	N-myc downstream regulated gene 1	0.755799	0.594804	0.88676	0.862159	0.307465	0.375395	0.771613	0.853425	1.35522
1440371_at	---	---	0.949741	0.617028	0.859469	1.07165	0.307105	0.420654	0.894136	0.444638	0.778447
1447550_at	EG666892	predicted gene, EG666892	0.929825	0.550739	0.786957	0.970604	0.306102	0.626734	0.720571	0.57726	0.603742
1449245_at	Grin2c	glutamate receptor, ionotropic, NMDA2C (epsilon 3)	0.732393	0.720808	0.727521	0.875163	0.300066	0.45031	0.76785	0.495348	0.778799
1437150_at	Fam110b	family with sequence similarity 110, member B	0.720652	0.863199	0.982848	0.759457	0.292035	0.628009	0.737856	0.834119	0.697114
1433909_at	Syt17	synaptotagmin XVII	0.868501	0.806395	0.894123	0.977159	0.290997	0.254443	0.810771	0.450026	0.550766
1455591_at	Zfp618	zinc fingerprotein 618	1.01458	0.691525	0.835929	0.987648	0.29083	0.317952	0.776351	0.327314	0.775424
1450976_at	Ndrg1	N-myc downstream regulated gene 1	0.801807	0.658288	0.986151	1.01651	0.28068	0.413132	0.828329	0.645708	0.911844
1436335_at	Plch2	phospholipase C, eta 2	0.670685	0.907452	0.887333	1.01324	0.28002	0.304843	0.772297	0.440077	0.704728
1424525_at	Grp	gastrin releasing peptide	0.67556	0.475345	0.694492	1.04271	0.270706	0.293335	0.825228	0.390068	0.673417
1448823_at	Cxcl12	chemokine (C-X-C motif) ligand 12	0.768751	1.00212	0.882224	0.767924	0.2677	0.174293	1.03589	0.242885	0.334336
1423450_a_at	Hs3st1	heparan sulfate (glucosamine) 3-O-sulfotransferase 1	0.915706	0.833399	0.924052	0.709446	0.260546	0.66089	0.724748	0.678977	0.879213
1452473_at	Prr15	proline rich 15	0.878707	0.777409	0.975555	0.833274	0.260042	0.269974	1.02728	0.196729	0.56519
1437241_at	Klf11	Kruppel-like factor 11	0.759482	0.6755	0.919923	1.31512	0.258456	0.801113	0.571337	0.543566	0.68715
1429725_at	Zfhx3	zinc finger homeobox 3	1.27925	0.286089	0.697007	0.814786	0.254041	0.407055	0.871552	0.503522	1.22755
1419155_a_at	Sox4	SRY-box containing gene 4	1.19697	0.556927	0.605485	0.60287	0.245955	0.523973	0.993971	0.75474	0.472485
1445579_at	---	---	0.823431	0.935887	1.44958	0.634439	0.242745	0.41161	0.675633	0.711957	0.994891
1455116_at	Relt	RELT tumor necrosis factor receptor	0.649043	0.656124	0.854928	0.942455	0.242468	0.453673	0.646091	0.516245	0.866176
1423348_at	Fzd8	frizzled homolog 8 (Drosophila)	0.884213	0.98268	0.821078	0.335024	0.242018	0.55204	0.670092	0.692188	0.610105
1421951_at	Lhx1	LIM homeobox protein 1	0.926958	0.484488	0.643941	0.961367	0.241262	0.228324	0.511726	0.338364	0.542499
1424214_at	9130213B05Rik	RIKEN cDNA 9130213B05 gene	0.842193	0.489481	0.745756	1.03293	0.240022	0.34142	0.859223	0.542006	0.705678
1440359_at	Fam110b	family with sequence similarity 110, member B	0.581291	0.735691	0.686098	0.863926	0.229913	0.404578	0.791925	0.68757	0.914913
1452433_at	---	---	0.998674	0.628354	0.642898	1.17031	0.227755	0.330974	0.608192	0.389314	1.12262
1438086_at	Npy6r	neuropeptide Y receptor Y6	0.72299	0.726771	0.739009	0.345038	0.225349	0.402941	0.46933	0.225816	0.744441
1450428_at	Lhx1	LIM homeobox protein 1	0.931438	0.680654	0.893444	0.873703	0.223403	0.24589	0.55486	0.379818	0.67394
1427624_s_at	Il22 /// Iltifb	interleukin 22 /// interleukin 10-related T cell-derived inducible factor beta	0.789968	0.638176	0.927803	0.648028	0.221341	0.618643	0.842336	0.290683	0.502977
1418603_at	Avpr1a	arginine vasopressin receptor 1A	0.648858	0.592486	0.693755	0.765384	0.21931	0.282455	0.681968	0.327757	0.656039
1435282_at	Gm967	gene model 967, (NCBI)	0.870384	0.664578	0.633537	1.00597	0.213385	0.472424	0.557896	0.627867	0.783519
1453247_at	Zfp618	zinc fingerprotein 618	0.878127	0.634435	0.7299	0.821168	0.212687	0.217403	0.773013	0.403613	0.575858
1444774_at	Det1	de-etiolated homolog 1 (Arabidopsis)	0.773198	0.830201	0.649463	0.755919	0.205861	0.286588	0.733216	0.343985	0.88183
1456096_at	6430573F11Rik	RIKEN cDNA 6430573F11 gene	0.599663	0.939543	1.04674	0.788576	0.204879	0.388774	0.662848	0.415233	0.544058
1423311_s_at	Tpbg	trophoblast glycoprotein	0.904286	0.634068	0.83119	0.914731	0.193181	0.283505	0.791506	0.435296	0.706818
1418604_at	Avpr1a	arginine vasopressin receptor 1A	1.0794	0.703913	1.0165	0.764442	0.185969	0.225683	0.939923	0.473561	0.363833
1443287_at	Gm1337	gene model 1337, (NCBI)	0.598506	0.66795	1.46005	0.918824	0.170774	0.044654	0.840302	0.190279	0.162187
1417333_at	Rasa4	RAS p21 protein activator 4	0.831469	0.896377	0.899211	0.885051	0.150863	0.276089	0.86215	0.377808	0.734747
1447329_at	---	---	0.703011	0.328504	0.770831	1.2764	0.136639	0.208775	0.649743	0.221777	0.994887
1436444_at	6030405A18Rik	RIKEN cDNA 6030405A18 gene	0.770863	0.859026	0.975606	0.657025	0.130263	0.325498	0.855681	0.646993	0.584182
1445815_at	Fzd8	frizzled homolog 8 (Drosophila)	0.568842	0.6247	0.549294	0.480449	0.127021	0.233157	0.789639	0.254988	0.723151
