# Supplementary material for: Lhx1 maintains synchrony among circadian oscillator neurons of the SCN
Source: eLife. 2014 Jul 17;3:e03357. doi: 10.7554/eLife.03357 (PMC4137275; doi:10.7554/eLife.03357)
Supplement: Supplementary file 3. — SCN-enriched transcripts and their expression in 83 mouse tissues. DOI: http://dx.doi.org/10.7554/eLife.03357.018 [file elife03357s003.xlsx]

## Sheet: Sheet1
Supplementary File 3. SCN-enriched transcripts and their expression in 83 mouse tissues.
probe	Gene Symbol	adipose_brown_4MJW06120815	adipose_brown_4MJW06120816	adipose_white_4MJW06120803	adipose_white_4MJW06120804	adrenal_gland_4MJW061208117	adrenal_gland_4MJW061208118	amygdala_4MJW061208119	amygdala_4MJW061208120	B-cells_marginal_zone_4MJW06120889	B-cells_marginal_zone_4MJW06120890	bladder_4MJW061208121	bladder_4MJW061208122	bone_4MJW06120811	bone_4MJW06120812	bone_marrow_4MJW06120841	bone_marrow_4MJW06120842	cerebellum_4MJW061208123	cerebellum_4MJW061208124	cerebral_cortex_4MJW061208125	cerebral_cortex_4MJW061208126	cerebral_cortex_prefrontal_4MJW061208177	cerebral_cortex_prefrontal_4MJW061208178	ciliary_bodies_4MJW06120897	ciliary_bodies_4MJW06120898	common_myeloid_progenitor_4MJW06120873	common_myeloid_progenitor_4MJW06120874	cornea_4MJW061208100	cornea_4MJW06120899	dendritic_cells_lymphoid_CD8a+_4MJW061208107	dendritic_cells_lymphoid_CD8a+_4MJW061208108	dendritic_cells_myeloid_CD8a-_4MJW061208111	dendritic_cells_myeloid_CD8a-_4MJW061208112	dendritic_plasmacytoid_B220+_4MJW061208109	dendritic_plasmacytoid_B220+_4MJW061208110	dorsal_root_ganglia_4MJW061208127	dorsal_root_ganglia_4MJW061208128	dorsal_striatum_4MJW061208129	dorsal_striatum_4MJW061208130	embryonic_stem_line_Bruce4_p13_4MJW06120817	embryonic_stem_line_Bruce4_p13_4MJW06120818	embryonic_stem_line_V26_2_p16_4MJW06120819	embryonic_stem_line_V26_2_p16_4MJW06120820	epidermis_4MJW06120809	epidermis_4MJW06120810	eyecup_4MJW061208103	eyecup_4MJW061208104	follicular_B-cells_4MJW06120849	follicular_B-cells_4MJW06120850
1444008_at	100039284	8.73	6.02	8.367	8.862	28.075	19.733	99.989	127.782	7.551	5.068	8.928	8.592	6.277	6.058	6.148	5.711	53.828	79.145	103.635	137.847	157	158.442	109.668	108.586	8.884	8.969	8.77	16.675	11.98	8.846	8.965	8.802	7.435	5.684	32.397	39.018	95.441	120.231	9.553	27.27	6.714	16.77	6.111	8.18	184.464	148.116	5.877	8.555
1419946_s_at	---	19.306	20.253	16.454	16.973	20.489	18.029	18.954	26.925	20.428	17.178	30.919	26.231	31.726	18.751	28.482	26.967	23.903	23.331	24.192	19.663	32.553	25.727	16.678	18.89	20.528	21.844	106.934	69.476	18.756	21.295	20.612	24.423	19.838	20.846	92.688	75.222	47.07	24.723	92.99	69.66	88.145	36.196	149.657	51.151	29.636	34.583	25.601	22.567
1435688_at	---	3.97	3.98	57.551	262.25	3.768	3.711	3.903	6.679	3.946	3.864	3.94	3.975	4.001	3.832	4.004	3.966	3.986	4.116	4.038	4.03	3.969	4.011	5.096	3.87	4.038	4.005	4.065	3.941	3.947	3.978	4.011	4.009	3.951	3.943	4.094	4.08	3.959	3.953	4.272	4.493	4.258	4.045	3.849	3.885	4.01	4.746	4.634	4.054
1435731_x_at	---	34.349	32.193	67.347	47.651	29.751	41.671	15.627	17.837	26.282	33.411	45.965	43.591	47.929	48.247	40.995	48.255	16.68	20.066	20.166	35.08	16.242	11.836	34.853	38.881	54.985	48.891	29.711	36.576	34.896	48.033	38.64	35.804	34.721	35.304	39.236	34.423	24.676	17.293	75.83	62.742	49.933	83.774	35.695	28.621	51.866	68.101	36.991	30.879
1437332_at	---	7.795	8.125	6.526	8.822	6.258	7.452	65.234	57.153	9.613	8.755	5.925	7.323	6.86	5.685	6.728	6.573	12.208	7.711	28.173	31.711	42.286	70.729	9.464	9.488	20.014	9.701	11.229	9.516	16.513	12.177	10.565	10.047	9.504	10.21	9.55	7.03	31.958	31.209	10.229	10.218	10.521	9.711	8.317	6.31	9.644	13.554	9.877	9.799
1437597_at	---	11.626	9.14	8.436	8.236	8.299	6.808	94.241	55.461	9.565	9.144	7.162	8.779	8.767	7.383	8.93	8.413	8.859	8.215	105.408	158.253	110.777	171.295	19.722	8.88	10.139	12.67	12.203	10.902	19.226	10.174	10.222	11.212	9.867	10.119	9.578	11.85	75.911	57.65	17.469	17.333	15.719	10.284	8.684	8.199	10.819	11.376	13.036	11.636
1439750_at	---	7.255	7.62	7.007	6.997	7.549	7.296	84.343	71.613	11.469	8.018	8.562	7.505	7.242	7.44	7.814	7.122	29.56	33.66	70.858	53.411	44.431	43.462	22.799	19.837	8.563	8.59	9.194	8.247	8.357	8.494	8.724	8.949	8.299	8.416	58.181	67.33	99.39	121.211	9.243	11.037	10.466	7.968	7.652	6.798	8.89	8.785	8.767	8.424
1439886_at	---	4.316	4.111	6.744	4.86	18.318	12.391	45.164	41.566	33.654	52.962	6.547	5.11	10.546	6.422	4.12	5.512	53.147	48.905	31.588	25.581	20.614	61.951	74.349	120.327	15.967	16.951	4.224	18.627	15.375	10.028	10.019	7.219	20.858	18.702	4.147	10.978	50.429	16.283	3.381	3.391	3.655	4.163	4.091	12.308	119.312	87.538	4.187	11.726
1442024_at	---	21.096	38.525	49.575	63.134	32.2	26.587	22.107	21.21	14.301	19.063	15.429	12.403	16.284	11.796	5.944	10.607	14.7	13.327	22.8	21.053	25.446	37.526	19.883	13.846	23.404	32.014	19.191	26.295	36.19	34.673	23.978	22.032	40.33	57.143	77.951	78.02	30.218	25.937	11.625	6.428	6.75	6.057	15.064	10.932	29.985	13.693	7.016	7.168
1442272_at	---	5.449	5.343	4.804	5.178	5.441	4.774	50.277	63.627	5.625	5.563	4.915	5.352	5.022	5.012	5.327	5.256	5.335	5.434	75.122	106.688	52.565	45.257	5.357	5.571	5.579	5.65	5.787	5.496	5.512	5.669	7.349	5.695	5.495	5.558	5.416	5.174	85.299	56.194	6.425	6.427	7.54	5.65	5.375	5.369	5.656	5.791	5.783	5.825
1443290_at	---	4.281	4.265	4.341	4.343	4.297	4.311	11.886	7.627	4.437	4.389	4.164	4.203	4.24	4.283	4.433	4.395	20.82	21.292	13.36	8.517	6.661	9.62	4.395	4.311	4.445	4.521	4.537	4.424	4.36	4.456	4.461	4.478	4.405	4.434	21.178	16.377	4.787	4.548	4.69	4.692	4.695	4.495	4.4	3.957	4.477	4.502	4.589	4.515
1444517_at	---	4.619	7.329	31.449	168.292	5.15	4.442	29.68	55.205	4.105	4.832	3.983	4.064	3.936	3.993	4.031	3.988	4.035	3.971	6.33	4.289	7.541	10.02	39.519	76.995	4.068	4.136	4.243	4.049	16.351	4.482	4.174	4.187	4.029	4.101	4.1	4.015	4.021	4.002	4.382	4.378	4.356	4.146	4.506	3.892	100.026	92.152	4.227	4.2
1447223_at	---	170.341	158.996	107.51	171.949	107.889	127.917	59.859	49.379	21.563	24.093	38.775	59.624	32.471	26.841	21.387	24.415	19.459	20.786	22.532	21.841	24.144	19.433	86.249	33.903	24.18	21.772	34.917	44.162	21.545	21.7	21.845	24.504	24.152	18.103	44.043	24.105	89.817	50.498	6.703	6.509	6.299	13.817	27.025	26.763	204.105	203.994	6.809	11.253
1449676_at	---	31.099	35.531	19.982	41.109	40.752	27.331	35.993	35.482	38.749	48.251	35.985	41.305	32.255	19.267	31.672	18.917	32.536	23.767	41.577	42.996	41.033	47.111	86.141	118.803	39.999	41.875	271.363	168.759	73.159	40.247	27.27	41.411	46.604	88.261	135.217	48.129	80.401	31.5	62.374	48.905	64.988	41.358	78.368	36.015	531.468	524.232	36.456	41.573
1455468_at	---	12.444	8.533	24.785	30.013	149.514	171.833	124.792	109.526	31.677	43.011	32.625	32.756	30.17	17.513	30.062	19.398	94.078	93.348	129.554	140.883	127.455	128.698	29.686	93.723	97.326	85.189	30.323	31.153	29.25	11.511	8.088	19.962	78.108	57.201	20.88	7.947	374.178	240.557	11.501	13.281	12.24	30.207	13.938	20.366	30.048	20.903	32.244	33.592
1456376_at	---	7.076	7.172	5.915	6.423	6.322	6.011	24.032	13.782	7.676	7.164	6.129	6.899	6.853	6.295	7.189	6.516	34.731	6.615	9.776	9.751	14.082	9.121	7.158	7.149	8.02	7.978	8.711	7.349	7.387	7.68	7.94	8.138	7.39	14.723	80.02	81.795	15.441	9.355	11.747	11.885	10.885	8.044	6.915	6.278	7.607	8.721	10.556	10.334
1460043_at	---	5.441	5.406	12.6	26.997	5.5	5.496	206.105	239.682	5.648	5.622	5.04	5.187	5.303	5.149	5.422	5.25	24.416	23.96	70.935	28.958	50.381	37.267	5.619	5.472	5.709	5.759	5.997	5.561	6.348	5.741	5.746	5.752	5.635	5.667	5.727	6.006	238.282	121.534	6.7	6.738	6.514	5.649	5.486	5.189	5.715	5.794	5.951	5.912
1437286_x_at	1110020G09Rik	20.662	19.352	17.911	19.488	42.712	34.548	18.366	19.481	19.63	18.117	14.948	9.302	79.113	86.818	23.09	77.688	20.825	15.799	17.775	21.178	19.545	19.432	21.433	43.69	157.508	125.03	34.972	22.427	25.398	23.294	34.178	40.612	14.475	17.34	10.84	9.222	22.334	18.538	39.823	39.816	36.598	79.12	16.425	9.62	22.615	25.289	21.168	24.143
1435062_at	1500001A10Rik	4.336	4.36	4.118	4.043	4.099	5.724	23.697	17.872	4.447	4.375	4.241	4.293	4.229	4.281	4.577	4.347	33.512	61.957	50.06	35.357	70.409	89.784	4.351	4.376	4.472	4.529	4.933	4.46	4.427	4.519	4.539	4.572	4.368	4.454	10.301	4.289	4.288	4.108	4.921	4.935	4.876	4.508	4.756	4.164	4.456	4.584	4.656	4.607
1429244_at	1500011B03Rik /// 2610524H06Rik	8.91	5.517	146.531	229.497	24.633	12.718	71.296	75.783	18.674	22.123	26.252	22.132	38.355	45.868	31.315	51.329	39.252	21.452	34.368	22.253	38.919	43.991	12.606	13.179	55.41	77.497	14.862	28.006	35.23	60.052	21.548	21.176	28.875	17.18	50.084	39.812	97.088	68.339	157.877	153.204	102.648	112.425	23.19	16.349	20.365	20.432	53.527	73.769
1453643_at	1700001L19Rik	3.636	3.56	3.548	3.554	3.439	3.498	38.388	61.657	6.979	4.141	3.469	3.532	3.567	3.514	3.614	3.588	3.526	3.457	7.372	8.525	44.481	19.986	3.794	3.604	3.635	3.673	5.312	3.559	3.614	3.65	3.656	3.701	3.593	3.643	3.671	6.357	3.74	3.523	3.894	3.863	3.878	3.672	3.536	3.393	4.407	3.705	4.225	3.727
1438142_s_at	1700021K14Rik	4.76	4.666	12.021	64.106	4.377	4.399	4.327	4.375	4.728	4.706	4.333	4.327	4.769	4.677	4.781	4.8	4.383	4.486	4.654	4.804	4.457	4.429	4.636	4.659	4.768	4.845	5.032	4.68	4.716	4.654	6.816	4.874	4.689	4.715	4.755	4.291	5.012	4.427	5.035	5.05	5.009	4.743	4.597	4.089	9.28	34.279	5.443	6.678
1435617_at	1700106N22Rik	8.993	5.132	7.189	7.772	7.427	7.613	15.991	12.326	97.421	78.63	10.304	9.813	10.221	7.908	8.961	10.449	26.627	19.131	14.135	18.402	10.522	15.252	5.533	8.248	12.599	10.728	8.239	7.668	9.273	9.819	16.713	18.451	15.569	15.062	19.665	37.709	15.489	10.568	11.315	8.576	10.284	12.087	7.551	10.702	8.079	5.33	24.663	19.879
1429909_at	2600010E01Rik	10.869	7.607	11.029	12.005	8.722	6.817	6.688	11.206	7.423	7.567	7.85	7.579	20.253	19.002	11.244	11.306	20.146	12.977	11.439	9.922	10.041	9.689	10.325	11.284	7.022	8.364	8.776	9.613	300.323	341.496	365.368	350.495	29.305	55.431	6.58	7.026	33.09	37.916	10.518	10.432	10.098	9.807	7.132	6.387	28.433	18.013	7.943	7.594
1456995_at	2700045P11Rik	11.425	11.871	10.042	11.35	9.915	10.904	30.313	26.564	12.113	10.324	14.833	11.121	10.128	9.616	11.922	9.523	27.103	30.804	25.49	43.151	50.875	32.094	18.585	17.338	12.194	13.439	13.631	11.896	12.975	12.245	13.412	13.522	11.543	11.872	12.048	9.651	36.739	65.476	26.507	22.022	21.789	19.173	13.826	8.796	17.047	13.769	16.338	16.889
1455170_at	2810001G20Rik	11.235	22.156	40.916	85.532	24.815	32.451	66.657	67.113	5.755	11.723	16.786	16.546	55.092	59.235	51.605	46.367	55.916	44.896	50.787	49.118	66.701	79.861	28.541	9.353	24.982	24.35	8.995	23.413	5.641	5.85	15.655	11.405	24.648	14.237	6.722	18.342	116.46	81.776	41.406	28.508	15.083	50.911	13.733	32.373	10.775	14.538	58.918	30.517
1438972_x_at	2810410L24Rik	46.454	29.918	168.443	206.874	112.335	104.141	23.421	22.468	5.435	2.758	18.857	8.277	9.348	5.831	3.233	6.2	12.116	22.176	7.361	5.897	9.458	8.317	144.288	161.053	55.629	47.505	35.065	60.399	5.297	5.055	3.936	2.805	4.988	5.413	6.022	8.935	89.528	21.289	6.225	2.933	5.273	3.582	11.19	25.498	646.891	642.372	2.852	2.835
1430073_at	2900016B01Rik	7.1	5.802	8.45	22.01	6.395	6.435	109.51	143.813	5.872	8.003	9.965	17.627	7.066	7.066	5.642	5.715	75.564	163.841	98.17	95.359	85.615	75.48	20.046	21.864	6.219	6.352	6.619	5.891	7.061	7.11	7.121	6.439	6.955	7.078	70.395	48.329	123.809	217.359	8.864	7.681	11.499	6.46	5.641	5.582	20.102	23.024	9.658	6.893
1443790_x_at	4930414L22Rik	15.382	13.282	16.647	24.981	22.528	19.539	106.608	103.325	17.204	13.293	12.676	15.061	10.927	12.636	11.919	10.603	77.081	86.763	61.639	69.801	64.211	43.95	14.488	20.674	28.775	27.142	20.603	19.077	13.437	13.674	14.014	15.554	31.722	29.371	20.087	15.397	145.658	83.883	15.156	15.75	14.56	10.31	36.094	58.816	38.854	63.59	16.018	16.368
1439671_at	4930466K18Rik	13.801	12.641	26.125	33.203	36.192	55.687	34.747	34.898	26.893	29.445	20.855	29.707	35.824	24.822	52.402	28.799	75.475	59.767	26.903	33.805	36.163	36.79	51.171	53.436	53.841	55.494	18.462	41.598	19.976	20.522	15.093	16.574	15.982	16.183	20.08	18.374	40.029	45.625	12.752	28.459	21.077	19.931	27.991	41.751	42.599	19.039	36.839	41.141
1435627_x_at	668321 /// Marcksl1	12.197	9.141	42.082	40.607	46.363	41.626	41.249	55.716	18.718	27.386	129.926	121.333	44.145	42.51	42.44	42.529	16.923	17.396	63.863	42.613	73.776	49.561	19.938	22.348	42.059	42.588	43.084	42.129	163.534	161.855	129.394	156.806	35.721	40.148	20.745	11.03	41.812	27.074	185.691	200.76	147.857	159.286	24.665	19.114	42.634	46.699	66.795	54.536
1442062_at	7120426M23Rik	46.731	34.613	27.685	33.988	58.238	90.583	18.094	27.641	17.075	15.192	63.854	62.221	17.543	20.025	12.252	10.407	18.752	15.239	10.52	12.249	12.008	19.012	113.371	87.965	49.41	38.691	68.012	77.788	19.704	32.597	12.234	18.154	12.202	15.285	133.12	123.423	15.528	15.113	115.045	106.514	33.586	90.494	108.893	123.965	104.913	94.026	11.12	13.085
1443934_at	9230110C19Rik	12.923	18.007	29.481	32.556	9.351	9.701	63.669	71.34	9.363	9.705	13.821	9.654	7.005	6.295	9.764	7.297	9.65	6.973	18.295	11.967	44.496	37.273	15.307	9.716	9.982	10.015	11.39	23.61	7.643	9.993	10.02	10.047	7.819	9.873	78.107	30.437	12.443	14.216	16.16	26.641	14.837	48.469	11.791	20.978	9.946	10.104	10.219	10.156
1439894_at	A730056I06Rik	6.142	6.142	5.957	6.295	5.418	5.956	48.784	45.982	12.746	8.483	5.164	5.328	6.231	6.069	7.023	5.654	91.18	45.71	47.111	61.291	38.093	48.347	110.031	91.586	31.165	31.733	6.355	6.221	6.197	8.609	6.171	6.196	5.817	6.131	6.34	19.732	32.433	34.975	6.081	6.076	6.049	5.926	6.542	4.865	23.495	12.252	6.209	6.257
1457075_at	A830031M15Rik	11.326	11.387	10.757	8.804	11.12	10.999	26.69	24.975	36.989	28.556	10.773	12.963	9.718	11.353	11.423	13.243	22.07	23.322	28.106	19.03	22.982	13.408	63.366	46.365	23.464	29.102	12.176	25.535	29.072	11.81	16.607	11.367	11.688	11.791	51.315	32.408	11.157	10.45	12.849	12.893	8.835	8.304	7.756	8.982	30.05	35.488	12.231	12.154
1436942_at	A930035D04Rik	40.989	59.271	45.417	68.163	27.56	24.69	36.442	42.872	40.282	38.437	71.55	26.397	43.732	32.629	21.904	34.472	15.683	10.24	29.775	45.178	31.42	43.144	54.335	76.662	135.845	151.928	102.37	59.343	28.105	23.903	44.243	34.506	151.101	68.052	18.587	22.614	60.388	29.757	10.14	10.018	13.773	17.817	18.88	30.687	59.93	40.449	22.988	27.797
1456625_at	Aasdhppt	69.965	79.66	41.717	34.458	72.634	48.116	77.386	73.738	26.086	30.553	46.566	54.519	36.327	34.509	39.625	42.596	56.326	25.533	71.677	63.745	66.648	72.742	39.903	37.091	166.368	141.824	27.711	29.763	44.724	27.567	38.458	45.441	50.104	55.583	29.03	23.663	162.685	109.156	112.627	115.93	48.404	120.767	26.355	43.532	25.76	29.084	28.034	50.575
1455328_at	Accn2	5.009	4.985	4.818	4.882	5.065	4.766	70.903	76.834	5.112	4.955	4.634	4.745	4.911	4.947	5.146	4.931	122.893	70.834	53.909	42.026	65.85	93.976	4.957	5.154	5.104	5.11	7.123	12.672	10.072	5.137	5.158	5.198	5.085	6.463	86.22	76.211	103.44	163.037	13.808	6.852	5.808	6.476	4.939	4.435	5.106	5.19	5.204	5.17
1449614_s_at	AI314976	129.673	116.388	194.737	237.407	92.392	88.847	35.398	36.087	195.041	202.75	160.976	122.162	186.68	255.706	278.092	243.827	27.615	52.353	24.61	29.998	36.569	35.617	51.212	54.237	166.017	191.759	89.842	95.887	62.179	87.506	161.698	113.34	149.464	140.191	48.758	51.298	76.7	42.027	410.55	366.258	506.894	480.136	88.742	108.079	11.229	10.996	427.693	413.3
1459881_at	AI595406	4.228	4.244	3.8	5.331	4.156	3.81	78.01	74.419	4.34	4.113	4.175	4.154	4.103	4.216	4.255	4.184	11.748	12.641	33.592	39.393	77.248	86.928	4.337	4.998	4.217	4.197	4.537	5.682	4.658	4.292	4.374	4.448	4.23	4.327	15.217	17.615	101.679	79.324	4.759	4.459	4.483	4.305	4.118	4.124	4.338	4.33	4.331	4.31
1436663_at	AI846148	5.114	5.147	4.851	4.962	6.025	4.813	16.499	11.275	5.303	6.223	5.023	5.564	4.987	5.015	5.061	5.021	5.07	5.026	17.61	6.954	9.208	10.007	5.166	5.132	5.282	5.852	5.45	5.223	5.223	5.342	5.372	5.405	5.238	8.011	7.974	17.014	5.024	4.983	5.754	5.743	5.764	5.296	5.068	4.854	17.393	5.421	10.148	6.873
1449987_at	Alk	5.916	5.777	5.375	5.658	5.959	5.639	30.199	21.91	9.632	6.078	5.641	5.866	6.031	5.851	6.013	5.906	6.046	5.751	9.206	11.43	9.996	14.88	6.094	6.088	6.133	6.248	37.029	17.325	6.102	7.319	6.201	6.348	6.055	6.111	6.193	7.057	13.175	11.17	6.578	7.811	6.661	6.203	6.075	5.885	6.185	6.243	6.303	6.412
1434312_at	Arf6	138.595	142.961	341.986	289.615	519.115	414.027	81.092	87.496	484.449	397.724	302.899	360.9	961.252	848.567	848.413	763.569	119.461	182.273	128.866	128.807	183.626	149.314	103.553	141.377	439.919	382.109	595.777	444.411	410.326	585.222	538.329	573.489	330.36	295.008	113.322	130.592	102.853	96.817	366.814	320.282	314.556	283.102	1002.51	1157.95	252.599	164.67	1339.71	1428.72
1417704_a_at	Arhgap6	21.002	17.484	12.04	9.917	11.247	8.95	99.656	140.291	74.064	96.771	65.059	33.549	105.267	79.756	60.115	52.7	8.609	8.616	14.025	11.185	12.144	13.391	32.685	64.424	52.764	52.234	20.747	15.793	44.911	32.494	120.257	152.703	84.515	84.661	14.76	8.734	19.395	22.635	21.171	32.685	18.122	11.835	20.035	13.039	24.753	27.314	27.319	25.359
1451867_x_at	Arhgap6	29.879	20.513	22.816	21.731	21.12	30.299	219.326	245.313	230.576	200.163	55.301	93.957	253.153	173.104	151.043	108.963	9.487	8.195	11.637	9.714	18.418	17.906	124.781	103.663	211.352	186.282	17.414	24.516	91.902	85.824	429.68	358.352	259.533	259.773	10.619	15.155	86.483	51.441	10.83	20.13	18.185	12.828	19.23	24.319	126.133	94.959	27.47	25.317
1435092_at	Arl4a	1093.26	1042.99	748.088	952.926	372.34	297.09	365.842	413.417	79.808	75.193	234.375	186.565	216.837	165.029	194.914	186.347	185.945	187.365	154.38	151.609	293.518	289.302	663.477	887.893	210.791	233.574	119.517	132.398	195.63	149.58	25.771	52.695	139.81	124.344	136.797	113.354	284.222	307.216	138.457	149.622	150.559	343.683	1031.74	1772.18	519.163	377.722	30.082	21.223
1450042_at	Arx /// LOC100044440	5.339	5.201	10.348	22.291	5.401	4.78	131.228	116.595	5.475	5.195	5.352	4.972	5.571	5.273	5.212	5.411	5.48	5.235	105.507	152.272	217.245	237.161	5.374	5.424	5.502	5.531	5.639	5.331	5.489	5.525	5.57	5.53	5.426	5.468	5.527	5.339	206.533	116.83	6.532	6.577	6.202	5.515	5.015	5.339	5.504	5.571	5.886	5.638
1419081_at	Atg10	228.941	289.083	110.215	106.246	189.359	174.862	67.814	49.603	143.04	151.729	84.577	60.197	37.544	27.76	26.862	25.368	24.857	19.359	44.992	45.612	33.968	66.199	115.407	255.043	245.057	276.563	202.557	166.519	175.997	167.762	164.523	142.156	280.404	157.595	102.294	90.909	155.884	85.602	31.053	30.653	37.027	25.392	56.689	91.119	413.024	387.803	31.61	36.457
1420037_at	Atp5a1	175.261	194.037	36.598	46.167	69.553	52.696	34.947	25.165	69.039	72.479	64.752	92.62	65.331	60.763	73.506	50.295	48.925	40.499	58.932	58.855	55.643	46.538	71.301	86.729	102.194	89.118	179.025	150.753	88.73	67.547	86.703	71.172	71.78	88.768	139.141	104.076	56.243	47.086	210.617	205.262	262.939	213.468	81.731	52.631	197.318	154.999	50.594	72.416
1458500_at	AU021034	4.407	4.441	8.412	52.778	4.921	4.09	4.127	5.145	4.48	6.486	4.254	5.884	12.928	6.643	4.296	4.27	8.186	4.137	4.407	4.318	4.127	4.227	4.356	4.343	4.475	6.664	4.87	8.121	9.162	5.453	4.839	7.767	4.596	4.449	4.213	4.161	4.764	4.075	4.938	5.034	4.743	4.473	5.111	4.003	5.115	28.933	4.949	4.615
1444041_at	AU041133	9.22	11.82	22.994	30.169	20.48	26.697	28.224	25.353	146.82	160.777	37.273	14.537	11.476	14.936	12.975	9.956	22.841	16.514	12.528	15.672	33.404	30.735	77.847	96.486	48.803	53.447	69.287	53.315	31.788	60.801	21.639	19.748	56	73.356	32.409	18.973	40.303	44.825	11.013	14.947	11.735	4.96	22.177	15.816	47.025	43.491	67.801	69.918
1438680_at	Auts2	38.965	50.992	76.254	99.837	164.562	146.079	436.884	381.494	7.11	8.529	478.612	390.369	13.428	14.536	6.146	6.603	337.556	403.808	265.318	324.527	418.544	401.868	60.167	65.741	23.896	27.159	292.565	270.815	13.938	7.856	6.657	7.921	7.677	7.764	345.61	413.717	714.355	753.033	125.237	56.741	145.346	72.439	178.174	237.918	66.447	74.704	7.097	6.93
1418603_at	Avpr1a	26.159	18.46	8.606	56.652	5.612	6.138	5.502	5.159	6.013	5.694	226.352	516.13	5.277	5.426	5.809	5.446	5.536	5.304	5.483	5.63	4.991	5.404	5.859	6.024	7.161	6.219	6.555	5.906	5.62	6.079	6.195	6.394	5.938	5.825	5.89	5.45	5.385	5.16	6.876	7.599	6.915	6.118	37.698	71.58	12.25	6.823	8.282	6.614
1442999_at	B930036G03Rik	3.876	3.848	3.875	3.87	3.848	3.845	8.674	13.938	3.927	3.806	3.857	4.249	3.724	3.747	3.821	3.775	16.894	3.942	5.028	4.756	7.008	11.002	47.253	42.263	4.53	4.778	28.132	3.948	3.959	4.234	3.96	3.968	3.82	3.934	3.874	3.751	55.219	44.624	4.508	4.176	4.159	7.598	3.82	3.74	11.03	33.039	3.989	3.968
1429432_at	Bat2d	15.125	11.265	12.261	10.713	15.439	21.47	14.246	13.656	158.131	114.386	15.579	20.384	12.972	12.827	15.54	18.962	14.931	9.854	15.563	15.553	15.982	17.109	24.32	16.036	76.781	81.559	26.337	18.71	36.132	18.693	27.2	21.273	19.036	30.992	18.859	28.847	10.303	46.302	41.438	55.843	38.979	66.654	50.54	14.057	26.275	44.005	111.304	272.67
1436493_at	BB181834	8.528	8.602	8.059	7.196	8.473	8.765	366.164	420.154	9.211	8.518	7.394	7.68	10.026	9.398	12.488	8.939	23.701	23.808	72.159	60.409	154.687	126.976	8.279	9.047	8.873	9.84	11.376	9.108	15.815	9.388	9.976	10.322	9.148	9.342	8.695	12.471	586.269	379.88	10.584	12.421	10.557	9.106	7.689	7.378	9.378	9.503	10.26	9.827
1451533_at	BC022687	7.145	7.226	14.359	16.567	14.493	6.862	43.855	29.001	7.194	7.094	13.974	7.825	6.921	6.918	6.993	7.095	12.304	7.054	34.02	34.012	30.1	44.984	7.274	14.151	7.324	7.521	19.222	15.153	6.886	7.632	6.937	7.666	7.434	8.103	11.107	12.346	17.508	12.64	9.995	10.404	9.241	23.715	11.533	6.395	7.536	7.944	8.02	7.831
1442032_at	BC030500	5.352	5.576	4.252	4.665	5.004	5.389	35.464	44.148	5.743	5.453	5.365	4.999	4.991	4.62	5.614	4.954	5.242	5.038	22.869	17.297	8.369	6.32	5.686	5.39	5.742	6.019	7.013	5.535	5.436	6.064	10.461	6.269	5.469	5.824	5.499	5.21	76.835	68.142	12.806	12.357	10.777	6.534	5.267	4.574	7.328	6.539	8.68	7.424
1437262_x_at	Bcas2	37.524	27.846	20.06	20.86	34.679	17.773	26.016	33.66	174.903	203.834	43.937	37.64	44.909	70.919	26.019	40.692	35.188	22.859	55.746	38.853	37.201	46.01	34.898	63.659	160.12	209.083	132.563	107.624	118.504	140.842	110.462	117.363	147.88	114.55	33.62	20.683	44.463	34.513	62.752	48.226	56.364	91.268	29.788	30.973	45.866	47.693	49.386	52.76
1456351_at	Brd8	9.156	9.56	13.141	21.471	13.016	20.985	60.061	61.682	62.731	68.621	13.824	13.378	42.749	19.683	20.37	21.793	43.126	48.459	24.493	46.749	33.044	48.713	95.032	88.249	36.658	40.197	41.914	40.248	41.624	29.435	14.092	12.343	39.083	23.774	28.771	35.802	77.707	55.532	65.755	106.633	20.794	48.767	36.375	26.701	35.925	65.909	15.229	20.539
1416886_at	C1d	11.948	11.157	15.607	13.265	12.311	10.294	26.123	28.405	12.591	17.199	11.963	18.355	34.798	26.814	24.884	21.636	11.18	23.346	20.665	17.153	25.344	22.903	14.983	13.395	114.706	103.773	17.554	26.024	29.882	30.491	68.114	81.219	26.426	42.411	15.568	18.259	43.493	53.199	35.01	29.183	15.572	41.196	17.655	14.582	11.411	18.062	26.674	8.372
1425175_at	C1ql3	3.963	3.945	3.878	3.881	3.84	3.85	1049.96	1110.69	4.06	3.983	3.807	3.914	3.944	3.961	3.966	3.958	44.8	14.484	188.106	185.701	541.09	784.786	5.092	3.952	4.029	4.222	4.15	4.036	4.043	4.091	4.095	4.103	3.992	4.053	3.999	3.968	3.909	9.015	4.274	4.164	4.152	5.008	3.953	3.78	4.078	4.605	4.17	4.09
1425176_at	C1ql3	3.973	3.725	3.705	3.768	3.658	3.685	557.56	714.35	3.955	3.928	3.399	3.952	3.961	3.842	3.973	3.793	4.104	7.969	155.289	186.45	558.547	635.668	3.964	3.953	3.965	3.984	4.004	3.841	3.933	3.945	3.955	3.977	3.937	3.941	4.384	3.928	3.894	3.885	4.162	4.178	4.335	9.744	3.937	3.822	3.995	4.033	4.737	4.003
1420596_at	Cacng2	4.121	4.209	4.472	4.063	5.925	3.895	96.261	91.037	4.224	4.14	3.976	4.051	3.402	3.863	3.903	4.165	325.447	308.429	179.763	238.575	179.482	235.861	4.134	4.176	4.215	4.275	4.32	4.195	7.451	4.22	5.299	4.3	4.162	4.217	19.581	17.871	146.221	161.187	4.58	6.053	4.565	4.29	4.124	3.846	4.241	4.287	4.304	3.97
1429167_at	Ccdc112	4.158	5.1	12.049	14.575	9.546	10.726	84.635	69.231	16.741	19.298	14.913	14.495	5.173	8.353	5.26	5.222	17.127	14.892	31.077	26.687	53.212	54.622	31.479	25.293	23.062	21.829	16.625	25.589	26.377	17.224	55.606	44.2	15.266	10.934	15.871	23.963	121.814	103.594	48.116	32.759	24.915	58.705	10.241	13.583	19.268	72.88	11.705	11.471
1458104_a_at	Ccdc153	4.043	4.887	307.023	871.48	7.237	11.508	13.995	19.401	4.908	4.874	3.791	4.771	4.614	4.762	4.448	4.777	7.346	6.182	5.71	4.262	4.658	3.8	4.79	4.876	4.945	4.971	5.032	4.899	4.89	4.952	4.969	4.97	4.833	4.887	4.59	4.881	14.887	4.797	5.289	5.301	11.171	4.918	4.778	4.556	4.966	5.122	5.056	5.015
1452992_at	Cdc26	38.16	39.646	41.496	61.159	51.863	56.811	38.73	72.075	49.518	55.572	36.777	41.809	71.32	55.627	34.131	45.762	16.321	25.744	19.728	18.77	31.429	25.8	33.596	50.903	300.152	287.69	63.395	44.565	50.879	84.538	116.158	72.433	77.033	59.473	27.605	24.595	49.044	57.854	123.363	73.664	81.757	84.679	26.417	42.718	25.361	45.172	35.256	38.784
1439103_at	Cdc73	35.917	35.407	34.307	31.32	117.434	83.647	31.053	32.818	49.757	62.688	47.562	40.781	34.22	32.136	30.991	32.548	22.477	32.614	33.804	26.408	30.859	33.39	59.388	57.822	115.332	85.269	39.856	47.457	53.437	60.099	47.961	60.33	36.357	38.667	27.956	14.329	62.736	33.778	77.625	51.974	90.164	111.939	53.963	70.815	62.157	45.806	41.416	38.41
1444736_at	Cdh7	8.381	8.296	7.109	6.993	7.693	7.665	13.645	24.334	9.516	8.307	7.619	8.32	8.627	7.496	8.67	7.581	105.325	131.68	14.063	11.564	37.997	24.635	8.513	8.516	9.471	10.014	12.178	8.925	8.881	9.745	10.665	10.243	8.934	9.342	8.837	7.477	18.489	42.622	18.453	14.643	13.492	10.131	9.498	7.466	10.186	13.697	15.389	12.529
1433450_at	Cdk5r1	9.459	8.604	9.424	9.901	29.419	11.91	1744.91	1416.58	58.404	38.377	9.067	8.082	17.869	9.528	9.613	18.648	189.808	192.227	993.155	1077.23	1490.54	1269.37	9.347	12.53	8.884	9.754	9.875	9.605	52.294	14.281	9.737	9.935	9.566	9.641	104.905	153.196	2766.75	2318.88	10.208	10.504	10.192	9.729	12.995	9.567	10.255	10.585	39.825	28.739
1457625_s_at	Cdkl2	13.55	10.652	9.812	9.478	10.173	12.77	37.07	30.351	12.706	9.508	9.739	9.673	8.36	7.25	13.94	7.194	8.547	8.646	9.827	13.229	18.565	24.764	9.587	8.606	8.743	8.882	12.063	14.25	9.287	9.389	10.55	9.413	9.498	12.838	174.994	101.837	28.43	25.803	13.913	11.78	10.157	19.114	13.094	12.519	36.019	45.273	9.411	8.985
1451440_at	Chodl	12.52	13.578	11.083	10.823	11.789	17.624	72.977	58.749	17.75	27.813	220.888	328.136	17.546	29.597	13.078	9.291	13.154	12.785	12.446	12.513	8.31	11.793	146.034	104.414	19.508	34.437	42.758	28.468	13.592	15.227	16.723	14.224	41.021	23.616	14.266	12.75	18.153	24.331	15.803	19.121	18.497	13.53	16.454	13.598	151.654	152.326	14.492	14.14
1445194_at	Cnksr2	9.357	9.182	57.049	63.119	14.17	14.089	105.291	105.42	10.264	9.082	8.402	8.614	7.344	7.585	8.463	8.801	183.944	154.483	343.024	118.771	103.567	176.668	9.653	20.418	10.21	10.535	11.603	10.464	9.722	10.491	10.375	11.249	9.406	10.089	35.206	40.924	484.216	399.295	17.176	20.698	14.242	14.592	9.457	8.242	11.093	20.189	12.743	11.591
1427822_a_at	Copg2as2	5.779	5.802	5.379	5.493	5.368	5.178	90.725	102.917	5.954	5.817	5.398	5.266	5.636	6.345	5.829	5.718	9.299	10.038	25.093	63.609	71.683	71.419	6.468	8.327	5.887	6.087	6.191	5.856	5.866	5.927	6.068	6.111	5.866	5.981	18.154	28.684	9.17	21.788	7.114	9.264	6.969	6.117	6.518	5.361	13.134	6.724	6.247	11.206
1437364_at	Coq3	27.414	27.894	7.286	7.277	18.008	20.493	12.537	14.015	7.367	7.063	6.648	6.899	6.764	7.098	7.143	6.881	7.448	8.11	8.628	9.871	15.359	12.821	7.328	7.083	7.447	9.681	6.536	5.957	7.152	7.493	7.513	7.597	7.426	7.338	7.575	12.034	16.653	7.357	7.877	8.949	8.32	7.604	7.289	6.914	7.553	7.597	6.649	7.675
1429943_at	Ctbs	19.247	22.182	55.721	49.793	14.651	10.744	15.17	29.533	19.945	24.291	22.581	18.539	18.457	37.345	19.71	22.698	11.993	10.283	14.259	9.133	13.936	17.527	19.185	45.811	15.103	21.173	26.253	27.482	38.457	24.127	53.477	65.761	39.854	58.507	8.761	8.964	60.082	34.434	12.044	11.163	24.462	14.34	8.242	17.815	15.232	9.545	21.035	20.144
1419765_at	Cul2	10.965	11.043	8.528	8.271	11.871	11.891	30.811	33.361	19.195	12.362	9.778	7.878	8.201	8.653	10.907	10.12	18.518	13.246	22.417	27.128	23.931	32.105	12.096	12.372	25.729	13.175	18.757	9.566	14.685	12.738	13.718	12.843	11.32	12.588	23.634	28.255	45.863	28.107	13.015	13.331	10.96	22.648	15.372	10.758	12.597	11.796	12.029	12.743
1419766_at	Cul2	10.965	11.043	8.528	8.271	11.871	11.891	30.811	33.361	19.195	12.362	9.778	7.878	8.201	8.653	10.907	10.12	18.518	13.246	22.417	27.128	23.931	32.105	12.096	12.372	25.729	13.175	18.757	9.566	14.685	12.738	13.718	12.843	11.32	12.588	23.634	28.255	45.863	28.107	13.015	13.331	10.96	22.648	15.372	10.758	12.597	11.796	12.029	12.743
1439772_at	D1Bwg0212e	58.17	54.833	23.1	28.493	65.481	88.636	47.907	65.395	43.754	52.924	72.812	58.38	56.747	79.625	59.474	104.556	67.75	56.001	63.277	66.985	59.182	59.008	58.022	57.242	39.787	35.919	52.282	66.196	25.06	36.544	33.61	24.859	59.569	55.001	69.257	94.111	38.281	32.134	212.436	195.453	217.477	279.802	42.859	107.042	59.202	60.735	74.171	83.566
1459661_at	Dcdc2a	5.926	5.997	469.977	1179.91	5.164	5.249	5.605	6.203	6.244	5.793	5.661	5.788	5.743	5.736	5.946	5.828	8.515	5.925	7.376	9.355	16.794	11.233	7.344	21.716	6.261	6.448	6.812	6.126	6.323	6.248	6.516	6.589	6.041	6.137	6.104	5.568	28.289	8.135	8.851	8.962	8.605	6.295	7.577	5.376	243.345	91.091	7.128	6.68
1448877_at	Dlx2	6.448	6.543	5.847	5.976	5.721	6.862	8.366	28.057	6.991	6.589	5.95	6.122	7.995	10.346	7.2	6.462	6.169	5.864	11.285	8.253	9.178	13.768	6.427	6.427	6.463	7.008	7.088	6.239	6.656	6.986	7.052	7.165	6.279	6.916	6.144	9.393	9.486	6.881	11.622	8.54	9.059	7.146	9.438	7.317	7.161	7.641	7.446	8.133
1452507_at	Dlx6	5.42	5.372	5.173	5.155	5.109	5.123	8.725	5.789	8.346	5.561	5.456	5.328	5.321	5.535	5.448	5.543	6.043	5.438	5.453	5.586	5.433	5.352	5.552	5.569	5.99	5.742	5.957	5.582	5.641	5.703	5.733	5.746	5.58	5.643	5.675	5.463	14.701	11.853	6.041	6.194	6.014	5.651	5.541	5.061	5.777	15.573	5.736	5.77
1419353_at	Dpm1	7.551	7.263	10.125	10.592	8.445	7.333	68.931	63.178	10.26	7.673	7.092	7.66	7.177	7.553	7.474	7.48	24.715	19.983	45.092	41.049	32.104	27.061	7.639	10.454	17.967	10.996	7.847	11.474	11.419	7.587	8.03	8.032	7.908	15.444	20.95	16.307	140.229	76.905	8.052	7.945	7.07	7.646	7.651	7.536	7.879	7.827	7.732	7.688
1429613_at	Dusp28	57.886	32.445	22.187	44.757	18.824	23.364	18.584	41.842	8.231	7.98	7.765	8.329	8.262	10.308	18.522	8.34	9.512	24.46	24.294	54.873	39.976	35.129	7.892	7.928	8.284	8.349	8.494	8.108	8.008	8.071	8.38	8.117	8.535	8.256	26.718	22.961	20.074	11.991	17.094	10.126	9.29	8.496	8.26	8.21	8.126	8.128	8.722	10.419
1436111_at	E030011K20Rik	3.794	3.759	223.592	741.805	3.583	3.638	3.537	4.013	3.827	4.299	3.646	3.753	3.702	3.735	3.769	3.737	3.725	3.675	3.784	3.776	3.675	3.728	3.753	3.767	3.84	3.876	3.922	3.782	3.802	3.86	3.863	3.892	3.772	3.816	3.821	3.692	23.56	3.69	4.05	4.097	4.026	3.834	3.753	3.548	3.819	3.883	3.938	3.917
1427523_at	E130112M24Rik /// Six3	6.302	6.652	5.59	5.276	6.604	6.57	14.801	17.713	6.282	6.277	6.666	6.693	5.813	5.924	6.675	6.707	6.64	6.592	6.737	6.633	5.789	6.676	164.625	127.438	6.34	6.668	40.126	6.585	6.574	8.338	6.694	6.596	6.169	6.337	6.167	5.793	275.106	109.395	6.879	7.333	8.074	6.631	6.64	6.085	433.111	380.299	6.784	6.645
1434297_at	E130304F04Rik /// LOC100040601	12.051	6.168	5.932	5.847	6.183	10.528	51.714	63.495	5.9	5.977	6.029	5.985	5.555	5.397	5.71	5.464	10.413	6.644	34.014	45.643	46.887	45.853	11.248	11.067	6.224	7.64	6.333	6.845	5.778	6.104	6.232	6.222	7.817	6.182	10.135	7.955	24.637	34.031	6.615	6.628	8.408	6.002	6.11	5.755	6.267	8.251	6.396	6.27
1452682_at	Fam122b	28.867	12.75	28.218	25.661	39.529	42.77	22.659	18.191	67.512	57.501	28.553	23.32	146.317	96.14	106.641	125.176	7.417	12.947	6.253	13.088	25.308	22.033	16.553	9.82	114.58	119.518	37.614	85.913	28.702	49.779	28.988	30.93	55.771	28.763	98.157	108.334	29.406	20.026	152.084	136.669	189.747	312.82	28.572	41.524	21.471	17.108	123.923	91.276
1419171_at	Fam174a	22.617	29.945	27.534	24.848	22.556	19.644	68.304	97.188	29.719	28.359	25.82	27.258	28.374	23.17	28.136	23.686	27.585	31.856	72.534	60.544	83.98	67.391	26.329	25.166	21.577	26.18	40.862	31.468	63.998	53.221	48.086	93.169	202.694	133.499	61.54	43.583	259.476	166.222	23.818	25.522	15.466	11.488	47.881	23.919	32.435	36.29	39.627	52.489
1426734_at	Fam43a	149.403	116.295	123.752	115.23	119.637	115.983	9.677	13.398	260.453	306.762	32.968	50.809	158.353	138.58	163.73	175.095	38.123	53.674	91.893	82.679	45.517	66.373	21.949	28.124	53.669	70.383	75.123	100.46	19.034	16.903	96.351	85.815	342.805	414.81	30.048	22.529	25.059	17.643	51.827	50.632	43.635	89.158	55.142	35.899	24.33	29.982	1238.11	917.047
1429310_at	Flrt3	9.58	7.1	15.523	17.163	153.526	98.377	311.109	264.527	7.538	7.086	422.001	336.916	6.941	9.943	10.445	7.069	174.367	179.235	191.962	224.55	228.844	236.007	332.753	396.096	6.565	7.915	10.527	8.097	19.307	12.037	6.696	7.034	6.503	6.564	133.98	149.381	1243.87	962.667	88.106	58.749	42.576	73.506	1274	1550.33	36.595	26.188	8.62	7.097
1418876_at	Foxd1	4.947	4.931	4.748	4.6	5.194	5.985	4.656	4.704	5.173	5.005	4.193	4.825	5.182	4.803	4.565	4.402	9.444	4.829	5.116	5.103	22.908	8.962	26.653	23.517	5.197	5.275	5.428	5.115	5.784	5.263	5.474	5.35	6.479	5.188	13.515	26.782	9.046	4.905	7.459	5.995	5.76	5.696	4.857	4.655	131.671	75.473	5.365	5.386
1421978_at	Gad2	4.623	4.602	4.605	4.347	6.844	4.562	1193.47	1409.13	4.795	4.66	4.43	4.528	4.495	4.534	4.621	4.57	92.498	135.361	196.53	106.673	285.768	235.627	4.617	4.674	4.936	5.276	5.368	5.267	10.07	4.818	4.869	4.91	4.756	4.763	4.701	4.498	744.665	1161.35	5.332	5.345	5.286	4.773	5.279	4.305	16.912	4.936	5.003	4.814
1437507_at	Gatad2b	20.573	23.522	22.901	24.638	19.169	19.4	22.45	35.282	32.917	23.813	19.616	20.166	27.632	20.013	20.935	23.204	46.704	32.571	23.931	21.249	19.311	39.197	26.628	23.109	22.509	22.941	23.955	23.237	21.465	22.837	22.966	23.341	23.551	23.02	28.363	21.205	27.317	22.922	27.5	27.784	30.154	27.014	22.977	22.459	56.924	47.867	25.16	23.776
1422868_s_at	Gda	21.809	27.934	14.289	9.641	7.873	8.038	88.898	156.17	9.234	7.888	11.162	12.644	502.407	447.299	617.462	813.812	8.732	6.665	31.5	27.387	122.409	84.328	11.237	8.986	9.051	9.236	293.926	262.019	7.977	9.065	9.375	26.029	9.16	8.989	15.76	11.243	43.229	84.359	10.229	10.259	10.161	9.048	9.809	7.834	9.132	11.221	9.246	9.539
1418839_at	Glmn	32.607	31.15	47.831	40.235	18.909	34.213	39.628	52.275	36.973	36.174	15.998	17.579	34.786	23.354	23.557	29.104	35.713	34.856	60.227	40.593	69.583	55.131	26.227	24.601	97.006	69.093	31.026	34.477	20.69	19.312	10.671	20.249	18.611	18.898	52.953	35.44	66.096	58.047	104.91	108.54	113.764	183.154	20.228	33.075	24.614	19.858	114.516	103.347
1434498_at	Gm1673	5.352	5.27	10.851	8.962	33.22	34.713	28.103	29.435	6.57	7.173	5.415	5.253	6.075	5.216	6.304	7.35	23.64	21.457	25.339	29.055	30.775	21.196	6.106	6.136	6.194	6.604	7.404	6.112	6.091	6.149	5.74	5.872	5.667	5.705	18.728	17.917	50.906	25.816	7.087	6.447	7.47	15.341	6.672	5.925	6.179	6.718	7.451	7.4
1435473_at	Gm347	5.393	4.859	18.259	17.712	15.38	17.803	51.679	65.629	9.165	5.75	16.496	17.192	5.632	8.05	4.899	5.586	24.243	40.167	40.627	69.459	51.633	62.159	82.741	85.181	45.274	49.38	28.653	21.926	9.142	6.645	20.72	7.003	5.581	5.824	8.753	17.545	5.597	6.172	6.329	6.286	6.584	7.317	30.129	8.741	18.235	16.022	6.013	6.017
1427789_s_at	Gnas	6.958	6.991	6.068	6.158	44.374	46.86	6.531	6.75	7.082	7.041	6.709	6.856	6.788	6.81	7.019	6.564	7.024	6.458	6.633	6.917	7.023	6.516	7.043	6.977	7.168	7.271	7.669	7.04	7.06	7.267	7.258	7.356	7.1	6.923	7.206	6.833	6.701	6.321	7.863	9.481	7.826	7.231	6.848	6.706	7.161	7.287	7.554	7.379
1423157_at	Gnpnat1	48.895	53.081	63.084	83.302	73.522	62.559	49.04	43.329	45.484	47.901	76.291	59.786	47.719	40.875	44.302	23.253	47.06	57.092	24.832	40.839	45.643	40.574	24.424	42.797	94.832	51.451	50.803	76.619	50.014	49.678	47.38	50.194	45.192	42.677	27.739	42.664	75.673	45.208	128.446	102.609	65.122	89.548	123.271	75.802	45.407	50.328	86.274	50.582
1426973_at	Gpr153	8.551	5.118	16.315	14.48	5.323	4.818	14.195	8.449	5.063	4.813	20.892	47.043	5.738	5.109	5.114	5.036	8.435	5.035	5.138	5.128	20.049	6.966	8.331	7.266	5.087	5.064	6.962	5.729	5.072	5.108	5.117	5.13	5.001	5.054	34.602	59.077	7.897	7.047	5.425	5.349	5.394	6.843	5.042	12.624	5.188	5.381	5.211	5.172
1451411_at	Gprc5b	43.794	51.213	5.163	5.167	43.028	18.394	25.292	9.222	4.947	4.829	4.816	5.252	4.758	4.848	4.941	4.788	45.458	51.547	36.033	30.376	70.104	36.876	9.124	27.691	5.143	5.026	5.369	4.975	4.944	5.053	5.019	5.101	5.007	5.062	10.374	7.492	82.685	137.682	27.456	6.413	5.519	5.336	4.796	4.557	6.016	6.137	5.373	5.272
1424525_at	Grp	5.208	5.291	6.89	4.988	4.871	5.09	282.949	451.537	5.619	7.785	5.298	5.224	5.964	5.232	5.314	5.222	5.438	5.091	235.387	261.173	328.607	255.845	7.072	5.351	5.47	5.504	6.137	5.706	10.479	11.968	5.638	5.54	5.496	5.462	5.359	5.161	5.144	5.127	6.449	6.271	6.31	5.736	7.828	7.644	11.791	5.551	5.5	5.58
1436756_x_at	Hadh	252.39	350.614	86.458	45.427	65.361	67.078	9.883	10.555	24.944	25.75	47.606	44.121	16.072	20.914	17.356	14.453	15.473	16.165	12.838	13.499	10.1	12.959	75.232	82.562	54.921	60.397	155.624	82.76	19.327	19.773	24.15	21.805	20.915	23.257	20.871	18.199	17.379	11.684	50.503	49.394	53.087	39.662	74.53	34.799	80.224	42.612	32.698	33.02
1429026_at	Hexim2 /// LOC100044959	8.335	8.489	7.626	7.499	7.433	7.779	23.938	37.388	11.168	8.238	7.592	7.714	7.75	8.28	6.32	11.539	18.691	19.559	10.567	8.433	9.82	15.191	21.628	18.773	11.079	10.618	16.132	12.555	9.373	8.498	8.517	8.275	8.113	7.344	9.13	7.603	9.36	11.756	9.832	8.646	8.981	11.303	15.185	6.67	9.223	8.583	8.407	7.611
1450050_at	Hira	17.76	21.823	20.903	20.237	20.241	20.175	21.049	22.626	53.567	54.002	21.909	20.654	22.132	20.582	23.272	23.196	22.421	21.869	29.25	26.93	28.555	22.583	23.368	23.258	165.894	148.123	30.404	40.82	49.217	65.329	58.555	41.83	35.37	52.024	22.266	20.911	21.884	25.306	84.964	78.164	47.041	81.669	20.683	21.166	23.476	23.826	23.69	32.839
1449482_at	Hist3h2ba	7.631	7.327	6.361	4.381	12.013	9.947	93.174	104.964	7.754	7.819	7.032	7.271	149.521	123.129	230.006	213.937	242.286	124.888	69.281	49.041	100.967	92.677	7.46	7.679	7.772	12.418	13.868	7.611	7.761	7.834	8.813	8.881	12.373	17.286	61.631	61.39	270.85	319.93	9.053	8.787	7.957	24.61	6.43	6.038	7.703	7.744	34.526	10.825
1449306_at	Hsf2	6.457	6.791	5.97	6.364	5.85	6.352	5.767	5.853	6.912	6.491	6.134	6.25	6.028	6.279	6.636	6.158	6.895	5.767	6.287	6.285	5.61	6.213	6.86	6.711	6.97	7.194	7.404	6.795	6.553	7.049	7.104	7.235	6.846	6.902	6.709	6.57	6.792	7.01	9.224	9.341	9.475	19.975	6.881	6.635	6.839	7.347	7.734	7.441
1416147_at	Hspa4	71.1	82.034	38.094	32.089	56.266	55.097	129.001	142.173	13.148	14.712	110.099	92.21	40.811	41.36	45.369	76.957	158.09	183.673	149.826	173.261	239.459	233.071	30.742	23.836	41.669	56.604	6.418	7.05	25.56	18.886	41.903	28.743	12.096	9.095	158.862	176.863	81.166	190.503	359.951	373.078	575.036	528.057	46.355	40.162	6.644	3.686	112.537	65.542
1447728_x_at	Hspa9	8.997	8.854	4.311	4.155	9.177	5.604	4.011	4.073	4.506	4.404	4.186	4.266	4.22	4.259	4.215	4.255	4.186	4.186	4.276	4.233	4.156	4.233	4.409	7.413	4.959	5.463	4.64	5.523	4.462	4.532	4.457	4.71	4.466	4.428	4.416	4.228	4.181	4.116	8.081	6.947	6.948	9.112	4.284	4.08	5.789	5.171	4.549	4.516
1438441_at	Id4	6.646	7.766	7.357	7.902	7.095	7.17	23.929	21.193	7.756	7.86	238.816	253.499	17.201	7.6	8.093	7.663	27.641	35.706	18.504	25.744	38.961	21.58	8.13	10.175	8.18	8.086	42.353	39.723	7.973	8.055	7.638	8.287	8.114	7.924	47.632	60.401	146.947	74.617	11.045	11.17	9.356	8.288	40.599	20.91	254.329	92.522	8.093	8.182
1438274_at	Ikzf4	4.533	4.463	5.923	4.313	4.462	8.974	45.355	31.206	4.478	4.443	4.362	4.468	4.656	4.28	4.492	4.453	19.787	22.662	39.644	24.715	23.2	18.419	38.609	18.342	4.492	4.401	4.597	4.43	4.48	4.513	4.514	4.522	4.423	4.673	4.483	4.278	9.023	11.482	4.838	4.721	4.71	3.9	4.436	4.266	5.724	4.998	4.599	4.596
1442073_at	Inpp1	47.793	39.488	29.814	21.328	15.474	18.805	38.244	35.558	30.052	18.788	19.288	15.951	37.309	52.722	41.656	46.089	155.125	160.084	45.644	42.926	35.315	43.77	30.925	42.968	30.346	25.712	74.273	68.78	45.011	59.127	31.953	29.632	21.357	22.59	74.355	72.857	63.681	42.321	12.678	15.492	11.939	11.183	15.067	13.434	19.051	27.826	34.657	35.384
1421399_at	Insm1	4.049	4.03	3.903	3.891	11.301	14.369	7.073	4.461	4.096	4.01	3.991	4.092	3.917	3.93	4.032	3.991	3.955	3.874	4.082	4.103	4.061	4.275	4.167	4.012	4.112	4.162	6.104	4.447	45.338	69.328	4.838	17.574	4.087	4.106	26.453	5.329	29.84	16.479	5.44	9.742	9.106	39.6	4.464	3.829	4.092	4.18	4.391	4.309
1418032_at	Itfg2	18.259	15.303	17.126	17.559	26.497	26.247	17.215	16.862	18.294	18.096	17.366	12.824	17.468	13.013	17.965	16.52	35.011	31.369	18.374	18.336	18.372	18.162	18.224	18.309	18.429	19.911	30.696	18.245	18.138	18.363	18.385	18.397	18.4	18.598	18.482	31.295	17.641	17.929	31.33	29.216	19.193	22.81	14.028	17.208	18.425	19.162	20.912	24.323
1422834_at	Kcnd2	5.042	5.217	4.514	4.49	43.261	5.203	281.552	366.98	5.192	5.064	4.813	4.946	6.133	4.887	4.926	4.841	1573.32	1404.5	271.104	307.109	320.131	395.993	5.033	7.977	5.204	5.297	5.873	5.111	24.323	5.259	5.327	5.512	5.167	5.178	6.008	8.374	1000.8	1349.32	5.809	5.868	5.787	5.163	12.278	4.989	6.008	35.619	5.419	5.328
1440980_at	Kcnh8	5.178	5.313	6.878	12.998	5.068	5.327	5.003	5.047	5.582	5.333	4.829	5.294	5.197	5.274	5.225	5.123	5.082	4.919	5.129	5.175	4.886	5.021	5.279	7.254	5.357	5.525	5.732	5.313	5.356	5.456	5.516	5.477	5.336	5.398	49.898	43.739	4.956	5.058	5.979	6.415	6.211	5.399	5.786	4.783	5.397	5.647	5.516	5.513
1440168_x_at	Kctd7	27.847	28.623	23.481	26.703	27.133	27.044	26.105	22.922	27.432	27.212	31.727	40.189	35.27	27.604	34.782	34.207	22.914	26.837	27.505	26.089	23.666	21.841	55.317	28.366	28.135	28.51	32.302	27.694	25.621	28.272	26.428	19.973	27.241	27.287	33.558	28.829	21.459	26.697	35.372	31.596	30.414	36.731	27.247	25.355	38.79	28.59	28.135	30.308
1435899_at	Kdsr	89.258	37.414	73.573	110.576	48.803	59.43	60.105	50.841	18.941	18.027	34.335	47.793	18.562	18.806	16.802	20.63	71.243	59.784	42.058	41.445	68.688	90.57	106.441	115.253	102.658	85.034	20.515	40.96	16.179	19.095	14.685	15.262	16.932	17.194	47.199	72.01	72.437	75.37	14.567	14.788	19.919	36.181	37.693	98.075	23.272	15.309	15.412	21.326
1434121_at	Lgi4	30.582	12.185	7.125	9.358	7.755	9.089	27.515	32.137	7.825	8.634	25.146	28.453	9.433	6.704	8.698	7.34	112.935	127.738	31.936	34.722	33.658	33.2	26.137	16.358	8.674	8.228	9.924	9.488	9.455	9.548	9.569	9.568	7.834	7.808	128.095	181.582	16.821	13.799	9.564	10.008	9.485	7.933	13.035	39.726	82.199	125.457	9.716	8.561
1421951_at	Lhx1	5.615	4.652	4.358	4.955	4.358	4.28	4.346	4.336	4.555	4.541	4.433	4.499	4.412	4.488	4.685	4.57	252.989	196.827	4.555	4.536	4.383	4.42	4.528	4.52	4.689	5.968	4.838	4.592	4.787	4.728	4.733	4.786	4.624	4.65	4.637	4.414	4.366	4.343	5.809	6.114	5.157	4.66	4.434	4.159	4.626	4.802	4.675	4.785
1450428_at	Lhx1	6.777	6.775	6.198	7.276	6.036	6.464	5.952	5.383	6.749	6.578	6.293	6.373	6.682	6.798	6.788	6.679	568.184	559.084	6.485	6.531	5.789	6.34	6.526	6.372	6.853	6.891	7.079	6.635	6.709	6.81	6.815	6.952	6.755	6.719	6.857	6.643	6.571	6.186	21.89	10.482	8.592	6.896	6.733	6.283	6.853	6.939	7.779	6.992
1457396_at	LOC100045013	5.215	5.341	5.763	4.848	6.432	6.352	4.835	4.899	7.193	5.026	5.023	5.125	5.007	4.972	5.25	5.15	10.902	4.885	6.218	9.245	5.41	5.545	5.301	5.212	5.353	5.367	5.516	5.253	5.035	5.387	5.412	5.181	5.284	5.269	5.105	5.058	6.776	5.173	5.873	6.274	5.823	5.333	5.147	4.862	16.902	24.011	5.606	5.607
1456140_at	LOC100045988	6.995	8.058	5.672	5.727	6.761	7.786	23.564	38.332	7.81	7.087	6.015	6.392	7.906	8.284	7.001	6.887	862.596	842.14	13.849	21.493	12.817	22.395	448.181	431.357	7.668	8.451	8.461	8.163	8.556	8.481	8.304	8.223	7.668	7.756	10.923	6.417	7.886	7.841	590.477	312.778	91.776	207.218	18.503	8.146	34.814	16.216	8.502	8.28
1456219_at	LOC100045988	15.438	14.9	11.768	12.39	15.73	13.697	51.018	40.148	18.344	17.112	10.599	10.967	14.594	14.368	14.871	14.259	1106.14	1021.88	36.741	27.342	25.611	31.894	502.999	883.627	18.432	18.562	34.882	27.676	57.684	38.923	17.178	18.666	50.961	21.447	15.611	13.054	13.132	13.734	445.17	388.111	272.239	230.221	25.299	13.181	173.839	89.965	17.731	17.641
1440282_at	LOC100046693 /// Tulp4	20.677	24.151	32.88	25.187	24.796	16.312	37.933	34.684	29.298	22.573	30.688	19.165	13.924	15.265	15.437	14.22	41.257	20.106	56.194	33.276	52.137	54.392	23.547	18.157	15.016	19.859	41.848	42.042	20.586	25.228	25.706	20.735	16.782	18.99	43.267	23.219	82.755	65.898	29.393	37.47	30.533	18.517	30.347	23.168	43.696	53.767	23.092	27.895
1456818_at	LOC100047004 /// Stk32a	11.272	11.383	9.58	10.841	18.319	16.863	9.528	11.308	10.149	10.419	10.918	10.225	8.509	10.287	8.931	8.978	17.878	26.375	11.565	11.112	10.843	9.159	11.006	11.438	11.02	11.231	11.669	10.706	13.17	11.118	11.687	12.084	9.823	11.192	11.355	12.058	245.418	174.341	18.644	13.317	16.903	11.061	16.832	8.598	11.735	11.811	13.529	11.52
1439263_at	LOC14210	23.979	28.097	26.7	32.116	36.505	37.094	34.826	35.442	57.6	45.297	49.86	36.84	38.942	44.12	45.106	51.331	57.792	52.691	54.618	53.925	41.323	75.86	151.268	198.856	287.25	347.014	266.603	224.485	172.654	179.253	91.248	162.616	86.666	59.519	21.691	17.903	115.254	87.749	63.861	37.327	36.858	64.36	54.322	26.835	340.228	160.978	42.221	42.335
1442347_at	Lrp8	7.171	7.532	9.521	9.336	9.853	9.684	111.181	82.139	9.378	7.363	6.965	6.681	13.392	10.781	11.621	11.112	86.21	103.61	93.027	87.875	123.756	104.364	17.382	30.573	25.608	19.483	13.052	12.355	12.351	12.689	12.937	13.318	594.621	676.355	56.946	60.382	15.991	16.385	10.236	10.25	10.384	9.817	7.754	7.883	26.044	28.08	8.359	8.904
1452378_at	Malat1	84.827	89.477	331.162	395.636	1017.87	533.658	209.709	204.148	1169.98	1047.69	176.509	168.249	170.525	124.149	225.841	217.558	137.866	227.525	257.791	183.268	271.958	209.192	1488.44	1461.63	150.876	313.479	147.582	372.051	908.015	1513.73	757.835	363.812	968.557	456.579	340.279	212.713	467.262	968.376	12.18	17.065	53.761	85.236	695.286	359.256	681.665	690.919	206.397	463.44
1425513_at	Map2k7	26.465	40.639	20.901	26.081	28.307	19.143	23.284	35.093	33.572	59.059	26.536	18.479	17.526	16.215	50.116	35.326	32.001	27.537	32.057	20.081	33.649	33.29	18.411	24.46	78.973	91.701	28.294	26.279	18.785	46.527	18.575	10.255	81.955	65.464	22.995	34.497	44.202	117.672	45.831	25.23	29.823	38.485	18.45	18.858	37.381	51.869	57.398	83.93
1434602_at	Med13l	81.03	130.196	111.553	156.77	224.695	255.542	210.509	187.657	53.764	56.733	102.314	96.707	523.083	389.512	448.264	368.575	83.891	154.756	228.155	226.947	299.088	305.011	85.347	77.849	93.924	144.703	109.519	62.728	52.233	86.047	45.766	106.573	96.374	42.655	55.131	72.726	424.985	337.832	226.881	212.904	250.662	357.228	462.444	479.714	54.671	110.548	225.511	188.883
1448374_at	Med28	17.148	28.36	13.021	16.622	13.745	13.229	34.351	43.898	24.686	22.063	13.274	17.044	11.657	9.56	10.261	14.707	37.866	23.678	60.521	59.142	35.158	58.2	21.867	28.247	28.244	38.623	25.288	27.245	22.54	35.075	40.087	40.825	32.854	39.06	126.948	80.142	28.625	29.668	19.515	15.131	14.769	15.517	12.036	9.437	28.846	21.146	25.417	29.833
1456582_x_at	Mff	31.776	36.156	28.397	32.997	47.356	33.454	33.155	62.476	42.08	38.37	28.225	26.842	33.842	33.805	36.215	34.54	35.517	34.132	91.986	71.405	34.352	99.554	52.835	61.044	43.473	40.675	62.123	41.819	36.628	38.046	39.375	40.313	38.19	37.084	36.797	34.741	92.916	56.882	32.712	31.647	29.06	25.457	31.809	24.067	98.186	72.059	39.37	37.994
1440097_at	Mirg	9.116	9.742	7.713	8.575	47.983	98.041	85.379	37.77	9.444	9.137	9.065	12.85	9.239	10.003	9.182	9.019	12.438	12.352	16.18	24.797	16.539	60.365	9.24	9.674	8.245	9.383	9.924	9.523	9.284	9.58	9.596	9.743	9.634	9.639	36.041	24.497	22.439	10.463	12.056	11.406	10.455	10.785	9.136	9.709	9.777	9.825	10.009	9.495
1421230_a_at	Msi2	18.617	14.921	34.903	52.277	67.445	34.944	18.464	27.991	16.541	29.403	49.837	39.163	13.912	9.826	18.74	18.942	17.284	29.488	29.38	18.301	15.504	18.826	205.049	181.933	41.238	27.525	73.327	99.338	31.439	25.82	19.326	19.489	51.06	82.681	16.164	13.523	25.835	30.421	24.167	13.956	8.957	19.054	11.954	7.894	120.565	149.096	26.346	19.825
1426768_at	Msl3l2	16.518	16.986	20.335	20.331	19.75	21.147	129.694	113.522	17.062	16.691	16.948	20.664	34.701	26.613	22.188	20.633	36.512	36.911	51.689	63.348	75.626	111.586	16.195	17.12	44.911	49.199	19.938	17.657	15.009	12.234	20.784	18.053	17.955	11.999	29.163	20.322	115.946	122.425	17.97	18.036	21.091	19.331	28.968	13.149	11.981	12.449	19.963	25.556
1422544_at	Myo10	31.2	92.856	41.551	33.207	30.107	40.073	28.572	26.253	29.776	41.023	27.69	27.904	35.106	33.774	13.786	16.042	57.871	43.549	17.602	20.84	14.075	18.036	62.405	79.136	15.847	16.104	80.577	25.227	6.497	7.239	16.093	16.08	50.063	28.119	13.532	17.243	15.913	27.512	183.551	178.99	141.347	317.554	21.228	39.329	32.77	40.115	7.652	5.904
1421592_at	Ncam2	5.038	5.116	4.795	4.738	4.726	4.763	10.15	11.512	5.305	5.071	4.775	4.917	4.933	4.865	5.116	4.956	10.864	9.765	5.838	6.183	7.666	14.165	5.685	5.1	5.274	5.368	5.5	5.179	5.208	5.338	5.349	5.41	5.261	6.16	45.7	36.657	22.108	25.129	5.906	5.692	5.651	5.183	6.338	4.717	6.373	9.267	5.38	5.565
1449474_a_at	Nelf	3.004	3.055	6.256	15.041	3.7	4.14	96.361	127.515	2.992	2.821	3.818	3.084	2.909	2.971	2.971	2.917	5.159	6.77	127.879	142.754	182.761	227.474	2.83	2.838	2.796	2.228	3.067	3.001	2.449	2.792	2.858	2.844	2.784	2.844	5.497	9.173	14.529	20.375	3.132	3.143	2.92	2.889	3.062	2.994	2.872	3.05	3.072	3.058
1442397_at	Nfx1	9.095	9.244	8.101	11.044	64.471	44.947	16.492	32.118	10.927	10.428	8.506	8.752	8.293	8.761	8.734	9.01	34.617	22.317	19.505	29.999	34.338	15.84	9.066	16.516	36.128	39.802	13.257	9.412	10.644	11.147	11.196	11.368	9.581	10.899	13.324	14.982	38.659	53.876	38.045	18.128	20.468	45.694	10.168	9.046	9.591	11.368	13.413	10.271
1436475_at	Nr2f2	11.766	14.81	48.28	90.655	72.793	43.682	400.472	371.547	11.55	11.093	115.591	110.705	8.071	6.326	7.325	7.24	10.69	8.348	10.383	10.344	9.128	10.527	185.151	179.829	7.713	9.276	69.873	122.593	11.86	11.782	7.837	7.978	7.388	7.615	49.82	24.735	6.772	5.952	7.455	8.336	9.09	6.594	10.732	8.777	75.297	53.696	7.934	7.624
1433413_at	Nrxn1	3.819	3.784	3.647	3.638	3.81	3.662	16.852	33.845	3.852	10.606	3.669	3.693	3.7	3.733	3.799	3.751	28.204	21.562	13.354	21.119	8.555	14.679	3.823	8.175	3.862	3.905	3.951	3.848	3.835	3.893	4.555	3.924	3.814	6.074	3.878	3.772	61.311	209.402	4.023	4.043	4.008	3.861	3.84	3.539	3.883	4.248	3.931	3.917
1435907_at	Nrxn2	5.122	5.156	4.725	5.051	6.697	5.004	147.357	129.03	5.114	5.088	5.079	5.129	4.975	5.017	5.151	5.116	245	283.249	128.345	146.396	260.041	264.017	10.014	6.019	5.13	5.164	5.249	5.131	5.123	5.144	5.168	5.176	5.103	5.135	64.13	78.852	115.086	167.703	5.556	5.574	5.4	5.151	5.096	4.621	5.822	5.226	5.27	5.234
1435061_at	Nudt10 /// Nudt11	16.157	16.45	22.175	18.691	15.388	15.617	208.127	179.788	18.462	16.45	14.151	11.582	14.025	9.784	10.815	11.338	37.269	32.954	116.095	125.716	163.068	177.586	13.694	35.091	26.211	19.341	34.172	17.267	30.639	18.998	18.062	18.654	17.821	17.818	22.442	56.016	179.013	111.427	28.006	28.342	27.885	22.809	17.026	7.448	21.631	20.736	17.854	14.167
1437213_at	Nudt21	63.99	77.274	26.371	23.171	315.137	293.977	104.951	67.975	22.689	20.776	232.682	98.046	43.6	195.203	274.413	312.212	544.786	259.352	328.041	214.487	290.781	241.459	143.739	182.372	31.548	57.578	41.68	33.184	35.791	42.671	26.713	31.304	26.792	29.332	316.486	383.599	31.571	64.068	644.288	590.021	348.76	379.524	581.944	242.153	65.728	95.555	30.174	36.256
1415728_at	Pabpn1	94.026	79.557	402.788	482.854	735.634	551.916	305.772	293.696	87.137	96.591	126.92	71.95	341.9	314.019	280.219	333.514	164.913	213.705	204.76	162.28	333.158	335.12	81.046	122.474	154.579	173.415	37.657	166.335	79.805	146.547	55.629	59.575	105.484	36.455	74.3	50.779	312.034	241.498	553.61	481.271	426.964	582.805	350.521	290.04	362.442	182.142	257.13	246.929
1425521_at	Paip1	19.071	20.497	27.691	45.392	40.432	31.373	15.682	19.518	18.183	14.364	17.404	21.506	19.523	18.593	14.173	11.974	12.613	10.725	19.251	19.459	17.8	18.488	18.047	19.291	27.901	28.3	27.909	22.432	43.011	20.724	28.843	26.217	20.15	23.445	16.305	17.954	116.927	50.358	125.882	98.339	24.535	25.352	18.848	17.13	38.509	21.035	24.391	21.338
1418908_at	Pam	32.124	25.603	33.817	34.438	101.987	93.998	78.418	70.655	19.043	18.635	107.052	102.191	24.144	22.403	11.903	9.748	10.313	13.026	41.46	30.282	87.927	101.258	95.236	153.06	22.191	20.588	27.561	51.962	24.52	23.03	19.289	19.426	18.808	13.068	84.73	77.442	108.984	85.352	20.614	20.667	20.545	15.765	63.699	23.54	31.039	101.292	19.658	22.384
1447991_at	Pcsk2	14.073	15.838	9.707	10.359	10.245	10.961	20.005	36.99	17.14	12.119	12.597	12.453	11.97	9.585	12.813	10.581	28.354	26.472	115.426	68.827	75.835	43.545	13.171	15.992	17.046	17.154	19.772	16.401	17.289	16.235	17.186	17.53	16.979	18.903	26.618	39.574	136.336	58.122	29.007	28.872	27.197	17.656	12.917	9.989	17.218	28.159	24.6	17.643
1454625_at	Phf6	13.883	11.378	214.682	349.355	29.523	29.13	57.055	30.331	67.55	53.781	32.19	28.845	46.245	73.612	52.822	68.578	33.724	36.006	54.181	31.827	45.462	42.269	35.079	55.73	161.213	151.343	43.665	39.688	38.416	62.274	72.083	59.119	40.302	50.809	36.513	33.258	71.384	43.417	71.575	53.755	65.791	79.838	33.741	29.662	14.813	39.956	166.742	168.789
1450389_s_at	Pip5k1b	11.588	11.05	87.465	143.292	14.272	17.368	62.919	98.348	10.941	11.788	10.966	7.269	152.976	127.612	141.145	140.428	216.514	217.544	44.411	54.408	23.897	47.092	163.029	247.054	14.745	18.336	11.226	12.542	14.584	11.052	11.117	9.928	10.939	10.965	14.824	14.004	14.549	9.907	11.503	11.525	13.359	13.316	7.662	6.251	14.639	16.636	15.527	15.094
1421137_a_at	Pkib	10.776	11.07	14.602	9.533	10.199	9.184	92.743	75.787	332.749	332.477	7.167	8.919	49.226	55.078	76.035	64.696	472.623	545.543	50.205	45.316	30.274	30.669	10.701	12.636	230.561	273.836	11.277	11.145	815.921	1133.97	741.261	647.992	1281.75	876.143	258.038	194.391	9.891	13.844	15.378	14.325	16.449	11.299	190.89	374.566	22.151	18.783	353.872	297.521
1437030_at	Plcd4	28.639	140.331	3.982	4.01	3.96	3.979	49.128	43.657	4.036	3.736	4.016	3.735	3.626	3.915	3.951	3.791	23.637	22.584	31.507	31.003	22.58	25.424	3.902	3.853	4.045	3.834	8.44	4.325	4.036	4.076	5.683	3.945	4.031	3.91	189.748	347.972	21.457	20.37	4.445	4.271	4.442	3.989	14.954	15.02	11.306	4.149	4.148	3.987
1435699_at	Ppm1l	5.937	8.354	5.086	5.078	5.389	5.034	61.365	54.251	6.443	6.45	6.775	5.741	5.824	5.864	23.331	32.393	42.533	31.064	53.483	34.003	22.822	61.906	6.595	8.405	5.984	6.03	27.422	17.917	5.94	6.378	6.067	6.004	15.935	14.971	51.271	56.076	8.88	8.253	6.256	6.275	6.263	4.84	5.471	5.674	6.937	6.505	6.101	5.221
1422673_at	Prkd1	261.562	257.573	120.895	178.023	66.949	68.795	25.859	28.881	7.551	8.97	14.519	17.966	10.62	8.792	6.381	5.535	15.267	20.544	33.116	20.725	37.777	36.523	78.87	109.469	11.219	5.768	11.434	11.39	11.182	12.617	11.478	5.799	12.389	11.178	171.958	198.851	123.456	112.238	11.769	11.794	11.753	31.399	10.742	9.333	113.559	100.449	5.866	4.781
1447623_s_at	Prkd1	937.497	941.541	813.161	749.257	586.992	641.893	148.101	119.519	10.3	6.321	44.058	61.836	30.73	9.32	6.325	6.192	42.502	41.901	94.741	89.402	139.941	83.876	576.05	501.632	6.547	7.841	22.682	40.085	47.142	20.964	7.774	7.701	9.569	8.079	731.254	845.477	555.404	445.698	76.999	57.335	107.708	119.981	63.353	60.761	1502.18	1409.8	8.617	7.822
1435162_at	Prkg2	16.232	6.625	5.753	8.517	140.326	107.158	256.127	185.874	6.969	6.264	6.594	6.077	5.83	6.087	6.03	5.903	5.887	5.403	102.553	120.974	102.599	85.549	5.595	6.039	6.195	6.796	6.618	6.384	6.077	6.337	6.498	6.385	6.136	6.152	90.422	85.583	30.86	27.943	26.665	34.994	8.537	55.623	8.097	5.84	10.384	6.561	6.621	6.603
1435460_at	Prkg2	5.949	5.06	5.348	4.728	103.537	101.391	92.076	119.765	5.14	4.998	4.831	4.962	4.895	5.069	5.019	4.834	4.943	4.834	76.421	99.019	83.294	45.077	15.792	16.587	5.125	5.201	5.228	5.282	5.113	5.15	5.187	5.232	5.081	5.123	80.528	43.769	14.621	15.426	6.436	6.222	5.731	35.472	32.973	6.086	19.363	17.447	5.423	5.273
1437695_at	Prokr2	7.004	6.7	6.049	6.184	6.363	7.059	59.002	91.223	11.032	7.547	5.948	7.221	7.265	6.388	7.318	6.312	7.174	6.218	6.912	6.91	5.728	7.184	7.279	9.286	7.247	7.357	15.911	9.237	7.099	7.322	7.311	7.34	7.218	8.343	57.768	116.086	7.189	7.178	9.083	9.194	9.322	7.284	6.807	6.303	15.482	7.735	7.52	7.587
1440564_at	Prokr2	4.711	4.772	4.457	4.41	4.38	4.392	40.163	30.148	4.877	4.785	4.506	4.643	4.605	4.607	4.772	4.648	4.66	4.488	4.724	4.775	4.488	4.617	6.461	4.735	4.943	5.029	5.188	4.84	4.829	4.984	4.996	5.075	4.828	4.898	40.669	44.021	4.538	6.089	5.61	5.601	5.541	4.922	4.757	4.403	4.829	6.351	5.186	5.12
1456681_at	Ptchd1	11.071	10.051	8	7.984	8.645	8.545	10.635	15.424	10.847	10.948	15.503	13.91	10.909	8.669	8.419	10.451	67.753	53.366	49.267	23.5	31.642	65.22	18.566	18.464	11.067	11.175	12.671	11.042	10.845	11.121	23.322	19.046	10.878	10.904	10.251	10.293	111.162	61.797	18.246	13.867	15.468	11.199	9.4	10.095	10.231	11.298	11.469	13.063
1417529_at	Rab33a	4.834	4.926	5.156	4.593	96.262	46.663	805.247	713.656	5.304	11.899	5.168	4.819	5.308	4.854	5.354	4.807	259.149	256.305	483.889	496.477	700.732	677.464	6.339	5.348	5.483	5.686	5.636	5.033	12.523	5.056	5.643	5.833	5.063	5.318	392.724	337.863	589.512	416.512	6.414	6.026	5.93	5.574	5.338	5.019	5.426	7.185	9.496	5.632
1424684_at	Rab5c	240.146	212.01	94.954	120.797	263.131	227.147	118.272	111.17	51.679	50.706	106.055	97.574	401.891	303.431	329.338	617.75	168.365	108.447	128.545	117.219	210.195	157.844	28.57	41.919	93.674	67.883	52.851	93.807	61.6	72.902	112.675	87.113	78.576	78.987	130.675	127.875	123.466	130.155	368.301	298.031	252.495	322.48	222.188	125.605	30.107	42.693	228.493	181.812
1455420_at	Rad23b	31.561	33.635	42.646	44.564	65.667	66.02	132.637	129.028	49.517	46.3	66.699	51.119	25.399	20.4	17.354	14.804	60.359	45.928	114.052	153.776	155.471	168.104	51.705	66.723	106.078	87.355	68.847	78.901	60.397	55.425	36.617	49.535	40.323	43.119	62.525	50.601	131.448	108.742	138.324	102.459	95.5	178.743	39.008	49.055	52.829	53.786	45.883	47.724
1426478_at	Rasa1	52.143	45.636	58.352	108.809	61.8	45.666	68.538	77.952	57.351	120.273	40.805	49.848	59.012	60.61	53.379	73.406	78.88	73.962	44.366	56.075	52.219	43.466	37.846	45.042	34.613	45.048	31.586	30.544	35.981	31.157	26.145	32.125	49.643	22.227	98.493	91.79	42.188	31.672	39.125	48.924	50.289	65.259	70.038	92.42	35.793	14.188	193.2	119.795
1423619_at	Rasd1	175.483	356.405	1109.1	696.739	20.901	37.994	7.436	17.174	4.434	4.776	4.754	4.789	4.763	4.77	4.811	4.697	4.894	4.731	9.786	18.393	8.544	5.611	3.751	4.281	4.855	4.89	4.59	4.808	4.378	4.493	4.453	4.537	4.777	3.762	4.88	4.997	10.58	4.734	4.89	6.173	5.086	4.903	11.973	17.046	4.352	4.907	4.609	4.926
1435419_at	Rgag4	6.842	6.842	10.567	10.532	14.103	25.094	44.925	37.792	7.017	7.254	7.256	7.306	9.08	7.285	6.847	10.392	7.266	6.521	27.069	13.48	18.975	16.157	10.612	7.335	7.262	7.406	6.986	6.911	9.138	9.005	7.379	9.247	7.276	12.985	8.656	7.201	9.829	10.259	7.182	7.203	6.801	7.007	6.698	6.291	6.934	7.443	6.312	6.965
1426037_a_at	Rgs16	6.193	6.306	86.054	6.649	5.428	5.238	22.926	27.513	6.952	6.296	6.364	5.377	6.708	6.338	6.755	6.044	40.981	11.981	22.907	35.915	14.116	28.238	17.101	7.174	7.007	6.301	7.205	6.842	8.572	18.097	6.329	7.164	8.131	8.065	7.649	6.497	5.725	4.358	126.463	63.726	202.298	195.182	7.041	6.145	23.551	11.525	5.825	10.281
1451452_a_at	Rgs16	4.443	4.471	12.145	4.329	4.151	4.235	7.238	7.308	4.561	4.466	4.319	4.388	4.331	4.372	4.481	4.374	14.01	12.501	4.494	5.941	4.358	5.897	4.455	4.465	4.573	4.625	4.772	4.518	4.522	5.336	4.621	4.693	4.551	4.55	4.538	4.327	4.354	4.315	12.461	63.519	15.378	91.633	4.38	4.118	4.555	4.645	4.789	4.645
1455265_a_at	Rgs16	16.626	14.548	56.795	25.119	7.616	13.099	28.381	18.927	64.553	19.675	13.038	15.672	16.05	16.372	16.903	17.955	22.023	17.668	20.688	28.389	15.347	21.551	89.174	94.689	23.203	24.861	48.054	79.277	289.858	318.228	62.394	88.162	55.785	63.262	17.676	15.258	15.246	14.649	66.474	52.073	67.453	57.171	18.088	10.289	71.673	121.539	24.848	18.435
1452899_at	Rian	20.467	8.039	9.258	9.028	738.916	533.032	1223.34	1569.43	7.718	7.832	39.635	44.056	9.078	9.152	5.777	5.734	559.329	428.375	597.7	781.746	1062.12	772.94	10.032	9.088	5.897	5.914	6.128	8.975	21.281	7.989	8.661	7.05	8.438	7.922	403.061	550.935	397.401	489.031	212.464	129.181	103.989	134.926	8.018	13.412	10.763	8.804	8.151	8.088
1436325_at	Rora	104.144	121.611	53.567	60.088	207.789	223.425	36.442	33.641	7.764	15.015	151.964	115.659	28.935	21.713	13.795	14.313	304.56	240.873	79.54	52.42	63.603	30.171	328.296	345.127	16.658	16.973	1083.68	799.36	56.092	34.536	29.504	30.023	31.578	25.059	15.245	15.726	29.497	50.769	18.479	8.027	20.002	16.028	1626.64	1971.19	346.412	374.472	17.715	14.925
1425162_at	Rorb	4.768	5.02	4.26	4.388	4.339	4.197	17.129	28.708	4.681	5.316	4.447	4.398	4.489	4.364	4.774	4.181	11.222	12.936	57.832	59.835	25.979	42.924	5.706	4.728	4.67	4.357	4.907	4.665	4.574	4.51	4.518	4.808	4.633	4.644	4.577	4.357	17.143	9.512	4.885	5.112	5.08	4.663	7.234	4.599	5.012	8.532	5.045	4.828
1439862_at	Rorb	4.42	4.307	4.136	4.077	4.245	4.096	118.282	85.504	4.422	4.333	4.182	4.232	4.201	4.179	4.395	4.242	8.512	8.183	378.858	243.362	124.382	183.537	8.919	19.404	4.441	4.488	4.952	5.579	4.397	4.479	4.486	4.524	4.368	4.409	4.333	4.132	122.243	124.538	5.47	4.865	5.253	4.402	4.231	4.011	12.71	6.724	4.586	4.558
1455799_at	Rorb	9.222	9.227	9.014	9.017	9.906	8.951	94.624	109.527	8.639	8.379	9.057	8.118	8.337	8.405	9.209	7.786	25.607	69.65	289.595	219.607	150.87	153.453	72.609	56.572	8.724	8.764	41.271	22.915	9.445	8.783	9.256	9.609	9.14	8.501	9.284	8.319	128.53	140.17	9.889	11.457	10.788	9.182	9.146	8.118	79.179	104.279	11.866	10.704
1449961_at	Rph3a	4.801	4.903	4.67	4.53	5.777	4.526	72.113	80.887	4.983	4.9	4.598	4.78	4.736	4.8	4.863	4.762	108.832	89.262	174.574	144.988	203.575	205.207	4.871	4.859	5.023	5.08	5.193	4.925	4.97	5.003	5.062	5.11	4.93	4.996	126.695	103.707	63.946	128.264	5.715	6.271	5.618	4.974	4.838	4.404	6.062	5.127	5.192	5.159
1431050_at	Rps6ka5	69.671	85.656	23.637	25.501	35.731	29.333	89.071	93.71	78.096	69.934	27.673	33.508	115.008	150.732	111.406	148.132	170.53	167.229	50.317	41.896	40.548	38.466	16.841	14.144	207.095	228.782	36.4	33.578	85.333	69.801	138.526	137.633	171.884	120.301	85.501	67.668	423.174	498.963	29.02	26.694	43.01	79.599	28.956	25.114	21.572	17.683	201.986	242.164
1429759_at	Rps6ka6	5.628	5.674	26.759	15.603	10.601	13.503	115.028	140.287	7.212	5.68	9.913	11.035	6.593	5.501	5.64	5.422	38.548	22.831	11.934	14.341	41.329	46.195	17.661	10.855	6.851	6.649	8.03	5.626	5.728	5.979	7.728	5.978	6.09	5.835	33.38	80.931	47.426	42.457	2055.76	2133.89	2903.85	2474.64	949.082	1249	7.771	9.491	6.083	6.02
1429760_at	Rps6ka6	5.294	5.447	5.153	5.002	5.011	5.335	9.091	6.539	5.693	5.353	5.225	5.668	5.245	5.198	5.5	5.304	5.249	5.371	5.519	8.777	5.37	5.404	5.659	12.555	5.737	5.723	6.046	6.224	5.536	5.792	5.806	5.825	5.65	5.677	6.061	5.398	5.586	5.365	77.91	31.001	121.956	152.622	6.268	10.163	6.936	6.347	5.911	5.85
1444270_at	Rshl3	5.621	5.543	18.617	76.702	4.913	5.383	57.163	40.619	5.78	5.733	20.473	9.837	5.468	5.466	5.63	5.518	5.792	5.405	5.883	5.87	6.122	6.769	5.694	5.833	5.854	5.953	6.128	5.682	5.791	5.898	5.894	5.906	5.818	5.769	5.725	5.443	5.497	5.037	7.467	7.892	7.344	22.474	5.81	5.312	5.912	5.986	6.099	6.176
1442809_at	Scn9a	9.657	9.857	7.239	7.443	7.504	9.481	9.995	7.208	10.885	9.433	7.976	8.535	8.561	7.983	9.46	8.495	8.349	7.921	8.624	8.547	7.277	9.083	10.406	9.065	11.07	11.783	13.631	10.856	9.62	23.537	11.874	12.263	10.519	10.857	469.033	407.742	9.886	7.699	20.23	19.923	16.502	11.869	9.066	6.834	11.079	13.18	14.853	12.963
1436313_at	Scyl2	22.749	22.812	24.661	23.521	39.016	51.212	40.098	34.204	45.136	55.958	30.301	31.666	45.775	33.031	40.418	42.855	31.581	29.009	30.964	31.93	33.347	29.43	35.535	37.831	72.047	55.149	96.332	77.787	67.746	52.852	56.436	46.309	45.313	41.671	37.934	33.676	32.304	38.182	54.39	54.089	51.06	50.524	38.275	26.171	46.971	60.395	45.126	24.865
1436314_at	Scyl2	44.325	56.198	61.233	83.775	44.25	49.532	47.321	45.825	59.721	57.564	119.495	86.526	90.633	65.176	137.793	118.938	53.286	50.6	54.296	43.697	65.199	57.971	50.234	45.235	94.158	94.705	89.233	83.999	64.761	83.131	94.711	94.527	71.892	76.383	85.062	69.359	31.144	45.62	180.002	105.093	127.258	179.202	65.854	68.614	37.216	29.255	86.637	83.593
1448367_at	Sdf4	14.9	10.781	9.686	9.392	8.466	7.467	23.987	20.596	9.081	8.92	12.419	8.959	8.885	8.012	15.488	9.482	42.102	43.515	35.33	11.594	18.999	17.557	8.578	8.531	9.123	9.104	9.292	9.55	7.241	9.064	9.666	9.198	9.515	9.058	43.308	26.335	8.853	16.609	10.849	10.863	12.111	9.553	10.291	9.141	9.096	9.21	12.096	10.062
1436102_at	Sec22c	11.819	7.828	7.14	11.911	10.633	8.401	61.27	51.336	21.853	21.324	16.865	13.396	23.037	19.136	28.44	22.263	13.375	14.11	18.591	20.6	53.794	76.226	48.834	43.124	43.525	33.25	98.799	97.036	21.167	20.389	11.777	12.589	19.947	14.568	48.229	45.062	66.551	46.057	26.365	17.995	17.244	18.22	13.45	12.175	64.052	42.73	11.207	7.587
1456091_at	Sec22c	7.34	20.374	20.103	28.757	11.492	6.775	24.787	37.591	19.373	31.203	14.598	15.42	47.804	21.498	79.2	76.145	11.859	12.74	14.695	14.155	35.159	26.291	14.632	12.028	77.228	68.349	100.248	105.27	24.642	13.259	24.924	14.33	31.461	27.342	14.378	26.332	39.89	31.781	30.194	21.048	16.672	43.584	7.094	15.563	19.637	47.571	48.187	44.123
1440128_s_at	Sez6l	5.138	5.139	4.675	4.735	4.61	4.533	17.987	24.631	5.107	5.102	4.641	4.721	4.714	4.814	4.987	4.884	5.093	5.654	9.218	13.345	14.139	12.178	4.938	4.961	5.109	5.195	5.335	5.131	5.117	5.157	5.188	10.289	5.088	5.118	5.245	4.807	5.03	4.566	5.689	5.701	6.521	5.243	5.149	4.472	5.202	5.288	5.336	5.28
1457265_at	Sfrs17b	15.842	11.62	71.682	40.837	163.813	150.646	250.425	208.165	360.327	143.931	105.986	60.862	86.104	54.308	44.468	34.418	315.744	289.099	191.898	167.975	232.351	281.72	1233.51	971.324	125.815	228.308	888.945	887.317	224.435	301.692	72.575	114.564	81.752	117.137	232.208	220.706	277.564	262.804	57.457	47.73	112.544	106.659	51.981	95.774	377.614	288.966	37.297	30.298
1457686_at	Sfrs17b	7.41	7.62	7.927	9.059	34.717	22.731	75.706	64.081	7.95	7.716	34.449	14.856	7.285	7.764	7.85	8.427	82.439	64.474	65.628	55.623	69.589	53.905	24.117	22.404	8.429	7.889	53.012	40.078	7.868	8.528	8.039	8.148	7.734	7.739	79.907	76.465	21.672	65.164	8.609	15.359	8.666	15.546	7.367	17.178	8.009	8.55	10.346	9.58
1456261_at	Sh3kbp1	41.468	41.499	18.595	14.614	10.018	8.779	47.443	54.9	151.924	163.527	35.313	38.989	78.323	56.112	41.42	49.858	11.463	14.228	26.681	31.147	41.065	40.98	13.069	8.856	76.053	93.137	9.2	9.259	22.686	19.011	43.643	52.907	70.029	63.359	22.463	31.945	134.219	101.65	35.341	34.544	30.429	20.381	41.128	79.273	41.741	35.135	179.832	139.108
1417639_at	Slc22a4	50.322	41.658	27.217	18.932	9.431	15.31	19.053	15.038	6.457	6.931	6.136	5.932	203.173	124.307	256.484	301.827	269.809	227.467	9.382	9.354	30.961	25.07	8.429	8.326	23.992	11.721	9.516	22.251	6.112	8.66	8.431	7.956	6.13	7.371	7.138	11.333	6.152	6.731	9.433	9.463	10.174	7.618	362.848	492.199	9.452	8.001	8.712	8.066
1422756_at	Slc32a1	3.579	3.649	3.564	3.558	7.265	3.531	539.355	454.282	3.647	3.544	3.567	3.623	3.658	3.335	3.636	3.53	451.633	548.479	216.572	173.934	168.985	225.747	3.661	3.68	3.613	3.684	3.814	3.637	3.929	3.655	3.671	3.682	3.621	3.617	3.679	3.578	1011.93	1281.09	4.122	4.259	4.043	3.633	3.624	3.488	3.673	3.714	3.75	3.721
1455246_at	Smarcc1	21.176	26.778	110.986	138.016	321.621	375.271	137.661	93.854	20.373	25.075	49.993	45.668	327.429	229.804	209.844	235.201	12.115	13.111	91.608	64.225	149.461	195.796	15.081	25.617	138.785	143.876	47.866	67.662	31.055	26.888	23.085	18.445	38.905	25.251	66.356	42.463	213.846	154.368	462.096	435.724	412.624	481.704	135.694	192.328	12.078	13.66	145.704	194.045
1445418_at	Smg6	28.878	25.279	29.279	28.268	46.862	28.737	20.281	24.423	35.761	56.543	34.712	25.28	33.961	24.848	27.171	33.051	25.521	21.686	24.562	17.035	23.191	24.654	18.541	29.697	52.313	31.125	30.988	28.705	25.122	23.947	24.77	24.009	28.766	27.304	28.091	27.783	24.115	32.199	43.945	43.115	41.271	53.987	28.51	43.279	29.258	31.515	35.198	138.932
1460053_at	Smyd4	54.625	121.438	21.044	20.977	43.863	62.323	44.125	45.889	34.487	58.826	37.359	48.539	12.843	14.473	16.267	13.541	18.567	21.004	21.603	21.434	35.381	40.072	123.974	121.982	95.727	82.201	118.42	106.816	48.49	27.689	21.992	36.112	65.613	49.122	31.099	39.346	21.109	19.641	146.883	88.687	64.495	97.866	12.508	13.864	89.807	75.672	16.61	13.087
1438729_at	Sox1	6.997	7.175	6.011	6.018	7.79	5.988	65.741	41.724	7.882	7.18	7.192	6.812	6.627	6.569	7.094	6.714	48.83	37.027	23.297	27.542	26.803	20.487	7.947	7.67	7.741	8.014	8.753	7.521	7.775	7.952	8.045	8.139	7.6	7.742	7.761	6.612	112.686	40.145	12.28	12.053	11.486	20.605	6.807	7.047	23.146	8.376	9.197	8.471
1436790_a_at	Sox11	5.963	6.247	5.573	5.536	6.173	5.537	43.962	40.085	6.8	6.073	5.699	5.948	5.784	5.758	6.657	5.972	6.252	5.74	14.972	10.641	12.666	22.507	6.054	5.98	6.353	6.389	6.694	6.169	7.698	6.351	6.363	6.495	6.107	6.236	28.578	9.919	21.42	20.598	164.367	126.106	11.572	54.054	6.294	5.421	6.915	6.534	7.523	6.539
1435192_at	Sox3	6.852	7.094	6.695	5.654	6.593	5.7	6.322	7.981	7.023	6.864	6.898	6.893	6.826	7.01	7.039	7.041	6.322	6.881	7.026	6.829	6.546	6.462	6.966	6.999	7.219	7.266	7.717	7.034	6.996	7.255	7.253	7.307	7.077	7.134	7.202	6.07	6.819	6.862	35.316	27.714	12.604	64.175	7.143	6.422	7.152	7.305	7.874	7.358
1419673_at	Spock1	4.477	4.508	7.447	5.518	4.393	4.59	62.497	46.527	4.701	4.53	4.608	4.655	4.661	4.427	4.679	4.444	53.996	52.288	126.888	58.234	116.141	118	190.091	242.877	4.698	4.766	4.806	4.709	4.693	4.745	4.697	4.749	4.682	4.667	79.5	61.568	32.548	47.517	4.918	5.01	4.953	4.784	4.453	4.507	6.088	25.791	4.828	4.746
1424415_s_at	Spon1	11.526	17.203	16.784	13.959	15.107	9.594	211.689	137.305	9.067	8.357	50.244	130.698	8.479	9.12	9.076	8.118	23.307	27.529	35.077	19.04	177.864	158.39	1213.9	1163.32	8.801	8.957	16.418	13.234	15.143	9.824	9.194	9.586	8.134	9.12	9.194	9.642	19.41	15.433	9.588	9.519	10.115	7.96	14.724	7.69	172.5	104.648	9.38	9.308
1441327_a_at	Ssr1	21.474	28.265	44.095	35.202	94.661	73.001	117.047	97.505	29.343	29.548	63.817	56.752	46.693	29.345	33.886	31.511	104.356	104.174	106.076	136.484	96.009	90.711	68.512	85.343	48.161	46.675	16.631	18.529	27.724	17.257	26.24	27.911	70.005	59.819	61.053	109.702	113.996	131.588	16.334	14.574	26.03	39.92	53.512	85.203	32.186	34.909	33.02	32.769
1438566_at	St8sia6	15.965	15.796	281.073	489.338	16.451	15.162	17.886	16.228	98.06	68.923	422.74	437.356	22.398	34.4	15.827	15.318	15.675	18.617	15.884	18.405	14.883	15.298	49.749	39.932	84.636	84.472	464.896	409.452	33.117	46.509	307.334	287.095	21.441	27.924	15.971	13.976	23.211	15.643	17.933	16.952	17.868	13.398	33.51	21.715	48.677	17.481	73.172	91.141
1423530_at	Stk32c	4.097	4.054	3.972	3.96	4.08	4.004	5.68	5.526	4.1	4.005	4.057	4.1	3.991	4.024	4.046	4.029	4.069	3.961	11.435	9.627	12.52	16.265	4.03	4.018	4.077	4.137	4.207	4.036	4.123	4.149	4.247	4.334	4.051	4.046	4.181	4.083	5.029	38.678	4.504	4.469	4.34	4.134	4.107	3.849	4.14	4.158	4.269	4.183
1419913_at	Strap	24.642	39.606	13.975	27.119	31.178	45.239	34.864	23.829	15.49	21.118	31.089	40.59	81.438	28.275	146.345	71.868	28.599	20.257	40.93	22.832	49.611	38.782	14.779	14.834	30.556	35.194	54.848	41.598	15.131	27.471	12.558	30.792	15.375	13.046	98.571	51.299	89.919	26.81	266.881	205.976	260.762	164.959	29.707	39.458	19.024	27.863	32.164	54.538
1433909_at	Syt17	4.899	4.917	4.887	4.812	19.613	20.19	470.312	574.528	4.864	4.844	4.851	5.018	4.82	4.845	4.772	4.896	5.018	4.785	281.027	240.376	533.997	482.76	54.942	53.198	4.909	4.945	5.58	4.882	11.849	5.175	4.943	7.411	4.876	4.879	4.936	11.307	4.855	4.852	5.125	5.151	5.137	5.164	4.851	4.731	13.068	5.618	5.006	4.987
1460627_at	Thsd7b	14.148	12.647	8.636	9.023	11.809	9.534	32.342	27.325	13.881	15.463	9.085	9.758	11.227	13.16	12.456	13.693	10.716	10.04	23.951	14.582	16.246	24.482	14.774	14.793	14.744	14.644	18.329	12.854	14.903	15.38	14.433	16.563	12.711	13.239	44.223	94.802	10.083	10.213	29.478	28.223	25.001	16.176	12.472	9.022	16.758	18.658	22.254	18.074
1450853_at	Tle4	158.319	135.812	96.075	105.979	247.075	168.766	535.741	412.574	505.476	455.715	312.48	204.834	582.353	479.606	668.759	589.344	162.656	129.049	886.495	981.842	887.675	1177.05	945.326	1136.74	645.844	571.874	1077.72	900.683	510.83	520.275	519.442	514.418	456.405	585.898	625.933	717.021	3466.17	2666.92	2382.92	2393.66	2530.27	2511.22	363.844	586.234	414.646	292.131	883.255	940.664
1423295_at	Tm9sf2	206.62	203.489	245.081	321.912	209.572	185.337	126.526	160.177	122.472	107.797	359.551	338.981	200.905	172.781	170.658	154.285	104.743	121.116	183.417	173.43	201.517	161.907	129.99	182.672	149.197	85.163	209.7	141.599	173.681	278.895	183.134	136.017	101.541	168.386	292.735	255.218	223.759	110.499	174.15	159.703	176.048	208.755	105.176	242.776	91.744	130.673	249.95	258.492
1441598_at	Tmeff2	8.051	6.576	6.008	5.716	14.548	10.053	130.36	250.693	12.005	6.565	6.104	6.66	6.131	6.074	6.522	6.318	16.224	24.976	28.36	39.531	50.243	73.934	6.411	6.436	6.8	6.964	7.911	6.958	6.838	6.844	7.333	7.017	7.004	6.93	188.04	148.882	87.952	148.316	9.128	8.989	8.571	6.797	6.302	5.818	7.028	8.3	7.764	7.475
1433740_at	Tmem87b	155.067	111.391	225.622	259.628	347.197	342.854	35.105	21.601	99.936	87.643	248.351	235.001	118.05	92.679	52.554	60.907	110.689	112.242	32.667	40.125	44.527	46.382	302.73	299.812	52.09	47.759	137.291	170.56	79.828	112.346	66.079	74.672	118.212	69.9	170.67	236.111	76.674	49.403	67.572	43.973	55.991	58.171	206.506	311.853	168.034	121.748	96.914	149.342
1452851_at	Tnrc4	3.998	3.997	3.86	3.847	3.952	4.008	6.75	7.141	4	3.986	3.932	4.034	3.924	3.95	4.01	3.953	9.189	4.024	5.201	8.731	8.813	7.757	4.31	4.652	4.054	4.06	9.765	6.918	4.007	4.045	4.053	4.053	3.994	4.011	4.111	4.21	5.746	5.12	4.234	4.228	4.218	4.046	4.048	3.827	4.06	5.315	4.105	4.092
1423310_at	Tpbg	10.066	10.226	9.691	10.052	9.636	10.366	147.103	130.164	11.317	9.766	112.474	111.009	37.836	20.694	9.775	9.109	12.203	10.492	128.057	158.096	85.125	70.205	32.723	17.874	11.557	11.186	20.935	43.818	12.863	10.771	12.755	12.759	10.656	10.541	10.765	9.027	218.417	118.847	60.858	46.457	44.68	94.586	412.698	482.586	21.608	54.142	14.219	11.746
1423311_s_at	Tpbg	12.4	12.76	11.949	6.538	12.652	11.888	142.064	119.831	9.062	8.166	47.619	33.261	27.204	16.668	8.794	12.22	12.216	9.525	72.971	61.712	80.651	70.984	12.251	13.37	7.216	9.745	14.652	13.237	11.337	9.199	9.668	9.127	8.42	7.792	8.649	12.545	212.556	105.611	40.821	29.757	93.591	58.127	139.063	297.599	12.522	12.7	11.677	10.696
1457156_at	Trhde	17.141	7.348	6.485	6.981	5.289	5.56	75.871	54.645	5.966	5.859	5.477	5.727	5.683	5.695	5.907	5.651	223.822	193.619	218.943	209.853	82.013	98.743	5.831	5.885	6.004	6.071	6.381	5.84	5.856	6.063	6.116	6.189	5.882	5.957	10.428	11.068	5.669	5.601	7.26	7.323	7.069	5.996	5.798	5.271	7.829	6.221	6.331	6.226
1456089_at	Trim23	8.282	8.274	11.742	11.827	12.388	16.091	56.938	65.492	20.729	13.201	18.097	11.802	24.87	22.718	17.952	18.966	45.028	59.398	77.411	65.214	65.573	53.625	38.465	39.866	25.661	24.754	28.296	21.346	20.748	18.544	14.869	13.708	24.654	18.813	40.127	32.292	65.102	69.849	29.418	24.104	22.869	30.368	14.742	15.552	42.919	27.973	21.459	14.346
1424012_at	Ttc30a1	11.972	11.393	37.511	42.561	19.218	20.74	36.914	48.737	23.228	25.411	22.128	24.875	26.072	23.312	13.402	37.487	11.235	20.818	20.432	21.982	25.191	28.502	28.115	25.054	94.756	95.817	43.484	35.555	27.529	37.984	26.369	9.782	49.618	40.781	25.714	17.258	36.623	24.037	126.977	94.897	30.166	83.47	33.871	34.823	15.142	12.625	40.995	29.079
1452964_at	Ttll11	7.179	6.239	6.963	6.942	6.893	6.889	54.658	59.942	6.957	12.067	6.098	7.08	13.859	16.77	10.093	13.91	28.485	29.405	73.454	92.261	234.598	128.269	9.118	7.064	6.288	7.117	6.731	6.798	7.635	7.122	7.288	7.527	7.824	7.203	29.027	36.297	112.152	182.964	6.622	5.659	6.59	5.318	4.965	4.794	7.239	7.103	6.409	5.416
1426518_at	Tubgcp5	33.263	30.45	46.778	47.644	67.047	99.418	67.738	74.763	129.086	117.61	48.724	23.4	86.26	76.559	55.455	63.626	75.173	82.351	68.658	67.864	64.434	70.978	99.203	69.188	120.54	110.796	39.257	49.598	66.511	76.038	97.283	68.011	718.912	695.924	91.311	95.248	152.424	133.561	90.916	73.382	31.7	53.674	30.965	82.07	27.66	66.636	136.744	111.219
1448805_at	Usf1	18.598	13.154	55.597	56.447	59.926	47.749	116.782	113.516	35.513	36.749	42.697	32.455	49.867	53.497	108.31	96.14	46.465	42.377	39.961	27.04	91.394	61.094	17.1	22.891	45.857	46.474	15.945	26.852	33.679	31.239	53.827	46.091	49.001	43.76	23.778	34.452	59.937	81.933	116.558	100.894	47.908	77.525	42.895	52.042	28.85	19.528	350.17	309.587
1428664_at	Vip	5.865	5.821	6.395	7.572	10.006	6.491	649.9	875.073	6.456	5.958	37.443	6.03	5.67	5.852	5.885	5.414	5.776	5.221	1867.3	1817.63	2115.82	2021.05	6.006	6.028	6.052	6.306	6.937	6.069	41.997	6.295	6.756	6.39	5.97	5.995	6.012	5.858	5.901	5.919	7.037	7.09	6.82	6.053	5.937	5.464	8.298	11.574	6.197	6.155
1442169_at	Vldlr	196.651	263.718	14.282	33.548	23.456	28.835	40.912	33.811	6.933	6.791	14.724	9.69	12.301	17.085	6.812	6.513	66.553	60.172	19.222	27.112	27.84	13.271	25.64	31.351	8.472	10.305	10.546	8.648	7.079	7.693	7.878	8.142	6.84	8.933	17.81	9.325	91.065	53.598	7.488	7.505	7.423	6.934	34.932	37.096	48.963	56.192	7.068	9.299
1455882_x_at	Vwc2	10.882	14.168	12.498	21.998	11.247	21.315	85.723	100.172	19.155	26.928	21.381	13.698	13.987	9.756	10.698	10.976	25.125	14.494	21.445	28.667	26.587	58.988	229.588	167.884	36.776	18.684	20.806	80.586	194.762	34.497	18.772	19.201	15.673	23.275	16.436	24.06	22.702	18.359	23.544	15.248	15.138	13.579	13.51	8.697	54.742	68.784	14.864	14.314
1453212_at	Zfp383	31.867	30.795	63.017	77.515	70.496	101.398	83.618	90.248	66.143	43.19	92.481	96.603	31.658	26.187	12.71	14.747	154.121	110.986	64.221	63.043	89.027	127.442	118.168	220.903	61.353	92.734	38.089	31.929	35.225	28.859	30.901	38.157	60.941	34.478	34.976	35.128	109.741	109.12	103.447	91.503	75.952	91.78	88.029	66.978	113.943	90.933	91.755	112.964
1419380_at	Zfp423	47.486	33.386	29.33	85.837	76.415	47.57	92.563	85.419	6.018	5.933	11.684	11.481	6.062	5.855	5.968	6.722	18.297	13.253	10.811	6.318	19.341	28.29	27.291	23.957	5.718	6.08	6.219	6.022	6.015	5.828	5.823	6.1	5.564	5.846	7.783	29.905	6.789	5.698	544.991	451.957	259.338	282.365	6.094	5.915	15.126	6.952	6.175	6.217
1457059_at	Zfp438	67.166	51.327	33	39.178	40.961	45.134	21.621	30.866	74.216	88.223	45.516	31.585	41.743	27.618	24.935	28.905	29.528	12.306	19.999	9.259	31.202	31.453	176.168	89.127	86.307	105.9	50.478	36.421	92.496	88.443	50.588	56.272	76.189	58.401	16.824	22.187	46.699	42.333	40.151	65.681	34.989	56.049	12.158	11.042	128.321	61.993	28.515	35.427
1426564_at	Zfp553	11.834	13.173	21.904	21.811	35.674	45.219	38.091	38.147	64.617	57.049	33.498	12.785	15.671	18.881	26.255	20.841	39.554	35.815	44.773	42.422	54.009	39.301	83.69	33.862	130.565	113.899	102.068	101.745	51.641	98.479	40.208	56.991	84.601	52.917	34.541	13.683	20.831	32.627	223.017	178.686	280.57	338.869	28.462	27.787	65.443	56.291	117.32	73.81
1455591_at	Zfp618	5.616	7.457	19.424	36.478	45.726	66.195	31.535	20.669	4.936	4.091	35.424	19.941	8.626	10.039	7.434	5.802	5.785	7.232	9.278	7.437	7.272	8.092	487.048	455.65	6.497	6.168	288.977	199.507	13.819	12.583	6.209	4.2	7.26	7.479	13.408	8.14	12.099	11.768	6.902	7.94	8.176	47.242	6.914	6.459	272.805	238.776	5.791	4.229
1421301_at	Zic2	5.249	5.384	5.198	4.985	5.449	4.551	8.744	5.502	9.796	5.565	5.136	5.288	5.566	5.254	5.254	5.371	18.786	24.62	5.78	11.616	5.758	5.579	34.085	48.353	5.916	5.938	6.366	5.532	11.531	8.207	5.926	6.118	5.715	5.836	5.703	5.626	5.624	5.236	9.864	10.238	8.565	5.946	5.319	4.859	24.339	24.866	6.524	6.051
1442154_at	Zrsr2	12.97	12.272	10.153	17.172	10.14	11.793	51.72	40.681	11.697	23.913	10.067	10.964	16.671	10.339	14.393	23.701	15.967	19.647	34.799	21.853	52.115	46.773	16.629	20.63	26.284	16.72	19.372	33.512	20.35	10.815	15.326	17.077	14.425	15.441	35.96	25.486	58.793	26.248	23.138	29.586	22.309	19.181	7.342	15.198	15.682	18.039	23.148	20.829
[truncated: 117 more columns]
