# Supplementary figures and images for: Lhx1 maintains synchrony among circadian oscillator neurons of the SCN
Source: eLife journal article supplement (doi:10.7554/elife.03357), 2014-07-17

Figure 2 - figure supplement 2

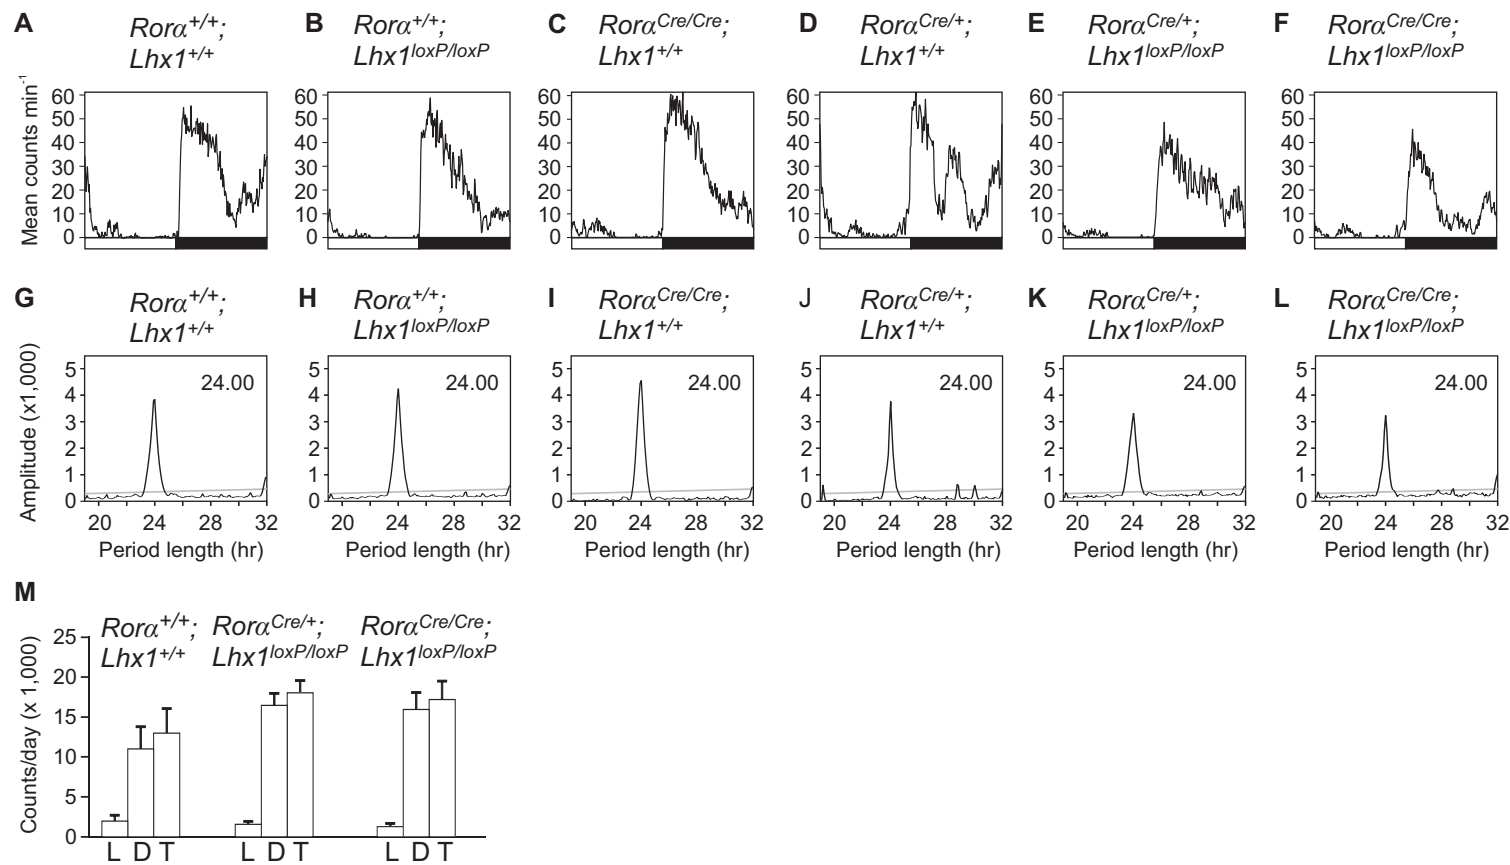

Supplement: supp [file elife-03357-supp-v1.zip]

Figure 4 - figure supplement 1

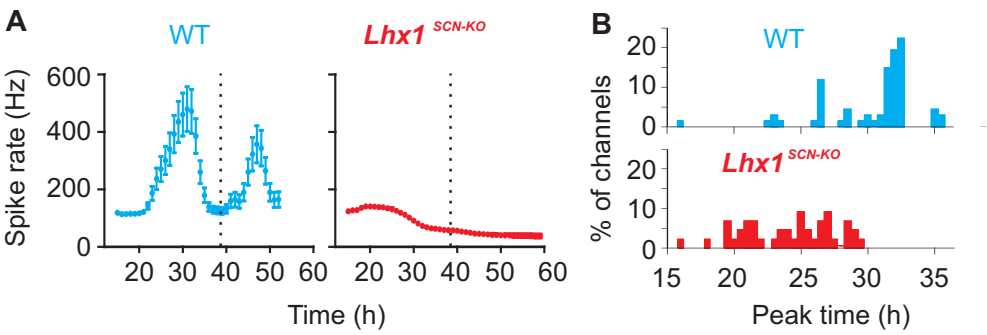

Supplement: supp [file elife-03357-supp-v1.zip]

Figure 3 - figure supplement 2

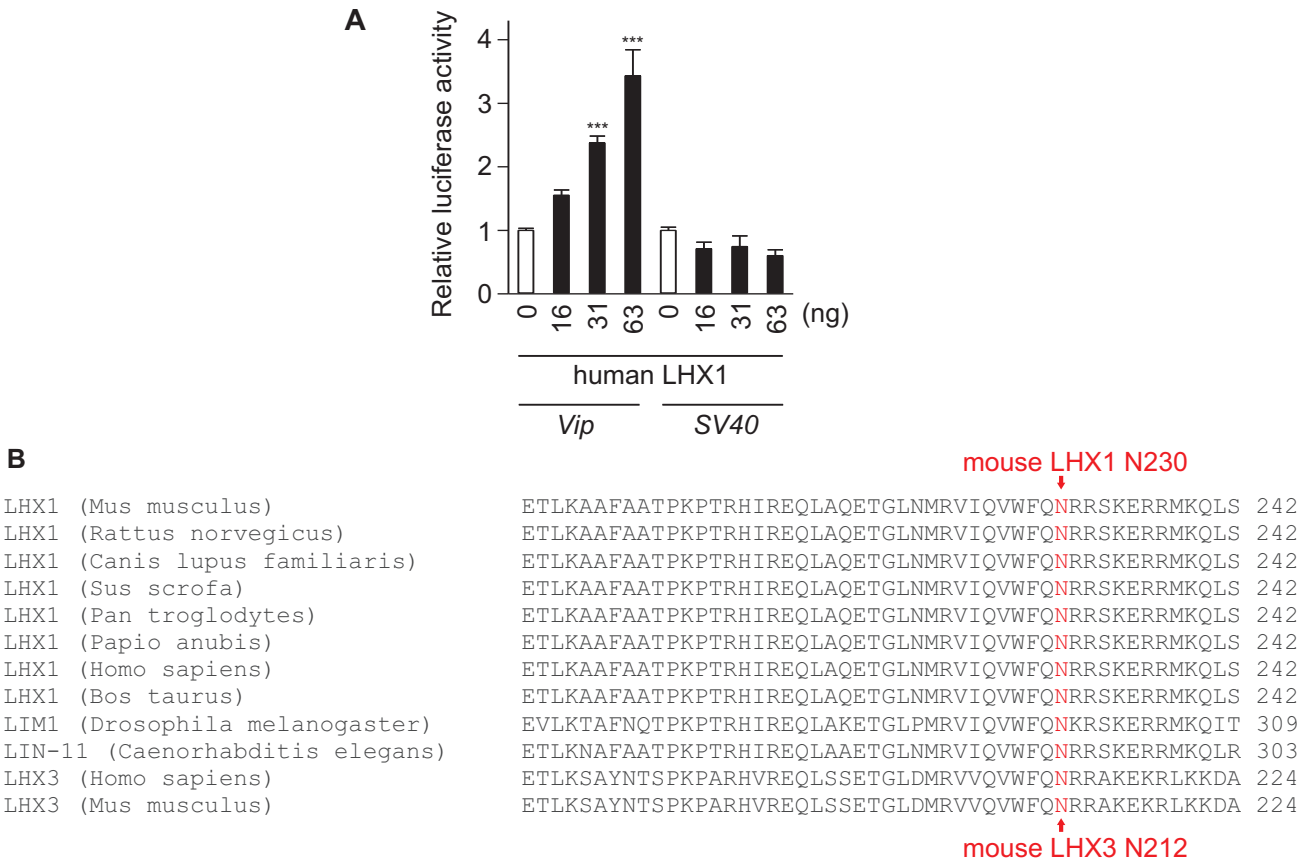

Supplement: supp [file elife-03357-supp-v1.zip]

Figure 1 - figure supplement 3

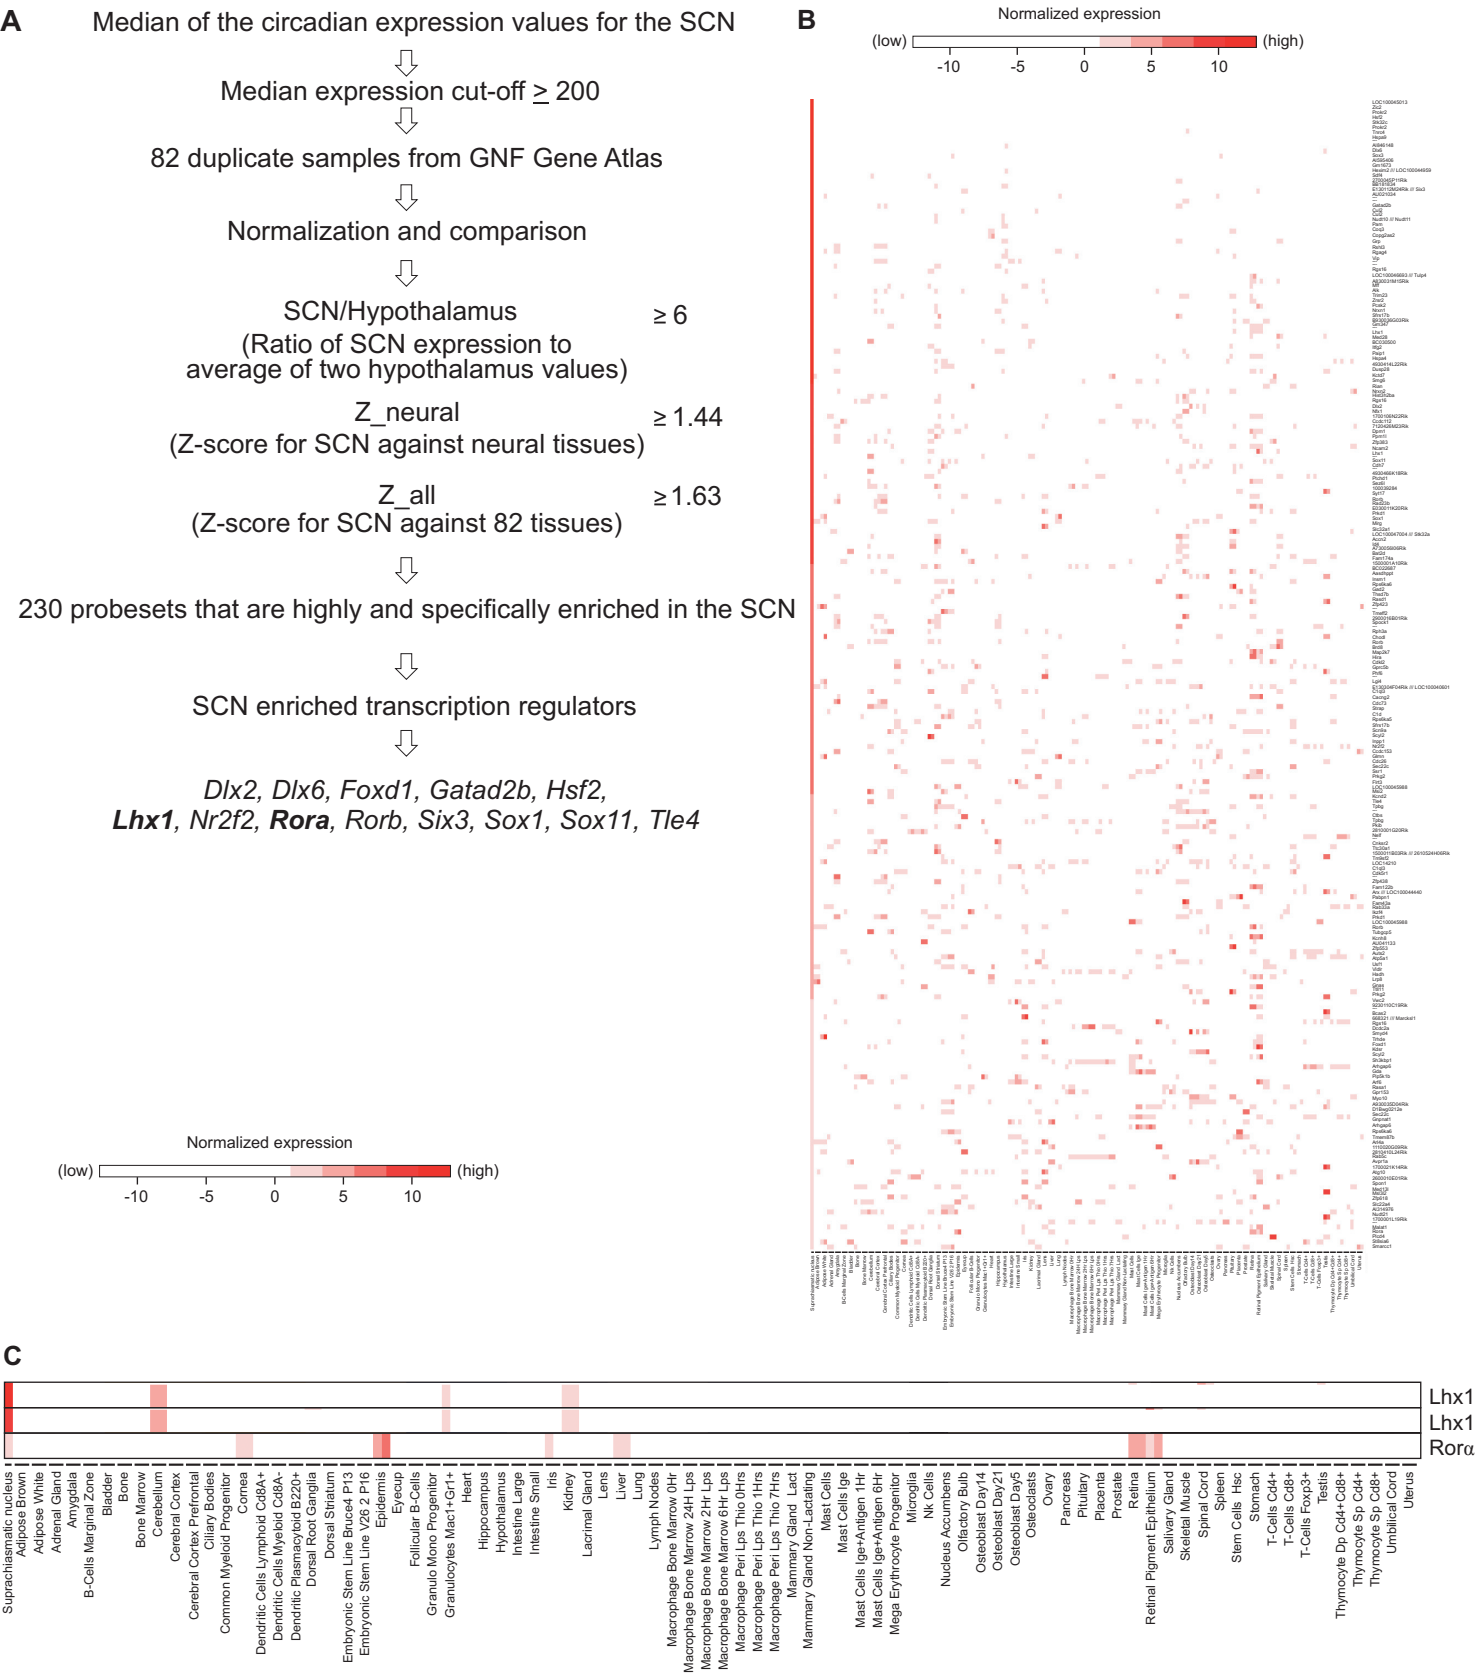

Supplement: supp [file elife-03357-supp-v1.zip]

Figure 3 - figure supplement 1

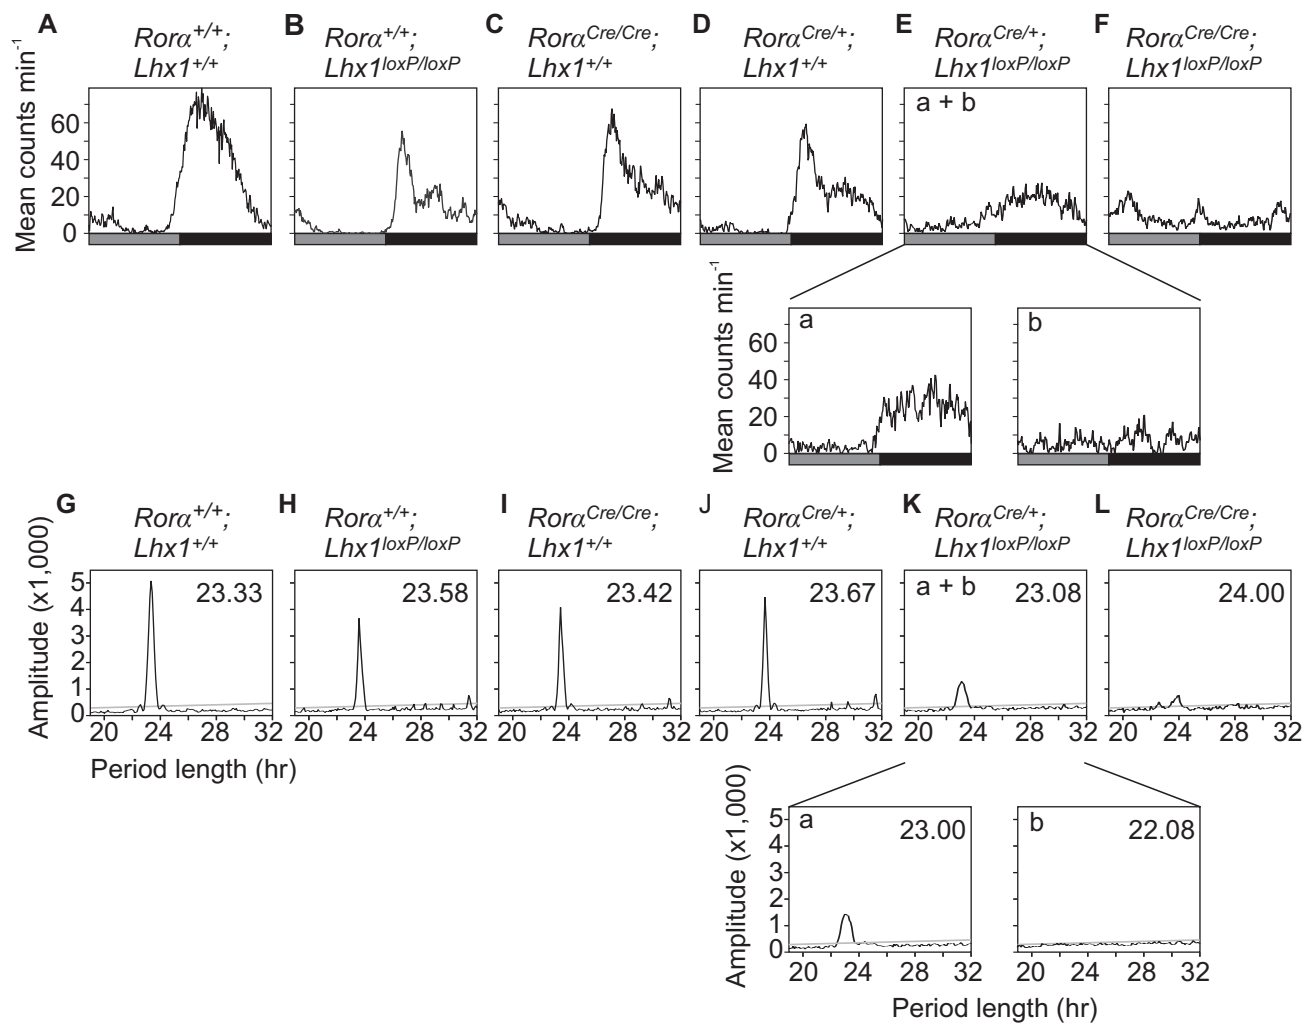

Supplement: supp [file elife-03357-supp-v1.zip]

Figure 1 - figure supplement 1

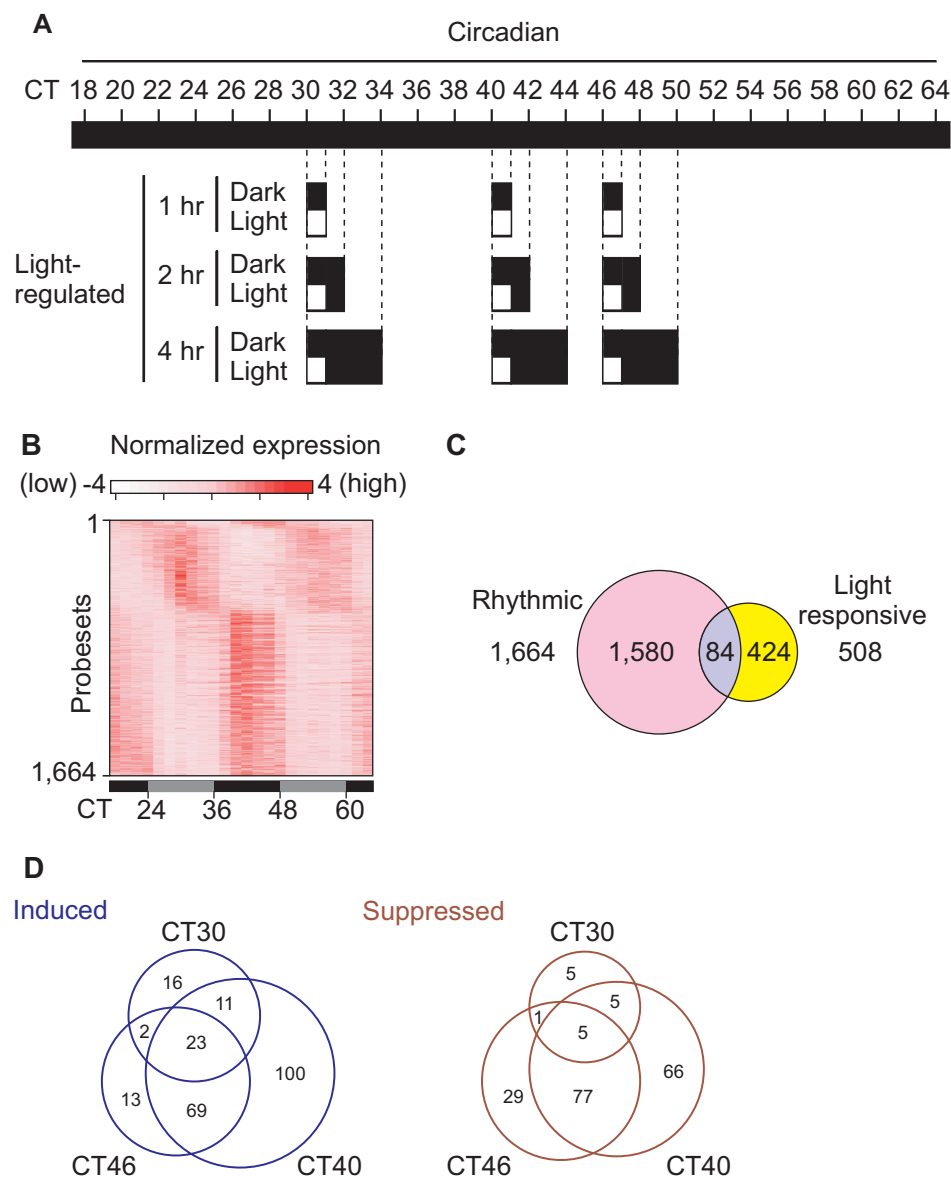

Supplement: supp [file elife-03357-supp-v1.zip]

Figure 1 - figure supplement 2

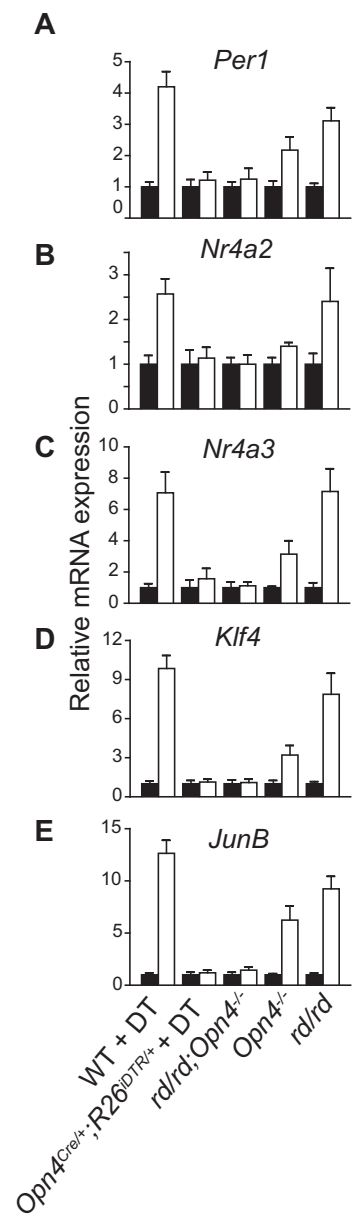

Supplement: supp [file elife-03357-supp-v1.zip]
